# Supplementary material for: Bioactivation of Napabucasin Triggers Reactive Oxygen Species–Mediated Cancer Cell Death
Source: Oxford University Press journal article supplement (doi:10.1158/1078-0432.ccr-19-0302), 2019-09-16
Supplement: 10780432ccr190302-sup-216074_2_supp_5743262_px0g2p.xlsx [file 10780432ccr190302-sup-216074_2_supp_5743262_px0g2p.xlsx]

## Sheet: Parental napa_vs_DMSO
baseMean	log2FoldChange	lfcSE	stat	pvalue	padj	EnsemblID	GeneName
1966.34	0.135261	0.0569033	2.37703	0.0174524	0.111188	ENSG00000000419.12	DPM1
139.796	-0.0348918	0.184006	-0.189623	0.849605	0.963992	ENSG00000000457.14	SCYL3
682.941	0.0621435	0.0855474	0.726422	0.46758	0.808973	ENSG00000000460.17	C1orf112
0.330788	0.18064	3.87635	0.0466005	0.962832	NA	ENSG00000000938.13	FGR
1.3224	0.148592	1.95996	0.0758141	0.939567	NA	ENSG00000000971.15	CFH
1802.08	0.0630744	0.0545973	1.15527	0.247981	0.615497	ENSG00000001036.13	FUCA2
395.238	0.331468	0.111566	2.97104	0.00296794	0.0282018	ENSG00000001084.12	GCLC
1138.33	0.0585822	0.0680034	0.86146	0.388985	0.752831	ENSG00000001167.14	NFYA
48.345	0.266988	0.323153	0.826196	0.408693	0.767223	ENSG00000001460.18	STPG1
149.808	0.0218902	0.192171	0.11391	0.909309	0.979116	ENSG00000001461.17	NIPAL3
1605.05	0.0360232	0.0597791	0.602605	0.546771	0.854722	ENSG00000001497.16	LAS1L
10.6239	0.500132	0.672507	0.743684	0.457068	NA	ENSG00000001617.12	SEMA3F
1566.28	-0.227351	0.0608984	-3.73329	0.000188992	0.00282007	ENSG00000001629.10	ANKIB1
1556.54	0.053782	0.0649853	0.827603	0.407896	0.766385	ENSG00000001630.17	CYP51A1
699.313	-0.0822121	0.0889744	-0.923997	0.355488	0.72664	ENSG00000001631.15	KRIT1
93.2178	-0.112625	0.219843	-0.512296	0.608444	0.882722	ENSG00000002016.17	RAD52
159.185	-0.125664	0.173743	-0.723276	0.469511	0.810214	ENSG00000002079.14	MYH16
365.152	0.19516	0.126786	1.53929	0.123735	0.420761	ENSG00000002330.13	BAD
1275.29	0.0683561	0.0637776	1.07179	0.283815	0.657929	ENSG00000002549.12	LAP3
629.252	0.0924388	0.0904693	1.02177	0.30689	0.6809	ENSG00000002586.20	CD99
629.252	0.0924388	0.0904693	1.02177	0.30689	0.6809	ENSG00000002586.20_PAR_Y	CD99
3.30881	-0.0526769	1.22682	-0.0429375	0.965751	NA	ENSG00000002745.13	WNT16
28.7306	-0.240289	0.39593	-0.606897	0.543919	0.853029	ENSG00000002746.15	HECW1
435.26	0.0964012	0.111704	0.863004	0.388135	0.752403	ENSG00000002822.15	MAD1L1
3755.43	-0.0355227	0.044151	-0.804575	0.421065	0.776565	ENSG00000002834.18	LASP1
335.106	0.203274	0.124743	1.62955	0.103197	0.379597	ENSG00000002919.14	SNX11
3737.41	0.0249178	0.0421791	0.590762	0.55468	0.858812	ENSG00000003056.8	M6PR
21.9101	-0.585125	0.47385	-1.23483	0.216893	0.574651	ENSG00000003096.14	KLHL13
2.13546	0.463541	1.52465	0.304031	0.761105	NA	ENSG00000003137.8	CYP26B1
11.3013	-0.222273	0.698101	-0.318396	0.750185	NA	ENSG00000003147.19	ICA1
265.162	0.0827338	0.133758	0.618535	0.536223	0.848808	ENSG00000003249.13	DBNDD1
910.091	-0.050278	0.0771295	-0.651865	0.514488	0.836464	ENSG00000003393.15	ALS2
202.184	0.144366	0.150091	0.961857	0.336121	0.710147	ENSG00000003400.14	CASP10
1082.56	-0.303049	0.070066	-4.3252	1.52395e-05	0.000316556	ENSG00000003402.20	CFLAR
2425.93	0.0135998	0.0496424	0.273956	0.784118	0.942985	ENSG00000003436.16	TFPI
376.336	-0.073367	0.113667	-0.645454	0.518633	0.837401	ENSG00000003509.16	NDUFAF7
880.297	-0.0492721	0.0785242	-0.627476	0.530347	0.845263	ENSG00000003756.16	RBM5
40.6549	-0.0758474	0.392342	-0.19332	0.846709	0.963003	ENSG00000003987.14	MTMR7
2.94082	-1.18416	1.34165	-0.882615	0.377445	NA	ENSG00000003989.17	SLC7A2
1514.03	0.0986046	0.0647126	1.52373	0.127576	0.428048	ENSG00000004059.11	ARF5
151.464	-0.0785664	0.186394	-0.421507	0.673385	0.905369	ENSG00000004139.14	SARM1
2779.86	-0.00606797	0.04662	-0.130158	0.896441	0.976371	ENSG00000004142.12	POLDIP2
784.851	-0.138684	0.0876754	-1.58179	0.113698	0.40172	ENSG00000004399.12	PLXND1
5077.79	0.0522269	0.04008	1.30307	0.192552	0.540388	ENSG00000004455.16	AK2
4456.58	0.0800801	0.0390449	2.05097	0.0402695	0.203842	ENSG00000004478.8	FKBP4
1633.9	0.000475056	0.0576805	0.008236	0.993429	0.998109	ENSG00000004487.16	KDM1A
567.82	0.0341941	0.0970349	0.352389	0.724546	0.924257	ENSG00000004534.15	RBM6
84.8275	0.0820992	0.23865	0.344015	0.730835	0.926632	ENSG00000004660.14	CAMKK1
3389.74	-0.0630026	0.0569755	-1.10578	0.26882	0.641206	ENSG00000004700.16	RECQL
437.28	-0.00442092	0.114641	-0.0385631	0.969239	0.990304	ENSG00000004766.17	VPS50
1.0006	0.180775	2.00069	0.0903565	0.928004	NA	ENSG00000004776.13	HSPB6
43.144	0.286732	0.331861	0.864011	0.387582	0.75182	ENSG00000004777.18	ARHGAP33
1095.66	0.148008	0.0716805	2.06483	0.0389389	0.199199	ENSG00000004779.10	NDUFAB1
9.70996	-1.25585	0.715998	-1.75399	0.0794321	NA	ENSG00000004799.8	PDK4
0.523017	1.1241	3.03243	0.370692	0.710867	NA	ENSG00000004809.14	SLC22A16
2.63278	2.17401	1.45402	1.49518	0.134868	NA	ENSG00000004838.14	ZMYND10
2.71504	-0.148379	1.40146	-0.105874	0.915682	NA	ENSG00000004848.8	ARX
1238.42	-0.114963	0.0658055	-1.74701	0.0806356	0.32433	ENSG00000004864.13	SLC25A13
422.326	0.0920091	0.107241	0.857969	0.39091	0.754272	ENSG00000004866.20	ST7
3580.26	-0.17326	0.0560922	-3.08885	0.00200933	0.0204412	ENSG00000004897.12	CDC27
0.840688	0.784078	2.52812	0.310143	0.756452	NA	ENSG00000004939.15	SLC4A1
0.970818	0.151151	2.22269	0.0680038	0.945783	NA	ENSG00000004948.14	CALCR
1617.26	0.0376693	0.0589638	0.638855	0.522917	0.841365	ENSG00000004961.15	HCCS
316.603	0.0352268	0.128076	0.275046	0.783281	0.942985	ENSG00000004975.12	DVL2
1147.42	-0.0269267	0.0726825	-0.37047	0.711032	0.918227	ENSG00000005007.12	UPF1
1020.94	0.00318805	0.0746245	0.0427212	0.965924	0.989634	ENSG00000005020.13	SKAP2
8420.7	0.125787	0.034228	3.67499	0.000237863	0.00344902	ENSG00000005022.6	SLC25A5
573.226	0.0761282	0.0994016	0.765865	0.443757	0.791439	ENSG00000005059.16	MCUB
35.5919	-0.237576	0.35904	-0.661698	0.508165	0.83426	ENSG00000005073.5	HOXA11
742.836	-0.0250468	0.0816793	-0.306648	0.759112	0.933942	ENSG00000005075.15	POLR2J
945.664	-0.198784	0.0775949	-2.56182	0.0104124	0.0750487	ENSG00000005100.13	DHX33
1.16867	0.63461	2.08076	0.304989	0.760375	NA	ENSG00000005102.13	MEOX1
983.137	-0.12352	0.0798221	-1.54744	0.121757	0.417638	ENSG00000005156.11	LIG3
904.216	0.00762184	0.0828373	0.0920097	0.92669	0.982185	ENSG00000005175.10	RPAP3
2.76115	-1.4829	1.36331	-1.08772	0.276719	NA	ENSG00000005187.12	ACSM3
261.867	0.144809	0.1342	1.07906	0.280562	0.654872	ENSG00000005189.19	REXO5
1710.37	0.091443	0.0575882	1.58788	0.112314	0.39986	ENSG00000005194.15	CIAPIN1
277.909	0.098728	0.131433	0.751167	0.452552	0.79805	ENSG00000005206.17	SPPL2B
172.396	-0.0962363	0.1634	-0.588961	0.555887	0.859127	ENSG00000005238.19	FAM214B
65.3902	0.272495	0.266389	1.02292	0.306345	0.68078	ENSG00000005243.10	COPZ2
760.915	-0.139126	0.0875988	-1.58822	0.112237	0.399826	ENSG00000005249.13	PRKAR2B
607.603	-0.069748	0.0889971	-0.78371	0.43321	0.785831	ENSG00000005302.18	MSL3
374.868	-0.439551	0.118393	-3.71263	0.000205117	0.00302995	ENSG00000005339.14	CREBBP
898.233	-0.0491548	0.0793249	-0.619664	0.535479	0.848232	ENSG00000005436.13	GCFC2
236.537	-0.0283011	0.144019	-0.196509	0.844212	0.962126	ENSG00000005448.16	WDR54
96.7269	0.0975751	0.217643	0.448326	0.653918	0.897082	ENSG00000005469.11	CROT
0.608374	-2.64472	3.01064	-0.878457	0.379696	NA	ENSG00000005471.17	ABCB4
846.698	-0.41184	0.0785396	-5.24373	1.57364e-07	5.28411e-06	ENSG00000005483.20	KMT2E
581.436	0.0484709	0.0919704	0.527028	0.598174	0.878223	ENSG00000005486.17	RHBDD2
54.9294	0.218414	0.294956	0.7405	0.458997	0.80259	ENSG00000005513.10	SOX8
1504.82	-0.201398	0.0664638	-3.0302	0.00244396	0.0240589	ENSG00000005700.15	IBTK
440.335	0.0533406	0.110222	0.483938	0.62843	0.889085	ENSG00000005801.18	ZNF195
856.278	-0.379628	0.0899154	-4.22206	2.42082e-05	0.000472112	ENSG00000005810.18	MYCBP2
536.65	0.0232937	0.106242	0.21925	0.826455	0.956907	ENSG00000005812.11	FBXL3
0.353545	0.18064	3.77969	0.0477923	0.961882	NA	ENSG00000005844.17	ITGAL
74.2529	0.118255	0.247686	0.477439	0.63305	0.890382	ENSG00000005882.11	PDK2
1316.6	-0.146664	0.0676486	-2.16803	0.0301565	0.16525	ENSG00000005884.18	ITGA3
1055.33	-0.0711683	0.0769717	-0.924603	0.355172	0.726495	ENSG00000005889.15	ZFX
1778.86	-0.0714604	0.0602108	-1.18684	0.235292	0.599553	ENSG00000005893.15	LAMP2
0.950865	0.202635	2.39298	0.0846793	0.932516	NA	ENSG00000005961.18	ITGA2B
0.657077	1.61555	2.77056	0.583113	0.559817	NA	ENSG00000005981.13	ASB4
893.766	0.0705337	0.0773382	0.912017	0.36176	0.732597	ENSG00000006007.12	GDE1
164.717	0.209631	0.174987	1.19798	0.230924	0.594159	ENSG00000006015.17	REX1BD
114.451	0.0336962	0.215723	0.156201	0.875874	0.97053	ENSG00000006016.11	CRLF1
12.1904	0.164502	0.635484	0.25886	0.795743	0.947508	ENSG00000006025.12	OSBPL7
0.353545	0.18064	3.77969	0.0477923	0.961882	NA	ENSG00000006047.13	YBX2
374.221	-0.322806	0.116537	-2.76999	0.00560587	0.0472432	ENSG00000006062.16	MAP3K14
0.823642	-0.439037	2.39966	-0.182958	0.854831	NA	ENSG00000006071.13	ABCC8
89.6391	0.0750862	0.232567	0.322859	0.746802	0.931278	ENSG00000006118.14	TMEM132A
9473.37	-0.112752	0.031312	-3.60092	0.000317089	0.00436176	ENSG00000006125.18	AP2B1
504.032	0.310325	0.101702	3.05132	0.00227834	0.0228049	ENSG00000006194.10	ZNF263
653.223	0.0282982	0.0873732	0.323877	0.746031	0.931171	ENSG00000006282.21	SPATA20
0.352143	0.18064	3.78534	0.0477211	0.961939	NA	ENSG00000006283.18	CACNA1G
728.465	0.0918595	0.0850505	1.08006	0.280116	0.654377	ENSG00000006327.13	TNFRSF12A
2.53492	-1.00388	1.55316	-0.646349	0.518053	NA	ENSG00000006377.11	DLX6
54.5625	-0.444159	0.312139	-1.42296	0.154749	0.476729	ENSG00000006432.15	MAP3K9
1202.51	-0.108109	0.0706699	-1.52978	0.126071	0.425145	ENSG00000006451.8	RALA
384.598	-0.13951	0.111559	-1.25055	0.2111	0.56782	ENSG00000006453.14	BAIAP2L1
257.529	-0.472196	0.148234	-3.18547	0.00144518	0.0155148	ENSG00000006459.11	KDM7A
273.406	-0.206322	0.130784	-1.57758	0.114662	0.403742	ENSG00000006468.14	ETV1
1199.32	0.0117577	0.0662079	0.177587	0.859047	0.968	ENSG00000006530.17	AGK
151.007	0.0552708	0.17904	0.308706	0.757545	0.933652	ENSG00000006534.16	ALDH3B1
2498.83	-0.0904345	0.0586138	-1.54289	0.122858	0.419589	ENSG00000006576.16	PHTF2
1107.44	-0.255324	0.0725808	-3.51779	0.000435149	0.00568239	ENSG00000006607.14	FARP2
1487.88	0.159954	0.0616695	2.59372	0.00949427	0.0700464	ENSG00000006625.18	GGCT
2022.69	-0.0491105	0.0591898	-0.829712	0.406701	0.765211	ENSG00000006634.8	DBF4
23.8198	0.158265	0.477595	0.33138	0.740357	0.92947	ENSG00000006638.11	TBXA2R
1326.66	0.841232	0.0670538	12.5456	4.20113e-36	1.309e-33	ENSG00000006652.14	IFRD1
283.47	0.0456864	0.129232	0.353523	0.723696	0.923906	ENSG00000006695.11	COX10
327.615	-0.11205	0.127038	-0.882018	0.377767	0.745017	ENSG00000006704.10	GTF2IRD1
649.318	0.0701537	0.0863311	0.812612	0.416441	0.771965	ENSG00000006712.15	PAF1
1313.25	-0.165245	0.0640063	-2.58169	0.00983172	0.0719025	ENSG00000006715.16	VPS41
49.8604	-0.053435	0.305325	-0.17501	0.861072	0.968377	ENSG00000006740.17	ARHGAP44
1875.26	-0.000808907	0.0589247	-0.0137278	0.989047	0.99656	ENSG00000006744.19	ELAC2
482.74	-0.0380287	0.0997107	-0.38139	0.702914	0.9146	ENSG00000006756.16	ARSD
2466.92	0.124967	0.0498678	2.50597	0.0122115	0.0845702	ENSG00000006831.10	ADIPOR2
45.5074	0.574653	0.319093	1.80089	0.0717198	0.300752	ENSG00000006837.12	CDKL3
335.096	-0.110549	0.119858	-0.922337	0.356353	0.727565	ENSG00000007047.15	MARK4
698.192	0.0564401	0.0845876	0.667239	0.50462	0.832328	ENSG00000007080.11	CCDC124
3125.27	-0.118018	0.0455745	-2.58956	0.00960992	0.0706661	ENSG00000007168.13	PAFAH1B1
0.64003	0.0819036	2.81568	0.0290884	0.976794	NA	ENSG00000007171.17	NOS2
3596.21	-0.260419	0.0453984	-5.73631	9.67629e-09	4.12876e-07	ENSG00000007202.15	KIAA0100
23.4509	-0.355134	0.456353	-0.7782	0.436451	0.787849	ENSG00000007237.18	GAS7
136.437	0.200663	0.185602	1.08115	0.279632	0.653741	ENSG00000007255.10	TRAPPC6A
24.1414	0.149816	0.434685	0.344654	0.730355	0.926613	ENSG00000007264.15	MATK
254.039	0.104576	0.148142	0.705916	0.48024	0.817211	ENSG00000007341.19	ST7L
383.787	0.0768975	0.116475	0.660207	0.509121	0.83518	ENSG00000007372.22	PAX6
223.883	-0.180052	0.142922	-1.25979	0.207745	0.563663	ENSG00000007376.8	RPUSD1
76.0045	0.277177	0.255262	1.08585	0.277545	0.65192	ENSG00000007384.15	RHBDF1
324	0.0258541	0.119946	0.215547	0.829341	0.957509	ENSG00000007392.16	LUC7L
12.9541	-0.70572	0.600915	-1.17441	0.240232	0.605901	ENSG00000007402.11	CACNA2D2
42.7544	-0.0351059	0.327192	-0.107295	0.914555	0.979452	ENSG00000007516.13	BAIAP3
379.934	0.0340729	0.117576	0.289795	0.771973	0.938813	ENSG00000007520.4	TSR3
161.896	0.151883	0.173129	0.877282	0.380334	0.746814	ENSG00000007541.16	PIGQ
144.762	-0.205285	0.192279	-1.06764	0.285682	0.658824	ENSG00000007545.15	CRAMP1
130.406	0.107172	0.188135	0.569657	0.56891	0.863519	ENSG00000007866.21	TEAD3
1192.63	-0.0176217	0.0652446	-0.270087	0.787093	0.944089	ENSG00000007923.16	DNAJC11
332.108	1.57985	0.126009	12.5376	4.64904e-36	1.41563e-33	ENSG00000007944.15	MYLIP
4.52855	-0.639726	1.00684	-0.635377	0.525183	NA	ENSG00000007952.18	NOX1
174.381	-0.156792	0.163267	-0.960338	0.336885	0.710561	ENSG00000007968.7	E2F2
4775.93	0.160291	0.0435405	3.68142	0.000231937	0.00336819	ENSG00000008018.9	PSMB1
3.78152	-0.200484	1.07305	-0.186836	0.851789	NA	ENSG00000008056.14	SYN1
178.472	-0.222316	0.162177	-1.37083	0.17043	0.504065	ENSG00000008083.14	JARID2
81.0304	-0.0306384	0.237781	-0.128851	0.897475	0.976718	ENSG00000008086.11	CDKL5
7.09948	0.881033	0.794379	1.10908	0.267394	NA	ENSG00000008118.10	CAMK1G
498.336	0.110759	0.101121	1.09531	0.273382	0.647248	ENSG00000008128.23	CDK11A
1120.83	0.00130245	0.0683765	0.0190483	0.984803	0.995363	ENSG00000008130.15	NADK
1.12614	-0.182578	1.99934	-0.0913192	0.927239	NA	ENSG00000008226.19	DLEC1
496.683	-0.100953	0.105696	-0.955128	0.339513	0.713389	ENSG00000008256.16	CYTH3
432.388	-0.188217	0.110002	-1.71103	0.0870749	0.340522	ENSG00000008277.14	ADAM22
2310.04	0.0506652	0.0536425	0.944497	0.344916	0.71802	ENSG00000008282.8	SYPL1
495.689	0.0515481	0.100018	0.515389	0.606281	0.881588	ENSG00000008283.16	CYB561
4420.64	-0.15103	0.0391766	-3.85511	0.000115676	0.00184723	ENSG00000008294.21	SPAG9
38.9066	0.164792	0.36488	0.451632	0.651534	0.896104	ENSG00000008300.17	CELSR3
0.538841	1.1302	3.22697	0.350234	0.726163	NA	ENSG00000008311.15	AASS
9.84642	-0.317911	0.674825	-0.471101	0.637569	NA	ENSG00000008323.15	PLEKHG6
306.506	0.255317	0.124033	2.05846	0.0395457	0.201611	ENSG00000008324.11	SS18L2
37.2488	-0.34814	0.368698	-0.944242	0.345046	0.71818	ENSG00000008382.15	MPND
1459.49	0.157131	0.067236	2.337	0.0194392	0.120521	ENSG00000008394.13	MGST1
620.565	-0.0219036	0.0929684	-0.235603	0.813741	0.953099	ENSG00000008405.12	CRY1
0.484519	-0.750252	3.11101	-0.24116	0.809431	NA	ENSG00000008438.5	PGLYRP1
474.635	-0.285137	0.104129	-2.7383	0.00617577	0.0506839	ENSG00000008441.16	NFIX
3.06449	-0.978756	1.27883	-0.765353	0.444061	NA	ENSG00000008513.16	ST3GAL1
1.46068	-0.813745	1.81892	-0.447378	0.654602	NA	ENSG00000008516.17	MMP25
4.75362	-0.0903584	1.11796	-0.0808245	0.935582	NA	ENSG00000008517.16	IL32
240.951	0.0656632	0.170366	0.385424	0.699923	0.913942	ENSG00000008710.19	PKD1
44.514	0.0858281	0.320033	0.268185	0.788557	0.945136	ENSG00000008735.14	MAPK8IP2
596.53	-0.134429	0.101178	-1.32864	0.183965	0.528031	ENSG00000008838.20	MED24
297.862	-0.045702	0.130479	-0.350262	0.726142	0.924951	ENSG00000008853.16	RHOBTB2
573.589	-0.264155	0.0948328	-2.78548	0.00534489	0.045612	ENSG00000008869.12	HEATR5B
3632.72	-0.0325614	0.0560306	-0.581136	0.561149	0.861181	ENSG00000008952.17	SEC62
12693.5	0.205479	0.0356634	5.7616	8.33204e-09	3.58948e-07	ENSG00000008988.9	RPS20
14672.5	-0.0487352	0.0355639	-1.37036	0.170576	0.504317	ENSG00000009307.16	CSDE1
3988.89	-0.129852	0.0412803	-3.14561	0.00165742	0.017403	ENSG00000009335.18	UBE3C
973.2	-0.320114	0.0758518	-4.22025	2.44029e-05	0.000474528	ENSG00000009413.15	REV3L
31.948	0.806475	0.391107	2.06203	0.0392048	0.200434	ENSG00000009724.16	MASP2
142.554	0.158738	0.190374	0.83382	0.404382	0.763732	ENSG00000009780.15	FAM76A
1.78144	-0.0987395	1.62073	-0.060923	0.951421	NA	ENSG00000009790.15	TRAF3IP3
186.802	0.00537782	0.158014	0.0340339	0.97285	0.991385	ENSG00000009830.11	POMT2
1621.9	0.0226876	0.0651973	0.347983	0.727853	0.925852	ENSG00000009844.16	VTA1
25.715	0.0318535	0.420509	0.07575	0.939618	0.983671	ENSG00000009950.16	MLXIPL
4628.68	-0.26559	0.0430478	-6.16966	6.8438e-10	3.59581e-08	ENSG00000009954.11	BAZ1B
848.201	-0.0729221	0.0764148	-0.954292	0.339936	0.713506	ENSG00000010017.13	RANBP9
398.446	-0.108345	0.109355	-0.99077	0.321798	0.69668	ENSG00000010072.16	SPRTN
761.908	-0.119571	0.082305	-1.45278	0.146284	0.461414	ENSG00000010165.20	EEF1AKNMT
243.988	0.137579	0.142322	0.966677	0.333706	0.707498	ENSG00000010219.13	DYRK4
4861.23	0.000126331	0.0413007	0.00305882	0.997559	0.9991	ENSG00000010244.18	ZNF207
1457.07	0.107267	0.0615328	1.74325	0.0812892	0.326179	ENSG00000010256.11	UQCRC1
1218.89	0.0744691	0.0687877	1.08259	0.278989	0.653382	ENSG00000010270.13	STARD3NL
1591.21	-0.00790146	0.062543	-0.126336	0.899466	0.977131	ENSG00000010278.14	CD9
5473.12	-0.194956	0.043779	-4.45319	8.46041e-06	0.00018736	ENSG00000010292.13	NCAPD2
3.84428	0.581744	1.07285	0.542242	0.587652	NA	ENSG00000010295.19	IFFO1
34.8099	0.0997024	0.373998	0.266585	0.789788	0.945206	ENSG00000010310.9	GIPR
174.095	0.0586876	0.165328	0.354976	0.722608	0.923232	ENSG00000010318.21	PHF7
20.552	0.833327	0.488374	1.70633	0.0879472	0.342335	ENSG00000010319.6	SEMA3G
426.328	0.0365955	0.114366	0.319986	0.748979	0.931305	ENSG00000010322.16	NISCH
0.347739	2.01672	3.76106	0.536211	0.591813	NA	ENSG00000010327.10	STAB1
159.506	0.0846372	0.178751	0.473492	0.635862	0.891232	ENSG00000010361.13	FUZ
2.34136	0.559332	1.46468	0.38188	0.70255	NA	ENSG00000010379.16	SLC6A13
450.257	-0.116287	0.109148	-1.06541	0.286692	0.659756	ENSG00000010404.18	IDS
264.601	0.170968	0.135153	1.265	0.205872	0.560738	ENSG00000010539.11	ZNF200
3.82423	-0.22207	1.0814	-0.205354	0.837296	NA	ENSG00000010610.10	CD4
59.7685	0.0184663	0.277178	0.0666225	0.946882	0.985019	ENSG00000010626.15	LRRC23
617.182	-0.0444439	0.0898976	-0.494384	0.621035	0.885361	ENSG00000010704.18	HFE
390.809	-0.117645	0.111608	-1.0541	0.291839	0.665079	ENSG00000010803.16	SCMH1
7.13812	-0.504838	0.799941	-0.631094	0.527979	NA	ENSG00000010810.17	FYN
25.5068	-0.299565	0.432794	-0.692165	0.488834	0.82229	ENSG00000010818.10	HIVEP2
0.339123	0.18064	3.83948	0.047048	0.962475	NA	ENSG00000010932.17	FMO1
1664.89	-0.153517	0.0574179	-2.67368	0.00750239	0.0585763	ENSG00000011007.12	ELOA
556.199	0.0547664	0.0931173	0.588144	0.556436	0.859159	ENSG00000011009.11	LYPLA2
118.213	0.114434	0.198962	0.575154	0.565187	0.862202	ENSG00000011021.23	CLCN6
269.483	-0.0961579	0.134976	-0.712409	0.476211	0.81524	ENSG00000011028.14	MRC2
1752.77	0.265804	0.0740054	3.59169	0.000328544	0.00448709	ENSG00000011052.21	NME1-NME2
404.54	-0.023498	0.112483	-0.208903	0.834524	0.960055	ENSG00000011105.14	TSPAN9
354.801	-0.338777	0.118398	-2.86133	0.00421869	0.0376813	ENSG00000011114.15	BTBD7
165.808	0.125634	0.168404	0.746025	0.455652	0.799375	ENSG00000011132.12	APBA3
146.651	0.0606131	0.177544	0.341397	0.732805	0.92755	ENSG00000011143.16	MKS1
314.543	0.176297	0.12556	1.40409	0.160291	0.485831	ENSG00000011198.9	ABHD5
479.925	0.184302	0.102218	1.80302	0.0713843	0.299952	ENSG00000011243.18	AKAP8L
435.593	0.00441981	0.108677	0.0406693	0.96756	0.990153	ENSG00000011258.16	MBTD1
1988.68	-0.00320043	0.0550619	-0.0581242	0.95365	0.986184	ENSG00000011260.14	UTP18
970.693	-0.293792	0.0779891	-3.76709	0.000165161	0.00252031	ENSG00000011275.18	RNF216
865.034	0.0971695	0.0772914	1.25718	0.208687	0.564871	ENSG00000011295.16	TTC19
4769.03	-0.0504362	0.0395268	-1.276	0.201955	0.55424	ENSG00000011304.20	PTBP1
38.3134	-0.229268	0.352325	-0.650727	0.515223	0.836464	ENSG00000011332.19	DPF1
42.1792	-0.0564532	0.335677	-0.168177	0.866444	0.969456	ENSG00000011347.9	SYT7
421.556	-0.0853367	0.108358	-0.787541	0.430965	0.785054	ENSG00000011376.11	LARS2
1813.8	-0.228342	0.062678	-3.64311	0.000269368	0.00381501	ENSG00000011405.13	PIK3C2A
264.782	0.0516307	0.142138	0.363244	0.716423	0.920536	ENSG00000011422.12	PLAUR
16627.9	-0.212888	0.0362967	-5.86521	4.48562e-09	2.02352e-07	ENSG00000011426.11	ANLN
444.209	-0.0331484	0.107131	-0.309421	0.757002	0.933652	ENSG00000011451.19	WIZ
1022.49	-0.202334	0.0727644	-2.78068	0.00542455	0.0461156	ENSG00000011454.17	RABGAP1
286.835	0.0372595	0.126839	0.293755	0.768945	0.937659	ENSG00000011478.12	QPCTL
1052.65	-0.0685531	0.0729127	-0.940209	0.347111	0.72024	ENSG00000011485.14	PPP5C
188.674	-0.077453	0.155596	-0.497781	0.618638	0.884817	ENSG00000011523.14	CEP68
455.988	-0.184041	0.107773	-1.70768	0.0876958	0.341952	ENSG00000011566.15	MAP4K3
3.95448	-1.20761	1.18194	-1.02172	0.306914	NA	ENSG00000011590.14	ZBTB32
67.4784	0.220252	0.262475	0.839137	0.401393	0.761759	ENSG00000011638.10	TMEM159
1357.96	-0.298423	0.0625157	-4.77357	1.80992e-06	4.75476e-05	ENSG00000012048.22	BRCA1
2555.56	0.0142634	0.0528755	0.269755	0.787349	0.944311	ENSG00000012061.15	ERCC1
16.7081	-0.30327	0.523329	-0.579502	0.562251	0.861575	ENSG00000012124.17	CD22
28.5364	-0.0298975	0.400506	-0.0746491	0.940494	0.983671	ENSG00000012171.19	SEMA3B
1869.5	-0.0992416	0.0574714	-1.7268	0.0842034	0.33338	ENSG00000012174.12	MBTPS2
62.3073	-0.393678	0.274223	-1.43561	0.151113	0.470839	ENSG00000012211.13	PRICKLE3
550.419	-0.238125	0.0978942	-2.43247	0.014996	0.0996612	ENSG00000012232.8	EXTL3
4520.27	0.0977679	0.0467716	2.09033	0.0365884	0.190892	ENSG00000012660.14	ELOVL5
183.723	-0.00965735	0.161928	-0.0596397	0.952443	0.985917	ENSG00000012822.16	CALCOCO1
1114.18	-0.100254	0.071263	-1.40682	0.159482	0.484306	ENSG00000012963.15	UBR7
829.771	-0.187453	0.0894019	-2.09674	0.0360163	0.189012	ENSG00000012983.11	MAP4K5
2.26087	0.901996	1.50488	0.599379	0.54892	NA	ENSG00000013016.16	EHD3
2279.89	0.18477	0.0516251	3.57908	0.000344811	0.00465234	ENSG00000013275.7	PSMC4
152.933	0.00600684	0.175013	0.0343223	0.97262	0.991385	ENSG00000013288.8	MAN2B2
1288.45	-0.123836	0.0679047	-1.82368	0.0682012	0.291656	ENSG00000013297.11	CLDN11
1595.64	0.0598219	0.0625999	0.955622	0.339263	0.713025	ENSG00000013306.16	SLC25A39
692.163	-0.0092767	0.0851569	-0.108937	0.913253	0.979452	ENSG00000013364.19	MVP
1279.59	-0.0184017	0.0658329	-0.279521	0.779845	0.942143	ENSG00000013374.16	NUB1
898.798	-0.101785	0.0816076	-1.24725	0.212306	0.569122	ENSG00000013375.16	PGM3
43.2044	-0.23116	0.334822	-0.690397	0.489945	0.822842	ENSG00000013392.8	RWDD2A
1063.7	0.45169	0.0726164	6.22022	4.96465e-10	2.70392e-08	ENSG00000013441.16	CLK1
356.078	-0.140663	0.119596	-1.17615	0.239533	0.604907	ENSG00000013503.10	POLR3B
210.901	-0.320986	0.15165	-2.11663	0.0342913	0.182171	ENSG00000013523.9	ANGEL1
1781.91	-0.0103488	0.0613439	-0.168701	0.866032	0.969348	ENSG00000013561.18	RNF14
356.83	0.237186	0.117783	2.01375	0.0440357	0.216993	ENSG00000013563.14	DNASE1L1
668.911	0.0712503	0.0905868	0.786543	0.43155	0.785183	ENSG00000013573.17	DDX11
559.8	-0.0597273	0.0955654	-0.624988	0.531979	0.845888	ENSG00000013583.10	HEBP1
8162.22	0.0233528	0.105222	0.221938	0.824362	0.956595	ENSG00000013588.8	GPRC5A
1.44129	-0.787304	1.75089	-0.449659	0.652956	NA	ENSG00000013619.14	MAMLD1
1617.77	-0.0707528	0.063048	-1.12221	0.261775	0.632068	ENSG00000013810.19	TACC3
864.804	-0.197431	0.0795185	-2.48283	0.0130345	0.088828	ENSG00000014123.10	UFL1
699.575	0.0560057	0.0853231	0.656396	0.511569	0.83642	ENSG00000014138.9	POLA2
153.121	-0.279789	0.174341	-1.60483	0.10853	0.390989	ENSG00000014164.7	ZC3H3
1346.88	0.0233832	0.0648047	0.360825	0.71823	0.92122	ENSG00000014216.15	CAPN1
3909.75	0.0934744	0.0482858	1.93586	0.0528853	0.245771	ENSG00000014641.18	MDH1
1515.07	-0.0635559	0.0673271	-0.943987	0.345176	0.71834	ENSG00000014824.14	SLC30A9
63.7068	0.23315	0.274924	0.848053	0.396409	0.758223	ENSG00000014914.21	MTMR11
1137.32	-0.00270769	0.0678672	-0.0398969	0.968175	0.990163	ENSG00000014919.12	COX15
102.243	-0.0187755	0.214513	-0.0875261	0.930253	0.98253	ENSG00000015133.19	CCDC88C
184.172	-0.090661	0.157965	-0.573932	0.566014	0.862202	ENSG00000015153.14	YAF2
1667.11	-0.127733	0.0721272	-1.77094	0.0765711	0.313036	ENSG00000015171.19	ZMYND11
16.1746	-0.172398	0.526763	-0.327279	0.743457	0.930156	ENSG00000015285.10	WAS
1045.08	0.15288	0.0755602	2.02329	0.0430433	0.214146	ENSG00000015475.18	BID
8194.98	-0.024615	0.0525496	-0.468415	0.639488	0.89234	ENSG00000015479.18	MATR3
0.654266	-1.30149	2.60968	-0.498716	0.61798	NA	ENSG00000015520.14	NPC1L1
257.222	0.018836	0.136592	0.1379	0.89032	0.975281	ENSG00000015532.9	XYLT2
28.569	-0.552053	0.427692	-1.29077	0.196783	0.546537	ENSG00000015568.13	RGPD5
1465.1	-0.125553	0.0626274	-2.00477	0.044988	0.220223	ENSG00000015676.18	NUDCD3
337.96	-0.178031	0.120169	-1.48151	0.13847	0.447473	ENSG00000016391.11	CHDH
468.258	0.234013	0.105623	2.21554	0.0267231	0.151903	ENSG00000016864.18	GLT8D1
2395.17	-0.107281	0.0516091	-2.07872	0.0376435	0.194879	ENSG00000017260.19	ATP2C1
1.34685	0.840842	1.86546	0.450743	0.652175	NA	ENSG00000017483.15	SLC38A5
2759.75	-0.0551329	0.0505251	-1.0912	0.275186	0.649223	ENSG00000017797.13	RALBP1
246.38	-0.128704	0.136958	-0.939733	0.347355	0.720523	ENSG00000018189.13	RUFY3
3.11817	-0.248186	1.22709	-0.202256	0.839717	NA	ENSG00000018280.17	SLC11A1
3823.64	-0.320736	0.0434132	-7.38799	1.4907e-13	1.2253e-11	ENSG00000018408.14	WWTR1
1689.71	-0.207598	0.0604763	-3.43272	0.000597561	0.00735857	ENSG00000018510.15	AGPS
885.686	0.120898	0.0765482	1.57937	0.114251	0.402932	ENSG00000018610.14	CXorf56
740.636	0.0116822	0.0872637	0.133872	0.893504	0.975964	ENSG00000018699.13	TTC27
6.04393	-0.213935	0.869257	-0.246113	0.805595	NA	ENSG00000018869.16	ZNF582
1.49243	-0.782186	1.76266	-0.443754	0.657221	NA	ENSG00000019102.12	VSIG2
300.282	0.118096	0.137287	0.860212	0.389672	0.753077	ENSG00000019144.19	PHLDB1
78.3421	0.219681	0.240171	0.914688	0.360356	0.73119	ENSG00000019485.13	PRDM11
12.0734	0.290451	0.616998	0.470748	0.637821	0.891767	ENSG00000019549.12	SNAI2
3.76023	0.401121	1.14635	0.349912	0.726405	NA	ENSG00000019582.15	CD74
514.633	-0.142738	0.102796	-1.38856	0.164966	0.494267	ENSG00000019995.6	ZRANB1
461.443	0.10987	0.104922	1.04716	0.295026	0.669618	ENSG00000020129.16	NCDN
20.7613	-0.319592	0.508901	-0.628005	0.530001	0.844949	ENSG00000020181.17	ADGRA2
0.347739	2.01672	3.76106	0.536211	0.591813	NA	ENSG00000020219.9	CCT8L1P
110.289	-0.28578	0.208567	-1.37021	0.170622	0.504317	ENSG00000020256.20	ZFP64
804.436	0.110715	0.0834519	1.32669	0.18461	0.528844	ENSG00000020426.11	MNAT1
196.167	-0.481594	0.159121	-3.02658	0.00247337	0.024277	ENSG00000020577.13	SAMD4A
1080.19	-0.172863	0.0745928	-2.31743	0.0204806	0.125125	ENSG00000020922.12	MRE11
2.68132	0.888594	1.36027	0.65325	0.513595	NA	ENSG00000021300.14	PLEKHB1
841.779	-0.0505004	0.0771056	-0.654951	0.512499	0.836464	ENSG00000021355.13	SERPINB1
1.46264	-0.811963	1.72071	-0.471877	0.637015	NA	ENSG00000021488.13	SLC7A9
548.277	-0.180755	0.105673	-1.71051	0.0871709	0.340699	ENSG00000021574.12	SPAST
161.168	0.0710921	0.177759	0.399935	0.689204	0.910472	ENSG00000021762.20	OSBPL5
1701.19	-0.263328	0.0603695	-4.36194	1.28914e-05	0.000272232	ENSG00000021776.11	AQR
312.225	-0.0681139	0.123103	-0.553307	0.580053	0.868662	ENSG00000021826.15	CPS1
99.0133	0.198605	0.217123	0.91471	0.360344	0.73119	ENSG00000022267.17	FHL1
1825.89	0.0797912	0.0578356	1.37962	0.167703	0.499239	ENSG00000022277.12	RTF2
0.553085	2.67427	3.12867	0.854761	0.392683	NA	ENSG00000022556.16	NLRP2
139.133	0.0469689	0.18398	0.255294	0.798496	0.948679	ENSG00000022567.9	SLC45A4
1650.43	0.0682011	0.0611762	1.11483	0.264923	0.635986	ENSG00000022840.16	RNF10
167.639	-0.136075	0.171619	-0.79289	0.427842	0.783053	ENSG00000022976.15	ZNF839
624.364	0.0256482	0.0958825	0.267496	0.789087	0.945206	ENSG00000023041.11	ZDHHC6
372.853	-0.368332	0.114952	-3.20422	0.00135429	0.0146565	ENSG00000023171.18	GRAMD1B
1540.61	0.0402189	0.0602684	0.667329	0.504562	0.832328	ENSG00000023191.17	RNH1
3332.92	-0.165283	0.0433115	-3.81614	0.000135556	0.00212171	ENSG00000023228.14	NDUFS1
2506.04	-0.226056	0.0562643	-4.01776	5.87547e-05	0.00104126	ENSG00000023287.13	RB1CC1
1243.17	0.0984882	0.0658258	1.49619	0.134603	0.44158	ENSG00000023318.8	ERP44
1147.03	0.0981004	0.067899	1.4448	0.148514	0.465123	ENSG00000023330.15	ALAS1
619.437	-0.687725	0.0965854	-7.12038	1.07627e-12	8.14678e-11	ENSG00000023445.14	BIRC3
883.659	-0.36056	0.0788002	-4.57562	4.74807e-06	0.000111801	ENSG00000023516.9	AKAP11
652.265	0.0519311	0.0861778	0.602604	0.546772	0.854722	ENSG00000023572.9	GLRX2
572.054	0.0675728	0.108417	0.623269	0.533108	0.846048	ENSG00000023608.5	SNAPC1
1202.11	0.0406457	0.0703358	0.577881	0.563345	0.861779	ENSG00000023697.13	DERA
4715.88	0.0869032	0.0449071	1.93518	0.0529685	0.245987	ENSG00000023734.11	STRAP
797.51	-0.167723	0.0791988	-2.11775	0.0341963	0.18181	ENSG00000023839.11	ABCC2
696.735	0.017491	0.087087	0.200846	0.840819	0.96126	ENSG00000023892.11	DEF6
89.5356	-0.0871768	0.225115	-0.387255	0.698567	0.913558	ENSG00000023902.14	PLEKHO1
4236.53	-0.12729	0.0488626	-2.60506	0.00918594	0.068412	ENSG00000023909.10	GCLM
1174.52	-0.159339	0.0666284	-2.39146	0.0167814	0.108043	ENSG00000024048.10	UBR2
315.984	0.0315496	0.126951	0.248519	0.803733	0.949785	ENSG00000024422.12	EHD2
3147.13	-0.0914548	0.056858	-1.60848	0.107731	0.389236	ENSG00000024526.17	DEPDC1
298.193	0.165968	0.136053	1.21988	0.222512	0.582495	ENSG00000024862.17	CCDC28A
731.097	-0.0970124	0.0813534	-1.19248	0.233073	0.596847	ENSG00000025039.14	RRAGD
525.534	0.112526	0.102117	1.10194	0.270489	0.643211	ENSG00000025156.12	HSF2
1110.35	-0.103776	0.0695584	-1.49193	0.135718	0.444043	ENSG00000025293.17	PHF20
17.3824	0.201972	0.513641	0.393217	0.694159	0.912442	ENSG00000025423.11	HSD17B6
59.9925	-0.0770624	0.29292	-0.263083	0.792486	0.946364	ENSG00000025434.19	NR1H3
9.48829	-0.446143	0.6962	-0.640826	0.521636	NA	ENSG00000025708.14	TYMP
596.037	0.057148	0.0894177	0.639113	0.522749	0.841234	ENSG00000025770.19	NCAPH2
1061.46	0.0146547	0.072469	0.202221	0.839744	0.960794	ENSG00000025772.8	TOMM34
1801.48	-0.0325008	0.0587696	-0.55302	0.580249	0.868662	ENSG00000025796.14	SEC63
3098.79	-0.197561	0.069035	-2.86175	0.0042131	0.0376565	ENSG00000025800.14	KPNA6
48745.5	0.00480538	0.0264765	0.181496	0.855978	0.966574	ENSG00000026025.16	VIM
90.464	-0.0497809	0.275062	-0.180981	0.856382	0.966714	ENSG00000026036.22	RTEL1-TNFRSF6B
106.629	0.000314171	0.211835	0.00148309	0.998817	0.999413	ENSG00000026103.22	FAS
157.832	0.0750506	0.16932	0.443246	0.657588	0.899383	ENSG00000026297.15	RNASET2
17664.6	-0.0282628	0.0356146	-0.793573	0.427444	0.782791	ENSG00000026508.18	CD44
57.7351	0.024856	0.279316	0.0889889	0.929091	0.982397	ENSG00000026652.14	AGPAT4
51.9018	0.0344029	0.294123	0.116968	0.906886	0.979015	ENSG00000026950.17	BTN3A1
336.904	-0.126495	0.118969	-1.06326	0.287663	0.660465	ENSG00000027001.10	MIPEP
50.9398	-0.090416	0.303081	-0.298322	0.765457	0.936224	ENSG00000027075.15	PRKCH
371.241	0.147602	0.116766	1.26408	0.2062	0.561072	ENSG00000027697.14	IFNGR1
207.015	0.0308302	0.15099	0.204188	0.838207	0.960429	ENSG00000027847.14	B4GALT7
22.7798	0.060986	0.449037	0.135815	0.891968	0.975964	ENSG00000027869.11	SH2D2A
592.134	-0.0313831	0.0966489	-0.324713	0.745399	0.930914	ENSG00000028116.17	VRK2
193.8	0.0537275	0.154071	0.348721	0.727299	0.925566	ENSG00000028137.19	TNFRSF1B
1003.59	-0.0707467	0.0761926	-0.928525	0.353136	0.724772	ENSG00000028203.18	VEZT
4.25171	-0.254592	1.01583	-0.250626	0.802104	NA	ENSG00000028277.21	POU2F2
583.591	-0.0800253	0.102995	-0.776983	0.437169	0.787969	ENSG00000028310.18	BRD9
961.985	-0.166449	0.0776284	-2.14417	0.0320191	0.172911	ENSG00000028528.15	SNX1
516.055	0.159114	0.0983124	1.61845	0.105565	0.384188	ENSG00000028839.10	TBPL1
74.1787	0.164132	0.251658	0.652201	0.514271	0.836464	ENSG00000029153.14	ARNTL2
7883.04	0.0272986	0.0372928	0.732009	0.464163	0.806283	ENSG00000029363.16	BCLAF1
1247.05	0.0265307	0.0672735	0.394371	0.693307	0.911931	ENSG00000029364.12	SLC39A9
1010.93	-0.201245	0.0812488	-2.4769	0.013253	0.0899969	ENSG00000029534.20	ANK1
227.91	-0.0117799	0.152961	-0.0770122	0.938614	0.983671	ENSG00000029639.11	TFB1M
2343.96	-0.139668	0.0569693	-2.45163	0.0142211	0.0954105	ENSG00000029725.17	RABEP1
2356.85	0.0705646	0.0518458	1.36105	0.173499	0.509654	ENSG00000029993.15	HMGB3
2372.93	-0.163372	0.0507362	-3.22004	0.00128175	0.013973	ENSG00000030066.13	NUP160
531.603	0.0964723	0.0987334	0.977099	0.32852	0.703265	ENSG00000030110.13	BAK1
294.895	-0.616079	0.14003	-4.39962	1.0844e-05	0.000232834	ENSG00000030419.16	IKZF2
777.92	0.0545137	0.0823259	0.662169	0.507863	0.834173	ENSG00000030582.18	GRN
943.177	-0.0315363	0.0747596	-0.421836	0.673145	0.905138	ENSG00000031003.10	FAM13B
21.7596	-0.41638	0.468941	-0.887914	0.374587	0.741645	ENSG00000031081.10	ARHGAP31
428.551	0.106627	0.107794	0.98917	0.32258	0.697151	ENSG00000031691.7	CENPQ
2154.64	0.0651723	0.0532615	1.22363	0.221093	0.580512	ENSG00000031698.13	SARS
556.184	0.048072	0.0939706	0.511564	0.608956	0.882928	ENSG00000031823.14	RANBP3
733.297	-0.0940377	0.0893283	-1.05272	0.292469	0.665846	ENSG00000032219.18	ARID4A
590.297	-0.0550885	0.0917646	-0.600324	0.54829	0.855076	ENSG00000032389.12	EIPR1
623.607	0.084582	0.0943341	0.896622	0.369921	0.738766	ENSG00000032444.16	PNPLA6
302.298	-0.0442736	0.127624	-0.346905	0.728663	0.926045	ENSG00000032742.17	IFT88
330.217	-0.0638261	0.127685	-0.499872	0.617165	0.884817	ENSG00000033011.12	ALG1
588.168	0.271142	0.0906069	2.99251	0.00276698	0.0266819	ENSG00000033030.13	ZCCHC8
1272.4	0.0558632	0.0682936	0.817986	0.413365	0.769738	ENSG00000033050.9	ABCF2
423.208	0.0833361	0.115781	0.719771	0.471666	0.811089	ENSG00000033100.16	CHPF2
5.9038	-0.87216	0.909379	-0.959073	0.337522	NA	ENSG00000033122.19	LRRC7
421.505	0.00234555	0.10797	0.0217241	0.982668	0.994995	ENSG00000033170.16	FUT8
1609.28	-0.166412	0.0639041	-2.60409	0.00921176	0.0684901	ENSG00000033178.13	UBA6
20.6598	-0.0633729	0.470085	-0.134812	0.892761	0.975964	ENSG00000033327.13	GAB2
300.313	-0.077032	0.127923	-0.602175	0.547058	0.854722	ENSG00000033627.16	ATP6V0A1
617.22	-0.191053	0.0960907	-1.98826	0.0467833	0.226201	ENSG00000033800.13	PIAS1
705.306	-0.0980312	0.0913576	-1.07305	0.283249	0.657485	ENSG00000033867.16	SLC4A7
102.839	-0.275351	0.215187	-1.27959	0.200688	0.55178	ENSG00000034053.14	APBA2
600.8	0.0195684	0.0917622	0.213251	0.831131	0.95802	ENSG00000034152.18	MAP2K3
14521.3	0.192789	0.0327412	5.88829	3.90224e-09	1.79048e-07	ENSG00000034510.6	TMSB10
96.0358	-0.100541	0.21784	-0.461537	0.644413	0.894143	ENSG00000034533.11	ASTE1
464.009	0.0192901	0.104432	0.184715	0.853453	0.965475	ENSG00000034677.13	RNF19A
576.371	-0.00154917	0.0940586	-0.0164702	0.986859	0.996015	ENSG00000034693.15	PEX3
1020.34	0.0648227	0.0720073	0.900224	0.368001	0.737544	ENSG00000034713.8	GABARAPL2
84.7036	0.103511	0.23452	0.441375	0.658941	0.900086	ENSG00000035115.21	SH3YL1
2492.92	0.0973148	0.0557879	1.74437	0.0810946	0.325691	ENSG00000035141.8	FAM136A
7431.51	0.0228595	0.0335381	0.681597	0.495494	0.826522	ENSG00000035403.17	VCL
1090.68	-0.0508556	0.0719277	-0.707037	0.479543	0.817211	ENSG00000035499.13	DEPDC1B
6.29011	0.472967	0.860176	0.549849	0.582423	NA	ENSG00000035664.11	DAPK2
1177.37	-0.0688292	0.0669133	-1.02863	0.303653	0.679879	ENSG00000035681.9	NSMAF
1626.52	0.0222544	0.0600493	0.370602	0.710934	0.918227	ENSG00000035687.10	ADSS
0.347739	2.01672	3.76106	0.536211	0.591813	NA	ENSG00000035720.8	STAP1
2679.36	-0.0196334	0.0472184	-0.4158	0.677556	0.907336	ENSG00000035862.12	TIMP2
2367.71	-0.180334	0.0549359	-3.28261	0.00102849	0.0115505	ENSG00000035928.16	RFC1
1190.74	-0.100132	0.0749247	-1.33643	0.181408	0.523929	ENSG00000036054.13	TBC1D23
2220.25	-0.183723	0.0523135	-3.51197	0.000444801	0.00577466	ENSG00000036257.13	CUL3
0.821018	-1.77861	2.57105	-0.691783	0.489074	NA	ENSG00000036530.8	CYP46A1
1135.72	-0.135406	0.0680522	-1.98974	0.0466194	0.225663	ENSG00000036549.13	AC118549.1
31.9284	0.495442	0.38205	1.2968	0.194701	0.5438	ENSG00000036672.16	USP2
116.317	-0.129638	0.208162	-0.622773	0.533433	0.846092	ENSG00000037042.9	TUBG2
1092.37	0.1193	0.0710026	1.68022	0.0929146	0.354866	ENSG00000037241.7	RPL26L1
0.36919	2.09053	3.6756	0.568758	0.56952	NA	ENSG00000037280.16	FLT4
2410.14	-0.00985548	0.0500253	-0.19701	0.84382	0.962004	ENSG00000037474.15	NSUN2
371.102	-0.217718	0.114386	-1.90336	0.0569936	0.258497	ENSG00000037637.11	FBXO42
404.623	0.106308	0.109339	0.972274	0.330914	0.705791	ENSG00000037749.12	MFAP3
444.803	-0.00942106	0.105234	-0.0895249	0.928665	0.98238	ENSG00000037757.14	MRI1
127.805	0.0701964	0.191705	0.366168	0.71424	0.919691	ENSG00000037897.17	METTL1
80.9139	0.0694114	0.247214	0.280775	0.778883	0.941628	ENSG00000037965.6	HOXC8
140.257	0.137201	0.184392	0.744074	0.456832	0.800502	ENSG00000038002.9	AGA
769.729	-0.165445	0.0898709	-1.84092	0.0656338	0.284767	ENSG00000038210.13	PI4K2B
879.978	-0.225348	0.0785698	-2.86812	0.00412913	0.0370295	ENSG00000038219.13	BOD1L1
1268.06	-0.0379995	0.0763882	-0.497452	0.61887	0.884817	ENSG00000038274.17	MAT2B
1102.05	-0.0575945	0.0733776	-0.784906	0.432509	0.785831	ENSG00000038358.15	EDC4
889.845	-0.358631	0.0896311	-4.00119	6.30238e-05	0.00109947	ENSG00000038382.20	TRIO
363.43	-0.104051	0.11774	-0.883736	0.376839	0.744124	ENSG00000038427.16	VCAN
237.392	-0.236788	0.142063	-1.66678	0.0955581	0.361255	ENSG00000038532.16	CLEC16A
3211.36	-0.133145	0.0490012	-2.71717	0.00658426	0.0530782	ENSG00000039123.16	MTREX
41.3637	-0.0489149	0.332331	-0.147187	0.882984	0.9732	ENSG00000039139.9	DNAH5
1621.93	-0.189877	0.0700556	-2.71038	0.00672061	0.0539824	ENSG00000039319.17	ZFYVE16
428.745	-0.24734	0.109897	-2.25065	0.0244077	0.143176	ENSG00000039523.20	RIPOR1
48.2709	-0.265088	0.311631	-0.850649	0.394964	0.757462	ENSG00000039560.14	RAI14
0.330693	0.18064	3.87678	0.0465953	0.962836	NA	ENSG00000039600.11	SOX30
160.437	0.0769935	0.17975	0.428337	0.668406	0.902925	ENSG00000039650.12	PNKP
0.339123	0.18064	3.83948	0.047048	0.962475	NA	ENSG00000039987.6	BEST2
958.675	-0.425015	0.0832555	-5.10494	3.30892e-07	1.01681e-05	ENSG00000040199.18	PHLPP2
1555.68	-0.0155862	0.0663377	-0.234953	0.814245	0.953331	ENSG00000040275.17	SPDL1
478.187	-0.0539467	0.104066	-0.51839	0.604186	0.880645	ENSG00000040341.18	STAU2
154.694	0.062347	0.173304	0.359756	0.71903	0.921473	ENSG00000040487.13	PQLC2
130.536	0.0414012	0.191947	0.215691	0.829229	0.957509	ENSG00000040531.14	CTNS
39.6707	0.324598	0.335307	0.96806	0.333014	0.707072	ENSG00000040608.14	RTN4R
596.728	-0.217672	0.0896157	-2.42895	0.0151426	0.100337	ENSG00000040633.13	PHF23
4.98249	0.889386	1.06204	0.837429	0.402351	NA	ENSG00000040731.10	CDH10
331.661	-0.0106818	0.127448	-0.083813	0.933205	0.982598	ENSG00000040933.15	INPP4A
9801.57	-0.307327	0.0878098	-3.49991	0.000465413	0.00599001	ENSG00000041353.10	RAB27B
3596.58	0.109937	0.0492689	2.23137	0.0256566	0.147468	ENSG00000041357.16	PSMA4
4.63461	-0.762795	1.0894	-0.700196	0.483805	NA	ENSG00000041515.16	MYO16
1600.67	-0.0175723	0.058351	-0.301148	0.763302	0.935174	ENSG00000041802.11	LSG1
219.205	-0.0502166	0.146483	-0.342815	0.731737	0.927075	ENSG00000041880.14	PARP3
3.94378	0.188779	1.05688	0.17862	0.858236	NA	ENSG00000041982.16	TNC
186.307	0.318613	0.160014	1.99116	0.0464635	0.225305	ENSG00000041988.15	THAP3
3.31096	1.07293	1.2278	0.873869	0.38219	NA	ENSG00000042062.12	RIPOR3
335.434	-0.0321278	0.118566	-0.270969	0.786415	0.943952	ENSG00000042088.13	TDP1
297.057	0.136952	0.132193	1.036	0.300202	0.675734	ENSG00000042286.15	AIFM2
46.0223	0.275551	0.316879	0.869579	0.38453	0.749073	ENSG00000042317.17	SPATA7
1083.13	0.187345	0.0711024	2.63487	0.00841701	0.0642204	ENSG00000042429.12	MED17
527.263	0.347332	0.0959363	3.62044	0.000294105	0.00409607	ENSG00000042445.14	RETSAT
903.569	0.0513008	0.0819503	0.625999	0.531316	0.845636	ENSG00000042493.16	CAPG
2038.86	0.169048	0.0551058	3.0677	0.00215715	0.0217632	ENSG00000042753.11	AP2S1
0.36919	2.09053	3.6756	0.568758	0.56952	NA	ENSG00000042781.13	USH2A
0.652864	-1.30149	2.61136	-0.498395	0.618206	NA	ENSG00000042832.12	TG
525.811	-0.0244848	0.103079	-0.237533	0.812243	0.952525	ENSG00000043039.6	BARX2
1453.23	-0.0728581	0.0650839	-1.11945	0.262949	0.633403	ENSG00000043093.14	DCUN1D1
1965.29	-0.429917	0.0617303	-6.96445	3.29688e-12	2.33712e-10	ENSG00000043143.20	JADE2
52.1479	0.00854518	0.294983	0.0289684	0.97689	0.993198	ENSG00000043355.12	ZIC2
248.121	0.103066	0.14056	0.733249	0.463407	0.805636	ENSG00000043514.16	TRIT1
3.27572	0.999769	1.22417	0.81669	0.414105	NA	ENSG00000043591.5	ADRB1
396.185	-0.0923988	0.112079	-0.824411	0.409706	0.767333	ENSG00000044090.8	CUL7
4976.17	-0.0624817	0.0385507	-1.62077	0.105067	0.383254	ENSG00000044115.21	CTNNA1
811.007	-0.178211	0.0791768	-2.2508	0.024398	0.143176	ENSG00000044446.11	PHKA2
554.821	-0.0820898	0.0954875	-0.859692	0.389959	0.75316	ENSG00000044459.15	CNTLN
4.62222	-0.423006	1.00593	-0.420512	0.674111	NA	ENSG00000044524.11	EPHA3
8558.83	0.32107	0.0359416	8.93312	4.14165e-19	5.23488e-17	ENSG00000044574.8	HSPA5
265.509	-0.206895	0.132915	-1.55659	0.119567	0.412833	ENSG00000046604.13	DSG2
140.059	0.0629915	0.181837	0.346416	0.72903	0.926184	ENSG00000046647.13	GEMIN8
618.752	0.0515268	0.0933396	0.552036	0.580924	0.86894	ENSG00000046651.15	OFD1
54.9778	-0.133824	0.291982	-0.458329	0.646716	0.894651	ENSG00000046653.15	GPM6B
295.515	0.0356409	0.126217	0.282377	0.777655	0.941109	ENSG00000047056.15	WDR37
786.608	-0.341321	0.0861377	-3.9625	7.41676e-05	0.00126425	ENSG00000047188.16	YTHDC2
926.692	-0.114007	0.0776898	-1.46746	0.14225	0.455296	ENSG00000047230.15	CTPS2
765.606	0.0299064	0.0794351	0.376489	0.706554	0.916577	ENSG00000047249.18	ATP6V1H
3411.23	-0.111441	0.047347	-2.35372	0.0185867	0.116312	ENSG00000047315.16	POLR2B
141.78	0.0431694	0.181904	0.23732	0.812409	0.952525	ENSG00000047346.12	FAM214A
4499.46	-0.251733	0.0397858	-6.32721	2.49634e-10	1.40529e-08	ENSG00000047410.14	TPR
70.8123	0.0372503	0.252293	0.147647	0.882622	0.9732	ENSG00000047457.14	CP
161.827	-0.0921208	0.167863	-0.548785	0.583153	0.870344	ENSG00000047578.13	KIAA0556
147.326	0.0358217	0.18198	0.196844	0.84395	0.962004	ENSG00000047579.19	DTNBP1
1208.24	-0.0591664	0.0704476	-0.839863	0.400985	0.761502	ENSG00000047621.12	C12orf4
518.657	-0.182835	0.104071	-1.75682	0.0789479	0.319271	ENSG00000047644.18	WWC3
1.23454	-1.44131	2.08086	-0.692648	0.488531	NA	ENSG00000047662.4	FAM184B
2849.99	-0.136107	0.047523	-2.86403	0.00418288	0.0374364	ENSG00000047849.21	MAP4
771.697	-0.121636	0.0802785	-1.51517	0.129729	0.431508	ENSG00000047932.14	GOPC
761.726	-0.211698	0.0830794	-2.54814	0.0108299	0.0774272	ENSG00000048028.11	USP28
785.902	-0.3979	0.0896326	-4.43923	9.02826e-06	0.000198948	ENSG00000048052.21	HDAC9
1002.69	-0.00300464	0.0738417	-0.0406903	0.967543	0.990153	ENSG00000048140.18	TSPAN17
1520.78	0.233093	0.0661736	3.52244	0.000427589	0.00559457	ENSG00000048162.20	NOP16
97.1145	0.0849019	0.220159	0.38564	0.699763	0.913942	ENSG00000048342.16	CC2D2A
735.024	-0.068238	0.0859703	-0.793739	0.427347	0.78278	ENSG00000048392.11	RRM2B
724.364	-0.0817406	0.0885499	-0.923101	0.355954	0.727104	ENSG00000048405.10	ZNF800
102.87	-0.172833	0.216297	-0.799054	0.424259	0.778768	ENSG00000048471.14	SNX29
1991.45	0.0264668	0.05942	0.445419	0.656017	0.897982	ENSG00000048544.6	MRPS10
2275.22	-0.291974	0.0557851	-5.2339	1.65971e-07	5.50417e-06	ENSG00000048649.13	RSF1
695.113	-0.411669	0.0955429	-4.30873	1.64191e-05	0.000340006	ENSG00000048707.15	VPS13D
2714.67	-0.202464	0.049548	-4.08621	4.38468e-05	0.000804738	ENSG00000048828.17	FAM120A
1067.84	-0.172627	0.0713101	-2.42079	0.0154867	0.102212	ENSG00000048991.16	R3HDM1
11.502	0.380637	0.624249	0.609752	0.542026	NA	ENSG00000049089.15	COL9A2
0.322076	-1.71577	3.87497	-0.442784	0.657922	NA	ENSG00000049130.15	KITLG
250.315	0.00892148	0.14602	0.0610977	0.951281	0.985605	ENSG00000049167.14	ERCC8
0.330693	0.18064	3.87678	0.0465953	0.962836	NA	ENSG00000049192.15	ADAMTS6
693.805	-0.180195	0.0946432	-1.90395	0.0569173	0.258326	ENSG00000049239.12	H6PD
2910.03	0.0322294	0.0527399	0.611101	0.541132	0.851424	ENSG00000049245.13	VAMP3
463.872	-0.169769	0.107465	-1.57976	0.114161	0.40272	ENSG00000049246.14	PER3
13.2263	-0.282822	0.591344	-0.478271	0.632458	0.890344	ENSG00000049249.8	TNFRSF9
1.31575	-0.559864	1.78524	-0.313607	0.753819	NA	ENSG00000049283.18	EPN3
11.3531	0.16602	0.632198	0.262608	0.792853	NA	ENSG00000049323.16	LTBP1
3346.9	0.129119	0.0462362	2.7926	0.00522865	0.0448486	ENSG00000049449.9	RCN1
0.507372	-0.74991	3.06335	-0.244801	0.80661	NA	ENSG00000049540.17	ELN
2123.93	0.0733259	0.0532829	1.37616	0.168771	0.50104	ENSG00000049541.11	RFC2
1913.8	-0.0247456	0.0551342	-0.448825	0.653558	0.896944	ENSG00000049656.14	CLPTM1L
502.008	-0.219876	0.0974777	-2.25566	0.0240922	0.141947	ENSG00000049759.18	NEDD4L
4.30573	0.551069	1.11537	0.494069	0.621257	NA	ENSG00000049768.15	FOXP3
208.998	0.188292	0.156212	1.20536	0.228063	0.589655	ENSG00000049769.13	PPP1R3F
2561.7	0.0604673	0.0531398	1.13789	0.255166	0.625794	ENSG00000049860.14	HEXB
433.138	-0.0402445	0.10631	-0.378556	0.705017	0.915643	ENSG00000049883.15	PTCD2
651.451	0.00666468	0.093063	0.0716147	0.942909	0.984652	ENSG00000050130.18	JKAMP
3.79314	0.589968	1.12163	0.525993	0.598893	NA	ENSG00000050165.17	DKK3
1164.22	-0.19374	0.0659481	-2.93776	0.00330589	0.0308658	ENSG00000050344.9	NFE2L3
974.708	-0.0735817	0.072637	-1.01301	0.311058	0.684858	ENSG00000050393.11	MCUR1
6860.82	-0.137868	0.0420664	-3.2774	0.00104769	0.011717	ENSG00000050405.13	LIMA1
383.127	0.0542796	0.110657	0.490521	0.623765	0.886894	ENSG00000050426.16	LETMD1
40.4637	-0.0803639	0.343794	-0.233756	0.815174	0.953584	ENSG00000050438.17	SLC4A8
20.3874	0.101341	0.476733	0.212573	0.83166	0.958336	ENSG00000050555.18	LAMC3
1374.53	-0.0155845	0.0629942	-0.247395	0.804602	0.949948	ENSG00000050748.17	MAPK9
762.375	-0.0722612	0.0803193	-0.899675	0.368293	0.737798	ENSG00000050820.17	BCAR1
207.072	0.0436321	0.148626	0.293569	0.769087	0.937659	ENSG00000051009.10	FAM160A2
811.597	1.51814	0.0813762	18.6558	1.13189e-77	1.16654e-74	ENSG00000051108.15	HERPUD1
824.93	0.0354464	0.0778374	0.455391	0.648828	0.895539	ENSG00000051128.19	HOMER3
258.325	0.10249	0.137001	0.748098	0.454401	0.798614	ENSG00000051180.17	RAD51
1114.11	-0.339578	0.0733378	-4.63032	3.65096e-06	8.90994e-05	ENSG00000051341.14	POLQ
819.021	-0.315127	0.0871695	-3.61511	0.000300218	0.00416689	ENSG00000051382.8	PIK3CB
1373.4	0.170385	0.0653353	2.60786	0.00911113	0.0679683	ENSG00000051523.11	CYBA
1841.54	0.0734595	0.0557078	1.31866	0.187283	0.532936	ENSG00000051596.9	THOC3
702.019	0.115124	0.083899	1.37218	0.170009	0.503223	ENSG00000051620.11	HEBP2
997.27	-0.190402	0.0759676	-2.50636	0.012198	0.0845465	ENSG00000051825.14	MPHOSPH9
5.72317	-0.399914	0.932782	-0.428733	0.668118	NA	ENSG00000052126.14	PLEKHA5
0.300721	-1.63072	3.98052	-0.409676	0.682044	NA	ENSG00000052344.16	PRSS8
873.001	0.0125659	0.0785666	0.15994	0.872928	0.970477	ENSG00000052723.11	SIKE1
875.771	0.099913	0.0754248	1.32467	0.18528	0.530311	ENSG00000052749.13	RRP12
174.425	-0.190693	0.173151	-1.10131	0.27076	0.643585	ENSG00000052795.13	FNIP2
398.03	0.130521	0.118683	1.09974	0.271444	0.644823	ENSG00000052802.13	MSMO1
856.09	0.055571	0.0763208	0.728123	0.466538	0.808647	ENSG00000052841.15	TTC17
35.2084	-0.088459	0.361667	-0.244587	0.806776	0.950304	ENSG00000052850.7	ALX4
464.331	-0.280345	0.103249	-2.71524	0.00662287	0.0533253	ENSG00000053254.15	FOXN3
545.28	0.0407031	0.0935221	0.435224	0.663399	0.901395	ENSG00000053371.12	AKR7A2
1757.24	0.176358	0.0552796	3.19029	0.00142132	0.0153447	ENSG00000053372.5	MRTO4
5.02006	-0.223979	0.955975	-0.234294	0.814757	NA	ENSG00000053438.10	NNAT
166.004	0.12647	0.17033	0.742501	0.457784	0.801122	ENSG00000053501.13	USE1
21.4487	0.034994	0.485202	0.0721225	0.942504	0.984625	ENSG00000053524.12	MCF2L2
12.562	0.0742033	0.613035	0.121043	0.903657	0.977931	ENSG00000053702.15	NRIP2
6.30781	0.345653	0.858173	0.402778	0.687111	NA	ENSG00000053747.16	LAMA3
334.793	-0.180346	0.121892	-1.47955	0.138992	0.448944	ENSG00000053770.12	AP5M1
425.635	-0.0918223	0.107896	-0.851027	0.394754	0.757462	ENSG00000053900.10	ANAPC4
102.35	0.00025513	0.215184	0.00118564	0.999054	0.999576	ENSG00000053918.16	KCNQ1
1358.16	0.0358349	0.0630549	0.568313	0.569822	0.863824	ENSG00000054116.12	TRAPPC3
3974.55	-0.0513426	0.0481971	-1.06526	0.286756	0.659791	ENSG00000054118.15	THRAP3
414.146	0.15815	0.111392	1.41977	0.155675	0.478059	ENSG00000054148.17	PHPT1
0.339123	0.18064	3.83948	0.047048	0.962475	NA	ENSG00000054179.12	ENTPD2
1005.73	-0.20229	0.0790368	-2.55944	0.0104842	0.0754386	ENSG00000054267.22	ARID4B
10.7879	-0.349794	0.705905	-0.495525	0.620229	NA	ENSG00000054277.14	OPN3
599.784	-0.0293376	0.0917343	-0.319811	0.749112	0.931305	ENSG00000054282.16	SDCCAG8
0.330693	0.18064	3.87678	0.0465953	0.962836	NA	ENSG00000054356.14	PTPRN
13.2309	-0.197286	0.609719	-0.323568	0.746265	0.931171	ENSG00000054392.13	HHAT
1400.95	-0.324415	0.0640698	-5.06347	4.11699e-07	1.23954e-05	ENSG00000054523.17	KIF1B
164.713	0.944799	0.178423	5.29529	1.1883e-07	4.12598e-06	ENSG00000054598.8	FOXC1
196.835	-0.184505	0.158251	-1.16591	0.243653	0.610516	ENSG00000054611.14	TBC1D22A
941.993	-0.573501	0.103588	-5.53634	3.08851e-08	1.22425e-06	ENSG00000054654.16	SYNE2
69.6866	-0.0660324	0.263556	-0.250545	0.802166	0.949587	ENSG00000054690.13	PLEKHH1
116.24	-0.1437	0.204447	-0.702869	0.482138	0.818691	ENSG00000054793.13	ATP9A
911.38	-0.0692471	0.0794099	-0.872022	0.383197	0.748581	ENSG00000054965.10	FAM168A
320.175	0.591688	0.121881	4.85464	1.20604e-06	3.30441e-05	ENSG00000054967.13	RELT
130.725	-0.0980862	0.19607	-0.500262	0.616891	0.884817	ENSG00000054983.17	GALC
3982.72	0.140551	0.0488657	2.87626	0.00402416	0.0362337	ENSG00000055044.11	NOP58
3793.87	-0.0794981	0.0419076	-1.89698	0.05783	0.260878	ENSG00000055070.17	SZRD1
24.3309	-0.125965	0.458231	-0.274895	0.783397	0.942985	ENSG00000055118.14	KCNH2
3418.27	-0.128217	0.0480588	-2.66791	0.00763236	0.0593165	ENSG00000055130.16	CUL1
400.433	-0.0818236	0.121845	-0.671539	0.501877	0.830403	ENSG00000055147.19	FAM114A2
5.14355	0.277608	0.935855	0.296636	0.766745	NA	ENSG00000055163.20	CYFIP2
1089.78	-0.169651	0.0691248	-2.45428	0.0141168	0.0949007	ENSG00000055208.19	TAB2
838.887	0.0313994	0.0804942	0.390082	0.696476	0.912442	ENSG00000055211.14	GINM1
2585.66	-0.306337	0.0548273	-5.5873	2.30622e-08	9.30685e-07	ENSG00000055332.18	EIF2AK2
787.098	0.133365	0.0892329	1.49457	0.135027	0.442536	ENSG00000055483.19	USP36
886.792	-0.495894	0.112198	-4.4198	9.87904e-06	0.000214654	ENSG00000055609.18	KMT2C
17.8194	0.300612	0.518645	0.57961	0.562177	0.861575	ENSG00000055732.13	MCOLN3
0.498942	-0.803253	3.31657	-0.242194	0.80863	NA	ENSG00000055813.6	CCDC85A
2115.59	-0.303507	0.0534497	-5.67838	1.35979e-08	5.69518e-07	ENSG00000055917.15	PUM2
564.09	0.0262603	0.0925515	0.283737	0.776612	0.940851	ENSG00000055950.16	MRPL43
5.50131	0.110514	0.942552	0.117249	0.906663	NA	ENSG00000055955.16	ITIH4
331.952	0.138567	0.120897	1.14615	0.251732	0.620895	ENSG00000056050.7	HPF1
4020.65	-0.167005	0.049024	-3.40659	0.000657792	0.00795406	ENSG00000056097.16	ZFR
332.775	0.187717	0.121525	1.54468	0.122423	0.41899	ENSG00000056277.16	ZNF280C
12.6786	-0.675736	0.609992	-1.10778	0.267957	0.640689	ENSG00000056487.16	PHF21B
54.0017	-0.0389125	0.294567	-0.1321	0.894905	0.976141	ENSG00000056558.11	TRAF1
1655.79	-0.0812158	0.0590805	-1.37466	0.169236	0.501647	ENSG00000056586.16	RC3H2
242.914	0.0988118	0.143193	0.690062	0.490155	0.822842	ENSG00000056736.10	IL17RB
79.002	-0.347441	0.244337	-1.42198	0.155033	0.476845	ENSG00000056972.19	TRAF3IP2
824.441	-0.0599258	0.0777171	-0.771076	0.440662	0.790195	ENSG00000057019.16	DCBLD2
2559.51	-0.0852724	0.049917	-1.70828	0.0875838	0.341747	ENSG00000057252.13	SOAT1
135.593	-0.0110797	0.187528	-0.0590829	0.952886	0.98607	ENSG00000057294.14	PKP2
3.17706	4.17261	1.61591	2.58221	0.00981693	NA	ENSG00000057468.7	MSH4
7594.46	0.0137305	0.0496038	0.276804	0.781931	0.942985	ENSG00000057608.17	GDI2
1.89256	-2.20446	1.77624	-1.24108	0.214577	NA	ENSG00000057657.17	PRDM1
907.94	0.0941883	0.079436	1.18571	0.235735	0.600316	ENSG00000057663.16	ATG5
2.20954	0.834677	1.47544	0.565714	0.571588	NA	ENSG00000057704.13	TMCC3
617.002	0.364164	0.0884795	4.1158	3.85841e-05	0.000715351	ENSG00000057757.10	PITHD1
640.46	-0.0706183	0.0907346	-0.778295	0.436395	0.787849	ENSG00000057935.13	MTA3
1315.18	-0.269442	0.0676812	-3.98105	6.86128e-05	0.0011803	ENSG00000058056.9	USP13
1806.69	-0.210479	0.0622235	-3.38264	0.000717937	0.00854883	ENSG00000058063.16	ATP11B
6778.97	0.0577407	0.0374762	1.54073	0.123382	0.420202	ENSG00000058262.10	SEC61A1
1003.9	-0.173856	0.0739331	-2.35154	0.018696	0.116724	ENSG00000058272.19	PPP1R12A
0.492949	-0.698696	3.33177	-0.209707	0.833896	NA	ENSG00000058335.15	RASGRF1
75.9049	0.206504	0.254857	0.810276	0.417782	0.77302	ENSG00000058404.20	CAMK2B
160.328	-0.11993	0.188333	-0.6368	0.524255	0.841843	ENSG00000058453.17	CROCC
267.106	0.144618	0.131524	1.09955	0.271528	0.644908	ENSG00000058600.16	POLR3E
2347.89	-0.307521	0.0517552	-5.94184	2.81842e-09	1.32962e-07	ENSG00000058668.14	ATP2B4
3138.48	-0.13146	0.0461819	-2.84656	0.00441937	0.0392124	ENSG00000058673.16	ZC3H11A
1033.35	0.238939	0.0792872	3.01359	0.00258179	0.0251752	ENSG00000058729.11	RIOK2
381.29	0.140297	0.114659	1.2236	0.221104	0.580512	ENSG00000058799.15	YIPF1
2910.86	-0.185519	0.0524606	-3.53635	0.00040569	0.00532886	ENSG00000058804.12	NDC1
0.315143	-1.68836	3.90801	-0.432025	0.665723	NA	ENSG00000058866.15	DGKG
245.943	0.0719846	0.146714	0.490646	0.623677	0.886863	ENSG00000059122.16	FLYWCH1
99.5634	0.403855	0.237748	1.69867	0.0893819	0.345705	ENSG00000059145.18	UNKL
109.84	0.0738595	0.211063	0.349941	0.726383	0.924951	ENSG00000059378.12	PARP12
1820.67	0.0331528	0.0574106	0.577468	0.563623	0.861864	ENSG00000059573.9	ALDH18A1
932.455	-0.210734	0.0794584	-2.65213	0.00799847	0.0617261	ENSG00000059588.10	TARBP1
306.504	0.1047	0.130138	0.804526	0.421093	0.776565	ENSG00000059691.12	GATB
401.509	1.86914	0.115768	16.1456	1.22022e-58	7.43114e-56	ENSG00000059728.11	MXD1
307.048	-0.259893	0.126309	-2.05759	0.0396294	0.201654	ENSG00000059758.8	CDK17
208.063	0.487798	0.151426	3.22137	0.00127579	0.0139194	ENSG00000059769.20	DNAJC25
1609.75	0.393387	0.0622422	6.32026	2.61125e-10	1.46383e-08	ENSG00000059804.16	SLC2A3
4.61819	0.0113648	1.01193	0.0112308	0.991039	NA	ENSG00000059915.17	PSD
361.559	-0.194584	0.116402	-1.67166	0.0945913	0.358906	ENSG00000060069.16	CTDP1
3298.18	0.230347	0.0483361	4.76553	1.88358e-06	4.91933e-05	ENSG00000060138.13	YBX3
3381.4	-0.201789	0.056783	-3.55368	0.00037988	0.00505928	ENSG00000060237.17	WNK1
0.61699	-1.26584	2.82858	-0.447518	0.654501	NA	ENSG00000060303.5	RPS17P5
2688.66	-0.148015	0.052314	-2.82936	0.00466412	0.0407243	ENSG00000060339.14	CCAR1
452.857	-0.161678	0.109406	-1.47778	0.139466	0.449608	ENSG00000060491.16	OGFR
0.330788	0.18064	3.87635	0.0466005	0.962832	NA	ENSG00000060558.3	GNA15
0.668413	0.127414	2.60922	0.0488323	0.961053	NA	ENSG00000060566.14	CREB3L3
166.148	-0.119008	0.169379	-0.702616	0.482295	0.818691	ENSG00000060642.10	PIGV
41.7301	-0.217092	0.334713	-0.64859	0.516603	0.836585	ENSG00000060656.20	PTPRU
1440.09	0.0755327	0.0614571	1.22903	0.21906	0.577548	ENSG00000060688.13	SNRNP40
0.309337	0.180639	3.97689	0.0454221	0.963771	NA	ENSG00000060709.15	RIMBP2
4.71282	-0.332007	1.00126	-0.331588	0.740201	NA	ENSG00000060718.22	COL11A1
1753.9	-0.270093	0.06868	-3.93262	8.40233e-05	0.00140192	ENSG00000060749.15	QSER1
207.702	0.12148	0.161297	0.753145	0.451363	0.796649	ENSG00000060762.19	MPC1
301.389	0.0713505	0.124558	0.572828	0.566761	0.8626	ENSG00000060971.18	ACAA1
47.5581	-0.333545	0.317379	-1.05093	0.293289	0.667259	ENSG00000060982.15	BCAT1
154.59	-0.243343	0.179125	-1.35851	0.174303	0.511344	ENSG00000061273.18	HDAC7
63.9753	0.044127	0.267632	0.16488	0.869039	0.969912	ENSG00000061337.15	LZTS1
1.82499	0.0033331	1.74837	0.00190641	0.998479	NA	ENSG00000061455.11	PRDM6
18.8028	0.396682	0.49581	0.800069	0.423671	0.778221	ENSG00000061656.9	SPAG4
4371.82	-0.140611	0.0480635	-2.92553	0.00343871	0.0319721	ENSG00000061676.15	NCKAP1
2564.36	0.0155009	0.056488	0.27441	0.783769	0.942985	ENSG00000061794.13	MRPS35
532.551	-0.189406	0.0979619	-1.93347	0.0531784	0.246449	ENSG00000061936.9	SFSWAP
253.953	0.0618712	0.138601	0.4464	0.655309	0.897693	ENSG00000061938.18	TNK2
578.986	-0.230052	0.0974688	-2.36027	0.0182619	0.11487	ENSG00000061987.16	MON2
2.03127	0.669433	1.45637	0.459657	0.645762	NA	ENSG00000062038.14	CDH3
1854.22	-0.128308	0.0627341	-2.04526	0.0408288	0.205958	ENSG00000062194.16	GPBP1
246.635	0.0887413	0.140219	0.632877	0.526814	0.842978	ENSG00000062282.15	DGAT2
74.5215	-0.581853	0.25969	-2.24056	0.0250543	0.145504	ENSG00000062370.16	ZNF112
1976.55	0.0278076	0.053545	0.519332	0.603529	0.880262	ENSG00000062485.19	CS
0.86102	2.08708	2.53069	0.824706	0.409538	NA	ENSG00000062524.16	LTK
1147.68	0.106406	0.0715651	1.48684	0.137056	0.445469	ENSG00000062582.14	MRPS24
314.664	0.0624421	0.124356	0.502125	0.61558	0.884644	ENSG00000062598.18	ELMO2
2287.76	-0.283586	0.050646	-5.59938	2.1512e-08	8.73389e-07	ENSG00000062650.19	WAPL
3513	-0.0892469	0.0474452	-1.88105	0.0599649	0.267013	ENSG00000062716.13	VMP1
820.798	-0.00784383	0.0878466	-0.08929	0.928851	0.98238	ENSG00000062725.10	APPBP2
548.242	-0.0388373	0.0947581	-0.409857	0.681911	0.908187	ENSG00000062822.13	POLD1
2.65573	2.22978	1.50031	1.48622	0.137221	NA	ENSG00000063015.19	SEZ6
5395.54	-0.047184	0.0383846	-1.22924	0.21898	0.577548	ENSG00000063046.17	EIF4B
14.4936	-0.0319387	0.573661	-0.0556752	0.955601	0.986433	ENSG00000063127.15	SLC6A16
21.1254	-0.54696	0.484678	-1.1285	0.259108	0.629927	ENSG00000063169.10	BICRA
100.151	0.0419944	0.238394	0.176155	0.860172	0.968377	ENSG00000063176.15	SPHK2
9751.16	0.200486	0.0388392	5.16196	2.44375e-07	7.75863e-06	ENSG00000063177.13	RPL18
154.535	0.0226676	0.182494	0.12421	0.901149	0.977249	ENSG00000063180.9	CA11
663.801	0.0408696	0.0853521	0.478835	0.632056	0.890341	ENSG00000063241.8	ISOC2
3369.12	0.0113985	0.0447017	0.25499	0.798731	0.948831	ENSG00000063244.12	U2AF2
643.949	-0.115196	0.091353	-1.261	0.207308	0.563046	ENSG00000063245.14	EPN1
754.802	0.124505	0.0819887	1.51856	0.128872	0.430046	ENSG00000063322.14	MED29
1.43333	-0.238362	2.05916	-0.115757	0.907845	NA	ENSG00000063438.17	AHRR
268.418	0.0101163	0.132809	0.0761722	0.939282	0.983671	ENSG00000063587.14	ZNF275
646.684	-0.14485	0.0872113	-1.66091	0.0967313	0.364547	ENSG00000063601.17	MTMR1
283.761	0.132642	0.127989	1.03636	0.300034	0.675606	ENSG00000063660.9	GPC1
78.086	-0.0867802	0.256485	-0.338344	0.735104	0.928219	ENSG00000063761.16	ADCK1
337.569	0.0766498	0.120613	0.635503	0.525101	0.842147	ENSG00000063854.13	HAGH
1267.97	0.0452393	0.0694847	0.651069	0.515002	0.836464	ENSG00000063978.16	RNF4
1877.23	0.0171261	0.0583883	0.293315	0.769282	0.937659	ENSG00000064012.21	CASP8
3.22813	0.0116006	1.27231	0.00911774	0.992725	NA	ENSG00000064042.18	LIMCH1
2727.86	0.0431576	0.0524729	0.822475	0.410807	0.767574	ENSG00000064102.15	INTS13
1262.17	-0.0898508	0.0684147	-1.31333	0.189073	0.535448	ENSG00000064115.11	TM7SF3
360.57	0.0270176	0.116853	0.23121	0.817152	0.954258	ENSG00000064199.6	SPA17
2.21657	0.867621	1.40686	0.616707	0.537428	NA	ENSG00000064225.12	ST3GAL6
2.83675	0.319645	1.35538	0.235834	0.813561	NA	ENSG00000064270.12	ATP2C2
11.8091	1.03908	0.713288	1.45674	0.145187	0.459103	ENSG00000064300.9	NGFR
41.2547	0.0778134	0.341631	0.22777	0.819825	0.954721	ENSG00000064309.14	CDON
1225.82	-0.183715	0.0688406	-2.66869	0.00761469	0.059246	ENSG00000064313.12	TAF2
76.1019	-0.327006	0.255146	-1.28164	0.199968	0.551157	ENSG00000064393.16	HIPK2
3127.28	-0.0503009	0.0446623	-1.12625	0.260059	0.630347	ENSG00000064419.13	TNPO3
56.0126	0.11345	0.308867	0.367311	0.713387	0.919599	ENSG00000064489.22	BORCS8-MEF2B
441.907	0.105885	0.108024	0.980202	0.326986	0.701627	ENSG00000064490.14	RFXANK
256.109	0.151973	0.137763	1.10314	0.269965	0.642964	ENSG00000064545.14	TMEM161A
25.9315	0.549872	0.426323	1.2898	0.197119	0.547357	ENSG00000064547.14	LPAR2
1027.29	0.104029	0.0719186	1.44648	0.148042	0.464402	ENSG00000064601.18	CTSA
2055.71	-0.0799855	0.056558	-1.41422	0.157297	0.481047	ENSG00000064607.17	SUGP2
701.006	-0.0781028	0.0900221	-0.867596	0.385615	0.750614	ENSG00000064651.14	SLC12A2
269.918	0.160584	0.139681	1.14965	0.250288	0.618806	ENSG00000064652.11	SNX24
2.28195	1.35551	1.51379	0.895437	0.370554	NA	ENSG00000064655.19	EYA2
1790.92	-0.0816201	0.0563014	-1.4497	0.147142	0.462989	ENSG00000064666.15	CNN2
85.1695	0.218616	0.233388	0.936708	0.348909	0.721789	ENSG00000064687.12	ABCA7
741.305	0.000424726	0.0852202	0.00498386	0.996023	0.999081	ENSG00000064703.12	DDX20
1640.18	-0.0824343	0.0616357	-1.33744	0.181078	0.523444	ENSG00000064726.9	BTBD1
36.1389	-0.220991	0.385367	-0.573455	0.566336	0.862247	ENSG00000064763.11	FAR2
22.8802	-0.286706	0.460197	-0.623008	0.53328	0.846048	ENSG00000064787.13	BCAS1
14.7026	0.705504	0.55861	1.26296	0.206602	0.561928	ENSG00000064886.14	CHI3L2
380.609	-0.00914466	0.118611	-0.0770981	0.938545	0.983671	ENSG00000064932.16	SBNO2
471.165	0.0553951	0.107969	0.513063	0.607907	0.882412	ENSG00000064933.17	PMS1
1046.12	0.0718141	0.0728032	0.986415	0.32393	0.698874	ENSG00000064961.19	HMG20B
599.626	0.0751227	0.090531	0.8298	0.406652	0.765211	ENSG00000064995.17	TAF11
238.186	-0.0322692	0.141791	-0.227582	0.819971	0.954721	ENSG00000064999.15	ANKS1A
2034.17	-0.176809	0.0561425	-3.14928	0.00163672	0.0172396	ENSG00000065000.17	AP3D1
210.739	0.0928222	0.152301	0.609465	0.542216	0.851762	ENSG00000065029.15	ZNF76
155.975	-0.120254	0.17109	-0.702872	0.482135	0.818691	ENSG00000065054.14	SLC9A3R2
177.615	-0.0142998	0.167118	-0.0855673	0.93181	0.982536	ENSG00000065057.8	NTHL1
841.71	-0.319957	0.0851105	-3.75931	0.000170379	0.00258229	ENSG00000065060.17	UHRF1BP1
3946.83	0.0394978	0.0430986	0.916451	0.35943	0.730278	ENSG00000065135.11	GNAI3
4969.42	-0.124273	0.0411302	-3.02145	0.00251569	0.0246503	ENSG00000065150.19	IPO5
4279.22	0.177807	0.049936	3.56069	0.000369877	0.00495561	ENSG00000065154.11	OAT
2165.91	-0.0461856	0.0557405	-0.828583	0.40734	0.765942	ENSG00000065183.16	WDR3
2148.26	-0.165004	0.0575419	-2.86754	0.00413679	0.0370734	ENSG00000065243.20	PKN2
592.381	0.124091	0.0906044	1.36959	0.170814	0.504533	ENSG00000065268.10	WDR18
783.589	-0.169195	0.0933306	-1.81286	0.0698539	0.296172	ENSG00000065308.5	TRAM2
142.767	0.0338845	0.198715	0.170518	0.864603	0.9688	ENSG00000065320.9	NTN1
1030.21	-0.0657021	0.0714704	-0.91929	0.357944	0.728502	ENSG00000065328.16	MCM10
25.0218	0.095098	0.429617	0.221355	0.824816	0.956595	ENSG00000065357.20	DGKA
34.979	0.403949	0.385601	1.04758	0.294831	0.669309	ENSG00000065361.15	ERBB3
153.713	-0.309379	0.180739	-1.71174	0.0869445	0.340256	ENSG00000065413.20	ANKRD44
6578.9	0.0737194	0.0426113	1.73004	0.0836224	0.331864	ENSG00000065427.14	KARS
644.59	-0.243791	0.0874175	-2.78881	0.00529017	0.0452078	ENSG00000065457.10	ADAT1
445.537	0.120877	0.104745	1.15401	0.248494	0.615866	ENSG00000065485.20	PDIA5
193.763	-0.0974066	0.157911	-0.616847	0.537336	0.849622	ENSG00000065491.8	TBC1D22B
1497.34	0.146182	0.0651155	2.24497	0.02477	0.144479	ENSG00000065518.8	NDUFB4
499.152	-0.281617	0.116024	-2.42724	0.0152143	0.100712	ENSG00000065526.11	SPEN
15.8179	-0.46497	0.562946	-0.825959	0.408827	0.767333	ENSG00000065534.18	MYLK
3023.11	0.093439	0.0551697	1.69367	0.0903288	0.347866	ENSG00000065548.18	ZC3H15
899.342	-0.0452073	0.0756661	-0.597458	0.550202	0.855969	ENSG00000065559.15	MAP2K4
209.005	0.447594	0.149932	2.98531	0.0028329	0.0271885	ENSG00000065600.12	TMEM206
5125.67	-0.403178	0.0472458	-8.53362	1.41833e-17	1.6104e-15	ENSG00000065613.14	SLK
465.996	0.0152998	0.112521	0.135973	0.891843	0.975964	ENSG00000065615.14	CYB5R4
853.077	-0.0579632	0.0790262	-0.733468	0.463273	0.805636	ENSG00000065618.20	COL17A1
14.4917	0.868393	0.570614	1.52186	0.128045	0.428565	ENSG00000065621.15	GSTO2
126.673	0.154578	0.20055	0.770774	0.440841	0.790258	ENSG00000065665.21	SEC61A2
0.514587	1.05239	3.04997	0.34505	0.730057	NA	ENSG00000065675.14	PRKCQ
90.5737	0.12672	0.227101	0.557992	0.57685	0.867314	ENSG00000065717.15	TLE2
247.996	-0.279183	0.140588	-1.98582	0.0470532	0.227018	ENSG00000065802.12	ASB1
620.05	0.030144	0.0886052	0.340206	0.733702	0.927712	ENSG00000065809.13	FAM107B
346.892	-0.103078	0.117526	-0.877064	0.380452	0.746814	ENSG00000065833.9	ME1
361.229	-0.0516402	0.115201	-0.448263	0.653964	0.897082	ENSG00000065882.16	TBC1D1
781.851	-0.136474	0.0827217	-1.64979	0.0989856	0.369951	ENSG00000065883.16	CDK13
4443.85	0.242588	0.0439885	5.5148	3.49169e-08	1.3443e-06	ENSG00000065911.12	MTHFD2
644.951	-0.289807	0.102641	-2.8235	0.00475026	0.0412785	ENSG00000065923.10	SLC9A7
266.517	-0.0661819	0.133359	-0.496267	0.619706	0.885068	ENSG00000065970.9	FOXJ2
18599.4	0.115699	0.0329367	3.51276	0.000443474	0.00576301	ENSG00000065978.19	YBX1
4.93051	-0.186811	0.954254	-0.195766	0.844793	NA	ENSG00000065989.16	PDE4A
982.931	-0.0518869	0.0754434	-0.687759	0.491605	0.823846	ENSG00000066027.12	PPP2R5A
1869.82	-0.0806763	0.0558988	-1.44325	0.148949	0.466047	ENSG00000066044.15	ELAVL1
0.493136	0.978396	3.33221	0.293618	0.76905	NA	ENSG00000066056.14	TIE1
568.262	-0.390833	0.0939848	-4.15846	3.20395e-05	0.000602901	ENSG00000066084.13	DIP2B
1027.24	-0.093457	0.0743979	-1.25618	0.209051	0.565108	ENSG00000066117.14	SMARCD1
589.292	0.0111437	0.0908444	0.122668	0.90237	0.977914	ENSG00000066135.13	KDM4A
479.135	0.0748239	0.105598	0.708572	0.47859	0.816595	ENSG00000066136.20	NFYC
16.5661	0.0272009	0.531102	0.0512161	0.959153	0.98734	ENSG00000066185.13	ZMYND12
80.6577	-0.163677	0.276097	-0.592823	0.5533	0.85792	ENSG00000066230.11	SLC9A3
286.962	0.0425013	0.126472	0.336054	0.73683	0.928292	ENSG00000066248.15	NGEF
5258.73	-0.463905	0.0469381	-9.88332	4.91761e-23	7.48707e-21	ENSG00000066279.18	ASPM
1332.76	0.116505	0.0637371	1.8279	0.0675641	0.290013	ENSG00000066322.15	ELOVL1
1.01503	0.151185	2.08438	0.0725324	0.942178	NA	ENSG00000066336.11	SPI1
255.417	-0.0263443	0.135516	-0.1944	0.845863	0.962585	ENSG00000066379.15	ZNRD1
896.322	0.209717	0.0780687	2.68631	0.00722456	0.0572072	ENSG00000066422.4	ZBTB11
252.512	0.0460178	0.134389	0.342423	0.732033	0.927273	ENSG00000066427.22	ATXN3
648.496	-0.0842298	0.0884198	-0.952613	0.340786	0.713506	ENSG00000066455.13	GOLGA5
18.0015	-0.312773	0.529944	-0.590201	0.555056	0.858812	ENSG00000066468.22	FGFR2
968.645	0.0105783	0.0775668	0.136377	0.891523	0.975964	ENSG00000066557.6	LRRC40
118.495	0.117736	0.19974	0.589449	0.55556	0.858919	ENSG00000066583.12	ISOC1
176.19	-0.167337	0.16756	-0.99867	0.317955	0.692353	ENSG00000066629.17	EML1
397.73	-0.0445717	0.117804	-0.378353	0.705168	0.915643	ENSG00000066651.20	TRMT11
938.559	-0.0972222	0.0780669	-1.24537	0.212995	0.569716	ENSG00000066654.14	THUMPD1
497.678	-0.00743205	0.0981418	-0.0757277	0.939636	0.983671	ENSG00000066697.14	MSANTD3
93.9136	-0.33683	0.233628	-1.44173	0.149377	0.467171	ENSG00000066735.14	KIF26A
498.814	-0.303605	0.105293	-2.88343	0.00393376	0.0356594	ENSG00000066739.12	ATG2B
697.586	-0.418848	0.0840446	-4.98364	6.23987e-07	1.81349e-05	ENSG00000066777.9	ARFGEF1
102.237	-0.00143705	0.216554	-0.00663598	0.994705	0.998506	ENSG00000066827.16	ZFAT
906.73	-0.0588464	0.0794492	-0.74068	0.458887	0.802529	ENSG00000066855.16	MTFR1
33.9655	-0.197611	0.405396	-0.487451	0.625939	0.88759	ENSG00000066923.17	STAG3
756.059	-0.056289	0.0831544	-0.676922	0.498456	0.828061	ENSG00000066926.11	FECH
621.179	-0.431087	0.0917623	-4.69787	2.62888e-06	6.67079e-05	ENSG00000066933.16	MYO9A
1554.56	0.0378225	0.065088	0.581099	0.561174	0.861181	ENSG00000067057.17	PFKP
1330.03	0.715424	0.0801527	8.92576	4.42654e-19	5.54269e-17	ENSG00000067064.11	IDI1
533.329	-0.0821437	0.0973329	-0.843946	0.3987	0.759423	ENSG00000067066.17	SP100
2689.33	0.378023	0.0482665	7.83199	4.80225e-15	4.43728e-13	ENSG00000067082.15	KLF6
793.23	-0.000494557	0.0836987	-0.00590878	0.995286	0.998939	ENSG00000067113.17	PLPP1
29.2004	-0.117568	0.399037	-0.294631	0.768276	0.937532	ENSG00000067141.17	NEO1
1688.21	-0.0361216	0.0657632	-0.549267	0.582822	0.870227	ENSG00000067167.8	TRAM1
385.01	-0.180641	0.11177	-1.61619	0.106053	0.385227	ENSG00000067177.15	PHKA1
1154.74	-0.2536	0.0663367	-3.82291	0.000131884	0.00206665	ENSG00000067182.7	TNFRSF1A
44.5754	0.451414	0.320142	1.41004	0.158527	0.482386	ENSG00000067191.16	CACNB1
391.895	-0.316426	0.112151	-2.82144	0.00478092	0.0414115	ENSG00000067208.14	EVI5
70.4321	-0.0337583	0.258924	-0.13038	0.896266	0.976371	ENSG00000067221.14	STOML1
22523.4	-2.85005e-05	0.0285977	-0.000996602	0.999205	0.999578	ENSG00000067225.18	PKM
1784.65	-0.0711487	0.0595874	-1.19402	0.23247	0.596097	ENSG00000067248.10	DHX29
5885.17	0.181965	0.04688	3.88151	0.00010381	0.0016737	ENSG00000067334.14	DNTTIP2
145.971	0.0884888	0.188204	0.470176	0.638229	0.891937	ENSG00000067365.14	METTL22
1152.5	-0.117562	0.0677007	-1.7365	0.0824758	0.329068	ENSG00000067369.13	TP53BP1
0.337721	0.18064	3.8455	0.0469743	0.962534	NA	ENSG00000067445.20	TRO
870.561	0.0468229	0.0789469	0.593094	0.553118	0.857916	ENSG00000067533.6	RRP15
5811.43	0.0615518	0.0420889	1.46242	0.143625	0.457693	ENSG00000067560.11	RHOA
1292.59	-0.0705551	0.0706921	-0.998062	0.318249	0.69253	ENSG00000067596.11	DHX8
56.2786	-0.242725	0.290998	-0.834112	0.404218	0.763728	ENSG00000067601.8	PMS2P4
233.237	0.0433468	0.141774	0.305746	0.759798	0.934325	ENSG00000067606.17	PRKCZ
4283.37	-0.0328514	0.0449164	-0.731391	0.46454	0.806535	ENSG00000067704.10	IARS2
1310.51	-0.152282	0.0659538	-2.30892	0.0209479	0.127482	ENSG00000067715.14	SYT1
0.339123	0.18064	3.83948	0.047048	0.962475	NA	ENSG00000067798.16	NAV3
606.292	0.00273649	0.0908407	0.030124	0.975968	0.992713	ENSG00000067829.19	IDH3G
117.045	0.035388	0.20718	0.170808	0.864375	0.9688	ENSG00000067836.12	ROGDI
167.219	-0.00734371	0.168714	-0.0435276	0.965281	0.989511	ENSG00000067840.12	PDZD4
0.809777	-0.406687	2.41151	-0.168645	0.866076	NA	ENSG00000067842.17	ATP2B3
1974.3	-0.225254	0.064752	-3.47872	0.000503809	0.00636796	ENSG00000067900.8	ROCK1
2783.64	-0.0993703	0.0553924	-1.79393	0.0728238	0.303879	ENSG00000067955.14	CBFB
309.858	-0.22532	0.123273	-1.82781	0.0675788	0.290013	ENSG00000067992.14	PDK3
483.081	-0.0117049	0.101255	-0.115598	0.907971	0.979116	ENSG00000068001.14	HYAL2
222.588	-0.237411	0.154294	-1.53869	0.123879	0.420823	ENSG00000068024.16	HDAC4
229.893	0.699901	0.141939	4.931	8.18083e-07	2.31727e-05	ENSG00000068028.17	RASSF1
197.239	0.264123	0.157479	1.6772	0.093503	0.356605	ENSG00000068078.18	FGFR3
143.787	-0.0105798	0.17903	-0.0590954	0.952876	0.98607	ENSG00000068079.7	IFI35
198.827	-0.166993	0.152593	-1.09437	0.273793	0.647558	ENSG00000068097.14	HEATR6
681.669	-0.0620594	0.0886937	-0.699704	0.484112	0.819163	ENSG00000068120.15	COASY
126.378	0.215655	0.195662	1.10218	0.270382	0.643211	ENSG00000068137.15	PLEKHH3
431.356	-0.0655764	0.106849	-0.613729	0.539395	0.850099	ENSG00000068305.17	MEF2A
1179.29	0.117716	0.0669601	1.758	0.0787479	0.318654	ENSG00000068308.13	OTUD5
857.886	-0.00562271	0.0816881	-0.0688314	0.945124	0.985019	ENSG00000068323.17	TFE3
199.224	-0.0200429	0.15356	-0.130522	0.896154	0.976371	ENSG00000068354.16	TBC1D25
923.125	-0.0160972	0.0823831	-0.195394	0.845085	0.96223	ENSG00000068366.19	ACSL4
420.577	-0.0699387	0.107505	-0.650563	0.515328	0.836464	ENSG00000068383.19	INPP5A
705.378	0.159229	0.0860352	1.85074	0.0642073	0.28012	ENSG00000068394.11	GPKOW
698.312	0.0925453	0.0830935	1.11375	0.265387	0.636714	ENSG00000068400.13	GRIPAP1
919.145	0.03678	0.0822325	0.447268	0.654682	0.897608	ENSG00000068438.15	FTSJ1
1701.48	-0.144069	0.057643	-2.49934	0.0124426	0.0857543	ENSG00000068489.12	PRR11
13.4037	-0.454332	0.582187	-0.780387	0.435163	0.787001	ENSG00000068615.18	REEP1
258.61	-0.266027	0.143136	-1.85856	0.0630896	0.276903	ENSG00000068650.18	ATP11A
1365.53	-0.166091	0.0666352	-2.49255	0.0126831	0.0868755	ENSG00000068654.16	POLR1A
2923.38	0.0841662	0.0527756	1.59479	0.110758	0.396245	ENSG00000068697.7	LAPTM4A
155.33	-0.258671	0.176397	-1.46641	0.142536	0.456029	ENSG00000068724.16	TTC7A
657.03	0.537094	0.0868709	6.18266	6.30293e-10	3.33781e-08	ENSG00000068745.15	IP6K2
573.644	-0.183689	0.0945847	-1.94206	0.0521302	0.243784	ENSG00000068784.13	SRBD1
1388.11	-0.277977	0.0630824	-4.40657	1.05019e-05	0.000226942	ENSG00000068796.16	KIF2A
7.00544	0.426908	0.80585	0.529761	0.596277	NA	ENSG00000068831.19	RASGRP2
2589.2	-0.238726	0.049581	-4.81487	1.47293e-06	3.94687e-05	ENSG00000068878.15	PSME4
588.507	-0.02855	0.0988426	-0.288843	0.772702	0.939272	ENSG00000068885.15	IFT80
620.031	0.130316	0.0893852	1.45791	0.144864	0.458768	ENSG00000068903.20	SIRT2
802.304	-0.0496475	0.0805715	-0.616192	0.537768	0.849622	ENSG00000068912.14	ERLEC1
79.2853	0.278407	0.248774	1.11912	0.26309	0.633449	ENSG00000068971.14	PPP2R5B
6.73047	2.63705	0.950952	2.77306	0.00555313	NA	ENSG00000068976.14	PYGM
350.67	-0.154946	0.120289	-1.28811	0.197707	0.547702	ENSG00000069011.16	PITX1
0.347739	2.01672	3.76106	0.536211	0.591813	NA	ENSG00000069018.18	TRPC7
18.2812	-0.861572	0.521916	-1.65079	0.0987825	0.369793	ENSG00000069020.18	MAST4
0.339123	0.18064	3.83948	0.047048	0.962475	NA	ENSG00000069188.17	SDK2
2037.7	-0.0781994	0.0535225	-1.46105	0.144	0.457944	ENSG00000069248.12	NUP133
12702.7	-0.161339	0.0370387	-4.35596	1.32483e-05	0.000279089	ENSG00000069275.13	NUCKS1
6287.43	-0.0591359	0.0435442	-1.35807	0.174443	0.511419	ENSG00000069329.17	VPS35
3157.58	0.0817612	0.0491052	1.66502	0.0959085	0.362477	ENSG00000069345.12	DNAJA2
29.4019	-0.0521679	0.391554	-0.133233	0.894009	0.975964	ENSG00000069399.15	BCL3
155.955	-0.115833	0.177673	-0.651945	0.514437	0.836464	ENSG00000069424.14	KCNAB2
669.136	0.328075	0.0925286	3.54566	0.000391636	0.00519519	ENSG00000069482.7	GAL
14.4359	0.594372	0.597037	0.995536	0.319476	0.693958	ENSG00000069493.15	CLEC2D
10.1528	-0.239338	0.675179	-0.354481	0.722978	NA	ENSG00000069667.16	RORA
3.92531	1.1243	1.10782	1.01488	0.310165	NA	ENSG00000069696.6	DRD4
392.909	0.0191361	0.118013	0.162152	0.871186	0.970227	ENSG00000069702.11	TGFBR3
0.865226	2.09388	2.52717	0.828548	0.40736	NA	ENSG00000069764.9	PLA2G10
32.4059	0.769626	0.385507	1.9964	0.0458903	0.22374	ENSG00000069812.11	HES2
3768.4	0.153854	0.0439372	3.50167	0.000462348	0.00595629	ENSG00000069849.11	ATP1B3
988.598	-0.132965	0.0748025	-1.77755	0.0754785	0.310191	ENSG00000069869.16	NEDD4
198.121	0.0080941	0.154185	0.052496	0.958134	0.98734	ENSG00000069943.10	PIGB
1611.84	0.097914	0.0577116	1.69661	0.0897705	0.346313	ENSG00000069956.12	MAPK6
196.916	0.122776	0.153933	0.797594	0.425106	0.779788	ENSG00000069966.18	GNB5
209.563	0.0149861	0.160104	0.093602	0.925425	0.981804	ENSG00000069974.16	RAB27A
619.811	0.0664941	0.0918155	0.724214	0.468934	0.80995	ENSG00000069998.12	HDHD5
1501.13	0.146319	0.0601364	2.43311	0.0149697	0.0995846	ENSG00000070010.19	UFD1
910.103	-0.426988	0.0896122	-4.76484	1.89002e-06	4.92655e-05	ENSG00000070018.9	LRP6
16.4348	-0.88566	0.543442	-1.62972	0.10316	0.379597	ENSG00000070019.5	GUCY2C
0.490325	-2.31942	3.27135	-0.709009	0.478319	NA	ENSG00000070031.4	SCT
390.374	-0.364088	0.115715	-3.14643	0.00165278	0.0173678	ENSG00000070047.12	PHRF1
1434.28	-0.0210861	0.0619619	-0.340307	0.733625	0.927712	ENSG00000070061.15	ELP1
3832.86	0.0383468	0.0518327	0.73982	0.459409	0.802918	ENSG00000070081.16	NUCB2
2957.49	-0.0116159	0.0464348	-0.250156	0.802467	0.949607	ENSG00000070087.14	PFN2
1592.91	-0.215718	0.0601775	-3.58469	0.000337473	0.00456983	ENSG00000070159.14	PTPN3
1.09232	-3.48368	2.41998	-1.43955	0.149995	NA	ENSG00000070182.20	SPTB
306.291	-0.0928	0.122576	-0.757082	0.449	0.794623	ENSG00000070214.16	SLC44A1
183.443	-0.0997052	0.164516	-0.606052	0.54448	0.853609	ENSG00000070269.14	TMEM260
432.15	-0.178739	0.108228	-1.65151	0.0986349	0.36955	ENSG00000070366.14	SMG6
1434.71	-0.195903	0.0673211	-2.90998	0.00361446	0.0332829	ENSG00000070367.16	EXOC5
158.692	-0.0794616	0.170793	-0.465251	0.641752	0.892947	ENSG00000070371.16	CLTCL1
2.40312	-0.430451	1.41534	-0.304133	0.761027	NA	ENSG00000070388.11	FGF22
63.4324	0.607652	0.274219	2.21594	0.0266957	0.151876	ENSG00000070404.10	FSTL3
656.704	-0.0486868	0.103745	-0.469293	0.63886	0.892229	ENSG00000070413.20	DGCR2
505.825	-0.0638965	0.0988158	-0.646622	0.517877	0.837277	ENSG00000070423.18	RNF126
178.273	0.0352104	0.181577	0.193915	0.846243	0.962802	ENSG00000070444.15	MNT
212.002	-0.0319085	0.159192	-0.200441	0.841136	0.96126	ENSG00000070476.15	ZXDC
703.853	0.46272	0.0852573	5.42734	5.72004e-08	2.12113e-06	ENSG00000070495.14	JMJD6
347.178	0.264193	0.126399	2.09015	0.0366048	0.190903	ENSG00000070501.12	POLB
159.83	-0.075724	0.169458	-0.44686	0.654976	0.897693	ENSG00000070540.13	WIPI1
0.80116	-1.69928	2.42317	-0.701264	0.483138	NA	ENSG00000070601.10	FRMPD1
296.861	-0.0570031	0.13461	-0.423469	0.671953	0.904796	ENSG00000070610.14	GBA2
1074.4	-0.283704	0.0721916	-3.92987	8.49925e-05	0.00141633	ENSG00000070614.15	NDST1
847.226	0.290565	0.0800829	3.6283	0.000285289	0.00401502	ENSG00000070669.17	ASNS
477.319	0.230128	0.10598	2.17143	0.0298988	0.164444	ENSG00000070718.12	AP3M2
19.6649	-0.356418	0.483292	-0.737479	0.460831	0.804003	ENSG00000070731.10	ST6GALNAC2
13046.4	0.00132297	0.0306599	0.0431498	0.965582	0.989511	ENSG00000070756.16	PABPC1
9.53059	0.0560953	0.711741	0.0788142	0.93718	NA	ENSG00000070759.17	TESK2
953.057	0.431268	0.0740347	5.82521	5.70397e-09	2.52217e-07	ENSG00000070761.8	CFAP20
1907.97	-0.115344	0.0572665	-2.01417	0.0439916	0.216993	ENSG00000070770.9	CSNK2A2
47.7189	-0.491047	0.322661	-1.52187	0.128042	0.428565	ENSG00000070778.13	PTPN21
1044.11	0.132125	0.0717043	1.84264	0.0653813	0.28404	ENSG00000070785.16	EIF2B3
0.653991	0.172468	2.79458	0.061715	0.95079	NA	ENSG00000070808.15	CAMK2A
1606.64	-0.126506	0.0695125	-1.8199	0.0687741	0.292891	ENSG00000070814.19	TCOF1
5362.73	0.0649739	0.0463688	1.40124	0.161141	0.487023	ENSG00000070831.16	CDC42
1462.26	-0.179729	0.0612145	-2.93605	0.00332421	0.0310151	ENSG00000070882.13	OSBPL3
9.32225	-0.0235874	0.696599	-0.0338608	0.972988	NA	ENSG00000070886.12	EPHA8
714.292	-0.104531	0.0885171	-1.18091	0.237638	0.602321	ENSG00000070950.10	RAD18
99.7304	-0.188329	0.218746	-0.860948	0.389266	0.752831	ENSG00000070961.15	ATP2B1
0.471781	0.97761	3.38585	0.288733	0.772785	NA	ENSG00000070985.13	TRPM5
168.428	0.00866588	0.167844	0.0516305	0.958823	0.98734	ENSG00000071051.14	NCK2
1904.74	-0.134921	0.055894	-2.41386	0.0157844	0.103753	ENSG00000071054.16	MAP4K4
22.9803	-0.107733	0.465496	-0.231438	0.816974	0.954217	ENSG00000071073.13	MGAT4A
9598.34	0.17053	0.0400694	4.25586	2.08246e-05	0.000418303	ENSG00000071082.11	RPL31
4015.08	-0.0218026	0.040921	-0.532797	0.594174	0.876708	ENSG00000071127.17	WDR1
1347.05	-0.205144	0.0703463	-2.91621	0.00354314	0.0327612	ENSG00000071189.21	SNX13
157.515	-0.116291	0.172701	-0.673365	0.500715	0.829982	ENSG00000071205.11	ARHGAP10
3.47303	-0.232807	1.17727	-0.197751	0.84324	NA	ENSG00000071242.12	RPS6KA2
310.879	0.158709	0.126256	1.25704	0.208738	0.564871	ENSG00000071243.16	ING3
69.4536	0.374205	0.262375	1.42622	0.153804	0.475247	ENSG00000071246.11	VASH1
11.5537	-0.134707	0.628126	-0.214458	0.83019	0.957714	ENSG00000071282.12	LMCD1
1978.84	0.15386	0.054485	2.82389	0.00474448	0.0412785	ENSG00000071462.11	BUD23
641.518	-0.187171	0.0894905	-2.09152	0.0364815	0.190557	ENSG00000071537.14	SEL1L
2042.79	0.031939	0.053018	0.602418	0.546896	0.854722	ENSG00000071539.14	TRIP13
786.644	0.0250206	0.0828176	0.302117	0.762563	0.935156	ENSG00000071553.17	ATP6AP1
1395.3	0.00732339	0.0634349	0.115447	0.90809	0.979116	ENSG00000071564.15	TCF3
1025.31	-0.462913	0.0744381	-6.21876	5.01083e-10	2.71802e-08	ENSG00000071575.11	TRIB2
2077.31	-0.0157954	0.0532913	-0.296397	0.766927	0.936927	ENSG00000071626.16	DAZAP1
1431.46	-0.0585207	0.0626346	-0.934319	0.35014	0.72283	ENSG00000071655.18	MBD3
3159.93	-0.265932	0.0495451	-5.36746	7.98529e-08	2.88375e-06	ENSG00000071794.16	HLTF
1050.47	0.124497	0.0696049	1.78863	0.0736748	0.306025	ENSG00000071859.15	FAM50A
319.597	0.080928	0.123369	0.655985	0.511834	0.836464	ENSG00000071889.16	FAM3A
875.754	-0.0131116	0.0755516	-0.173545	0.862223	0.968377	ENSG00000071894.17	CPSF1
1987.85	-0.0106221	0.0600175	-0.176983	0.859522	0.968271	ENSG00000071967.12	CYBRD1
0.322076	-1.71577	3.87497	-0.442784	0.657922	NA	ENSG00000071991.8	CDH19
1568.94	0.0297361	0.0591033	0.503121	0.614879	0.88456	ENSG00000071994.10	PDCD2
1352.15	0.146299	0.0654599	2.23494	0.0254212	0.146934	ENSG00000072042.13	RDH11
831.916	-0.0715785	0.0791087	-0.904812	0.365565	0.735632	ENSG00000072062.13	PRKACA
528.951	-0.0628687	0.107335	-0.585725	0.55806	0.859697	ENSG00000072071.16	ADGRL1
0.322076	-1.71577	3.87497	-0.442784	0.657922	NA	ENSG00000072080.11	SPP2
2076.93	-0.127021	0.0535088	-2.37384	0.0176041	0.111888	ENSG00000072110.13	ACTN1
242.11	-0.262906	0.145804	-1.80314	0.0713665	0.299952	ENSG00000072121.16	ZFYVE26
396.428	0.00107931	0.115163	0.00937209	0.992522	0.99781	ENSG00000072134.15	EPN2
331.415	0.0203374	0.122915	0.165459	0.868583	0.969792	ENSG00000072135.13	PTPN18
34.2702	0.039887	0.389249	0.102472	0.918382	0.980307	ENSG00000072163.19	LIMS2
1.80702	-0.0851976	1.64278	-0.0518618	0.958639	NA	ENSG00000072182.12	ASIC4
11.1489	-0.122406	0.636222	-0.192396	0.847432	NA	ENSG00000072195.15	SPEG
8.08993	-0.797549	0.762553	-1.04589	0.29561	NA	ENSG00000072201.13	LNX1
1454.52	-0.0727576	0.0611115	-1.19057	0.233822	0.597461	ENSG00000072210.18	ALDH3A2
19232.3	0.0602076	0.0285037	2.11227	0.0346632	0.183782	ENSG00000072274.13	TFRC
661.841	0.136265	0.0881828	1.54526	0.122283	0.41899	ENSG00000072310.16	SREBF1
2803.96	-0.263244	0.0533984	-4.92982	8.23062e-07	2.32645e-05	ENSG00000072364.13	AFF4
372.531	0.397609	0.116141	3.4235	0.000618211	0.00755729	ENSG00000072401.15	UBE2D1
624.107	-0.0517019	0.0998845	-0.517617	0.604725	0.880951	ENSG00000072415.8	MPP5
1830.46	-0.0777116	0.057299	-1.35625	0.175021	0.512553	ENSG00000072501.17	SMC1A
616.883	0.137424	0.0907681	1.51401	0.130024	0.431603	ENSG00000072506.12	HSD17B10
378.06	-0.16643	0.116779	-1.42516	0.15411	0.475692	ENSG00000072518.20	MARK2
5143.32	-0.108972	0.0583372	-1.86796	0.0617675	0.272224	ENSG00000072571.20	HMMR
440.652	-0.0614057	0.104521	-0.587498	0.55687	0.859159	ENSG00000072609.17	CHFR
332.059	0.181869	0.120158	1.51358	0.130132	0.431775	ENSG00000072682.18	P4HA2
1250.61	-0.105435	0.0674752	-1.56258	0.118152	0.411619	ENSG00000072736.19	NFATC3
347.032	0.136015	0.115796	1.17461	0.240152	0.60583	ENSG00000072756.17	TRNT1
2880.14	0.121773	0.0512552	2.37582	0.01751	0.111502	ENSG00000072778.20	ACADVL
261.872	-0.156396	0.136894	-1.14246	0.253264	0.623298	ENSG00000072786.13	STK10
1678	-0.174588	0.0589774	-2.96026	0.00307382	0.0289614	ENSG00000072803.17	FBXW11
11.1381	0.605338	0.651259	0.929489	0.352636	NA	ENSG00000072818.12	ACAP1
830.909	0.0574373	0.0769629	0.746299	0.455487	0.79919	ENSG00000072849.11	DERL2
984.049	-0.15171	0.0769942	-1.97041	0.0487916	0.232803	ENSG00000072864.15	NDE1
156.048	0.0758987	0.174593	0.434717	0.663768	0.901395	ENSG00000072954.7	TMEM38A
1086.96	-0.0421602	0.0761806	-0.553424	0.579973	0.868662	ENSG00000072958.8	AP1M1
777.642	0.143496	0.0801014	1.79143	0.0732244	0.304791	ENSG00000073008.15	PVR
434.846	0.0225396	0.104257	0.216193	0.828837	0.957509	ENSG00000073050.11	XRCC1
870.579	-0.0371402	0.0762279	-0.487226	0.626098	0.88759	ENSG00000073060.16	SCARB1
2.46709	0.721725	1.36066	0.530423	0.595819	NA	ENSG00000073067.14	CYP2W1
3098.76	-0.00230284	0.0460929	-0.0499608	0.960154	0.987574	ENSG00000073111.14	MCM2
128.512	0.0709546	0.198377	0.357676	0.720586	0.922631	ENSG00000073150.13	PANX2
197.485	-0.031449	0.152621	-0.20606	0.836744	0.960429	ENSG00000073169.14	SELENOO
843.471	-0.232029	0.079088	-2.93381	0.00334826	0.0311961	ENSG00000073282.13	TP63
79.0854	0.0247312	0.240404	0.102873	0.918064	0.980307	ENSG00000073331.18	ALPK1
74.0045	0.423883	0.251365	1.68633	0.0917328	0.351354	ENSG00000073350.13	LLGL2
1020.69	-0.137313	0.0715655	-1.9187	0.0550224	0.252713	ENSG00000073417.15	PDE8A
25.189	-0.782443	0.478985	-1.63354	0.102355	0.377677	ENSG00000073464.12	CLCN4
433.795	0.0384189	0.105496	0.364176	0.715727	0.920372	ENSG00000073536.18	NLE1
2017.25	0.0256327	0.0559771	0.457913	0.647015	0.894758	ENSG00000073578.17	SDHA
2199.64	-0.0266802	0.0578663	-0.461067	0.644751	0.894194	ENSG00000073584.20	SMARCE1
0.826824	0.830018	2.54345	0.326335	0.744171	NA	ENSG00000073598.6	FNDC8
55.4797	0.0787427	0.298698	0.26362	0.792073	0.946261	ENSG00000073605.18	GSDMB
2331.8	-0.207853	0.0519598	-4.00027	6.32705e-05	0.00110234	ENSG00000073614.12	KDM5A
76.8382	-0.0430835	0.245849	-0.175244	0.860888	0.968377	ENSG00000073670.14	ADAM11
125.784	-0.376991	0.193466	-1.94861	0.0513416	0.241954	ENSG00000073711.11	PPP2R3A
845.518	-0.116969	0.0779914	-1.49976	0.133676	0.439736	ENSG00000073712.15	FERMT2
0.846777	0.75955	2.25918	0.336206	0.736716	NA	ENSG00000073734.9	ABCB11
1832.11	-0.186765	0.0558127	-3.34628	0.000819036	0.00954212	ENSG00000073792.15	IGF2BP2
531.831	0.136433	0.100445	1.35828	0.174375	0.511411	ENSG00000073803.14	MAP3K13
28.0512	-0.0261577	0.404882	-0.0646057	0.948488	0.985019	ENSG00000073849.15	ST6GAL1
1.06607	3.62843	2.45043	1.48074	0.138677	NA	ENSG00000073861.3	TBX21
8.48252	-0.863458	0.749301	-1.15235	0.249177	NA	ENSG00000073905.8	VDAC1P1
2573.02	-0.0300985	0.0522685	-0.575845	0.56472	0.862053	ENSG00000073921.18	PICALM
2292.65	-0.0915993	0.0554795	-1.65105	0.0987287	0.369793	ENSG00000073969.18	NSF
5.74254	-0.417545	0.881833	-0.473497	0.635859	NA	ENSG00000074047.21	GLI2
1059.09	-0.289873	0.0745429	-3.88868	0.000100793	0.00164085	ENSG00000074054.18	CLASP1
600.877	0.0933895	0.0941331	0.992101	0.321148	0.696125	ENSG00000074071.14	MRPS34
104.356	0.250171	0.218365	1.14566	0.251938	0.621174	ENSG00000074181.9	NOTCH3
2577.92	0.0538284	0.050302	1.0701	0.284572	0.657929	ENSG00000074201.8	CLNS1A
25.683	-0.139675	0.427621	-0.326631	0.743947	0.930402	ENSG00000074211.14	PPP2R2C
283	-0.134121	0.130904	-1.02457	0.305565	0.680032	ENSG00000074219.13	TEAD2
591.835	0.123125	0.0934918	1.31696	0.18785	0.533713	ENSG00000074266.20	EED
4.922	0.160958	0.963774	0.167009	0.867363	NA	ENSG00000074276.10	CDHR2
6.04165	0.484257	0.867421	0.558272	0.576658	NA	ENSG00000074317.11	SNCB
916.997	0.0201172	0.0774773	0.259653	0.795131	0.947353	ENSG00000074319.13	TSG101
1154.31	-0.108373	0.0688369	-1.57434	0.115408	0.405596	ENSG00000074356.17	NCBP3
2.95468	1.89871	1.31095	1.44835	0.14752	NA	ENSG00000074370.18	ATP2A3
5.75162	-0.269257	0.914365	-0.294475	0.768395	NA	ENSG00000074410.14	CA12
3.82142	0.075618	1.08492	0.0696991	0.944433	NA	ENSG00000074416.14	MGLL
450.613	-0.0930768	0.107037	-0.869573	0.384534	0.749073	ENSG00000074582.14	BCS1L
84.7807	-0.31897	0.237627	-1.34231	0.179495	0.520537	ENSG00000074590.13	NUAK1
618.257	-0.348185	0.0903328	-3.85446	0.000115983	0.00184993	ENSG00000074603.19	DPP8
69.5143	-0.0449302	0.267179	-0.168165	0.866453	0.969456	ENSG00000074621.14	SLC24A1
195.166	-0.345853	0.161978	-2.13519	0.0327459	0.175492	ENSG00000074657.13	ZNF532
15.263	0.254093	0.560567	0.453277	0.650349	0.896041	ENSG00000074660.16	SCARF1
4789.74	-0.115701	0.0473137	-2.44541	0.0144688	0.0968294	ENSG00000074695.6	LMAN1
4543.92	-0.0625246	0.050064	-1.24889	0.211704	0.568761	ENSG00000074696.13	HACD3
0.33219	0.18064	3.87013	0.0466754	0.962772	NA	ENSG00000074706.13	IPCEF1
707.723	-0.459346	0.0951506	-4.82757	1.38209e-06	3.72581e-05	ENSG00000074755.15	ZZEF1
1.02598	1.21102	2.35832	0.513511	0.607594	NA	ENSG00000074771.3	NOX3
27598.2	0.125282	0.0320158	3.91314	9.11034e-05	0.00150506	ENSG00000074800.15	ENO1
1043.85	0.0960176	0.0734886	1.30657	0.19136	0.538623	ENSG00000074842.7	MYDGF
60.1029	0.0581525	0.279151	0.208319	0.83498	0.960055	ENSG00000074855.11	ANO8
144.486	0.162893	0.188065	0.86615	0.386408	0.751288	ENSG00000074935.14	TUBE1
51.6159	-0.353166	0.298445	-1.18335	0.23667	0.60094	ENSG00000074964.17	ARHGEF10L
2.98757	0.479273	1.20863	0.396544	0.691704	NA	ENSG00000074966.11	TXK
359.078	0.0159571	0.117641	0.135643	0.892104	0.975964	ENSG00000075043.18	KCNQ2
5.37026	0.727021	0.947609	0.767217	0.442953	NA	ENSG00000075073.14	TACR2
551.987	0.0430556	0.105765	0.407085	0.683945	0.908429	ENSG00000075089.9	ACTR6
385.865	-0.048537	0.123355	-0.393475	0.693968	0.912442	ENSG00000075131.10	TIPIN
961.076	0.0890438	0.0759244	1.17279	0.240878	0.606746	ENSG00000075142.13	SRI
1595.38	-0.14234	0.0627764	-2.26741	0.0233654	0.1386	ENSG00000075151.20	EIF4G3
854.69	0.0524658	0.0821485	0.638671	0.523037	0.841404	ENSG00000075188.9	NUP37
6389.85	-0.185756	0.0444159	-4.18219	2.88712e-05	0.000549454	ENSG00000075213.11	SEMA3A
942.688	-0.0940683	0.0788197	-1.19346	0.232688	0.596403	ENSG00000075218.19	GTSE1
2144.19	-0.140644	0.0616051	-2.28299	0.022431	0.134286	ENSG00000075223.14	SEMA3C
343.165	-0.0276986	0.117155	-0.236427	0.813102	0.952525	ENSG00000075234.17	TTC38
2564.51	0.0644287	0.0534482	1.20544	0.228033	0.589655	ENSG00000075239.13	ACAT1
174.686	0.0294926	0.168267	0.175272	0.860866	0.968377	ENSG00000075240.17	GRAMD4
164.887	-0.0965217	0.174547	-0.552982	0.580275	0.868662	ENSG00000075275.16	CELSR1
1.05343	1.12778	2.19099	0.514735	0.606738	NA	ENSG00000075290.7	WNT8B
1948.45	-0.242898	0.057323	-4.23735	2.26171e-05	0.000448925	ENSG00000075292.19	ZNF638
552.489	-0.0279434	0.0985714	-0.283484	0.776806	0.940851	ENSG00000075303.13	SLC25A40
662.989	-0.00178528	0.0884002	-0.0201955	0.983887	0.995216	ENSG00000075336.12	TIMM21
218.745	-0.0367186	0.154166	-0.238176	0.811745	0.952343	ENSG00000075340.23	ADD2
1369.91	-0.405396	0.0688569	-5.88752	3.92027e-09	1.79262e-07	ENSG00000075391.16	RASAL2
73.6619	0.189686	0.260668	0.727692	0.466802	0.808647	ENSG00000075399.14	VPS9D1
421.773	-0.0849685	0.107467	-0.790648	0.42915	0.784149	ENSG00000075407.18	ZNF37A
749.366	0.0410652	0.0810306	0.506786	0.612305	0.88456	ENSG00000075413.18	MARK3
5923.05	0.197756	0.0361028	5.47759	4.31152e-08	1.63642e-06	ENSG00000075415.12	SLC25A3
612.981	-0.365175	0.094366	-3.86977	0.000108939	0.00175218	ENSG00000075420.13	FNDC3B
1668.07	-0.323836	0.0651846	-4.96798	6.7653e-07	1.9577e-05	ENSG00000075426.12	FOSL2
110.012	-0.119026	0.203288	-0.585504	0.558209	0.859697	ENSG00000075461.6	CACNG4
1522.84	-0.420336	0.0597759	-7.03187	2.03786e-12	1.49198e-10	ENSG00000075539.14	FRYL
645.267	-0.300327	0.0900316	-3.33579	0.00085057	0.00984105	ENSG00000075568.17	TMEM131
197.61	0.272473	0.153734	1.77237	0.0763332	0.312756	ENSG00000075618.18	FSCN1
61546.2	-0.0331657	0.0273322	-1.21343	0.224965	0.585557	ENSG00000075624.15	ACTB
2.38585	0.978911	1.43465	0.682334	0.495028	NA	ENSG00000075643.6	MOCOS
3.07328	0.500589	1.22935	0.407197	0.683864	NA	ENSG00000075651.16	PLD1
489.25	-0.143166	0.101311	-1.41314	0.157615	0.481471	ENSG00000075702.18	WDR62
5804.38	-0.202286	0.0469912	-4.30476	1.67165e-05	0.000345096	ENSG00000075711.20	DLG1
4416.08	0.0616314	0.0401657	1.53443	0.124924	0.423302	ENSG00000075785.12	RAB7A
1363.26	-0.0609003	0.0750733	-0.811211	0.417245	0.772297	ENSG00000075790.10	BCAP29
36.2122	0.146869	0.366045	0.401231	0.68825	0.91035	ENSG00000075826.17	SEC31B
888.915	-0.107683	0.0751723	-1.43248	0.152005	0.472569	ENSG00000075856.12	SART3
3.83408	0.795486	1.09024	0.729643	0.465608	NA	ENSG00000075884.14	ARHGAP15
2.79113	-1.07767	1.28536	-0.838422	0.401794	NA	ENSG00000075886.11	TUBA3D
14.584	-0.404671	0.571877	-0.707619	0.479182	0.816908	ENSG00000075891.21	PAX2
536.397	0.147124	0.101628	1.44768	0.147706	0.463784	ENSG00000075914.13	EXOSC7
213.839	-0.0119999	0.151292	-0.079316	0.936781	0.983516	ENSG00000075945.13	KIFAP3
555.656	0.0541635	0.10048	0.539045	0.589856	0.874382	ENSG00000075975.16	MKRN2
4563.6	-0.00111852	0.0437485	-0.0255671	0.979603	0.993701	ENSG00000076003.5	MCM6
856.997	0.0583275	0.0807869	0.721991	0.4703	0.810743	ENSG00000076043.10	REXO2
630.639	-0.0954462	0.0930212	-1.02607	0.304859	0.680032	ENSG00000076053.10	RBM7
270.184	0.0277511	0.1576	0.176086	0.860227	0.968377	ENSG00000076067.13	RBMS2
1008.02	-0.241768	0.0779501	-3.10157	0.00192498	0.0197329	ENSG00000076108.11	BAZ2A
148.833	-0.140268	0.176917	-0.792846	0.427868	0.783053	ENSG00000076201.15	PTPN23
461.088	0.16355	0.105623	1.54843	0.121519	0.417329	ENSG00000076242.14	MLH1
819.068	0.0665503	0.0796693	0.835332	0.403531	0.763415	ENSG00000076248.10	UNG
14.6387	0.534906	0.561045	0.953411	0.340382	0.713506	ENSG00000076258.10	FMO4
301.681	0.0241972	0.130647	0.185211	0.853064	0.965475	ENSG00000076321.11	KLHL20
1.50227	0.556929	1.74438	0.319271	0.749521	NA	ENSG00000076344.16	RGS11
152.881	0.0147107	0.177249	0.0829943	0.933856	0.982598	ENSG00000076351.13	SLC46A1
0.471781	0.97761	3.38585	0.288733	0.772785	NA	ENSG00000076356.7	PLXNA2
4298.39	-0.05233	0.0435598	-1.20134	0.229621	0.592424	ENSG00000076382.17	SPAG5
551.227	0.118048	0.0945971	1.2479	0.212067	0.568878	ENSG00000076513.16	ANKRD13A
602.999	-0.124251	0.100111	-1.24113	0.214559	0.572073	ENSG00000076554.15	TPD52
105.783	0.141128	0.21302	0.66251	0.507645	0.833916	ENSG00000076555.15	ACACB
469.675	0.661771	0.104724	6.31918	2.62955e-10	1.46794e-08	ENSG00000076604.15	TRAF4
203.79	-0.0753654	0.160268	-0.470247	0.638179	0.891937	ENSG00000076650.6	GPATCH1
115.965	0.191345	0.228793	0.836323	0.402973	0.763148	ENSG00000076662.10	ICAM3
1719.66	0.003698	0.0584302	0.0632891	0.949536	0.985352	ENSG00000076685.18	NT5C2
3.05323	0.882173	1.26288	0.698538	0.484841	NA	ENSG00000076706.17	MCAM
2.13921	-0.0275864	1.4387	-0.0191745	0.984702	NA	ENSG00000076770.14	MBNL3
22.7351	0.416781	0.465009	0.896287	0.3701	0.738766	ENSG00000076826.9	CAMSAP3
43.4575	-0.0453821	0.333466	-0.136092	0.891748	0.975964	ENSG00000076864.19	RAP1GAP
456.802	-0.0635761	0.103517	-0.614158	0.539111	0.849966	ENSG00000076924.12	XAB2
235.495	-0.0549677	0.145131	-0.378745	0.704877	0.915643	ENSG00000076928.17	ARHGEF1
4.91095	-0.200813	0.980331	-0.204842	0.837696	NA	ENSG00000076944.16	STXBP2
385.229	-0.0300125	0.122464	-0.245071	0.806401	0.950304	ENSG00000076984.17	MAP2K7
523.725	-0.178569	0.0973416	-1.83446	0.0665864	0.287226	ENSG00000077044.10	DGKD
3.14121	0.0392668	1.17505	0.033417	0.973342	NA	ENSG00000077092.19	RARB
1500.89	-0.183264	0.0653621	-2.80383	0.00504997	0.043483	ENSG00000077097.15	TOP2B
4098.22	-0.131419	0.0494911	-2.65541	0.00792114	0.0612391	ENSG00000077147.16	TM9SF3
172.119	0.146413	0.162007	0.903745	0.366131	0.736038	ENSG00000077150.19	NFKB2
439.01	0.155376	0.106172	1.46344	0.143346	0.457275	ENSG00000077152.10	UBE2T
211.418	-0.39765	0.163645	-2.42995	0.0151009	0.10011	ENSG00000077157.22	PPP1R12B
1433.25	-0.0846061	0.0633013	-1.33656	0.181366	0.523919	ENSG00000077232.18	DNAJC10
1861.37	-0.185014	0.0624991	-2.96026	0.00307378	0.0289614	ENSG00000077235.18	GTF3C1
68.7273	-0.249913	0.261005	-0.957502	0.338314	0.71249	ENSG00000077238.14	IL4R
954.313	-0.19006	0.0757439	-2.50925	0.0120988	0.0844272	ENSG00000077254.14	USP33
890.609	0.0747055	0.0783919	0.952975	0.340603	0.713506	ENSG00000077312.9	SNRPA
346.857	-0.029158	0.118426	-0.246213	0.805517	0.950133	ENSG00000077348.9	EXOSC5
2101.67	-0.0607541	0.0592807	-1.02486	0.305431	0.680032	ENSG00000077380.15	DYNC1I2
214.54	0.0900993	0.147848	0.609406	0.542255	0.851762	ENSG00000077454.16	LRCH4
278.26	0.136081	0.133866	1.01655	0.30937	0.683486	ENSG00000077458.13	FAM76B
171.195	0.155252	0.165613	0.937439	0.348533	0.721403	ENSG00000077463.15	SIRT6
750.221	-0.176774	0.0826971	-2.13761	0.0325482	0.174795	ENSG00000077514.8	POLD3
2737.11	-0.011428	0.0477715	-0.239221	0.810934	0.952188	ENSG00000077549.18	CAPZB
114.641	-0.00155039	0.203719	-0.00761042	0.993928	0.998266	ENSG00000077585.14	GPR137B
13.5002	1.8436	0.617805	2.98411	0.00284401	0.0272756	ENSG00000077616.11	NAALAD2
781.5	-0.301523	0.084045	-3.58764	0.000333683	0.00452958	ENSG00000077684.16	JADE1
372.182	-0.0836391	0.115575	-0.723681	0.469262	0.810202	ENSG00000077713.19	SLC25A43
1551.43	0.146577	0.0637156	2.30049	0.0214203	0.129801	ENSG00000077721.16	UBE2A
185.373	0.16476	0.166349	0.990447	0.321955	0.69668	ENSG00000077782.20	FGFR1
1.18178	-0.364766	2.22505	-0.163936	0.869781	NA	ENSG00000077800.13	FKBP6
6.85445	-0.248631	0.808537	-0.307507	0.758457	NA	ENSG00000077935.17	SMC1B
78.2464	-0.058717	0.253849	-0.231307	0.817076	0.954253	ENSG00000077942.19	FBLN1
0.622797	-2.6739	2.7585	-0.969331	0.33238	NA	ENSG00000077984.6	CST7
882.481	-0.0830337	0.0762884	-1.08842	0.27641	0.65028	ENSG00000078018.19	MAP2
629.413	-0.146596	0.0950518	-1.54227	0.123008	0.419888	ENSG00000078043.16	PIAS2
716.261	0.00144993	0.0864931	0.0167636	0.986625	0.995923	ENSG00000078061.13	ARAF
941.747	-0.0303375	0.081122	-0.373973	0.708424	0.917353	ENSG00000078070.13	MCCC1
24.0356	0.252902	0.446671	0.566194	0.571262	0.864429	ENSG00000078081.8	LAMP3
103.616	0.124566	0.209666	0.59412	0.552432	0.857745	ENSG00000078114.18	NEBL
1287.13	-0.0815353	0.0715487	-1.13958	0.254462	0.624984	ENSG00000078124.12	ACER3
1640.92	-0.134111	0.0649412	-2.06512	0.0389117	0.199136	ENSG00000078140.14	UBE2K
870.943	-0.135026	0.0818251	-1.65018	0.0989053	0.369942	ENSG00000078142.13	PIK3C3
118.845	-0.236063	0.198626	-1.18848	0.234645	0.598494	ENSG00000078177.14	N4BP2
738.634	0.182558	0.0846697	2.15612	0.0310745	0.168899	ENSG00000078237.7	TIGAR
689.734	0.0460143	0.0841507	0.546808	0.584511	0.871013	ENSG00000078246.17	TULP3
337.157	-0.271974	0.125946	-2.15945	0.0308152	0.16783	ENSG00000078269.15	SYNJ2
2282.13	-0.024943	0.0533739	-0.467326	0.640267	0.892714	ENSG00000078304.19	PPP2R5C
171.935	0.11216	0.164745	0.680811	0.495991	0.826734	ENSG00000078319.9	PMS2P1
5367.36	-0.0474757	0.0371443	-1.27814	0.201199	0.552504	ENSG00000078369.18	GNB1
0.631509	-1.2482	2.80664	-0.44473	0.656515	NA	ENSG00000078401.7	EDN1
632.2	-0.146456	0.0869823	-1.68374	0.0922316	0.35276	ENSG00000078403.17	MLLT10
102.798	0.0393947	0.223546	0.176227	0.860116	0.968377	ENSG00000078487.17	ZCWPW1
23.6395	-0.477585	0.449491	-1.0625	0.288008	0.660588	ENSG00000078589.13	P2RY10
1.11022	-0.237011	2.0916	-0.113316	0.90978	NA	ENSG00000078596.11	ITM2A
4326.83	-0.0574649	0.0437675	-1.31296	0.189197	0.535572	ENSG00000078618.21	NRDC
4791.87	0.0890408	0.0433383	2.05455	0.0399221	0.202803	ENSG00000078668.14	VDAC3
2698.24	-0.327492	0.0486109	-6.73699	1.61697e-11	1.06197e-09	ENSG00000078674.17	PCM1
119.578	-0.0726171	0.216926	-0.334756	0.737809	0.928292	ENSG00000078687.17	TNRC6C
195.784	0.0124041	0.153828	0.0806363	0.935731	0.983211	ENSG00000078699.21	CBFA2T2
1915.66	-0.294507	0.0556174	-5.29522	1.18871e-07	4.12598e-06	ENSG00000078747.14	ITCH
5.00405	0.353076	0.944423	0.373853	0.708514	NA	ENSG00000078795.16	PKD2L2
212.633	0.927555	0.160848	5.76667	8.08508e-09	3.49432e-07	ENSG00000078804.13	TP53INP2
1720.65	0.0630115	0.0584254	1.07849	0.280813	0.65523	ENSG00000078808.16	SDF4
3.23122	1.32151	1.22671	1.07728	0.281355	NA	ENSG00000078814.15	MYH7B
59.7501	-0.088874	0.283231	-0.313786	0.753684	0.932578	ENSG00000078900.15	TP73
300.185	-0.0123642	0.126885	-0.0974443	0.922374	0.981435	ENSG00000078902.16	TOLLIP
323.959	-0.0032359	0.12405	-0.0260854	0.979189	0.993701	ENSG00000078967.13	UBE2D4
0.517486	1.13059	3.27357	0.34537	0.729816	NA	ENSG00000079101.16	CLUL1
718.842	-0.0111765	0.0855389	-0.130659	0.896045	0.976371	ENSG00000079134.12	THOC1
11.9795	0.583191	0.631207	0.92393	0.355523	0.72664	ENSG00000079150.18	FKBP7
84.7259	-0.221254	0.232142	-0.953098	0.340541	0.713506	ENSG00000079156.17	OSBPL6
7.73505	-0.149506	0.763873	-0.195721	0.844828	NA	ENSG00000079215.14	SLC1A3
11400	-0.0468481	0.0384193	-1.21939	0.222696	0.582803	ENSG00000079246.16	XRCC5
1.69636	0.761573	1.77448	0.429182	0.667791	NA	ENSG00000079263.19	SP140
262.391	0.0820153	0.133102	0.616185	0.537773	0.849622	ENSG00000079277.20	MKNK1
1.64766	0.186494	1.59314	0.117061	0.906812	NA	ENSG00000079308.19	TNS1
390.374	-0.0789387	0.115999	-0.680509	0.496182	0.826744	ENSG00000079313.15	REXO1
3301.59	0.108021	0.0454	2.37931	0.0173452	0.110749	ENSG00000079332.15	SAR1A
113.204	-0.0672495	0.211384	-0.318138	0.75038	0.931837	ENSG00000079335.20	CDC14A
5.64183	-0.133547	0.894539	-0.149291	0.881324	NA	ENSG00000079337.16	RAPGEF3
5.59584	0.341977	0.902801	0.378795	0.70484	NA	ENSG00000079385.22	CEACAM1
672.023	-0.0882783	0.0864484	-1.02117	0.307175	0.681087	ENSG00000079387.14	SENP1
0.500164	1.05227	3.07897	0.34176	0.732532	NA	ENSG00000079393.20	DUSP13
199.886	-0.0664797	0.166025	-0.40042	0.688848	0.910472	ENSG00000079432.7	CIC
2.3319	0.158574	1.34809	0.117629	0.906362	NA	ENSG00000079435.10	LIPE
2306.91	0.0574257	0.0557818	1.02947	0.303259	0.679669	ENSG00000079459.13	FDFT1
436.109	0.0553771	0.104305	0.530915	0.595477	0.876708	ENSG00000079462.7	PAFAH1B3
235.375	-0.110149	0.146154	-0.753648	0.451061	0.796261	ENSG00000079482.13	OPHN1
1608.36	-0.0595063	0.0620892	-0.958401	0.337861	0.711851	ENSG00000079616.12	KIF22
14.9599	-0.196737	0.580586	-0.33886	0.734716	0.92804	ENSG00000079691.18	CARMIL1
923.353	0.0224794	0.0746625	0.30108	0.763354	0.935174	ENSG00000079739.17	PGM1
3975.88	-0.0291383	0.0491915	-0.592345	0.553619	0.858097	ENSG00000079785.15	DDX1
1648.46	-0.0379202	0.0601641	-0.630279	0.528512	0.844183	ENSG00000079805.16	DNM2
1305.27	-0.0665331	0.0638164	-1.04257	0.297147	0.672269	ENSG00000079819.19	EPB41L2
418.519	-0.00474257	0.109139	-0.0434546	0.965339	0.989511	ENSG00000079950.14	STX7
146.554	-0.0729695	0.179123	-0.407372	0.683735	0.908429	ENSG00000079974.17	RABL2B
759.13	-0.0283334	0.0798664	-0.35476	0.72277	0.923232	ENSG00000079999.14	KEAP1
0.853985	-0.3924	2.51404	-0.156084	0.875967	NA	ENSG00000080007.8	DDX43
169.743	0.202309	0.169088	1.19647	0.231511	0.594632	ENSG00000080031.10	PTPRH
0.300721	-1.63072	3.98052	-0.409676	0.682044	NA	ENSG00000080166.16	DCT
436.557	0.0294683	0.105674	0.278862	0.780351	0.94246	ENSG00000080189.15	SLC35C2
147.314	-0.288531	0.188676	-1.52924	0.126205	0.425357	ENSG00000080200.10	CRYBG3
54.9124	-0.27889	0.301676	-0.924471	0.355241	0.726495	ENSG00000080298.15	RFX3
2674.97	-0.414132	0.0515192	-8.0384	9.10156e-16	9.1002e-14	ENSG00000080345.17	RIF1
899.508	-0.0638463	0.0787085	-0.811175	0.417265	0.772297	ENSG00000080371.6	RAB21
175.75	0.0695984	0.161141	0.43191	0.665807	0.901964	ENSG00000080503.24	SMARCA2
186.514	0.0758079	0.171928	0.440928	0.659265	0.900086	ENSG00000080546.13	SESN1
21.0403	-0.443056	0.47703	-0.928782	0.353002	0.724772	ENSG00000080561.13	MID2
5.24575	-0.332945	0.940017	-0.35419	0.723196	NA	ENSG00000080573.7	COL5A3
304.123	-0.532193	0.17278	-3.08019	0.00206871	0.0209498	ENSG00000080603.17	SRCAP
1414.25	-0.00168487	0.0624737	-0.0269692	0.978484	0.993701	ENSG00000080608.10	PUM3
0.839287	0.780325	2.38583	0.327066	0.743618	NA	ENSG00000080618.15	CPB2
12.6936	0.262167	0.617223	0.424752	0.671018	0.904408	ENSG00000080644.16	CHRNA3
346.195	-0.0888799	0.124628	-0.713161	0.475746	0.814783	ENSG00000080802.18	CNOT4
943.54	0.0994967	0.0736031	1.3518	0.17644	0.515131	ENSG00000080815.19	PSEN1
390.821	-0.0675117	0.109776	-0.614994	0.538559	0.849695	ENSG00000080819.8	CPOX
1213.34	0.173264	0.0679922	2.54829	0.0108253	0.0774272	ENSG00000080822.17	CLDND1
2294.33	-0.164819	0.0510584	-3.22806	0.00124635	0.0136538	ENSG00000080823.23	MOK
60190	0.0552834	0.0377899	1.46292	0.143491	0.45757	ENSG00000080824.18	HSP90AA1
631.995	-0.206458	0.0929264	-2.22174	0.0263011	0.150077	ENSG00000080839.11	RBL1
268.563	-0.0336123	0.132401	-0.253868	0.799597	0.949139	ENSG00000080845.17	DLGAP4
14.9397	-0.302104	0.559214	-0.54023	0.589039	0.874066	ENSG00000080854.14	IGSF9B
28.0603	0.347204	0.400629	0.866648	0.386135	0.751188	ENSG00000080947.14	CROCCP3
2783.82	-0.0301397	0.0593374	-0.507937	0.611497	0.884374	ENSG00000080986.13	NDC80
553.161	-0.309336	0.0974981	-3.17273	0.00151011	0.016083	ENSG00000081014.11	AP4E1
414.264	-0.14738	0.116431	-1.26581	0.205581	0.560515	ENSG00000081019.13	RSBN1
54.2311	-0.0646359	0.317178	-0.203784	0.838522	0.960544	ENSG00000081026.19	MAGI3
95.4855	0.456387	0.227084	2.00977	0.0444556	0.218174	ENSG00000081041.9	CXCL2
2.52731	0.773996	1.32662	0.583434	0.559601	NA	ENSG00000081052.12	COL4A4
1021.64	-0.215336	0.0723227	-2.97743	0.00290678	0.0277782	ENSG00000081059.20	TCF7
812.8	-0.0789718	0.0815777	-0.968055	0.333017	0.707072	ENSG00000081087.15	OSTM1
4.70353	1.03416	1.00051	1.03363	0.30131	NA	ENSG00000081148.12	IMPG2
2015.44	0.0141325	0.0634172	0.222849	0.823653	0.956595	ENSG00000081154.11	PCNP
197.842	-0.0845099	0.153651	-0.550013	0.582311	0.869766	ENSG00000081177.18	EXD2
420.556	0.292541	0.112654	2.59682	0.00940911	0.0696097	ENSG00000081181.8	ARG2
0.300721	-1.63072	3.98052	-0.409676	0.682044	NA	ENSG00000081237.20	PTPRC
966.024	-0.0838395	0.0754878	-1.11064	0.266725	0.639166	ENSG00000081307.12	UBA5
540.779	0.27706	0.0962726	2.87787	0.00400369	0.0361445	ENSG00000081320.11	STK17B
287.06	-0.303834	0.128992	-2.35546	0.0184998	0.115964	ENSG00000081377.16	CDC14B
267.744	-0.382302	0.135447	-2.82252	0.00476484	0.0413199	ENSG00000081386.12	ZNF510
43.523	-0.0772112	0.340571	-0.226711	0.820648	0.955012	ENSG00000081665.14	ZNF506
214.232	-0.172527	0.149153	-1.15671	0.24739	0.614599	ENSG00000081692.12	JMJD4
422.478	0.0690135	0.107223	0.643642	0.519807	0.838573	ENSG00000081721.11	DUSP12
605.833	0.0181595	0.0934211	0.194383	0.845876	0.962585	ENSG00000081760.17	AACS
450.659	0.0473102	0.109733	0.431139	0.666368	0.902	ENSG00000081791.9	DELE1
0.330788	0.18064	3.87635	0.0466005	0.962832	NA	ENSG00000081803.16	CADPS2
0.492949	-0.698696	3.33177	-0.209707	0.833896	NA	ENSG00000081853.15	PCDHGA2
714.398	0.0806805	0.0889355	0.90718	0.364312	0.735235	ENSG00000081870.11	HSPB11
152.861	-0.390679	0.197801	-1.97511	0.0482551	0.230924	ENSG00000081913.14	PHLPP1
216.448	-0.186037	0.148018	-1.25686	0.208806	0.56494	ENSG00000081923.13	ATP8B1
3.66282	1.27208	1.14221	1.1137	0.265409	NA	ENSG00000081985.11	IL12RB2
257.833	0.20977	0.133552	1.57069	0.116254	0.407527	ENSG00000082014.16	SMARCD3
845.417	-0.106104	0.0795425	-1.33393	0.182226	0.52482	ENSG00000082068.8	WDR70
1.8827	0.444397	1.59992	0.277763	0.781194	NA	ENSG00000082126.18	MPP4
1035.09	0.0219597	0.0714348	0.307408	0.758533	0.93374	ENSG00000082146.13	STRADB
10830.3	0.0489966	0.0438144	1.11827	0.26345	0.633698	ENSG00000082153.18	BZW1
1.18562	-0.194866	2.2119	-0.0880992	0.929798	NA	ENSG00000082196.20	C1QTNF3
2835.54	0.00145964	0.0480725	0.0303632	0.975777	0.992713	ENSG00000082212.13	ME2
978.292	-0.0733141	0.0776954	-0.94361	0.345369	0.718406	ENSG00000082213.18	C5orf22
853.049	0.318759	0.0805101	3.95924	7.51877e-05	0.00127838	ENSG00000082258.13	CCNT2
90.2026	0.0906609	0.235505	0.384963	0.700265	0.913942	ENSG00000082269.16	FAM135A
0.705509	1.70802	2.91898	0.585144	0.558451	NA	ENSG00000082438.16	COBLL1
112.019	0.131981	0.214184	0.616204	0.53776	0.849622	ENSG00000082458.12	DLG3
190.25	-0.0259488	0.155307	-0.16708	0.867307	0.969511	ENSG00000082512.15	TRAF5
992.137	0.134552	0.0740981	1.81587	0.0693905	0.294673	ENSG00000082515.18	MRPL22
2271.77	-0.199672	0.0505745	-3.94808	7.87817e-05	0.00133104	ENSG00000082516.9	GEMIN5
1952.85	0.119988	0.0598741	2.004	0.0450699	0.220382	ENSG00000082641.16	NFE2L1
892.54	-0.301884	0.0836083	-3.61069	0.000305385	0.00423117	ENSG00000082701.15	GSK3B
404.911	0.00545774	0.116301	0.0469278	0.962571	0.988739	ENSG00000082781.12	ITGB5
1175.56	-0.325576	0.0720897	-4.51626	6.29426e-06	0.000144898	ENSG00000082805.20	ERC1
10078.7	-0.170046	0.0380407	-4.47011	7.81803e-06	0.000175748	ENSG00000082898.16	XPO1
751.018	-0.0616123	0.0900928	-0.683876	0.494053	0.825653	ENSG00000082996.19	RNF13
0.86102	2.08708	2.53069	0.824706	0.409538	NA	ENSG00000083067.22	TRPM3
423.138	-0.363103	0.113947	-3.1866	0.00143954	0.015479	ENSG00000083093.9	PALB2
282.338	-0.444977	0.131701	-3.37869	0.000728328	0.00863552	ENSG00000083097.14	DOP1A
1157.68	-0.0308925	0.0727984	-0.424356	0.671306	0.904408	ENSG00000083099.11	LYRM2
648.2	-0.0853919	0.0892342	-0.956942	0.338597	0.7126	ENSG00000083123.15	BCKDHB
1061.28	-0.44528	0.0849694	-5.24048	1.60158e-07	5.35111e-06	ENSG00000083168.11	KAT6A
494.434	-0.160457	0.103042	-1.5572	0.119424	0.412701	ENSG00000083223.18	TUT7
725.462	-0.113097	0.0868223	-1.30263	0.192702	0.54062	ENSG00000083290.20	ULK2
7637.98	-0.189651	0.0398739	-4.75626	1.97214e-06	5.12069e-05	ENSG00000083312.17	TNPO1
1536.03	0.0540996	0.0646041	0.837402	0.402367	0.762721	ENSG00000083444.17	PLOD1
114.122	0.11606	0.202792	0.572309	0.567112	0.862719	ENSG00000083454.22	P2RX5
301.918	0.19607	0.126289	1.55254	0.120533	0.415354	ENSG00000083457.12	ITGAE
1393.31	-0.00543811	0.0617451	-0.0880735	0.929818	0.98253	ENSG00000083520.15	DIS3
371.616	-0.0937838	0.122758	-0.763976	0.444881	0.791465	ENSG00000083535.16	PIBF1
236.181	-0.175464	0.140126	-1.25219	0.210502	0.567237	ENSG00000083544.14	TDRD3
221.515	-0.00594605	0.143691	-0.0413808	0.966992	0.990103	ENSG00000083635.8	NUFIP1
1123.86	-0.323613	0.0735257	-4.40135	1.07577e-05	0.000231352	ENSG00000083642.19	PDS5B
739.666	0.0122223	0.083479	0.146412	0.883596	0.973314	ENSG00000083720.13	OXCT1
208.832	-0.0524901	0.149185	-0.351845	0.724954	0.924457	ENSG00000083750.12	RRAGB
900.63	-0.128368	0.0799681	-1.60524	0.10844	0.39077	ENSG00000083799.17	CYLD
88.9392	-0.0454705	0.234179	-0.194169	0.846043	0.962657	ENSG00000083807.10	SLC27A5
129.58	0.186756	0.200485	0.931519	0.351585	0.723377	ENSG00000083812.12	ZNF324
2.89503	-0.550119	1.35696	-0.405405	0.68518	NA	ENSG00000083814.13	ZNF671
103.434	-0.067485	0.210858	-0.32005	0.748931	0.931305	ENSG00000083817.9	ZNF416
88.2387	0.0689802	0.232426	0.296783	0.766632	0.936909	ENSG00000083828.16	ZNF586
57.0013	0.26167	0.297434	0.879759	0.37899	0.745519	ENSG00000083838.15	ZNF446
251.248	-0.31912	0.153694	-2.07634	0.0378628	0.195712	ENSG00000083844.10	ZNF264
9481.82	0.18206	0.039151	4.65019	3.31624e-06	8.21275e-05	ENSG00000083845.9	RPS5
1177.7	-0.461779	0.0818611	-5.64101	1.69056e-08	6.99076e-07	ENSG00000083857.14	FAT1
1225.58	0.0485446	0.0658444	0.737263	0.460963	0.804003	ENSG00000083896.12	YTHDC1
521.023	0.139202	0.0989529	1.40675	0.159501	0.484306	ENSG00000083937.9	CHMP2B
431.595	-0.118863	0.107038	-1.11047	0.266796	0.639222	ENSG00000084070.12	SMAP2
852.148	0.0707764	0.0831745	0.85094	0.394803	0.757462	ENSG00000084072.16	PPIE
3218.8	-0.00478517	0.056009	-0.0854356	0.931915	0.982536	ENSG00000084073.9	ZMPSTE24
3902.19	0.0155393	0.0423585	0.366851	0.71373	0.919599	ENSG00000084090.13	STARD7
268.435	0.166995	0.132314	1.26211	0.206907	0.562416	ENSG00000084092.7	NOA1
1116.1	-0.406738	0.0838748	-4.84935	1.2387e-06	3.38006e-05	ENSG00000084093.17	REST
3.00997	0.521441	1.23043	0.423787	0.671721	NA	ENSG00000084110.11	HAL
535.027	-0.241645	0.101106	-2.39002	0.0168475	0.108228	ENSG00000084112.15	SSH1
3453.13	0.22493	0.0441568	5.09388	3.50801e-07	1.07307e-05	ENSG00000084207.16	GSTP1
9922.08	-0.0125368	0.0316894	-0.395614	0.69239	0.911715	ENSG00000084234.17	APLP2
218.084	0.0260345	0.150387	0.173117	0.86256	0.968431	ENSG00000084444.14	FAM234B
2328.6	-0.0486646	0.0513603	-0.947514	0.343377	0.716375	ENSG00000084463.8	WBP11
4312.21	0.0405589	0.0404881	1.00175	0.316466	0.690517	ENSG00000084623.11	EIF3I
22.8088	0.106742	0.469752	0.22723	0.820245	0.954733	ENSG00000084628.10	NKAIN1
0.825326	0.714975	2.39645	0.298348	0.765438	NA	ENSG00000084636.18	COL16A1
2633.54	0.187685	0.0748646	2.50699	0.0121765	0.0845465	ENSG00000084652.16	TXLNA
463.947	-0.158916	0.105284	-1.50941	0.131195	0.434227	ENSG00000084676.15	NCOA1
463.011	0.0530242	0.103218	0.513712	0.607453	0.88204	ENSG00000084693.16	AGBL5
42.2711	0.29674	0.331442	0.895302	0.370626	0.739155	ENSG00000084710.14	EFR3B
254.828	-0.0399193	0.136138	-0.293227	0.769349	0.937659	ENSG00000084731.15	KIF3C
3060.86	0.00184326	0.0516663	0.0356763	0.97154	0.991051	ENSG00000084733.11	RAB10
4806.53	-0.0106815	0.0430618	-0.248051	0.804095	0.949856	ENSG00000084754.12	HADHA
135.205	0.0519229	0.186413	0.278537	0.7806	0.94246	ENSG00000084764.11	MAPRE3
1334.17	-0.124578	0.0697234	-1.78674	0.0739792	0.306865	ENSG00000084774.14	CAD
3290.93	0.0754671	0.0466392	1.61811	0.10564	0.384296	ENSG00000085063.16	CD59
145.6	-0.0141775	0.186896	-0.0758577	0.939532	0.983671	ENSG00000085117.12	CD82
225.241	0.0926055	0.154183	0.60062	0.548093	0.855071	ENSG00000085185.15	BCORL1
3492.13	-0.350456	0.0439463	-7.97464	1.52826e-15	1.48375e-13	ENSG00000085224.22	ATRX
872.042	0.169544	0.0752214	2.25394	0.0242001	0.142227	ENSG00000085231.14	AK6
476.897	0.146516	0.107703	1.36037	0.173712	0.509947	ENSG00000085274.15	MYNN
1.94425	-0.280547	1.57231	-0.17843	0.858385	NA	ENSG00000085276.18	MECOM
1002.88	-0.252806	0.0819236	-3.08588	0.00202951	0.0206151	ENSG00000085365.18	SCAMP1
644.799	-0.0485404	0.0864434	-0.561528	0.574438	0.865922	ENSG00000085377.14	PREP
259.625	-0.200027	0.141619	-1.41243	0.157824	0.481634	ENSG00000085382.12	HACE1
2826.68	-0.0296722	0.0469115	-0.632514	0.527051	0.843055	ENSG00000085415.16	SEH1L
592.581	0.427583	0.0921769	4.63873	3.50561e-06	8.60224e-05	ENSG00000085433.15	WDR47
746.213	-0.0716405	0.0841521	-0.851323	0.39459	0.757462	ENSG00000085449.15	WDFY1
4.72769	1.49397	1.02108	1.46313	0.143433	NA	ENSG00000085465.12	OVGP1
763.09	-0.155341	0.0813425	-1.90971	0.0561703	0.256325	ENSG00000085491.17	SLC25A24
601.477	-0.170915	0.0929524	-1.83873	0.0659543	0.285788	ENSG00000085511.20	MAP3K4
4.34781	0.378847	1.05035	0.360685	0.718335	NA	ENSG00000085514.16	PILRA
0.654266	-1.30149	2.60968	-0.498716	0.61798	NA	ENSG00000085552.17	IGSF9
37.1776	0.0382947	0.361484	0.105938	0.915632	0.979452	ENSG00000085644.13	ZNF213
118.412	0.273802	0.202182	1.35423	0.175662	0.513757	ENSG00000085662.14	AKR1B1
2044.63	-0.103683	0.068153	-1.52133	0.128177	0.42879	ENSG00000085719.13	CPNE3
2031.05	0.00523564	0.0581805	0.0899895	0.928296	0.98238	ENSG00000085721.12	RRN3
3082.76	-0.0152121	0.0547943	-0.277621	0.781303	0.94246	ENSG00000085733.16	CTTN
1.46986	-0.158412	1.85966	-0.0851835	0.932115	NA	ENSG00000085741.13	WNT11
1374.99	-0.0782402	0.0724103	-1.08051	0.279914	0.654044	ENSG00000085760.14	MTIF2
701.179	-0.0537288	0.0887164	-0.605624	0.544764	0.853766	ENSG00000085788.13	DDHD2
61.946	0.111198	0.275441	0.40371	0.686426	0.910243	ENSG00000085831.15	TTC39A
1842.74	-0.0858031	0.0602724	-1.42359	0.154566	0.476595	ENSG00000085832.17	EPS15
587.558	0.0548502	0.0936568	0.585651	0.55811	0.859697	ENSG00000085840.13	ORC1
146.863	0.13255	0.179787	0.73726	0.460964	0.804003	ENSG00000085871.9	MGST2
443.226	-0.0578867	0.104152	-0.55579	0.578354	0.868115	ENSG00000085872.15	CHERP
649.239	0.0379517	0.0902635	0.420455	0.674153	0.905585	ENSG00000085978.22	ATG16L1
738.52	-0.23488	0.0829816	-2.8305	0.00464747	0.0406442	ENSG00000085982.13	USP40
836.75	-0.0171835	0.0789025	-0.217781	0.8276	0.956931	ENSG00000085998.14	POMGNT1
327.324	-0.0344308	0.134689	-0.255632	0.798235	0.948579	ENSG00000085999.12	RAD54L
963.587	-0.225812	0.072493	-3.11494	0.00183981	0.018976	ENSG00000086015.21	MAST2
7030.2	0.336755	0.048092	7.00231	2.5178e-12	1.81363e-10	ENSG00000086061.16	DNAJA1
248.551	-0.162148	0.142077	-1.14127	0.253758	0.623682	ENSG00000086062.12	B4GALT1
877.481	0.084465	0.0887589	0.951623	0.341288	0.713636	ENSG00000086065.14	CHMP5
514.009	-0.0943614	0.102984	-0.916271	0.359525	0.730278	ENSG00000086102.19	NFX1
1.92981	1.61312	1.64253	0.982093	0.326054	NA	ENSG00000086159.13	AQP6
1126.91	-0.0355643	0.069342	-0.512883	0.608033	0.882412	ENSG00000086189.10	DIMT1
1882.18	-0.182331	0.0615714	-2.96129	0.0030635	0.0289252	ENSG00000086200.16	IPO11
3058.55	-0.0293913	0.047121	-0.62374	0.532798	0.846048	ENSG00000086232.13	EIF2AK1
274.093	-0.0490714	0.133441	-0.367738	0.713069	0.919509	ENSG00000086289.12	EPDR1
498.392	-0.0375898	0.101127	-0.37171	0.710109	0.918078	ENSG00000086300.15	SNX10
1798.7	-0.0783485	0.0564313	-1.38839	0.16502	0.494284	ENSG00000086475.15	SEPHS1
856.571	0.0498463	0.0795243	0.626806	0.530786	0.845397	ENSG00000086504.16	MRPL28
214.167	0.603234	0.154287	3.90983	9.23622e-05	0.00151837	ENSG00000086544.3	ITPKC
2.16112	-0.0473612	1.42803	-0.0331655	0.973543	NA	ENSG00000086570.12	FAT2
908.291	0.128352	0.0767048	1.67332	0.094264	0.358232	ENSG00000086589.12	RBM22
7106.55	0.0416535	0.0406369	1.02501	0.305356	0.680032	ENSG00000086598.11	TMED2
208.991	-0.0439848	0.153228	-0.287055	0.77407	0.939827	ENSG00000086619.13	ERO1B
509.293	0.000194659	0.111489	0.00174599	0.998607	0.999338	ENSG00000086666.19	ZFAND6
2016.62	0.163396	0.0543373	3.00706	0.00263788	0.0255919	ENSG00000086712.13	TXLNG
1.186	0.685912	2.05291	0.334117	0.738291	NA	ENSG00000086717.18	PPEF1
15.7555	0.440306	0.542296	0.811928	0.416833	0.77227	ENSG00000086730.17	LAT2
2130.34	-0.333247	0.0679636	-4.90331	9.42345e-07	2.63032e-05	ENSG00000086758.16	HUWE1
1581.9	-0.0600632	0.0740092	-0.811565	0.417042	0.772297	ENSG00000086827.9	ZW10
341.902	0.0491437	0.127287	0.386087	0.699432	0.913942	ENSG00000086848.15	ALG9
161.058	0.0491649	0.174524	0.281708	0.778168	0.94139	ENSG00000087008.16	ACOX3
808.562	-0.107581	0.0815693	-1.31889	0.187206	0.532936	ENSG00000087053.18	MTMR2
762.607	1.9031	0.0861383	22.0935	3.64737e-108	6.10843e-105	ENSG00000087074.8	PPP1R15A
20.0227	0.329688	0.484761	0.680105	0.496438	0.826867	ENSG00000087076.9	HSD17B14
1041.59	0.09091	0.0739821	1.22881	0.219143	0.577626	ENSG00000087077.14	TRIP6
21.6158	0.309513	0.456649	0.67779	0.497905	0.827812	ENSG00000087085.15	ACHE
38762.3	0.196071	0.031583	6.20812	5.36217e-10	2.88524e-08	ENSG00000087086.15	FTL
1668.54	0.13609	0.062293	2.18468	0.0289123	0.1606	ENSG00000087087.20	SRRT
964.822	0.106327	0.0788502	1.34847	0.177507	0.516895	ENSG00000087088.20	BAX
305.893	-0.146949	0.128432	-1.14418	0.252549	0.622018	ENSG00000087095.13	NLK
716.713	-0.0339006	0.0838911	-0.404102	0.686137	0.910185	ENSG00000087111.21	PIGS
597.712	-0.0424591	0.0972922	-0.436408	0.662541	0.901395	ENSG00000087152.15	ATXN7L3
227.19	-0.296067	0.144523	-2.04858	0.0405033	0.204779	ENSG00000087157.19	PGS1
2668.28	0.096598	0.0482386	2.0025	0.0452305	0.221006	ENSG00000087191.13	PSMC5
773.114	-0.0362531	0.0818918	-0.442695	0.657986	0.899469	ENSG00000087206.17	UIMC1
9.98752	-0.139799	0.676201	-0.206742	0.836211	NA	ENSG00000087258.15	GNAO1
2040.83	0.0285006	0.0530221	0.537523	0.590907	0.874856	ENSG00000087263.16	OGFOD1
312.602	-0.0916077	0.130788	-0.700428	0.48366	0.818708	ENSG00000087266.16	SH3BP2
1119.01	-0.0716108	0.0706116	-1.01415	0.310511	0.684698	ENSG00000087269.16	NOP14
1146.47	-0.107905	0.0680599	-1.58544	0.112865	0.400052	ENSG00000087274.17	ADD1
436.282	-0.106092	0.105419	-1.00638	0.314231	0.687695	ENSG00000087299.12	L2HGDH
242.088	-0.140448	0.154386	-0.909721	0.362969	0.733937	ENSG00000087301.9	TXNDC16
1558.53	0.178284	0.0613386	2.90655	0.00365439	0.0335583	ENSG00000087302.9	RTRAF
1.15864	1.49928	2.12058	0.707014	0.479558	NA	ENSG00000087303.18	NID2
313.772	-0.0798991	0.124387	-0.642342	0.520651	0.838899	ENSG00000087338.5	GMCL1
2747.79	-0.0209828	0.0463746	-0.452464	0.650935	0.896104	ENSG00000087365.15	SF3B2
481.565	-0.219174	0.10806	-2.02827	0.0425327	0.212078	ENSG00000087448.11	KLHL42
6010.86	0.0904208	0.0377853	2.39301	0.0167106	0.107961	ENSG00000087460.24	GNAS
3969.09	-0.0492649	0.0455504	-1.08155	0.279454	0.653538	ENSG00000087470.17	DNM1L
0.637219	-2.70161	2.7385	-0.98653	0.323873	NA	ENSG00000087494.15	PTHLH
1970.52	0.0105235	0.0672272	0.156536	0.87561	0.970509	ENSG00000087502.18	ERGIC2
4540.9	0.0284947	0.0420322	0.677926	0.497819	0.827812	ENSG00000087586.17	AURKA
1.19293	0.670769	2.04924	0.327326	0.743421	NA	ENSG00000087589.16	CASS4
223.821	0.0588517	0.150514	0.391003	0.695795	0.912442	ENSG00000087842.11	PIR
150.749	0.276074	0.180077	1.53309	0.125255	0.423918	ENSG00000087884.14	AAMDC
80.3158	-0.0937383	0.24342	-0.385089	0.700172	0.913942	ENSG00000087903.13	RFX2
514.01	0.0779446	0.0988858	0.788229	0.430563	0.785023	ENSG00000087995.15	METTL2A
14.9597	0.28607	0.570695	0.501266	0.616184	0.884817	ENSG00000088002.11	SULT2B1
404.991	-0.0186218	0.112686	-0.165253	0.868745	0.969792	ENSG00000088035.17	ALG6
382.289	0.0456372	0.116544	0.391589	0.695362	0.912442	ENSG00000088038.19	CNOT3
1.01175	2.36187	2.3751	0.994429	0.320014	NA	ENSG00000088053.11	GP6
375.828	-0.249851	0.112851	-2.214	0.0268291	0.152312	ENSG00000088179.9	PTPN4
4078.93	-0.0911707	0.0476978	-1.91143	0.0559498	0.255667	ENSG00000088205.13	DDX18
3198.23	-0.0415219	0.0480019	-0.865004	0.387036	0.751742	ENSG00000088247.17	KHSRP
1434.48	-0.15332	0.0654307	-2.34324	0.0191169	0.118688	ENSG00000088256.9	GNA11
85.8521	-0.0647228	0.230325	-0.281006	0.778706	0.941628	ENSG00000088280.19	ASAP3
182.761	0.00421091	0.16657	0.0252801	0.979832	0.993701	ENSG00000088298.13	EDEM2
113.993	-0.0379664	0.206051	-0.184257	0.853812	0.965475	ENSG00000088305.18	DNMT3B
8274.89	-0.086663	0.0364463	-2.37782	0.0174151	0.111109	ENSG00000088325.16	TPX2
23.7945	0.252993	0.447765	0.565012	0.572065	0.864813	ENSG00000088340.16	FER1L4
544.258	0.404303	0.097209	4.15911	3.19493e-05	0.000602049	ENSG00000088356.6	PDRG1
151.197	-0.228436	0.173606	-1.31583	0.188232	0.533968	ENSG00000088367.22	EPB41L1
181.37	-0.233546	0.160815	-1.45227	0.146427	0.461717	ENSG00000088387.19	DOCK9
177.27	0.0793554	0.162835	0.487337	0.62602	0.88759	ENSG00000088448.14	ANKRD10
238.464	0.0770908	0.152413	0.505801	0.612996	0.88456	ENSG00000088451.11	TGDS
7.64578	-0.0033362	0.784875	-0.00425061	0.996609	NA	ENSG00000088538.13	DOCK3
22.3131	0.20524	0.455086	0.450992	0.651996	0.89631	ENSG00000088543.15	C3orf18
1143.97	0.0346999	0.06801	0.510218	0.609899	0.883456	ENSG00000088682.14	COQ9
47.102	0.147098	0.311462	0.472282	0.636726	0.89149	ENSG00000088726.16	TMEM40
124.991	0.308289	0.196011	1.57281	0.115763	0.406444	ENSG00000088727.12	KIF9
0.353545	0.18064	3.77969	0.0477923	0.961882	NA	ENSG00000088756.12	ARHGAP28
966.751	0.0825455	0.0725176	1.13828	0.255002	0.625622	ENSG00000088766.11	CRLS1
176.616	-0.0280678	0.171611	-0.163555	0.870082	0.97013	ENSG00000088808.17	PPP1R13B
607.926	-0.191313	0.0906389	-2.11072	0.0347967	0.184235	ENSG00000088812.18	ATRN
92.8084	0.113468	0.227883	0.497921	0.61854	0.884817	ENSG00000088826.18	SMOX
0.510183	2.57432	3.22021	0.799426	0.424044	NA	ENSG00000088827.12	SIGLEC1
3455.5	0.0752129	0.0458979	1.6387	0.101276	0.375389	ENSG00000088832.17	FKBP1A
1124.65	0.0753215	0.0696917	1.08078	0.279794	0.653977	ENSG00000088833.17	NSFL1C
43.5707	0.216537	0.328789	0.65859	0.510159	0.835751	ENSG00000088836.13	SLC4A11
253.041	-0.133975	0.137641	-0.973367	0.330371	0.705533	ENSG00000088854.12	C20orf194
168.32	-0.192462	0.170792	-1.12688	0.259794	0.630347	ENSG00000088876.11	ZNF343
12.5618	0.0649212	0.603682	0.107542	0.914359	0.979452	ENSG00000088881.20	EBF4
1956.13	-0.263656	0.0699288	-3.77035	0.00016302	0.00249616	ENSG00000088888.18	MAVS
144.588	-0.15081	0.178904	-0.842963	0.399249	0.759887	ENSG00000088899.15	LZTS3
3448.8	-0.028995	0.0497114	-0.583267	0.559713	0.860598	ENSG00000088930.8	XRN2
157.895	0.086236	0.177271	0.486464	0.626638	0.888058	ENSG00000088970.16	KIZ
4871.46	0.270607	0.0469853	5.75941	8.44084e-09	3.62469e-07	ENSG00000088986.11	DYNLL1
49.8781	0.0458925	0.301704	0.152111	0.8791	0.971887	ENSG00000088992.18	TESC
2667.63	0.169423	0.0493709	3.43163	0.000599956	0.0073745	ENSG00000089006.16	SNX5
22411.2	0.1294	0.0381297	3.39369	0.000689586	0.00828617	ENSG00000089009.15	RPL6
495.614	-0.00135219	0.0976618	-0.0138456	0.988953	0.99656	ENSG00000089022.14	MAPKAPK5
1298.66	0.0790295	0.0736762	1.07266	0.283424	0.657543	ENSG00000089048.14	ESF1
769.303	0.0315932	0.0879965	0.359028	0.719574	0.921776	ENSG00000089050.16	RBBP9
4031.55	0.000494055	0.0424387	0.0116416	0.990712	0.997253	ENSG00000089053.13	ANAPC5
487.761	-0.172057	0.100313	-1.7152	0.0863079	0.338397	ENSG00000089057.15	SLC23A2
90.0841	0.130305	0.234249	0.556267	0.578028	0.868115	ENSG00000089060.11	SLC8B1
1826.83	0.0563153	0.0559002	1.00743	0.31373	0.687384	ENSG00000089063.15	TMEM230
15.242	0.10545	0.546163	0.193075	0.8469	0.963003	ENSG00000089091.16	DZANK1
361.839	-0.221468	0.117396	-1.88651	0.0592266	0.264859	ENSG00000089094.19	KDM2B
0.889583	0.736972	2.4807	0.297083	0.766403	NA	ENSG00000089101.18	CFAP61
132.774	0.111218	0.186188	0.597342	0.550279	0.85599	ENSG00000089123.16	TASP1
4.08243	-0.190862	1.05175	-0.18147	0.855998	NA	ENSG00000089127.13	OAS1
2045.02	-0.154602	0.0690814	-2.23797	0.0252228	0.146217	ENSG00000089154.11	GCN1
30885.2	0.143692	0.0324321	4.43055	9.39945e-06	0.00020477	ENSG00000089157.16	RPLP0
2711.32	-0.187692	0.0492021	-3.81471	0.000136345	0.00212907	ENSG00000089159.16	PXN
23.882	0.136896	0.43846	0.312219	0.754874	0.932778	ENSG00000089163.4	SIRT4
349.207	-0.249073	0.116267	-2.14225	0.032173	0.173393	ENSG00000089177.18	KIF16B
1066.53	0.00407985	0.0736027	0.0554307	0.955795	0.986433	ENSG00000089195.15	TRMT6
8.47053	0.0203724	0.737429	0.0276262	0.97796	NA	ENSG00000089199.10	CHGB
4855	0.138389	0.0395766	3.49673	0.000470992	0.00602708	ENSG00000089220.5	PEBP1
420.929	0.116775	0.111611	1.04627	0.295436	0.670322	ENSG00000089234.16	BRAP
913.097	0.212013	0.0766089	2.76748	0.00564921	0.0475129	ENSG00000089248.7	ERP29
5010.11	0.0911056	0.039732	2.293	0.021848	0.131805	ENSG00000089280.18	FUS
671.897	0.115139	0.0869739	1.32384	0.185558	0.53052	ENSG00000089289.16	IGBP1
345.283	0.142396	0.129631	1.09847	0.271998	0.645393	ENSG00000089327.14	FXYD5
494.277	0.122196	0.0986566	1.2386	0.215495	0.572812	ENSG00000089335.21	ZNF302
266.932	0.00214241	0.132997	0.0161087	0.987148	0.996093	ENSG00000089351.14	GRAMD1A
48.7117	0.330226	0.324489	1.01768	0.308829	0.682868	ENSG00000089486.17	CDIP1
21.792	-0.143555	0.472526	-0.303803	0.761278	0.935142	ENSG00000089505.17	CMTM1
3937.41	0.0770122	0.0449677	1.71261	0.0867836	0.339969	ENSG00000089597.18	GANAB
81.7461	-0.141637	0.240763	-0.588282	0.556343	0.859159	ENSG00000089639.11	GMIP
228.639	-0.344541	0.144555	-2.38346	0.0171509	0.109789	ENSG00000089682.16	RBM41
3648.77	-0.00056804	0.0430166	-0.0132051	0.989464	0.996755	ENSG00000089685.15	BIRC5
17.4942	0.670591	0.517703	1.29532	0.19521	0.544408	ENSG00000089692.9	LAG3
4638.02	0.116521	0.0398101	2.92691	0.00342343	0.0318522	ENSG00000089693.10	MLF2
18.4247	0.0313809	0.500835	0.0626571	0.95004	0.985391	ENSG00000089723.10	OTUB2
3063.69	0.0711964	0.0467379	1.52331	0.127681	0.428095	ENSG00000089737.17	DDX24
129.664	-0.419534	0.191736	-2.18809	0.0286631	0.15948	ENSG00000089775.11	ZBTB25
783.193	0.0440299	0.0863185	0.510086	0.609991	0.883456	ENSG00000089818.18	NECAP1
6.93601	0.248765	0.81698	0.304493	0.760752	NA	ENSG00000089820.15	ARHGAP4
6.47097	0.633725	0.84977	0.745761	0.455812	NA	ENSG00000089847.12	ANKRD24
902.352	-0.100721	0.074158	-1.35819	0.174402	0.511411	ENSG00000089876.11	DHX32
871.639	-0.400699	0.0807137	-4.96444	6.88989e-07	1.98518e-05	ENSG00000089902.10	RCOR1
737.339	0.142557	0.0844429	1.68821	0.0913706	0.350568	ENSG00000089916.17	GPATCH2L
28.6673	0.758829	0.413517	1.83506	0.0664969	0.28721	ENSG00000090006.17	LTBP4
859.835	0.145191	0.0780897	1.85929	0.0629861	0.276594	ENSG00000090013.10	BLVRB
166.141	0.268787	0.172413	1.55898	0.119002	0.412237	ENSG00000090020.11	SLC9A1
2609.37	0.0354213	0.0488019	0.725817	0.467951	0.809295	ENSG00000090054.15	SPTLC1
5732.74	-0.0775793	0.0446392	-1.73792	0.082225	0.328361	ENSG00000090060.17	PAPOLA
456.135	-0.0446787	0.103132	-0.433221	0.664855	0.901865	ENSG00000090061.17	CCNK
589.204	0.0686175	0.0978107	0.701534	0.48297	0.818708	ENSG00000090097.21	PCBP4
43.9662	0.276407	0.326534	0.846488	0.397281	0.758941	ENSG00000090238.11	YPEL3
826.951	0.141776	0.0870983	1.62777	0.103573	0.380086	ENSG00000090263.16	MRPS33
1168.33	0.146203	0.0738264	1.98036	0.0476632	0.228968	ENSG00000090266.13	NDUFB2
2013.15	0.042639	0.0545274	0.781974	0.43423	0.78619	ENSG00000090273.14	NUDC
723.493	-0.0856484	0.0833165	-1.02799	0.303955	0.679948	ENSG00000090316.16	MAEA
2.16366	1.33115	1.5554	0.85582	0.392097	NA	ENSG00000090339.9	ICAM1
829.149	-0.0515905	0.084432	-0.61103	0.54118	0.851424	ENSG00000090372.15	STRN4
16.9502	0.0561098	0.5422	0.103485	0.917578	0.980203	ENSG00000090382.6	LYZ
355.781	-0.168298	0.120341	-1.3985	0.161962	0.488556	ENSG00000090432.7	MUL1
128.961	-0.204877	0.193708	-1.05766	0.290211	0.66341	ENSG00000090447.12	TFAP4
363.699	-0.0395269	0.121205	-0.326117	0.744336	0.930628	ENSG00000090470.15	PDCD7
873.26	0.0734107	0.0765684	0.958759	0.33768	0.711694	ENSG00000090487.11	SPG21
2037.19	0.144498	0.0538416	2.68376	0.00727983	0.0575089	ENSG00000090520.11	DNAJB11
51.0058	0.0576361	0.306826	0.187846	0.850997	0.964851	ENSG00000090530.10	P3H2
0.900824	3.38202	2.41626	1.39969	0.161606	NA	ENSG00000090534.19	THPO
13.5498	0.427451	0.574299	0.744301	0.456694	0.800365	ENSG00000090539.15	CHRD
10.7082	0.332518	0.67431	0.493124	0.621925	NA	ENSG00000090554.13	FLT3LG
157.005	-0.058147	0.170481	-0.341077	0.733046	0.92768	ENSG00000090565.16	RAB11FIP3
290.908	0.0741002	0.139664	0.530561	0.595723	0.876708	ENSG00000090581.10	GNPTG
417.994	-0.221732	0.10755	-2.06166	0.0392401	0.200434	ENSG00000090612.21	ZNF268
1311.54	-0.150713	0.0904142	-1.66691	0.095532	0.361255	ENSG00000090615.15	GOLGA3
3443.03	0.104316	0.0435295	2.39645	0.0165547	0.107305	ENSG00000090621.14	PABPC4
135.521	0.0185231	0.182939	0.101253	0.91935	0.980586	ENSG00000090661.12	CERS4
167.599	0.184575	0.166549	1.10823	0.267762	0.640689	ENSG00000090674.16	MCOLN1
769.577	-0.104929	0.0798226	-1.31452	0.18867	0.534727	ENSG00000090686.15	USP48
147.308	0.727896	0.178375	4.0807	4.49005e-05	0.000821826	ENSG00000090776.6	EFNB1
2312.42	-0.213128	0.0577414	-3.69108	0.0002233	0.00326257	ENSG00000090857.13	PDPR
2174.4	-0.0302634	0.0564204	-0.536392	0.591688	0.875572	ENSG00000090861.15	AARS
2119.67	0.0150981	0.0603443	0.250198	0.802434	0.949607	ENSG00000090863.11	GLG1
3494.5	-0.167181	0.0447041	-3.73973	0.000184221	0.00276393	ENSG00000090889.12	KIF4A
678.881	-0.334928	0.0933147	-3.58923	0.000331651	0.00451336	ENSG00000090905.19	TNRC6A
135.792	-0.361904	0.186303	-1.94256	0.0520697	0.243619	ENSG00000090924.15	PLEKHG2
21.8885	0.0583656	0.460776	0.126668	0.899203	0.977131	ENSG00000090932.10	DLL3
242.251	0.078813	0.138769	0.567942	0.570075	0.864011	ENSG00000090971.5	NAT14
122.426	-0.0196975	0.194979	-0.101023	0.919532	0.980586	ENSG00000090975.12	PITPNM2
444.942	-0.212657	0.104237	-2.04012	0.0413382	0.207589	ENSG00000090989.18	EXOC1
1592.66	-0.276088	0.0680099	-4.05952	4.91727e-05	0.00089513	ENSG00000091009.8	RBM27
0.50597	-0.749931	3.06617	-0.244582	0.80678	NA	ENSG00000091010.6	POU4F3
2346.03	-0.232333	0.0641175	-3.62354	0.000290593	0.00405558	ENSG00000091039.17	OSBPL8
43.7299	0.0216322	0.319899	0.0676219	0.946087	0.985019	ENSG00000091073.19	DTX2
7.38869	0.477619	0.814581	0.586337	0.557649	NA	ENSG00000091106.19	NLRC4
1491.46	-0.0817452	0.0612785	-1.33399	0.182206	0.52482	ENSG00000091127.14	PUS7
2.2623	-1.16252	1.42576	-0.81537	0.41486	NA	ENSG00000091128.13	LAMB4
0.603126	-1.22714	3.08004	-0.398415	0.690324	NA	ENSG00000091129.20	NRCAM
18.7628	-0.348134	0.501319	-0.694436	0.487409	0.821227	ENSG00000091136.14	LAMB1
2.55749	-0.127622	1.5573	-0.081951	0.934686	NA	ENSG00000091137.12	SLC26A4
2647.07	-0.0577634	0.0533321	-1.08309	0.278769	0.653382	ENSG00000091140.14	DLD
331.361	-0.338719	0.12203	-2.7757	0.00550836	0.0465915	ENSG00000091157.13	WDR7
2139.73	0.172255	0.0568819	3.02829	0.00245944	0.0241757	ENSG00000091164.13	TXNL1
1.78762	-0.0603339	1.56429	-0.0385694	0.969234	NA	ENSG00000091262.15	ABCC6
2424.87	-0.0476753	0.0563044	-0.846742	0.397139	0.758941	ENSG00000091317.8	CMTM6
271.748	-0.123335	0.136241	-0.905273	0.365321	0.735631	ENSG00000091409.15	ITGA6
2.90496	-0.487484	1.24065	-0.392927	0.694373	NA	ENSG00000091428.18	RAPGEF4
1261.39	-0.293846	0.0642006	-4.57699	4.71716e-06	0.000111268	ENSG00000091436.17	MAP3K20
2125.13	0.14507	0.0552388	2.62623	0.00863359	0.0652737	ENSG00000091483.6	FH
72.0578	-0.0461905	0.266377	-0.173403	0.862335	0.968377	ENSG00000091490.11	SEL1L3
4.03345	-0.669214	1.07538	-0.622305	0.533742	NA	ENSG00000091513.16	TF
5125.81	0.102309	0.0395069	2.58966	0.00960712	0.0706661	ENSG00000091527.15	CDV3
1.30881	-0.550231	1.88243	-0.292298	0.770059	NA	ENSG00000091536.18	MYO15A
1083.86	0.0643072	0.0765672	0.839879	0.400976	0.761502	ENSG00000091542.9	ALKBH5
0.353545	0.18064	3.77969	0.0477923	0.961882	NA	ENSG00000091592.16	NLRP1
12.1985	-0.213728	0.62172	-0.343768	0.731021	0.926649	ENSG00000091622.16	PITPNM3
615.75	0.0749206	0.0909945	0.823353	0.410307	0.76738	ENSG00000091640.8	SPAG7
1318.84	0.36025	0.0671026	5.36864	7.93325e-08	2.87269e-06	ENSG00000091651.9	ORC6
0.631509	-1.2482	2.80664	-0.44473	0.656515	NA	ENSG00000091664.8	SLC17A6
675.69	0.0196329	0.0845668	0.232159	0.816415	0.954053	ENSG00000091732.16	ZC3HC1
10.6786	0.170029	0.65586	0.259246	0.795445	NA	ENSG00000091844.8	RGS17
1.02917	-0.836193	2.3557	-0.354965	0.722616	NA	ENSG00000091879.13	ANGPT2
378.219	0.028175	0.113338	0.248592	0.803676	0.949785	ENSG00000091947.10	TMEM101
9.7243	-0.928456	0.712372	-1.30333	0.192462	NA	ENSG00000091972.18	CD200
283.225	0.212531	0.132904	1.59913	0.109791	0.394382	ENSG00000091986.15	CCDC80
614.186	0.153963	0.0882885	1.74386	0.0811836	0.325951	ENSG00000092010.15	PSME1
331.328	0.129483	0.123204	1.05096	0.293277	0.667259	ENSG00000092020.10	PPP2R3C
396.382	0.0701682	0.120774	0.580989	0.561248	0.861181	ENSG00000092036.18	HAUS4
0.456232	-0.644393	3.42695	-0.188037	0.850848	NA	ENSG00000092068.20	SLC7A8
199.154	-0.100041	0.15261	-0.655532	0.512125	0.836464	ENSG00000092094.11	OSGEP
25.8365	-0.0481023	0.420087	-0.114506	0.908837	0.979116	ENSG00000092096.16	SLC22A17
191.994	-0.170401	0.166785	-1.02168	0.306933	0.6809	ENSG00000092098.17	RNF31
1047.7	-0.0682164	0.0801424	-0.85119	0.394664	0.757462	ENSG00000092108.20	SCFD1
934.397	-0.17675	0.0855227	-2.0667	0.0387626	0.198677	ENSG00000092140.16	G2E3
1872.37	-0.293268	0.0540786	-5.423	5.86055e-08	2.16308e-06	ENSG00000092148.13	HECTD1
11412	0.0371678	0.0383665	0.968756	0.332667	0.707032	ENSG00000092199.17	HNRNPC
3.26252	1.65385	1.22397	1.35122	0.176625	NA	ENSG00000092200.12	RPGRIP1
5490.45	-0.145236	0.0405489	-3.58175	0.000341306	0.00461434	ENSG00000092201.10	SUPT16H
891.064	0.0790133	0.076876	1.0278	0.304043	0.679948	ENSG00000092203.14	TOX4
248.399	0.0794964	0.140128	0.567312	0.570502	0.864057	ENSG00000092208.17	GEMIN2
2.84105	0.354541	1.24751	0.284199	0.776258	NA	ENSG00000092295.12	TGM1
166.607	-0.047172	0.166262	-0.283722	0.776624	0.940851	ENSG00000092330.17	TINF2
3.60756	0.209377	1.12607	0.185935	0.852496	NA	ENSG00000092421.16	SEMA6A
950.379	-0.201838	0.0785799	-2.56857	0.0102119	0.0739561	ENSG00000092439.15	TRPM7
376.46	-0.0654724	0.112402	-0.582485	0.56024	0.860642	ENSG00000092445.12	TYRO3
699.74	-0.00842327	0.0869352	-0.0968914	0.922813	0.981435	ENSG00000092470.12	WDR76
1.9836	1.68738	1.74084	0.96929	0.3324	NA	ENSG00000092529.24	CAPN3
861.927	-0.00465086	0.0838134	-0.0554907	0.955748	0.986433	ENSG00000092531.10	SNAP23
615.082	0.140682	0.0954757	1.47349	0.14062	0.451871	ENSG00000092621.12	PHGDH
8922.85	0.0591334	0.033956	1.74147	0.0816008	0.326745	ENSG00000092820.18	EZR
6719.71	0.185948	0.0458272	4.05759	4.95826e-05	0.000900145	ENSG00000092841.18	MYL6
1000.78	-0.33478	0.0858621	-3.89904	9.65748e-05	0.00158373	ENSG00000092847.12	AGO1
0.330693	0.18064	3.87678	0.0465953	0.962836	NA	ENSG00000092850.12	TEKT2
1948.54	0.0232665	0.075732	0.307221	0.758675	0.933817	ENSG00000092853.14	CLSPN
900.801	-0.250423	0.0750902	-3.33496	0.000853112	0.00986195	ENSG00000092871.16	RFFL
3.03881	0.499742	1.19362	0.418678	0.675451	NA	ENSG00000092929.11	UNC13D
181.419	0.185503	0.159812	1.16076	0.245738	0.612311	ENSG00000092931.11	MFSD11
2687.99	-0.152857	0.148836	-1.02701	0.304415	0.680032	ENSG00000092964.18	DPYSL2
180.792	-0.455753	0.160532	-2.83901	0.00452537	0.0399677	ENSG00000092969.12	TGFB2
420.591	-0.239835	0.112473	-2.13237	0.0329762	0.176444	ENSG00000092978.11	GPATCH2
1777.42	-0.0374391	0.0589931	-0.634636	0.525666	0.84255	ENSG00000093000.19	NUP50
911.9	0.11765	0.0788511	1.49205	0.135686	0.444043	ENSG00000093009.9	CDC45
852.681	0.0696982	0.0780447	0.893055	0.371827	0.740292	ENSG00000093010.13	COMT
1.604	-1.01497	1.85081	-0.548395	0.583421	NA	ENSG00000093072.17	ADA2
32.1717	-0.266489	0.535159	-0.497963	0.61851	0.884817	ENSG00000093100.13	AC016026.1
1360.45	0.100038	0.0706075	1.41681	0.156538	0.479711	ENSG00000093144.19	ECHDC1
528.039	0.0369373	0.0951704	0.388117	0.697929	0.912991	ENSG00000093167.18	LRRFIP2
702.515	-0.107781	0.085172	-1.26545	0.205709	0.56072	ENSG00000093183.14	SEC22C
103.487	-0.206405	0.212389	-0.971822	0.331139	0.705791	ENSG00000093217.10	XYLB
506.327	-0.0858378	0.100597	-0.853284	0.393502	0.756635	ENSG00000094631.19	HDAC6
2213.57	0.0502828	0.0555914	0.904507	0.365727	0.735847	ENSG00000094804.11	CDC6
118.299	-0.0306471	0.215756	-0.142046	0.887044	0.973944	ENSG00000094841.14	UPRT
1630.69	0.0140627	0.0575583	0.244321	0.806983	0.950304	ENSG00000094880.11	CDC23
415.766	-0.0236985	0.115282	-0.205571	0.837126	0.960429	ENSG00000094914.13	AAAS
2082.21	-0.310946	0.0655449	-4.74402	2.09522e-06	5.42973e-05	ENSG00000094916.16	CBX5
800.173	0.033316	0.0853981	0.390126	0.696443	0.912442	ENSG00000094975.14	SUCO
3145.36	-0.0356963	0.0494723	-0.721542	0.470576	0.810762	ENSG00000095002.14	MSH2
204.582	-0.369876	0.164686	-2.24594	0.0247076	0.14443	ENSG00000095015.6	MAP3K1
354.315	-0.00538763	0.115187	-0.0467731	0.962694	0.988739	ENSG00000095059.16	DHPS
38.4995	-0.202998	0.34415	-0.589853	0.555289	0.858812	ENSG00000095066.11	HOOK2
3594.13	-0.06247	0.0419369	-1.48962	0.136325	0.445228	ENSG00000095139.14	ARCN1
32.5549	-0.145087	0.373076	-0.388895	0.697354	0.912774	ENSG00000095203.14	EPB41L4B
694.951	0.0426118	0.0871545	0.488923	0.624897	0.887195	ENSG00000095209.12	TMEM38B
2085.62	-0.162583	0.0546344	-2.97583	0.00292197	0.0278538	ENSG00000095261.14	PSMD5
2233.43	-0.147582	0.0568312	-2.59686	0.00940813	0.0696097	ENSG00000095319.14	NUP188
846.245	-0.0403389	0.0798577	-0.505135	0.613464	0.88456	ENSG00000095321.17	CRAT
0.64846	0.199689	2.63523	0.075777	0.939597	NA	ENSG00000095370.20	SH2D3C
1078.3	0.160171	0.072666	2.20421	0.0275097	0.155189	ENSG00000095380.11	NANS
300.247	-0.208561	0.134358	-1.55228	0.120594	0.41546	ENSG00000095383.20	TBC1D2
106.669	0.298909	0.215431	1.38749	0.165292	0.494657	ENSG00000095397.14	WHRN
0.470096	-0.698551	3.38953	-0.206091	0.83672	NA	ENSG00000095464.9	PDE6C
1061.95	-0.0579354	0.0711424	-0.814357	0.41544	0.771438	ENSG00000095485.18	CWF19L1
7.69344	-0.385072	0.786179	-0.489802	0.624274	NA	ENSG00000095539.15	SEMA4G
1530.29	-0.298581	0.060003	-4.9761	6.48785e-07	1.88148e-05	ENSG00000095564.14	BTAF1
411.724	0.2603	0.109627	2.37441	0.017577	0.111769	ENSG00000095574.11	IKZF5
4.682	-0.526062	0.992962	-0.529791	0.596257	NA	ENSG00000095587.9	TLL2
2.51982	0.780772	1.32729	0.588245	0.556368	NA	ENSG00000095596.12	CYP26A1
17.1605	0.538403	0.515521	1.04439	0.296307	0.671162	ENSG00000095637.22	SORBS1
10.4976	2.89402	0.792205	3.65312	0.000259076	NA	ENSG00000095739.11	BAMBI
6.36682	1.29865	0.871599	1.48997	0.136233	NA	ENSG00000095752.7	IL11
2328.77	0.00250874	0.0510213	0.0491704	0.960784	0.988008	ENSG00000095787.22	WAC
304.343	0.594114	0.133093	4.46389	8.04841e-06	0.000179721	ENSG00000095794.19	CREM
294.49	-0.0459923	0.133743	-0.343885	0.730933	0.926649	ENSG00000095906.17	NUBP2
0.330693	0.18064	3.87678	0.0465953	0.962836	NA	ENSG00000095932.6	SMIM24
559.276	-0.73745	0.0973102	-7.57834	3.50007e-14	3.10556e-12	ENSG00000095951.17	HIVEP1
1735.98	-0.0604519	0.059166	-1.02173	0.306907	0.6809	ENSG00000096060.14	FKBP5
5015.58	-0.114177	0.0421417	-2.70937	0.0067412	0.0539929	ENSG00000096063.16	SRPK1
594.082	-0.0879506	0.0954991	-0.920957	0.357073	0.727835	ENSG00000096070.19	BRPF3
467.894	0.146302	0.102188	1.43169	0.152232	0.472569	ENSG00000096080.11	MRPS18A
371.191	0.100972	0.114682	0.880453	0.378614	0.745446	ENSG00000096092.6	TMEM14A
202.287	-0.115649	0.153303	-0.754385	0.450618	0.796078	ENSG00000096093.16	EFHC1
43969.9	0.151447	0.0276946	5.46847	4.53942e-08	1.71806e-06	ENSG00000096384.20	HSP90AB1
0.478713	0.977867	3.36803	0.290337	0.771558	NA	ENSG00000096395.11	MLN
2124.05	0.0233106	0.0546287	0.42671	0.669591	0.903806	ENSG00000096401.8	CDC5L
963.377	-0.137162	0.0850142	-1.6134	0.106657	0.386319	ENSG00000096433.11	ITPR3
229.461	0.85176	0.152313	5.59217	2.24247e-08	9.07692e-07	ENSG00000096654.15	ZNF184
432.426	-0.29657	0.107011	-2.7714	0.00558166	0.047152	ENSG00000096696.14	DSP
839.49	0.237577	0.0798993	2.97345	0.0029447	0.0280206	ENSG00000096717.12	SIRT1
4150.57	0.0281635	0.0549388	0.512634	0.608207	0.88255	ENSG00000096746.17	HNRNPH3
403.862	0.0243311	0.113376	0.214605	0.830075	0.957688	ENSG00000096872.16	IFT74
199.474	-0.396213	0.152091	-2.6051	0.00918468	0.068412	ENSG00000096968.13	JAK2
713.515	-0.310899	0.0893295	-3.48037	0.000500726	0.00634095	ENSG00000097007.18	ABL1
1585.61	0.0405392	0.0622681	0.651043	0.515019	0.836464	ENSG00000097021.19	ACOT7
1112.05	-0.12956	0.0707763	-1.83055	0.0671679	0.289151	ENSG00000097033.14	SH3GLB1
659.987	-0.126529	0.0894445	-1.41461	0.157183	0.480808	ENSG00000097046.13	CDC7
42.6879	-0.322989	0.333856	-0.967452	0.333318	0.707072	ENSG00000097096.9	SYDE2
9889.65	0.0161828	0.0332893	0.486127	0.626877	0.888209	ENSG00000099194.6	SCD
328.875	0.107981	0.127447	0.847265	0.396847	0.758807	ENSG00000099203.7	TMED1
792.387	-0.16027	0.0794088	-2.01829	0.0435612	0.215522	ENSG00000099204.20	ABLIM1
1984.6	-0.172841	0.0532466	-3.24604	0.00117023	0.012915	ENSG00000099219.14	ERMP1
1207.95	-0.0661913	0.0743448	-0.890328	0.37329	0.741002	ENSG00000099246.16	RAB18
63.5982	0.223675	0.269363	0.830383	0.406322	0.765023	ENSG00000099250.18	NRP1
3.70865	-1.62356	1.2119	-1.33968	0.180351	NA	ENSG00000099251.14	HSD17B7P2
245.653	0.0729367	0.14203	0.513532	0.607579	0.88204	ENSG00000099256.19	PRTFDC1
78.0445	-0.121392	0.24426	-0.496979	0.619204	0.885011	ENSG00000099282.10	TSPAN15
240.54	0.0484619	0.144473	0.335439	0.737294	0.928292	ENSG00000099284.14	H2AFY2
1593.27	-0.124198	0.0653362	-1.9009	0.0573147	0.259514	ENSG00000099290.17	WASHC2A
50.8516	-0.122504	0.306452	-0.399751	0.68934	0.910557	ENSG00000099308.10	MAST3
94.764	0.0202087	0.236224	0.085549	0.931825	0.982536	ENSG00000099326.8	MZF1
45.5704	0.459084	0.32531	1.41122	0.158179	0.481933	ENSG00000099330.9	OCEL1
984.884	-0.287367	0.0775405	-3.70602	0.000210538	0.00310317	ENSG00000099331.13	MYO9B
91.4333	-0.0740353	0.228606	-0.323856	0.746047	0.931171	ENSG00000099337.5	KCNK6
8.13296	0.918841	0.748489	1.22759	0.219599	NA	ENSG00000099338.23	CATSPERG
3561.02	0.141213	0.0465183	3.03565	0.00240017	0.0237851	ENSG00000099341.11	PSMD8
346.839	-0.0601244	0.123	-0.488815	0.624973	0.887195	ENSG00000099364.16	FBXL19
27.6132	-0.308688	0.419681	-0.735531	0.462016	0.804681	ENSG00000099365.11	STX1B
634.895	0.0370628	0.0875618	0.423276	0.672094	0.904796	ENSG00000099377.14	HSD3B7
310.445	-0.256968	0.132959	-1.93268	0.0532759	0.246645	ENSG00000099381.18	SETD1A
958.453	0.0917803	0.079096	1.16037	0.2459	0.612504	ENSG00000099385.11	BCL7C
20.3476	-0.0407852	0.474896	-0.0858824	0.93156	0.98253	ENSG00000099617.4	EFNA2
1448.76	0.0651858	0.0610758	1.06729	0.28584	0.65904	ENSG00000099622.14	CIRBP
495.334	0.0758494	0.106239	0.713953	0.475256	0.814464	ENSG00000099624.8	ATP5F1D
34.9623	0.792808	0.36641	2.16372	0.0304861	0.166512	ENSG00000099625.13	CBARP
0.521615	1.12171	3.26434	0.343626	0.731128	NA	ENSG00000099769.5	IGFALS
4987.97	-0.0495238	0.037888	-1.30711	0.191174	0.538326	ENSG00000099783.12	HNRNPM
216.688	0.134218	0.150936	0.88924	0.373874	0.741002	ENSG00000099785.10	2002-03-01
741.229	0.0504358	0.0843322	0.598061	0.5498	0.855795	ENSG00000099795.7	NDUFB7
882.477	0.0750252	0.0754657	0.994164	0.320143	0.694837	ENSG00000099797.15	TECR
560.288	0.14218	0.102047	1.39328	0.163534	0.491263	ENSG00000099800.8	TIMM13
661.493	0.129112	0.0958374	1.3472	0.177916	0.517749	ENSG00000099804.9	CDC34
29.3708	0.0351574	0.391449	0.0898134	0.928435	0.98238	ENSG00000099812.9	MISP
357.47	-0.235961	0.119457	-1.97527	0.048237	0.230924	ENSG00000099814.16	CEP170B
1539.72	0.0177493	0.0598329	0.296648	0.766735	0.936927	ENSG00000099817.12	POLR2E
324.675	0.0216916	0.123712	0.17534	0.860813	0.968377	ENSG00000099821.14	POLRMT
175.196	-0.116101	0.166487	-0.697358	0.485579	0.820206	ENSG00000099822.3	HCN2
5.85843	-0.145372	0.901263	-0.161298	0.871859	NA	ENSG00000099834.18	CDHR5
10.9466	1.05194	0.711101	1.47931	0.139058	NA	ENSG00000099840.13	IZUMO4
74.9209	0.0728846	0.247437	0.294558	0.768332	0.937532	ENSG00000099849.15	RASSF7
681.571	1.4644	0.0886521	16.5185	2.69894e-61	1.80802e-58	ENSG00000099860.9	GADD45B
459.619	0.0299297	0.105773	0.282962	0.777206	0.941011	ENSG00000099864.18	PALM
8.74679	-0.432699	0.726477	-0.595613	0.551434	NA	ENSG00000099866.15	MADCAM1
0.507372	-0.74991	3.06335	-0.244801	0.80661	NA	ENSG00000099869.7	IGF2-AS
1244.78	0.152211	0.0653167	2.33035	0.0197878	0.122033	ENSG00000099875.14	MKNK2
14.9788	0.561628	0.550468	1.02027	0.307599	0.681304	ENSG00000099889.14	ARVCF
301.098	0.0182932	0.131511	0.139101	0.889371	0.975185	ENSG00000099899.15	TRMT2A
4585.35	0.0783563	0.0412186	1.90099	0.0573027	0.259514	ENSG00000099901.17	RANBP1
173.991	0.0200794	0.161369	0.124431	0.900974	0.977249	ENSG00000099904.15	ZDHHC8
120.214	0.0164393	0.199321	0.0824766	0.934268	0.982598	ENSG00000099910.17	KLHL22
390.519	0.0245805	0.125688	0.195568	0.844948	0.96223	ENSG00000099917.17	MED15
2.11511	1.78631	1.59644	1.11893	0.263169	NA	ENSG00000099937.11	SERPIND1
871.287	-0.0597268	0.0770775	-0.774893	0.438403	0.788763	ENSG00000099940.12	SNAP29
1425.65	0.0161406	0.0710564	0.227152	0.820305	0.954733	ENSG00000099942.13	CRKL
391.536	-0.0045063	0.109303	-0.0412277	0.967114	0.990103	ENSG00000099949.20	LZTR1
48.3704	0.0862308	0.315447	0.27336	0.784576	0.943012	ENSG00000099953.10	MMP11
88.9346	-0.596821	0.232605	-2.56582	0.0102933	0.0743847	ENSG00000099954.18	CECR2
1430.07	0.0486666	0.0617413	0.788235	0.430559	0.785023	ENSG00000099956.19	SMARCB1
75.8934	0.265396	0.244024	1.08758	0.27678	0.650693	ENSG00000099957.16	P2RX6
0.777181	-2.99333	2.73103	-1.09604	0.273059	NA	ENSG00000099958.14	DERL3
1.12492	-1.15197	2.13953	-0.538423	0.590285	NA	ENSG00000099960.13	SLC7A4
1952.76	-0.0282272	0.0543505	-0.519354	0.603514	0.880262	ENSG00000099968.17	BCL2L13
85.5097	0.111738	0.233961	0.477593	0.63294	0.890382	ENSG00000099974.8	DDTL
800.536	0.0890566	0.078676	1.13194	0.257659	0.62841	ENSG00000099977.14	DDT
2.51787	0.0619283	3.79821	0.0163046	0.986991	NA	ENSG00000099984.11	GSTT2
0.493232	1.05221	3.09337	0.340148	0.733745	NA	ENSG00000099985.4	OSM
521.082	-0.24468	0.112748	-2.17015	0.0299957	0.164706	ENSG00000099991.18	CABIN1
160.073	-0.0585711	0.170125	-0.344283	0.730634	0.926632	ENSG00000099992.15	TBC1D10A
3.68352	0.739494	1.1339	0.652168	0.514293	NA	ENSG00000099994.11	SUSD2
1128.01	-0.0693977	0.0696486	-0.996397	0.319057	0.6935	ENSG00000099995.19	SF3A1
152.608	-0.0531022	0.175807	-0.302048	0.762615	0.935156	ENSG00000099999.14	RNF215
253.52	-0.00244366	0.141776	-0.017236	0.986248	0.995816	ENSG00000100003.18	SEC14L2
1004.9	-0.075517	0.074012	-1.02034	0.307569	0.681304	ENSG00000100014.20	SPECC1L
369.426	-0.0777094	0.118717	-0.654576	0.512741	0.836464	ENSG00000100023.19	PPIL2
2.41741	0.604458	1.42522	0.424115	0.671482	NA	ENSG00000100024.14	UPB1
101.293	0.186861	0.225494	0.828672	0.40729	0.765942	ENSG00000100027.15	YPEL1
1271.95	0.0861588	0.0684698	1.25835	0.208266	0.564278	ENSG00000100028.12	SNRPD3
1758.99	0.140458	0.0560807	2.50457	0.0122601	0.0848014	ENSG00000100029.18	PES1
3182.06	-0.172027	0.0449327	-3.82856	0.000128897	0.00204133	ENSG00000100030.14	MAPK1
99.727	0.169673	0.262627	0.646059	0.518241	0.837401	ENSG00000100031.19	GGT1
18.1986	0.787058	0.502798	1.56536	0.1175	0.410256	ENSG00000100033.16	PRODH
1140.02	-0.0503903	0.0723677	-0.696308	0.486236	0.820575	ENSG00000100034.14	PPM1F
51.2224	0.500234	0.304877	1.64077	0.100844	0.374166	ENSG00000100036.13	SLC35E4
248.377	-0.105766	0.146826	-0.720348	0.471311	0.810919	ENSG00000100038.19	TOP3B
1.98388	-0.824222	1.51763	-0.543098	0.587062	NA	ENSG00000100055.21	CYTH4
233.588	0.162663	0.144184	1.12817	0.25925	0.630157	ENSG00000100056.12	ESS2
88.0815	0.129723	0.228181	0.568508	0.56969	0.863722	ENSG00000100058.12	CRYBB2P1
0.493136	0.978396	3.33221	0.293618	0.76905	NA	ENSG00000100060.17	MFNG
37.4814	-0.406801	0.373963	-1.08781	0.27668	0.650664	ENSG00000100065.15	CARD10
21.1648	-0.0422053	0.482296	-0.0875092	0.930267	0.98253	ENSG00000100068.12	LRP5L
782.509	0.130975	0.0835331	1.56794	0.116894	0.408596	ENSG00000100075.10	SLC25A1
88.4871	-0.195529	0.234787	-0.832793	0.404962	0.763925	ENSG00000100077.15	GRK3
0.500164	1.05227	3.07897	0.34176	0.732532	NA	ENSG00000100079.7	LGALS2
321.13	0.0207156	0.131279	0.157799	0.874616	0.970477	ENSG00000100083.19	GGA1
624.21	-0.278509	0.091869	-3.03159	0.0024327	0.0239656	ENSG00000100084.14	HIRA
39.431	-0.391184	0.381366	-1.02574	0.305012	0.680032	ENSG00000100092.22	SH3BP1
4734.18	0.144295	0.0445666	3.23774	0.00120482	0.0132379	ENSG00000100097.12	LGALS1
261.772	-0.208944	0.134109	-1.55802	0.119229	0.412451	ENSG00000100099.20	HPS4
3.94993	1.08666	1.10255	0.985595	0.324332	NA	ENSG00000100100.12	PIK3IP1
216.028	-0.0896559	0.149219	-0.600836	0.54795	0.855045	ENSG00000100104.13	SRRD
277.199	-0.164362	0.131729	-1.24773	0.21213	0.568878	ENSG00000100105.18	PATZ1
438.544	-0.0201134	0.104433	-0.192596	0.847275	0.9632	ENSG00000100106.21	TRIOBP
342.181	0.0651241	0.123909	0.525581	0.59918	0.878354	ENSG00000100109.17	TFIP11
250.076	0.0790863	0.15246	0.518734	0.603946	0.880486	ENSG00000100116.16	GCAT
289.111	-0.0359479	0.135526	-0.265246	0.79082	0.945598	ENSG00000100124.15	ANKRD54
4070.41	0.0799715	0.0473023	1.69065	0.0909044	0.349232	ENSG00000100129.18	EIF3L
1814.39	0.120498	0.0617664	1.95086	0.0510735	0.241114	ENSG00000100138.15	SNU13
296.859	-0.173851	0.131318	-1.32389	0.185539	0.53052	ENSG00000100139.13	MICALL1
905.508	0.117581	0.0754467	1.55847	0.119122	0.412296	ENSG00000100142.15	POLR2F
0.315143	-1.68836	3.90801	-0.432025	0.665723	NA	ENSG00000100146.17	SOX10
70.3168	0.107982	0.257289	0.419689	0.674713	0.906155	ENSG00000100147.13	CCDC134
70.8383	-0.250099	0.257268	-0.972135	0.330983	0.705791	ENSG00000100150.18	DEPDC5
98.8785	0.159769	0.221944	0.719861	0.471611	0.811089	ENSG00000100151.16	PICK1
180.192	-0.36496	0.17482	-2.08763	0.0368313	0.191488	ENSG00000100154.14	TTC28
1.16445	0.576244	1.96254	0.293622	0.769047	NA	ENSG00000100156.10	SLC16A8
277.833	0.115695	0.129885	0.89075	0.373063	0.741002	ENSG00000100162.15	CENPM
100.791	-0.134844	0.219127	-0.61537	0.53831	0.849695	ENSG00000100167.20	2003-09-01
3.56239	0.602005	1.13853	0.528757	0.596974	NA	ENSG00000100181.22	TPTEP1
359.262	0.043166	0.126337	0.341673	0.732597	0.927375	ENSG00000100196.11	KDELR3
1.82884	1.62456	1.73353	0.937137	0.348688	NA	ENSG00000100197.22	CYP2D6
5010.7	-0.162074	0.0587666	-2.75793	0.00581681	0.0484662	ENSG00000100201.21	DDX17
90.9644	0.144636	0.225122	0.64248	0.520562	0.838899	ENSG00000100206.10	DMC1
637.94	-0.312048	0.107114	-2.91324	0.00357699	0.0330286	ENSG00000100207.18	TCF20
159.776	0.107808	0.180639	0.596815	0.550631	0.85635	ENSG00000100209.10	HSCB
414.321	0.192357	0.109843	1.75119	0.0799132	0.322008	ENSG00000100211.10	CBY1
1644.47	0.0195528	0.0584438	0.334557	0.737959	0.928292	ENSG00000100216.6	TOMM22
2.5944	-0.99702	1.38829	-0.718163	0.472657	NA	ENSG00000100218.11	RSPH14
1047.75	0.581024	0.0727298	7.98881	1.36249e-15	1.33246e-13	ENSG00000100219.16	XBP1
1613.27	0.0499669	0.0614921	0.812574	0.416462	0.771965	ENSG00000100220.12	RTCB
764.373	0.499176	0.0843219	5.91989	3.22163e-09	1.50395e-07	ENSG00000100221.10	JOSD1
1118.42	0.0295227	0.0701222	0.421017	0.673742	0.905412	ENSG00000100225.18	FBXO7
548.633	-0.0255028	0.0987938	-0.258141	0.796298	0.947916	ENSG00000100226.16	GTPBP1
849.277	0.0579808	0.0844949	0.686204	0.492584	0.824899	ENSG00000100227.18	POLDIP3
110.04	-0.0986583	0.209264	-0.471454	0.637316	0.891684	ENSG00000100228.12	RAB36
598.267	0.0172543	0.0912905	0.189004	0.850089	0.964097	ENSG00000100239.16	PPP6R2
395.627	-0.0963121	0.117258	-0.821371	0.411435	0.767638	ENSG00000100241.21	SBF1
475.279	0.065083	0.102411	0.635506	0.525099	0.842147	ENSG00000100242.15	SUN2
764.851	0.0708985	0.0870166	0.81477	0.415204	0.771281	ENSG00000100243.21	CYB5R3
78.5866	-0.184027	0.249376	-0.737951	0.460544	0.804003	ENSG00000100246.13	DNAL4
314.34	0.221088	0.128453	1.72116	0.0852217	0.335824	ENSG00000100258.18	LMF2
107.185	0.196325	0.20567	0.954566	0.339797	0.713463	ENSG00000100263.14	RHBDD3
839.11	-0.0265333	0.0789582	-0.336042	0.736839	0.928292	ENSG00000100266.19	PACSIN2
70.5238	0.113158	0.268102	0.422071	0.672973	0.905089	ENSG00000100271.17	TTLL1
8.64511	0.820635	0.727308	1.12832	0.259186	NA	ENSG00000100276.10	RASL10A
918.934	-0.0513366	0.0742538	-0.691367	0.489335	0.822599	ENSG00000100280.16	AP1B1
588.911	-0.245817	0.0900471	-2.72988	0.00633582	0.0516033	ENSG00000100281.14	HMGXB4
157.217	0.0684242	0.178273	0.383817	0.701114	0.913991	ENSG00000100284.21	TOM1
1.16314	0.649037	1.96444	0.330393	0.741103	NA	ENSG00000100285.9	NEFH
65.3976	0.0604347	0.275728	0.219182	0.826508	0.956907	ENSG00000100288.19	CHKB
11.7903	1.65631	0.665927	2.48722	0.0128744	0.0879161	ENSG00000100290.3	BIK
250.417	1.94788	0.145658	13.373	8.70051e-41	3.23804e-38	ENSG00000100292.17	HMOX1
158.098	-0.0551452	0.172248	-0.320151	0.748854	0.931305	ENSG00000100294.12	MCAT
873.979	0.115607	0.0849344	1.36113	0.173474	0.509654	ENSG00000100296.13	THOC5
1404.17	-0.000794276	0.06408	-0.0123951	0.99011	0.997106	ENSG00000100297.16	MCM5
3.3534	0.177036	1.17682	0.150436	0.880421	NA	ENSG00000100298.15	APOBEC3H
58.9733	-0.0596092	0.276979	-0.215212	0.829602	0.957509	ENSG00000100299.18	ARSA
702.486	0.151132	0.0902997	1.67367	0.0941953	0.358225	ENSG00000100300.18	TSPO
0.722736	1.7119	2.68878	0.636682	0.524332	NA	ENSG00000100302.7	RASD2
1437.97	-0.0385577	0.0625051	-0.616873	0.537319	0.849622	ENSG00000100304.13	TTLL12
237.52	-0.0662548	0.141518	-0.468174	0.63966	0.892447	ENSG00000100307.13	CBX7
71.4425	-0.76737	0.266235	-2.88231	0.00394774	0.0357164	ENSG00000100311.16	PDGFB
0.330693	0.18064	3.87678	0.0465953	0.962836	NA	ENSG00000100312.10	ACR
1.49271	-0.12566	1.76639	-0.0711396	0.943287	NA	ENSG00000100314.4	CABP7
17580.1	0.0976579	0.0311718	3.1329	0.00173091	0.0180332	ENSG00000100316.16	RPL3
102.651	-0.0323886	0.209796	-0.154382	0.877309	0.971125	ENSG00000100319.12	ZMAT5
1339.94	-0.102196	0.066183	-1.54414	0.122553	0.41899	ENSG00000100320.23	RBFOX2
124.243	-0.0726701	0.199316	-0.364597	0.715412	0.92014	ENSG00000100321.15	SYNGR1
216.44	0.168697	0.15752	1.07095	0.284192	0.657929	ENSG00000100324.14	TAB1
468.065	0.0151218	0.104155	0.145185	0.884565	0.973408	ENSG00000100325.15	ASCC2
338.717	-0.258229	0.129524	-1.99368	0.0461867	0.224632	ENSG00000100330.15	MTMR3
544.302	-0.164293	0.0997456	-1.64712	0.0995341	0.371061	ENSG00000100335.15	MIEF1
4.19764	0.225023	1.10776	0.203134	0.839031	NA	ENSG00000100342.20	APOL1
34.2505	-0.196436	0.364092	-0.539523	0.589526	0.874382	ENSG00000100344.10	PNPLA3
3514.95	-0.120944	0.0540452	-2.23784	0.0252317	0.146217	ENSG00000100345.21	MYH9
0.322076	-1.71577	3.87497	-0.442784	0.657922	NA	ENSG00000100346.17	CACNA1I
974.107	0.0454641	0.0811018	0.56058	0.575084	0.866312	ENSG00000100347.15	SAMM50
755.501	0.106172	0.0806741	1.31606	0.188154	0.533861	ENSG00000100348.10	TXN2
464.306	-0.116635	0.111313	-1.04782	0.294722	0.669309	ENSG00000100350.14	FOXRED2
2739.68	0.109117	0.0502786	2.17024	0.0299886	0.164706	ENSG00000100353.18	EIF3D
522.339	-0.229079	0.105915	-2.16286	0.0305522	0.166669	ENSG00000100354.21	TNRC6B
261.884	-0.00498991	0.148138	-0.0336841	0.973129	0.991482	ENSG00000100359.21	SGSM3
213.717	-0.0460348	0.148058	-0.310924	0.755858	0.933449	ENSG00000100360.15	IFT27
485.386	-0.168651	0.10136	-1.66388	0.0961361	0.362969	ENSG00000100364.18	KIAA0930
1047.08	0.0659956	0.0757087	0.871705	0.383369	0.748581	ENSG00000100372.15	SLC25A17
174.323	0.270389	0.166735	1.62168	0.104873	0.383022	ENSG00000100376.12	FAM118A
102.072	-0.0164424	0.212132	-0.0775103	0.938218	0.983664	ENSG00000100379.17	KCTD17
5400.61	0.0238117	0.0515342	0.462056	0.644041	0.894135	ENSG00000100380.14	ST13
765.687	0.183595	0.083774	2.19155	0.0284123	0.158696	ENSG00000100387.8	RBX1
559.226	-0.329288	0.103284	-3.18817	0.00143175	0.0154325	ENSG00000100393.13	EP300
422.423	-0.0406521	0.109558	-0.371054	0.710597	0.918196	ENSG00000100395.15	L3MBTL2
0.601441	-2.63036	3.00179	-0.876264	0.380887	NA	ENSG00000100399.16	CHADL
2103.9	-0.0407928	0.0561728	-0.726202	0.467715	0.809096	ENSG00000100401.19	RANGAP1
733.99	-0.17474	0.0851058	-2.05321	0.0400518	0.203109	ENSG00000100403.12	ZC3H7B
813.76	0.215087	0.0832445	2.58379	0.00977204	0.0715833	ENSG00000100410.8	PHF5A
1341.32	0.0422887	0.0660129	0.640614	0.521774	0.840231	ENSG00000100412.16	ACO2
429.481	-0.0601711	0.112856	-0.533168	0.593917	0.876607	ENSG00000100413.17	POLR3H
523.484	-0.0635306	0.0975116	-0.651518	0.514712	0.836464	ENSG00000100416.14	TRMU
309.456	0.240916	0.125718	1.91632	0.055324	0.253499	ENSG00000100417.12	PMM1
1148.39	-0.0263539	0.0663566	-0.397156	0.691253	0.911576	ENSG00000100418.8	DESI1
563.88	-0.112839	0.0936118	-1.20539	0.228052	0.589655	ENSG00000100422.14	CERK
275.378	-0.0654327	0.130184	-0.502617	0.615234	0.88456	ENSG00000100425.18	BRD1
357.069	-0.176893	0.12921	-1.36904	0.170987	0.504822	ENSG00000100426.7	ZBED4
64.3615	0.0549522	0.267095	0.20574	0.836994	0.960429	ENSG00000100429.18	HDAC10
179.528	0.317175	0.16054	1.97568	0.0481911	0.230924	ENSG00000100439.10	ABHD4
544.515	0.0904455	0.0961152	0.941011	0.346699	0.719943	ENSG00000100441.10	KHNYN
1700.95	0.101235	0.0698579	1.44916	0.147293	0.463316	ENSG00000100442.11	FKBP3
182.579	0.088857	0.164827	0.539093	0.589823	0.874382	ENSG00000100445.17	SDR39U1
556.773	0.10807	0.099862	1.08219	0.279168	0.653382	ENSG00000100461.18	RBM23
1563.88	0.0333042	0.059141	0.563131	0.573345	0.865249	ENSG00000100462.16	PRMT5
278.694	0.104479	0.133752	0.781143	0.434718	0.786535	ENSG00000100473.17	COCH
106.247	-0.0848726	0.213455	-0.397614	0.690914	0.911558	ENSG00000100478.14	AP4S1
361.78	0.0362147	0.115574	0.313347	0.754017	0.932578	ENSG00000100479.13	POLE2
130.797	0.209021	0.191083	1.09387	0.274011	0.647783	ENSG00000100483.14	VCPKMT
441.819	-0.35649	0.113508	-3.14065	0.00168571	0.0176567	ENSG00000100485.12	SOS2
68.9867	-0.106513	0.269587	-0.395097	0.692771	0.911774	ENSG00000100490.9	CDKL1
1084	-0.285604	0.0739835	-3.86037	0.000113214	0.00181223	ENSG00000100503.23	NIN
840.246	0.0301032	0.0787133	0.382442	0.702134	0.914473	ENSG00000100504.17	PYGL
2408.43	0.0839819	0.0543767	1.54444	0.122481	0.41899	ENSG00000100519.12	PSMC6
1551.79	0.00295241	0.067502	0.0437381	0.965113	0.989485	ENSG00000100522.10	GNPNAT1
274.029	-0.137194	0.130694	-1.04973	0.29384	0.668059	ENSG00000100523.14	DDHD1
1506.01	0.116759	0.0631161	1.84991	0.0643264	0.280366	ENSG00000100526.20	CDKN3
1512.03	0.0243626	0.0631995	0.385487	0.699877	0.913942	ENSG00000100528.12	CNIH1
125.391	0.0980379	0.193667	0.506219	0.612703	0.88456	ENSG00000100532.12	CGRRF1
1001.9	0.0654329	0.0741676	0.88223	0.377653	0.744963	ENSG00000100554.12	ATP6V1D
188.279	0.135396	0.159662	0.848017	0.396429	0.758223	ENSG00000100564.9	PIGH
2217.05	0.1632	0.0566958	2.87852	0.00399551	0.0361214	ENSG00000100567.13	PSMA3
1294.46	-0.031446	0.0655264	-0.479899	0.631299	0.889957	ENSG00000100568.11	VTI1B
402.089	0.0778901	0.108603	0.717204	0.473248	0.81227	ENSG00000100575.14	TIMM9
162.84	0.0790075	0.173687	0.454884	0.649193	0.895581	ENSG00000100577.19	GSTZ1
741.047	-0.133742	0.0847939	-1.57726	0.114735	0.403895	ENSG00000100578.15	KIAA0586
842.38	-0.164123	0.0769409	-2.13311	0.0329158	0.176323	ENSG00000100580.8	TMED8
5.34055	0.728464	0.918831	0.792816	0.427885	NA	ENSG00000100583.4	SAMD15
2753.58	0.172604	0.0500316	3.4499	0.000560804	0.00697646	ENSG00000100591.8	AHSA1
30.9385	-0.334077	0.391296	-0.85377	0.393232	0.756538	ENSG00000100592.15	DAAM1
6.7879	0.916908	0.827659	1.10783	0.267934	NA	ENSG00000100593.18	ISM2
470.723	-0.166358	0.106624	-1.56023	0.118706	0.41222	ENSG00000100596.6	SPTLC2
53.3589	-0.264586	0.301364	-0.87796	0.379966	0.74642	ENSG00000100599.16	RIN3
388.49	0.218581	0.110924	1.97055	0.0487758	0.232803	ENSG00000100600.15	LGMN
233.222	0.0818968	0.150073	0.545714	0.585262	0.871399	ENSG00000100601.10	ALKBH1
1643.96	0.0466827	0.0592596	0.787765	0.430834	0.785023	ENSG00000100603.13	SNW1
[truncated: 22,185 more rows]

## Sheet: Rosa26 napa_vs_DMSO
baseMean	log2FoldChange	lfcSE	stat	pvalue	padj	EnsemblID	GeneName
1787.03	0.154749	0.071368	2.16832	0.0301342	0.441074	ENSG00000000419.12	DPM1
134.86	-0.0676709	0.20396	-0.331785	0.740052	0.998927	ENSG00000000457.14	SCYL3
532.699	-0.0293865	0.106893	-0.274914	0.783382	0.998927	ENSG00000000460.17	C1orf112
3.19306	-0.0268301	1.30499	-0.0205596	0.983597	NA	ENSG00000000971.15	CFH
1649.3	0.0179868	0.0641351	0.280452	0.779131	0.998927	ENSG00000001036.13	FUCA2
378.902	0.263954	0.128965	2.04671	0.0406866	0.531091	ENSG00000001084.12	GCLC
1153.58	0.135304	0.0786022	1.72138	0.0851812	0.747176	ENSG00000001167.14	NFYA
42.0618	-0.116304	0.366796	-0.317081	0.751182	0.998927	ENSG00000001460.18	STPG1
110.174	0.130113	0.227363	0.572268	0.56714	0.998927	ENSG00000001461.17	NIPAL3
1943.19	0.0140927	0.0595005	0.23685	0.812773	0.998927	ENSG00000001497.16	LAS1L
17.0855	0.422862	0.625888	0.675619	0.499283	NA	ENSG00000001617.12	SEMA3F
1416.77	-0.127967	0.0674612	-1.8969	0.0578405	0.634074	ENSG00000001629.10	ANKIB1
1259.66	0.138478	0.0760167	1.82168	0.0685042	0.680091	ENSG00000001630.17	CYP51A1
540.452	0.0105063	0.125623	0.0836331	0.933348	0.998927	ENSG00000001631.15	KRIT1
97.9904	-0.524385	0.240584	-2.17963	0.0292846	0.435539	ENSG00000002016.17	RAD52
37.3034	-0.228207	0.407236	-0.56038	0.57522	0.998927	ENSG00000002079.14	MYH16
252.038	0.0977106	0.151781	0.643762	0.51973	0.998927	ENSG00000002330.13	BAD
1063.14	0.0739146	0.0772365	0.95699	0.338572	0.998927	ENSG00000002549.12	LAP3
425.454	0.162967	0.123124	1.3236	0.185636	0.966049	ENSG00000002586.20	CD99
425.454	0.162967	0.123124	1.3236	0.185636	0.966049	ENSG00000002586.20_PAR_Y	CD99
2.2922	1.81036	1.7609	1.02809	0.303908	NA	ENSG00000002745.13	WNT16
22.6492	0.587203	0.508659	1.15441	0.248331	NA	ENSG00000002746.15	HECW1
392.037	0.128644	0.130873	0.982967	0.325624	0.998927	ENSG00000002822.15	MAD1L1
3776.43	0.018614	0.0466762	0.39879	0.690048	0.998927	ENSG00000002834.18	LASP1
389.974	0.0674912	0.12292	0.549065	0.582961	0.998927	ENSG00000002919.14	SNX11
3612.47	0.0237028	0.0503296	0.470952	0.637675	0.998927	ENSG00000003056.8	M6PR
65.9897	-0.265979	0.300184	-0.886053	0.375589	0.998927	ENSG00000003096.14	KLHL13
5.83241	0.337089	1.0264	0.328418	0.742595	NA	ENSG00000003147.19	ICA1
226.132	-0.018546	0.162956	-0.11381	0.909388	0.998927	ENSG00000003249.13	DBNDD1
1181.92	-0.0306266	0.0780398	-0.392448	0.694727	0.998927	ENSG00000003393.15	ALS2
235.246	0.204782	0.170635	1.20012	0.230093	0.998927	ENSG00000003400.14	CASP10
1317.02	-0.112572	0.070025	-1.6076	0.107923	0.817119	ENSG00000003402.20	CFLAR
1585.05	0.0126964	0.0692083	0.183452	0.854443	0.998927	ENSG00000003436.16	TFPI
344.046	0.0331325	0.130999	0.252922	0.800328	0.998927	ENSG00000003509.16	NDUFAF7
914.051	0.03164	0.0830562	0.380947	0.703243	0.998927	ENSG00000003756.16	RBM5
35.488	0.233207	0.414042	0.563246	0.573268	0.998927	ENSG00000003987.14	MTMR7
15.5874	-0.614574	0.604539	-1.0166	0.309344	NA	ENSG00000003989.17	SLC7A2
1407.84	0.0174116	0.0687064	0.25342	0.799943	0.998927	ENSG00000004059.11	ARF5
161.221	-0.30058	0.187568	-1.60251	0.109042	0.820005	ENSG00000004139.14	SARM1
2554.34	0.0374934	0.0566259	0.662123	0.507892	0.998927	ENSG00000004142.12	POLDIP2
743.392	-0.0721045	0.0991114	-0.727509	0.466914	0.998927	ENSG00000004399.12	PLXND1
6000.76	0.0676083	0.0423638	1.5959	0.110511	0.827065	ENSG00000004455.16	AK2
5638.74	0.042148	0.0408563	1.03162	0.302252	0.998927	ENSG00000004478.8	FKBP4
1868.93	-0.0485931	0.0613832	-0.791635	0.428574	0.998927	ENSG00000004487.16	KDM1A
615.963	0.187331	0.103839	1.80405	0.0712229	0.695839	ENSG00000004534.15	RBM6
96.8728	0.137305	0.251269	0.546449	0.584758	0.998927	ENSG00000004660.14	CAMKK1
2492.28	-0.0159466	0.061349	-0.259932	0.794916	0.998927	ENSG00000004700.16	RECQL
242.885	0.00335204	0.161243	0.0207888	0.983414	0.998927	ENSG00000004766.17	VPS50
0.752428	-1.86156	2.7737	-0.671147	0.502127	NA	ENSG00000004776.13	HSPB6
37.5078	-0.368552	0.451985	-0.815409	0.414838	0.998927	ENSG00000004777.18	ARHGAP33
1218.39	0.0947468	0.0734685	1.28962	0.197181	0.98464	ENSG00000004779.10	NDUFAB1
1.09337	-3.81803	2.58687	-1.47592	0.139964	NA	ENSG00000004799.8	PDK4
1.57194	-0.392633	1.80164	-0.21793	0.827483	NA	ENSG00000004809.14	SLC22A16
2.85115	0.470549	1.42708	0.329728	0.741606	NA	ENSG00000004838.14	ZMYND10
2.13441	-0.65231	1.63777	-0.398293	0.690414	NA	ENSG00000004848.8	ARX
1242.15	0.0110217	0.0781286	0.141071	0.887814	0.998927	ENSG00000004864.13	SLC25A13
348.254	0.0571691	0.136692	0.418232	0.675778	0.998927	ENSG00000004866.20	ST7
2861.14	-0.059747	0.0551386	-1.08358	0.278551	0.998927	ENSG00000004897.12	CDC27
0.566687	-1.26721	3.4071	-0.371934	0.709942	NA	ENSG00000004939.15	SLC4A1
0.812803	1.20048	2.85955	0.419815	0.674621	NA	ENSG00000004948.14	CALCR
1248.72	0.0245199	0.0808651	0.30322	0.761722	0.998927	ENSG00000004961.15	HCCS
374.182	-0.00150883	0.1289	-0.0117054	0.990661	0.998927	ENSG00000004975.12	DVL2
0.430133	2.07995	3.82691	0.543506	0.586781	NA	ENSG00000005001.10	PRSS22
1249.61	0.139715	0.0891951	1.5664	0.117254	0.856166	ENSG00000005007.12	UPF1
866.807	0.0559634	0.0852499	0.656463	0.511526	0.998927	ENSG00000005020.13	SKAP2
9884.72	0.0670599	0.0377347	1.77714	0.0755451	0.71174	ENSG00000005022.6	SLC25A5
479.129	-0.106468	0.115447	-0.922226	0.356411	0.998927	ENSG00000005059.16	MCUB
30.5183	-0.380965	0.439505	-0.866804	0.386049	0.998927	ENSG00000005073.5	HOXA11
651.341	0.0307197	0.106475	0.288516	0.772952	0.998927	ENSG00000005075.15	POLR2J
1161.96	0.0545701	0.0736191	0.741249	0.458542	0.998927	ENSG00000005100.13	DHX33
0.847356	1.24078	2.82926	0.438551	0.660987	NA	ENSG00000005102.13	MEOX1
1017.33	-0.0513679	0.0804065	-0.638853	0.522918	0.998927	ENSG00000005156.11	LIG3
722.912	0.0350391	0.0908743	0.385578	0.69981	0.998927	ENSG00000005175.10	RPAP3
2.50904	0.676398	1.61424	0.419021	0.675201	NA	ENSG00000005187.12	ACSM3
282.485	-0.0495347	0.146519	-0.338076	0.735306	0.998927	ENSG00000005189.19	REXO5
1824.43	-0.00440055	0.0710918	-0.0618995	0.950643	0.998927	ENSG00000005194.15	CIAPIN1
193.594	-0.0605448	0.179942	-0.336468	0.736518	0.998927	ENSG00000005206.17	SPPL2B
72.8092	0.0982794	0.301672	0.325783	0.744589	0.998927	ENSG00000005238.19	FAM214B
58.3362	0.173819	0.321179	0.541191	0.588376	0.998927	ENSG00000005243.10	COPZ2
888.25	0.0178958	0.0836134	0.214031	0.830523	0.998927	ENSG00000005249.13	PRKAR2B
519.439	-0.073727	0.107403	-0.686452	0.492428	0.998927	ENSG00000005302.18	MSL3
514.846	-0.0672619	0.106848	-0.629511	0.529015	0.998927	ENSG00000005339.14	CREBBP
0.404777	2.00898	3.90871	0.513975	0.60727	NA	ENSG00000005421.8	PON1
729.937	-0.0445359	0.096067	-0.463592	0.64294	0.998927	ENSG00000005436.13	GCFC2
307.203	0.0668184	0.137645	0.48544	0.627365	0.998927	ENSG00000005448.16	WDR54
112.429	0.321794	0.224444	1.43374	0.151647	0.925442	ENSG00000005469.11	CROT
1.03854	3.36163	2.56613	1.31	0.190196	NA	ENSG00000005471.17	ABCB4
1063.25	-0.209488	0.079831	-2.62414	0.00868688	0.202839	ENSG00000005483.20	KMT2E
538.644	0.0445642	0.114195	0.390247	0.696354	0.998927	ENSG00000005486.17	RHBDD2
69.4579	0.17778	0.295323	0.601986	0.547183	0.998927	ENSG00000005513.10	SOX8
1319.96	-0.141885	0.0723693	-1.96056	0.04993	0.587634	ENSG00000005700.15	IBTK
508.021	0.0490682	0.111434	0.440334	0.659695	0.998927	ENSG00000005801.18	ZNF195
708.435	-0.139766	0.0939167	-1.48819	0.136702	0.900524	ENSG00000005810.18	MYCBP2
495.471	0.0407792	0.114398	0.356468	0.72149	0.998927	ENSG00000005812.11	FBXL3
0.414731	-0.291598	3.91503	-0.0744818	0.940627	NA	ENSG00000005844.17	ITGAL
52.3601	0.148142	0.32863	0.450785	0.652144	0.998927	ENSG00000005882.11	PDK2
1097.95	-0.0688009	0.0852708	-0.806852	0.419752	0.998927	ENSG00000005884.18	ITGA3
1125.69	0.0604198	0.0773199	0.781427	0.434551	0.998927	ENSG00000005889.15	ZFX
1618.18	0.0506863	0.066477	0.762463	0.445784	0.998927	ENSG00000005893.15	LAMP2
764.521	-0.0175873	0.0953186	-0.184511	0.853613	0.998927	ENSG00000006007.12	GDE1
117.403	-0.0769698	0.219652	-0.350417	0.726026	0.998927	ENSG00000006015.17	REX1BD
110.192	0.240124	0.249932	0.960756	0.336675	0.998927	ENSG00000006016.11	CRLF1
15.2672	0.24036	0.625986	0.383971	0.701	NA	ENSG00000006025.12	AC003665.1
0.834911	3.04521	2.76673	1.10065	0.271048	NA	ENSG00000006047.13	YBX2
544.462	-0.0779357	0.108517	-0.718191	0.47264	0.998927	ENSG00000006062.16	MAP3K14
1.00677	-0.889194	2.51161	-0.354034	0.723314	NA	ENSG00000006071.13	ABCC8
112.258	0.123589	0.230855	0.535353	0.592406	0.998927	ENSG00000006118.14	TMEM132A
10332.2	-0.0041044	0.0335994	-0.122157	0.902775	0.998927	ENSG00000006125.18	AP2B1
565.478	0.261247	0.107138	2.43841	0.014752	0.29542	ENSG00000006194.10	ZNF263
0.404777	2.00898	3.90871	0.513975	0.60727	NA	ENSG00000006210.7	CX3CL1
506.071	-0.00340471	0.116642	-0.0291895	0.976713	0.998927	ENSG00000006282.21	SPATA20
0.586304	0.57604	3.18616	0.180795	0.856529	NA	ENSG00000006283.18	CACNA1G
872.962	0.141435	0.08726	1.62085	0.10505	0.806349	ENSG00000006327.13	TNFRSF12A
11.9084	-0.724827	0.707367	-1.02468	0.305512	NA	ENSG00000006377.11	DLX6
52.3122	-0.454161	0.329201	-1.37959	0.167714	0.948641	ENSG00000006432.15	MAP3K9
1244.31	-0.0680064	0.0735163	-0.925052	0.354939	0.998927	ENSG00000006451.8	RALA
714.884	0.00554707	0.0941956	0.0588888	0.953041	0.998927	ENSG00000006453.14	BAIAP2L1
253.363	-0.168429	0.166328	-1.01263	0.311236	0.998927	ENSG00000006459.11	KDM7A
180.389	-0.263132	0.191702	-1.37261	0.169874	0.952756	ENSG00000006468.14	ETV1
1281.1	-0.0108062	0.0759317	-0.142315	0.886831	0.998927	ENSG00000006530.17	AGK
254.949	-0.0899751	0.154466	-0.582493	0.560235	0.998927	ENSG00000006534.16	ALDH3B1
2081.8	0.0309938	0.0589031	0.526182	0.598761	0.998927	ENSG00000006576.16	PHTF2
1346.26	-0.00167941	0.0746973	-0.0224829	0.982063	0.998927	ENSG00000006607.14	FARP2
1688.08	0.0820438	0.0649448	1.26328	0.206487	0.996213	ENSG00000006625.18	GGCT
1929.46	-0.00254225	0.0640893	-0.0396674	0.968358	0.998927	ENSG00000006634.8	DBF4
11.9571	-0.441968	0.696886	-0.634204	0.525948	NA	ENSG00000006638.11	TBXA2R
1295.43	0.373606	0.0766202	4.87608	1.08217e-06	0.000115911	ENSG00000006652.14	IFRD1
374.009	0.295171	0.124724	2.3666	0.0179526	0.326983	ENSG00000006695.11	COX10
424.662	0.0790716	0.120693	0.655146	0.512374	0.998927	ENSG00000006704.10	GTF2IRD1
499.393	0.0480797	0.109365	0.439624	0.660209	0.998927	ENSG00000006712.15	PAF1
1068.32	-0.0749008	0.0775427	-0.965929	0.33408	0.998927	ENSG00000006715.16	VPS41
68.7419	0.111863	0.296183	0.377683	0.705666	0.998927	ENSG00000006740.17	ARHGAP44
1740.47	0.0134904	0.0645871	0.208872	0.834548	0.998927	ENSG00000006744.19	ELAC2
333.334	-0.0566447	0.13452	-0.421089	0.67369	0.998927	ENSG00000006756.16	ARSD
2357.93	0.128794	0.0570456	2.25774	0.0239621	0.385892	ENSG00000006831.10	ADIPOR2
30.2798	-0.168073	0.481424	-0.349117	0.727001	0.998927	ENSG00000006837.12	CDKL3
218.663	0.0691491	0.164354	0.420732	0.673951	0.998927	ENSG00000007047.15	MARK4
598.857	-0.0755289	0.0989624	-0.763207	0.44534	0.998927	ENSG00000007080.11	CCDC124
3131.21	-0.0481503	0.0488406	-0.985868	0.324198	0.998927	ENSG00000007168.13	PAFAH1B1
0.797401	-0.36837	2.5757	-0.143017	0.886277	NA	ENSG00000007171.17	NOS2
3099.78	-0.0336834	0.0518765	-0.6493	0.516145	0.998927	ENSG00000007202.15	KIAA0100
91.8606	-0.092248	0.25673	-0.359319	0.719356	0.998927	ENSG00000007237.18	GAS7
102.105	0.270148	0.2372	1.1389	0.254743	0.998927	ENSG00000007255.10	TRAPPC6A
38.2911	0.0672773	0.40163	0.167511	0.866968	0.998927	ENSG00000007264.15	MATK
221.287	0.102936	0.169267	0.60813	0.543101	0.998927	ENSG00000007341.19	ST7L
291.952	-0.0394535	0.146547	-0.26922	0.78776	0.998927	ENSG00000007372.22	PAX6
220.6	-0.200334	0.173911	-1.15193	0.249348	0.998927	ENSG00000007376.8	RPUSD1
79.2127	-0.0550908	0.297059	-0.185454	0.852873	0.998927	ENSG00000007384.15	RHBDF1
314.105	0.0364961	0.142665	0.255817	0.798092	0.998927	ENSG00000007392.16	LUC7L
9.02445	0.197291	0.800059	0.246596	0.805221	NA	ENSG00000007402.11	CACNA2D2
23.1188	0.0150071	0.496421	0.0302305	0.975883	NA	ENSG00000007516.13	BAIAP3
387.916	-0.00687607	0.128163	-0.0536512	0.957213	0.998927	ENSG00000007520.4	TSR3
140.512	0.141634	0.206269	0.686646	0.492306	0.998927	ENSG00000007541.16	PIGQ
199.204	0.0573544	0.181219	0.316492	0.751629	0.998927	ENSG00000007545.15	CRAMP1
102.866	-0.160789	0.238619	-0.673831	0.500419	0.998927	ENSG00000007866.21	TEAD3
1158.04	0.0510301	0.0758974	0.672356	0.501357	0.998927	ENSG00000007923.16	DNAJC11
221.396	0.565389	0.176444	3.20435	0.00135366	0.0530334	ENSG00000007944.15	MYLIP
7.97612	0.80992	0.892569	0.907403	0.364194	NA	ENSG00000007952.18	NOX1
291.634	-0.154253	0.145441	-1.06059	0.288878	0.998927	ENSG00000007968.7	E2F2
4554.31	0.0877371	0.0553145	1.58615	0.112706	0.836933	ENSG00000008018.9	PSMB1
2.52043	1.95861	1.68898	1.15963	0.246198	NA	ENSG00000008056.14	SYN1
163.834	-0.035712	0.189092	-0.18886	0.850202	0.998927	ENSG00000008083.14	JARID2
97.7128	-0.159842	0.241823	-0.660989	0.508619	0.998927	ENSG00000008086.11	CDKL5
415.714	0.224093	0.129812	1.72628	0.0842967	0.744451	ENSG00000008128.23	CDK11A
804.98	0.013722	0.0880893	0.155773	0.876212	0.998927	ENSG00000008130.15	NADK
0.600472	-1.29494	3.33727	-0.388025	0.697998	NA	ENSG00000008226.19	DLEC1
383.773	0.0909956	0.127227	0.715221	0.474472	0.998927	ENSG00000008256.16	CYTH3
290.856	-0.248367	0.14187	-1.75066	0.0800039	0.733651	ENSG00000008277.14	ADAM22
1960.7	-0.0138343	0.0589963	-0.234495	0.814601	0.998927	ENSG00000008282.8	SYPL1
453.408	-0.0406194	0.117075	-0.346953	0.728627	0.998927	ENSG00000008283.16	CYB561
3904.51	0.0530791	0.0463914	1.14416	0.252558	0.998927	ENSG00000008294.21	SPAG9
52.2621	0.122345	0.334937	0.365278	0.714904	0.998927	ENSG00000008300.17	CELSR3
2.30359	4.50837	2.03579	2.21455	0.0267908	NA	ENSG00000008311.15	AASS
9.01688	-0.517569	0.775728	-0.667205	0.504641	NA	ENSG00000008323.15	PLEKHG6
301.487	0.15366	0.147912	1.03886	0.298871	0.998927	ENSG00000008324.11	SS18L2
26.3837	0.316378	0.470331	0.672671	0.501157	NA	ENSG00000008382.15	MPND
970.298	0.105006	0.0832156	1.26186	0.206999	0.996213	ENSG00000008394.13	MGST1
760.665	0.092467	0.0893626	1.03474	0.300791	0.998927	ENSG00000008405.12	CRY1
643.618	-0.115916	0.102762	-1.12801	0.259316	0.998927	ENSG00000008441.16	NFIX
2.00628	0.194994	1.63319	0.119395	0.904963	NA	ENSG00000008513.16	ST3GAL1
1.60151	-0.371577	1.82053	-0.204104	0.838272	NA	ENSG00000008516.17	MMP25
2.7145	-1.22575	1.41696	-0.865058	0.387007	NA	ENSG00000008517.16	IL32
249.169	-0.00909451	0.170709	-0.0532751	0.957513	0.998927	ENSG00000008710.19	PKD1
38.9225	-0.1769	0.378326	-0.467587	0.64008	0.998927	ENSG00000008735.14	MAPK8IP2
465.125	-0.204696	0.114183	-1.7927	0.0730208	0.702818	ENSG00000008838.20	MED24
235.028	-0.0668727	0.159399	-0.419529	0.674829	0.998927	ENSG00000008853.16	RHOBTB2
439.582	-0.228245	0.117535	-1.94194	0.0521448	0.603048	ENSG00000008869.12	HEATR5B
2577.58	0.0293242	0.0667542	0.439287	0.660454	0.998927	ENSG00000008952.17	SEC62
13038.9	0.106338	0.0434642	2.44657	0.0144222	0.291313	ENSG00000008988.9	RPS20
14862.1	0.0267535	0.0364111	0.734761	0.462485	0.998927	ENSG00000009307.16	CSDE1
3928.49	0.00311643	0.0456292	0.068299	0.945548	0.998927	ENSG00000009335.18	UBE3C
1023.37	-0.168162	0.0793595	-2.11899	0.0340913	0.480696	ENSG00000009413.15	REV3L
32.7477	0.651836	0.441449	1.47658	0.139787	0.91225	ENSG00000009724.16	MASP2
117.442	-0.00764298	0.223557	-0.0341881	0.972727	0.998927	ENSG00000009780.15	FAM76A
0.983141	-0.958852	2.35769	-0.406691	0.684235	NA	ENSG00000009790.15	TRAF3IP3
177.819	0.197387	0.182922	1.07908	0.280554	0.998927	ENSG00000009830.11	POMT2
1553.58	0.0409667	0.0699364	0.585772	0.558029	0.998927	ENSG00000009844.16	VTA1
25.3065	0.269262	0.47313	0.569109	0.569282	NA	ENSG00000009950.16	MLXIPL
5497.72	-0.0758603	0.0400154	-1.89578	0.0579893	0.634513	ENSG00000009954.11	BAZ1B
773.861	-0.0670182	0.0926843	-0.72308	0.469631	0.998927	ENSG00000010017.13	RANBP9
1.46868	3.85845	2.2969	1.67985	0.0929855	NA	ENSG00000010030.14	ETV7
312.711	-0.0670147	0.146446	-0.457607	0.647235	0.998927	ENSG00000010072.16	SPRTN
601.589	-0.0594282	0.102211	-0.581427	0.560953	0.998927	ENSG00000010165.20	EEF1AKNMT
212.041	0.185553	0.172124	1.07802	0.281025	0.998927	ENSG00000010219.13	DYRK4
5886.67	0.0620267	0.0417	1.48745	0.136896	0.900524	ENSG00000010244.18	ZNF207
1431.12	-0.053249	0.0680583	-0.782403	0.433978	0.998927	ENSG00000010256.11	UQCRC1
991.255	0.03293	0.0898508	0.366497	0.713995	0.998927	ENSG00000010270.13	STARD3NL
1178.04	0.0169401	0.0781946	0.216641	0.828488	0.998927	ENSG00000010278.14	CD9
5607.65	-0.0496328	0.0460806	-1.07709	0.281441	0.998927	ENSG00000010292.13	NCAPD2
1.72983	-0.747662	1.81749	-0.411371	0.6808	NA	ENSG00000010295.19	IFFO1
17.6487	-0.352512	0.591841	-0.59562	0.551429	NA	ENSG00000010310.9	GIPR
126.179	-0.0103286	0.229366	-0.045031	0.964083	0.998927	ENSG00000010318.21	PHF7
21.9968	0.577905	0.512396	1.12785	0.259384	NA	ENSG00000010319.6	SEMA3G
444.294	0.0461893	0.115108	0.401267	0.688223	0.998927	ENSG00000010322.16	NISCH
0.586304	0.57604	3.18616	0.180795	0.856529	NA	ENSG00000010327.10	STAB1
101.479	-0.267499	0.239751	-1.11573	0.264536	0.998927	ENSG00000010361.13	FUZ
0.572624	-1.29504	3.39449	-0.381513	0.702823	NA	ENSG00000010379.16	SLC6A13
463.085	-0.0698544	0.117182	-0.59612	0.551095	0.998927	ENSG00000010404.18	IDS
275.635	-0.0253376	0.147474	-0.171811	0.863586	0.998927	ENSG00000010539.11	ZNF200
2.7453	-0.387313	1.43255	-0.270367	0.786878	NA	ENSG00000010610.10	CD4
52.6614	0.121497	0.326813	0.371763	0.710069	0.998927	ENSG00000010626.15	LRRC23
443.946	0.0208171	0.114946	0.181102	0.856287	0.998927	ENSG00000010704.18	HFE
349.37	0.0989975	0.143408	0.690319	0.489994	0.998927	ENSG00000010803.16	SCMH1
16.6771	0.280097	0.637227	0.439556	0.660259	NA	ENSG00000010810.17	FYN
92.817	-0.05743	0.269457	-0.213133	0.831224	0.998927	ENSG00000010818.10	HIVEP2
1939.52	0.0316142	0.060732	0.520552	0.602679	0.998927	ENSG00000011007.12	ELOA
444.768	-0.0138224	0.118483	-0.116661	0.907128	0.998927	ENSG00000011009.11	LYPLA2
132.369	-0.0600965	0.211959	-0.283529	0.776771	0.998927	ENSG00000011021.23	CLCN6
400.86	0.00464711	0.14455	0.0321489	0.974353	0.998927	ENSG00000011028.14	AC080038.1
2032.38	-0.00719308	0.171519	-0.0419374	0.966549	0.998927	ENSG00000011052.21	NME1-NME2
284.387	-0.0138441	0.144637	-0.0957164	0.923746	0.998927	ENSG00000011105.14	TSPAN9
411	-0.0965276	0.121452	-0.79478	0.426741	0.998927	ENSG00000011114.15	BTBD7
134.148	-0.10609	0.210461	-0.504085	0.614201	0.998927	ENSG00000011132.12	APBA3
141.496	-0.027075	0.201204	-0.134565	0.892956	0.998927	ENSG00000011143.16	MKS1
296.16	0.191006	0.141463	1.35022	0.176946	0.95952	ENSG00000011198.9	ABHD5
553.978	0.0383046	0.105274	0.363856	0.715965	0.998927	ENSG00000011243.18	AKAP8L
439.301	0.0297677	0.119372	0.24937	0.803074	0.998927	ENSG00000011258.16	MBTD1
1994.9	0.0934187	0.0615209	1.51849	0.128891	0.883425	ENSG00000011260.14	UTP18
1116.24	-0.105817	0.0772004	-1.37069	0.170473	0.952756	ENSG00000011275.18	RNF216
948.717	0.166567	0.0821257	2.02819	0.0425405	0.542206	ENSG00000011295.16	TTC19
6298.47	-0.00178258	0.0480978	-0.0370616	0.970436	0.998927	ENSG00000011304.20	PTBP1
41.8159	0.00325261	0.366952	0.00886386	0.992928	0.998927	ENSG00000011332.19	DPF1
32.7079	0.140524	0.429639	0.327075	0.743611	0.998927	ENSG00000011347.9	SYT7
491.059	-0.149339	0.108913	-1.37118	0.170319	0.952756	ENSG00000011376.11	LARS2
1634.76	-0.0777148	0.0659714	-1.17801	0.238794	0.998927	ENSG00000011405.13	PIK3C2A
214.037	0.19518	0.167128	1.16785	0.242869	0.998927	ENSG00000011422.12	PLAUR
13446.2	-0.0715427	0.039477	-1.81226	0.0699455	0.687735	ENSG00000011426.11	ANLN
441.157	-0.0639426	0.123997	-0.515679	0.606079	0.998927	ENSG00000011451.19	WIZ
877.3	-0.0994845	0.0840254	-1.18398	0.236421	0.998927	ENSG00000011454.17	RABGAP1
1.20218	0.603942	2.08799	0.289245	0.772394	NA	ENSG00000011465.17	DCN
176.703	0.0751016	0.178623	0.420449	0.674158	0.998927	ENSG00000011478.12	QPCTL
855.106	-0.0259361	0.0840209	-0.308686	0.75756	0.998927	ENSG00000011485.14	PPP5C
257.549	-0.0110139	0.162157	-0.0679214	0.945848	0.998927	ENSG00000011523.14	CEP68
571.082	-0.163384	0.119196	-1.37071	0.170464	0.952756	ENSG00000011566.15	MAP4K3
3.75352	0.704853	1.33139	0.529412	0.59652	NA	ENSG00000011590.14	ZBTB32
71.4528	0.0890162	0.280366	0.3175	0.750864	0.998927	ENSG00000011638.10	TMEM159
1382.11	-0.100481	0.0721546	-1.39258	0.163747	0.944243	ENSG00000012048.22	BRCA1
1254.44	0.0442853	0.0717804	0.616955	0.537264	0.998927	ENSG00000012061.15	ERCC1
5.1467	-0.378516	1.02747	-0.368396	0.712578	NA	ENSG00000012124.17	CD22
44.868	0.138098	0.362576	0.380881	0.703291	0.998927	ENSG00000012171.19	SEMA3B
1465.98	0.00577512	0.0672719	0.0858474	0.931588	0.998927	ENSG00000012174.12	MBTPS2
54.5726	-0.295846	0.324649	-0.91128	0.362148	0.998927	ENSG00000012211.13	PRICKLE3
493.125	-0.0120109	0.119137	-0.100816	0.919697	0.998927	ENSG00000012232.8	EXTL3
4404.5	0.0721152	0.047318	1.52405	0.127495	0.881182	ENSG00000012660.14	ELOVL5
78.9792	-0.082364	0.26575	-0.309931	0.756614	0.998927	ENSG00000012822.16	CALCOCO1
1163.6	-0.00303869	0.0748899	-0.0405754	0.967634	0.998927	ENSG00000012963.15	UBR7
835.342	-0.0286811	0.0877463	-0.326864	0.743771	0.998927	ENSG00000012983.11	MAP4K5
2332.64	0.119486	0.0556559	2.14688	0.031803	0.458438	ENSG00000013275.7	PSMC4
127.625	-0.272107	0.218467	-1.24553	0.212936	0.998927	ENSG00000013288.8	MAN2B2
0.890606	3.12219	2.96786	1.052	0.2928	NA	ENSG00000013293.6	SLC7A14
789.168	-0.168404	0.0921343	-1.8278	0.0675789	0.675962	ENSG00000013297.11	CLDN11
1516.74	0.0338881	0.0661998	0.511906	0.608717	0.998927	ENSG00000013306.16	SLC25A39
351.909	0.0145508	0.131314	0.11081	0.911767	0.998927	ENSG00000013364.19	MVP
1159.49	0.0785621	0.0782495	1.00399	0.315382	0.998927	ENSG00000013374.16	NUB1
483.999	-0.129019	0.111834	-1.15367	0.248635	0.998927	ENSG00000013375.16	PGM3
18.6597	-0.475997	0.552733	-0.86117	0.389144	NA	ENSG00000013392.8	RWDD2A
967.122	0.01737	0.083913	0.207	0.83601	0.998927	ENSG00000013441.16	CLK1
393.62	-0.143845	0.124884	-1.15184	0.249389	0.998927	ENSG00000013503.10	POLR3B
254.853	-0.0690419	0.15539	-0.444314	0.656815	0.998927	ENSG00000013523.9	ANGEL1
1313.93	0.00258175	0.0748055	0.0345128	0.972468	0.998927	ENSG00000013561.18	RNF14
172.584	-0.0301064	0.187938	-0.160193	0.872729	0.998927	ENSG00000013563.14	DNASE1L1
827.32	-0.0747273	0.0914305	-0.817313	0.41375	0.998927	ENSG00000013573.17	DDX11
434.641	0.0224662	0.119353	0.188234	0.850693	0.998927	ENSG00000013583.10	HEBP1
10376.4	0.143882	0.0432822	3.32427	0.000886499	0.0395033	ENSG00000013588.8	GPRC5A
7.70417	0.249853	0.870755	0.286938	0.77416	NA	ENSG00000013619.14	MAMLD1
1457.21	-0.0856862	0.0691641	-1.23888	0.215389	0.998927	ENSG00000013810.19	TACC3
855.681	-0.109586	0.0862282	-1.27088	0.203772	0.995145	ENSG00000014123.10	UFL1
594.697	0.02514	0.0994024	0.252912	0.800336	0.998927	ENSG00000014138.9	POLA2
168.645	-0.0132151	0.189536	-0.0697234	0.944414	0.998927	ENSG00000014164.7	ZC3H3
884.248	-0.0627727	0.0862874	-0.727484	0.466929	0.998927	ENSG00000014216.15	CAPN1
0.592044	-1.2673	3.35403	-0.377845	0.705545	NA	ENSG00000014257.16	ACPP
3430.12	0.0348333	0.0589086	0.591311	0.554312	0.998927	ENSG00000014641.18	MDH1
1234.78	-0.0297532	0.0771096	-0.385856	0.699603	0.998927	ENSG00000014824.14	SLC30A9
59.8758	-0.208978	0.315356	-0.662673	0.50754	0.998927	ENSG00000014914.21	MTMR11
1269.45	0.00610898	0.070601	0.0865282	0.931047	0.998927	ENSG00000014919.12	COX15
145.694	-0.187497	0.202244	-0.927083	0.353883	0.998927	ENSG00000015133.19	CCDC88C
200.166	-0.118674	0.175045	-0.677962	0.497796	0.998927	ENSG00000015153.14	YAF2
1538.62	0.0633673	0.06613	0.958224	0.33795	0.998927	ENSG00000015171.19	ZMYND11
12.0202	-0.176119	0.702394	-0.250742	0.802014	NA	ENSG00000015285.10	WAS
873.918	0.139745	0.0892334	1.56607	0.117333	0.856166	ENSG00000015475.18	BID
9569.62	0.0134388	0.0471948	0.284752	0.775834	0.998927	ENSG00000015479.18	MATR3
254.528	-0.223674	0.14983	-1.49285	0.135477	0.896144	ENSG00000015532.9	XYLT2
31.4998	0.161148	0.429781	0.374953	0.707695	0.998927	ENSG00000015568.13	RGPD5
0.432625	2.0869	3.81929	0.546412	0.584783	NA	ENSG00000015592.16	STMN4
1130.95	0.00395875	0.082438	0.0480209	0.9617	0.998927	ENSG00000015676.18	NUDCD3
319.748	-0.173805	0.135986	-1.27812	0.201209	0.991552	ENSG00000016391.11	CHDH
367.388	-0.0295104	0.12742	-0.231599	0.816849	0.998927	ENSG00000016864.18	GLT8D1
2266.75	-0.0419032	0.0567459	-0.738436	0.46025	0.998927	ENSG00000017260.19	ATP2C1
0.367267	-2.24296	3.95796	-0.566694	0.570922	NA	ENSG00000017483.15	SLC38A5
2167.34	0.0248303	0.0572653	0.433602	0.664578	0.998927	ENSG00000017797.13	RALBP1
246.861	-0.177136	0.153609	-1.15317	0.248842	0.998927	ENSG00000018189.13	RUFY3
3.765	0.0776528	1.2714	0.0610764	0.951298	NA	ENSG00000018280.17	SLC11A1
2889.43	-0.112248	0.0542279	-2.06992	0.0384594	0.515516	ENSG00000018408.14	WWTR1
1633.06	-0.0233144	0.069908	-0.333502	0.738755	0.998927	ENSG00000018510.15	AGPS
871.692	0.0902433	0.0857842	1.05198	0.292808	0.998927	ENSG00000018610.14	CXorf56
710.389	0.0341764	0.0952006	0.358993	0.7196	0.998927	ENSG00000018699.13	TTC27
7.31089	-0.15928	0.878424	-0.181324	0.856113	NA	ENSG00000018869.16	ZNF582
3.2097	1.18242	1.39013	0.850585	0.395	NA	ENSG00000019102.12	VSIG2
280.624	-0.0425811	0.149406	-0.285003	0.775642	0.998927	ENSG00000019144.19	PHLDB1
39.6109	-0.614735	0.402737	-1.52639	0.126912	0.878826	ENSG00000019485.13	PRDM11
51.799	-0.174318	0.333749	-0.522303	0.601459	0.998927	ENSG00000019549.12	SNAI2
7.44208	0.0135351	0.911658	0.0148467	0.988155	NA	ENSG00000019582.15	CD74
615.796	0.114791	0.102875	1.11583	0.264495	0.998927	ENSG00000019995.6	ZRANB1
403.977	0.069181	0.126572	0.546573	0.584672	0.998927	ENSG00000020129.16	NCDN
32.6741	0.0340557	0.440343	0.0773391	0.938354	0.998927	ENSG00000020181.17	ADGRA2
100.706	-0.00635506	0.236721	-0.0268463	0.978582	0.998927	ENSG00000020256.20	ZFP64
837.479	0.150749	0.0877775	1.71739	0.085907	0.750664	ENSG00000020426.11	MNAT1
226.606	-0.0430313	0.16425	-0.261987	0.793332	0.998927	ENSG00000020577.13	SAMD4A
951.672	-0.00217238	0.0798674	-0.0271998	0.9783	0.998927	ENSG00000020922.12	MRE11
3.36214	0.111042	1.2728	0.0872419	0.930479	NA	ENSG00000021300.14	PLEKHB1
876.446	-0.00621359	0.0920014	-0.0675379	0.946153	0.998927	ENSG00000021355.13	SERPINB1
1.27078	1.97622	2.49753	0.791269	0.428787	NA	ENSG00000021488.13	SLC7A9
595.95	-0.032221	0.101645	-0.316994	0.751248	0.998927	ENSG00000021574.12	SPAST
125.593	-0.058108	0.21424	-0.271228	0.786215	0.998927	ENSG00000021762.20	OSBPL5
1861.73	-0.0553478	0.0602927	-0.917986	0.358626	0.998927	ENSG00000021776.11	AQR
181.627	-0.113701	0.183743	-0.618806	0.536044	0.998927	ENSG00000021826.15	CPS1
108.402	-0.150623	0.227913	-0.66088	0.508689	0.998927	ENSG00000022267.17	FHL1
1636.91	0.0109911	0.0630793	0.174242	0.861675	0.998927	ENSG00000022277.12	RTF2
166.414	0.237188	0.193516	1.22567	0.220321	0.998927	ENSG00000022567.9	SLC45A4
1528.16	0.0631121	0.0666271	0.947244	0.343514	0.998927	ENSG00000022840.16	RNF10
188.621	-0.166247	0.184179	-0.902639	0.366717	0.998927	ENSG00000022976.15	ZNF839
584.211	0.10135	0.131318	0.771789	0.440239	0.998927	ENSG00000023041.11	ZDHHC6
141.214	-0.0986556	0.20484	-0.481623	0.630074	0.998927	ENSG00000023171.18	GRAMD1B
1309.98	0.0106958	0.0800469	0.133619	0.893704	0.998927	ENSG00000023191.17	RNH1
2954.89	-0.0137387	0.0520405	-0.264	0.79178	0.998927	ENSG00000023228.14	NDUFS1
2097.25	0.0353958	0.0611885	0.57847	0.562947	0.998927	ENSG00000023287.13	RB1CC1
1069.26	0.0386501	0.0779819	0.49563	0.620156	0.998927	ENSG00000023318.8	ERP44
887.115	0.161665	0.0834001	1.93843	0.0525707	0.604261	ENSG00000023330.15	ALAS1
1060.94	-0.0218874	0.079948	-0.27377	0.784262	0.998927	ENSG00000023445.14	BIRC3
797.514	-0.184291	0.096632	-1.90714	0.0565022	0.629738	ENSG00000023516.9	AKAP11
503.481	0.0627982	0.113515	0.553216	0.580116	0.998927	ENSG00000023572.9	GLRX2
583.676	0.168936	0.118512	1.42547	0.154021	0.926304	ENSG00000023608.5	SNAPC1
1206.1	0.0158768	0.0768162	0.206685	0.836256	0.998927	ENSG00000023697.13	DERA
5304.76	0.0734996	0.0440246	1.66951	0.0950164	0.770707	ENSG00000023734.11	STRAP
168.648	0.0815213	0.191992	0.424608	0.671122	0.998927	ENSG00000023839.11	ABCC2
509.26	0.0174625	0.110616	0.157865	0.874563	0.998927	ENSG00000023892.11	DEF6
125.242	-0.0135368	0.231544	-0.0584631	0.95338	0.998927	ENSG00000023902.14	PLEKHO1
2578.77	0.0614006	0.0533012	1.15196	0.249339	0.998927	ENSG00000023909.10	GCLM
1063.04	-0.110973	0.0792781	-1.3998	0.161574	0.940366	ENSG00000024048.10	UBR2
196.024	-0.0536156	0.183396	-0.292348	0.77002	0.998927	ENSG00000024422.12	EHD2
2375.55	-0.0785631	0.0560936	-1.40057	0.161343	0.940366	ENSG00000024526.17	DEPDC1
209.682	0.00927261	0.168515	0.0550254	0.956118	0.998927	ENSG00000024862.17	CCDC28A
494.329	0.0521606	0.110122	0.473664	0.63574	0.998927	ENSG00000025039.14	RRAGD
483.353	0.11429	0.113624	1.00586	0.314481	0.998927	ENSG00000025156.12	HSF2
1164.59	-0.0103333	0.0734473	-0.140691	0.888114	0.998927	ENSG00000025293.17	PHF20
9.09878	0.913602	0.825461	1.10678	0.26839	NA	ENSG00000025423.11	HSD17B6
70.9557	0.0357952	0.306428	0.116814	0.907007	0.998927	ENSG00000025434.19	NR1H3
6.84267	-0.35497	0.981368	-0.361709	0.717569	NA	ENSG00000025708.14	TYMP
661.283	-0.0144773	0.103621	-0.139713	0.888887	0.998927	ENSG00000025770.19	NCAPH2
1153.64	0.00436035	0.0738845	0.0590157	0.95294	0.998927	ENSG00000025772.8	TOMM34
1656.68	0.000457396	0.0630545	0.00725399	0.994212	0.998927	ENSG00000025796.14	SEC63
3692.15	0.00763666	0.0473502	0.16128	0.871873	0.998927	ENSG00000025800.14	KPNA6
49903.1	-0.0301033	0.0287613	-1.04666	0.295255	0.998927	ENSG00000026025.16	VIM
82.181	-0.315569	0.37727	-0.836453	0.4029	0.998927	ENSG00000026036.22	RTEL1-TNFRSF6B
50.3642	0.550122	0.348924	1.57663	0.114882	0.84728	ENSG00000026103.22	FAS
112.359	0.0893727	0.234416	0.381256	0.703013	0.998927	ENSG00000026297.15	RNASET2
12331	0.0711538	0.0328179	2.16814	0.030148	0.441074	ENSG00000026508.18	CD44
32.4833	-0.00255375	0.421223	-0.0060627	0.995163	0.998927	ENSG00000026652.14	AGPAT4
30.0123	-0.300562	0.458053	-0.656174	0.511712	0.998927	ENSG00000026950.17	BTN3A1
282.076	0.0398881	0.155543	0.256444	0.797608	0.998927	ENSG00000027001.10	MIPEP
62.0884	-0.011791	0.306653	-0.0384507	0.969328	0.998927	ENSG00000027075.15	PRKCH
331.996	0.209147	0.144801	1.44438	0.148633	0.924012	ENSG00000027697.14	IFNGR1
162.009	0.0241962	0.191644	0.126256	0.899529	0.998927	ENSG00000027847.14	B4GALT7
33.5846	-0.121829	0.41615	-0.292752	0.769712	0.998927	ENSG00000027869.11	SH2D2A
568.068	-0.0825601	0.103975	-0.794037	0.427174	0.998927	ENSG00000028116.17	VRK2
102.358	-0.128984	0.232938	-0.553727	0.579765	0.998927	ENSG00000028137.19	TNFRSF1B
1044.16	-0.108375	0.0829913	-1.30586	0.191599	0.975544	ENSG00000028203.18	VEZT
4.92117	-0.282254	1.05267	-0.268131	0.788599	NA	ENSG00000028277.21	POU2F2
693.94	0.000777144	0.102843	0.00755659	0.993971	0.998927	ENSG00000028310.18	BRD9
740.302	-0.0280837	0.0965483	-0.290877	0.771145	0.998927	ENSG00000028528.15	SNX1
484.931	-0.0361479	0.112564	-0.321132	0.74811	0.998927	ENSG00000028839.10	TBPL1
65.3794	-0.306111	0.295966	-1.03428	0.301007	0.998927	ENSG00000029153.14	ARNTL2
9856	0.142741	0.0382695	3.7299	0.000191554	0.0113522	ENSG00000029363.16	BCLAF1
1265.53	-2.16405e-05	0.0777729	-0.000278253	0.999778	0.999983	ENSG00000029364.12	SLC39A9
588.807	-0.0889755	0.102636	-0.866907	0.385993	0.998927	ENSG00000029534.20	ANK1
166.279	-0.0920919	0.185207	-0.497237	0.619022	0.998927	ENSG00000029639.11	TFB1M
1966.46	-0.0420606	0.0611311	-0.688039	0.491428	0.998927	ENSG00000029725.17	RABEP1
2368.1	0.0569144	0.0632731	0.899505	0.368384	0.998927	ENSG00000029993.15	HMGB3
2791.49	-0.0752386	0.0515711	-1.45893	0.144585	0.917904	ENSG00000030066.13	NUP160
551.977	0.0602232	0.105601	0.57029	0.568481	0.998927	ENSG00000030110.13	BAK1
398.569	-0.281104	0.124271	-2.26202	0.0236964	0.385313	ENSG00000030419.16	IKZF2
560.172	-0.0393075	0.11726	-0.335216	0.737462	0.998927	ENSG00000030582.18	GRN
887.497	0.117886	0.0890161	1.32432	0.185398	0.966049	ENSG00000031003.10	FAM13B
9.29603	-0.0904741	0.796308	-0.113617	0.909541	NA	ENSG00000031081.10	ARHGAP31
464.109	-0.0136359	0.12208	-0.111697	0.911064	0.998927	ENSG00000031691.7	CENPQ
2036.6	0.0657474	0.0612441	1.07353	0.283034	0.998927	ENSG00000031698.13	SARS
604.553	-0.122411	0.101689	-1.20378	0.228675	0.998927	ENSG00000031823.14	RANBP3
689.174	-0.0918829	0.0965217	-0.95194	0.341128	0.998927	ENSG00000032219.18	ARID4A
461.568	-0.00277907	0.122192	-0.0227434	0.981855	0.998927	ENSG00000032389.12	EIPR1
276.083	0.0315991	0.150072	0.21056	0.833231	0.998927	ENSG00000032444.16	PNPLA6
275.406	0.0417687	0.147166	0.283819	0.776549	0.998927	ENSG00000032742.17	IFT88
319.074	0.102367	0.144496	0.708442	0.478671	0.998927	ENSG00000033011.12	ALG1
728.183	0.104122	0.0962013	1.08234	0.279103	0.998927	ENSG00000033030.13	ZCCHC8
1348.45	-0.027283	0.0717128	-0.380449	0.703612	0.998927	ENSG00000033050.9	ABCF2
387.596	-0.125107	0.125397	-0.997689	0.31843	0.998927	ENSG00000033100.16	CHPF2
5.62516	-0.893631	0.986317	-0.906029	0.364921	NA	ENSG00000033122.19	LRRC7
440.329	-0.0187592	0.117063	-0.160249	0.872685	0.998927	ENSG00000033170.16	FUT8
1370.48	0.0168555	0.0762352	0.221098	0.825016	0.998927	ENSG00000033178.13	UBA6
19.0798	0.263553	0.549832	0.479333	0.631702	NA	ENSG00000033327.13	GAB2
251.31	-0.078106	0.153094	-0.510184	0.609923	0.998927	ENSG00000033627.16	ATP6V0A1
651.862	-0.102124	0.102973	-0.991758	0.321315	0.998927	ENSG00000033800.13	PIAS1
689.892	0.0258905	0.0941187	0.275084	0.783252	0.998927	ENSG00000033867.16	SLC4A7
80.9014	-0.117325	0.280613	-0.418104	0.675871	0.998927	ENSG00000034053.14	APBA2
618.504	0.218034	0.0989283	2.20396	0.0275268	0.41683	ENSG00000034152.18	MAP2K3
13158.9	0.117808	0.0416176	2.83072	0.00464431	0.127582	ENSG00000034510.6	TMSB10
114.608	-0.501222	0.221445	-2.26341	0.0236104	0.38516	ENSG00000034533.11	ASTE1
407.893	-0.0585132	0.12441	-0.470325	0.638123	0.998927	ENSG00000034677.13	RNF19A
498.352	0.144104	0.11539	1.24884	0.211725	0.998927	ENSG00000034693.15	PEX3
698.858	0.0721601	0.0974482	0.740497	0.458999	0.998927	ENSG00000034713.8	GABARAPL2
55.5027	0.0408123	0.321038	0.127126	0.898841	0.998927	ENSG00000035115.21	SH3YL1
2452.59	0.0610133	0.0624692	0.976694	0.328721	0.998927	ENSG00000035141.8	FAM136A
4395.8	-0.00728103	0.0467698	-0.155678	0.876287	0.998927	ENSG00000035403.17	VCL
1076.63	0.00652357	0.0771604	0.0845455	0.932623	0.998927	ENSG00000035499.13	DEPDC1B
6.56238	0.58753	0.973165	0.603731	0.546023	NA	ENSG00000035664.11	DAPK2
1093.82	0.0196884	0.0774401	0.25424	0.79931	0.998927	ENSG00000035681.9	NSMAF
1193.13	0.0379621	0.0756659	0.501708	0.615873	0.998927	ENSG00000035687.10	ADSS
2019.78	-0.0606184	0.06396	-0.947755	0.343254	0.998927	ENSG00000035862.12	TIMP2
2675.08	-0.0405792	0.0589498	-0.688369	0.491221	0.998927	ENSG00000035928.16	RFC1
1013.69	0.0251559	0.0825365	0.304785	0.76053	0.998927	ENSG00000036054.13	TBC1D23
2069.86	-0.0224864	0.0644425	-0.348938	0.727136	0.998927	ENSG00000036257.13	CUL3
2.05776	0.245596	1.75018	0.140326	0.888403	NA	ENSG00000036530.8	CYP46A1
1281.3	0.12493	0.0755311	1.65402	0.0981228	0.777722	ENSG00000036549.13	AC118549.1
22.2564	0.433513	0.523341	0.828358	0.407468	NA	ENSG00000036672.16	USP2
105.425	-0.129977	0.23994	-0.541707	0.588021	0.998927	ENSG00000037042.9	TUBG2
983.258	0.030592	0.0846148	0.361544	0.717693	0.998927	ENSG00000037241.7	RPL26L1
2785.39	0.0703844	0.0534378	1.31713	0.187796	0.970571	ENSG00000037474.15	NSUN2
387.843	-0.0297838	0.124032	-0.240129	0.81023	0.998927	ENSG00000037637.11	FBXO42
362.858	-0.0614558	0.127722	-0.48117	0.630396	0.998927	ENSG00000037749.12	MFAP3
409.966	-0.0124748	0.124058	-0.100556	0.919903	0.998927	ENSG00000037757.14	MRI1
136.947	-0.159521	0.222183	-0.717971	0.472775	0.998927	ENSG00000037897.17	METTL1
132.821	-0.0808209	0.206192	-0.391968	0.695082	0.998927	ENSG00000037965.6	HOXC8
114.676	-0.13311	0.224288	-0.593477	0.552862	0.998927	ENSG00000038002.9	AGA
702.542	0.0649438	0.103579	0.626998	0.53066	0.998927	ENSG00000038210.13	PI4K2B
1023.86	-0.123234	0.0802429	-1.53576	0.124597	0.869592	ENSG00000038219.13	BOD1L1
1226.81	-0.014794	0.0737244	-0.200666	0.84096	0.998927	ENSG00000038274.17	MAT2B
1280.9	-0.0533037	0.0853575	-0.624475	0.532315	0.998927	ENSG00000038358.15	EDC4
1258.25	-0.0813698	0.071563	-1.13704	0.255523	0.998927	ENSG00000038382.20	TRIO
1285.21	-0.121369	0.0700529	-1.73253	0.0831797	0.742807	ENSG00000038427.16	VCAN
162.906	0.144716	0.195008	0.742102	0.458025	0.998927	ENSG00000038532.16	CLEC16A
3365.32	0.0603713	0.0477802	1.26352	0.206402	0.996213	ENSG00000039123.16	MTREX
39.9478	0.522143	0.387849	1.34625	0.178222	0.960321	ENSG00000039139.9	DNAH5
1293.14	0.0410899	0.0787152	0.522007	0.601665	0.998927	ENSG00000039319.17	ZFYVE16
455.532	-0.0104061	0.117674	-0.088431	0.929534	0.998927	ENSG00000039523.20	RIPOR1
143.839	-0.126407	0.197845	-0.63892	0.522875	0.998927	ENSG00000039560.14	RAI14
1.80016	-0.0637068	1.84365	-0.0345547	0.972435	NA	ENSG00000039600.11	SOX30
106.935	0.10454	0.233251	0.448186	0.654019	0.998927	ENSG00000039650.12	PNKP
0.410517	-0.276517	3.9292	-0.070375	0.943895	NA	ENSG00000039987.6	BEST2
1279.41	-0.0886652	0.0738709	-1.20027	0.230034	0.998927	ENSG00000040199.18	PHLPP2
1095.21	-0.0430588	0.0765898	-0.5622	0.57398	0.998927	ENSG00000040275.17	SPDL1
331.836	-0.138388	0.145117	-0.953625	0.340273	0.998927	ENSG00000040341.18	STAU2
107.808	0.0222953	0.234397	0.0951176	0.924221	0.998927	ENSG00000040487.13	PQLC2
110.325	0.140114	0.244407	0.573281	0.566455	0.998927	ENSG00000040531.14	CTNS
45.6419	-0.466377	0.361427	-1.29038	0.19692	0.984323	ENSG00000040608.14	RTN4R
569.263	-0.178318	0.107053	-1.6657	0.0957741	0.772211	ENSG00000040633.13	PHF23
330.443	0.00902812	0.13949	0.0647225	0.948395	0.998927	ENSG00000040933.15	INPP4A
7629.43	-0.0833274	0.0407718	-2.04375	0.0409781	0.533185	ENSG00000041353.10	RAB27B
3057.96	0.109	0.0594502	1.83347	0.0667322	0.671772	ENSG00000041357.16	PSMA4
1.62189	0.361296	1.93836	0.186393	0.852137	NA	ENSG00000041515.16	MYO16
1599.7	0.0984816	0.0657096	1.49874	0.133941	0.89154	ENSG00000041802.11	LSG1
166.394	0.165903	0.188635	0.879492	0.379134	0.998927	ENSG00000041880.14	PARP3
311.956	-0.0377956	0.138132	-0.27362	0.784377	0.998927	ENSG00000041982.16	TNC
168.222	0.149875	0.184132	0.813957	0.415669	0.998927	ENSG00000041988.15	THAP3
2.34647	-0.401276	1.53592	-0.261262	0.793891	NA	ENSG00000042062.12	RIPOR3
333.421	-0.0463357	0.143679	-0.322494	0.747078	0.998927	ENSG00000042088.13	TDP1
357.9	0.133676	0.128479	1.04044	0.298133	0.998927	ENSG00000042286.15	AIFM2
49.378	-0.0966486	0.338138	-0.285826	0.775011	0.998927	ENSG00000042317.17	SPATA7
968.299	0.115575	0.0827537	1.39661	0.162529	0.94217	ENSG00000042429.12	MED17
469.079	0.0946697	0.11911	0.79481	0.426724	0.998927	ENSG00000042445.14	RETSAT
599.554	-0.0167227	0.0995835	-0.167926	0.866641	0.998927	ENSG00000042493.16	CAPG
1738.07	0.0280676	0.0645591	0.434758	0.663738	0.998927	ENSG00000042753.11	AP2S1
364.499	-0.0128942	0.127294	-0.101295	0.919317	0.998927	ENSG00000043039.6	BARX2
1511.01	0.0165399	0.0718946	0.230057	0.818047	0.998927	ENSG00000043093.14	DCUN1D1
1498.64	-0.291765	0.0699896	-4.1687	3.06346e-05	0.00239093	ENSG00000043143.20	JADE2
63.4516	0.0748658	0.307343	0.24359	0.807548	0.998927	ENSG00000043355.12	ZIC2
333.984	0.061674	0.152895	0.403375	0.686672	0.998927	ENSG00000043514.16	TRIT1
5.81769	0.990925	1.02288	0.968757	0.332667	NA	ENSG00000043591.5	ADRB1
308.301	-0.148209	0.138958	-1.06658	0.286163	0.998927	ENSG00000044090.8	CUL7
4685.91	-0.0259609	0.0445957	-0.582138	0.560474	0.998927	ENSG00000044115.21	CTNNA1
697.019	0.044881	0.0934684	0.480173	0.631104	0.998927	ENSG00000044446.11	PHKA2
456.53	-0.0277277	0.113928	-0.243378	0.807713	0.998927	ENSG00000044459.15	CNTLN
3.77667	-0.220632	1.19939	-0.183954	0.854049	NA	ENSG00000044524.11	EPHA3
9543	0.261005	0.0398962	6.5421	6.06591e-11	1.22103e-08	ENSG00000044574.8	HSPA5
112.55	0.273789	0.227837	1.20169	0.229483	0.998927	ENSG00000046604.13	DSG2
112.63	0.0106099	0.233404	0.0454571	0.963743	0.998927	ENSG00000046647.13	GEMIN8
542.104	-0.0669866	0.109922	-0.609401	0.542259	0.998927	ENSG00000046651.15	OFD1
82.9529	-0.0593605	0.273877	-0.216741	0.82841	0.998927	ENSG00000046653.15	GPM6B
264.491	0.271298	0.16571	1.63719	0.101591	0.791243	ENSG00000047056.15	WDR37
613.146	-0.0434133	0.0980747	-0.442655	0.658015	0.998927	ENSG00000047188.16	YTHDC2
763.396	0.0175154	0.0934315	0.187467	0.851294	0.998927	ENSG00000047230.15	CTPS2
728.826	0.0293632	0.0968801	0.303087	0.761823	0.998927	ENSG00000047249.18	ATP6V1H
3341.96	-0.0439711	0.0542998	-0.809783	0.418065	0.998927	ENSG00000047315.16	POLR2B
121.595	-0.0190709	0.218025	-0.0874712	0.930297	0.998927	ENSG00000047346.12	FAM214A
4579.45	-0.103045	0.0436608	-2.36013	0.0182686	0.330676	ENSG00000047410.14	TPR
228.096	0.0182428	0.159141	0.114633	0.908736	0.998927	ENSG00000047457.14	CP
154.271	-0.0719861	0.193724	-0.371591	0.710197	0.998927	ENSG00000047578.13	KIAA0556
132.063	-0.118989	0.21121	-0.563368	0.573184	0.998927	ENSG00000047579.19	DTNBP1
831.811	-0.0113276	0.0890422	-0.127216	0.89877	0.998927	ENSG00000047621.12	C12orf4
327.436	-0.011795	0.142108	-0.0830001	0.933851	0.998927	ENSG00000047644.18	WWC3
0.385161	-0.276474	4.02048	-0.0687664	0.945176	NA	ENSG00000047648.22	ARHGAP6
0.586304	0.57604	3.18616	0.180795	0.856529	NA	ENSG00000047662.4	FAM184B
3161.98	0.0219301	0.0557529	0.393345	0.694065	0.998927	ENSG00000047849.21	MAP4
810.922	-0.147572	0.0884186	-1.66901	0.0951147	0.770707	ENSG00000047932.14	GOPC
505.586	-0.08216	0.110445	-0.7439	0.456937	0.998927	ENSG00000048028.11	USP28
926.436	-0.201286	0.0869912	-2.31387	0.0206751	0.357662	ENSG00000048052.21	HDAC9
813.256	0.0642763	0.0886177	0.725321	0.468255	0.998927	ENSG00000048140.18	TSPAN17
1487.22	0.213505	0.0750422	2.84513	0.00443929	0.123992	ENSG00000048162.20	NOP16
80.8734	0.197008	0.281201	0.700594	0.483556	0.998927	ENSG00000048342.16	CC2D2A
686.708	-0.0314186	0.0940675	-0.334001	0.738379	0.998927	ENSG00000048392.11	RRM2B
837.145	0.12884	0.0903089	1.42666	0.153677	0.925643	ENSG00000048405.10	ZNF800
102.537	0.112483	0.235277	0.47809	0.632586	0.998927	ENSG00000048471.14	SNX29
1417.48	0.047275	0.0685334	0.689809	0.490314	0.998927	ENSG00000048544.6	MRPS10
2489.91	-0.1081	0.0564549	-1.9148	0.0555177	0.622043	ENSG00000048649.13	RSF1
651.8	-0.0313669	0.0975177	-0.321653	0.747716	0.998927	ENSG00000048707.15	VPS13D
3040.35	-0.022187	0.055396	-0.400516	0.688776	0.998927	ENSG00000048828.17	FAM120A
1174.99	-0.0286175	0.0762801	-0.375164	0.707539	0.998927	ENSG00000048991.16	R3HDM1
11.6865	0.1475	0.709391	0.207925	0.835288	NA	ENSG00000049089.15	COL9A2
2.51909	-2.05387	1.72821	-1.18844	0.234661	NA	ENSG00000049130.15	KITLG
232.619	0.116364	0.165287	0.70401	0.481426	0.998927	ENSG00000049167.14	ERCC8
2.28102	1.05082	1.62956	0.644853	0.519023	NA	ENSG00000049192.15	ADAMTS6
505.861	0.0310377	0.112161	0.276726	0.781991	0.998927	ENSG00000049239.12	H6PD
2520.23	0.0564225	0.0565269	0.998152	0.318205	0.998927	ENSG00000049245.13	VAMP3
317.271	-0.144784	0.134234	-1.07859	0.280769	0.998927	ENSG00000049246.14	PER3
15.3654	-0.181086	0.631131	-0.286922	0.774172	NA	ENSG00000049249.8	TNFRSF9
0.410517	-0.276517	3.9292	-0.070375	0.943895	NA	ENSG00000049283.18	EPN3
32.4294	0.230577	0.436848	0.527819	0.597625	0.998927	ENSG00000049323.16	LTBP1
3154.91	0.037287	0.0507867	0.734188	0.462834	0.998927	ENSG00000049449.9	RCN1
2060.36	0.0726603	0.0575895	1.26169	0.20706	0.996213	ENSG00000049541.11	RFC2
1738.26	0.0234386	0.0671712	0.348939	0.727135	0.998927	ENSG00000049656.14	CLPTM1L
1115.07	-0.0678095	0.0770894	-0.879622	0.379064	0.998927	ENSG00000049759.18	NEDD4L
2.65698	0.804423	1.4788	0.543971	0.586461	NA	ENSG00000049768.15	FOXP3
89.6464	0.151903	0.251897	0.603036	0.546485	0.998927	ENSG00000049769.13	PPP1R3F
1922.86	0.0446866	0.0616796	0.724495	0.468762	0.998927	ENSG00000049860.14	HEXB
445.006	-0.109674	0.116638	-0.940289	0.34707	0.998927	ENSG00000049883.15	PTCD2
570.664	0.0331028	0.108657	0.304655	0.760629	0.998927	ENSG00000050130.18	JKAMP
1.84418	0.641033	1.74027	0.368352	0.712611	NA	ENSG00000050165.17	DKK3
1502.34	-0.0539351	0.069472	-0.776357	0.437538	0.998927	ENSG00000050344.9	NFE2L3
819.494	0.023389	0.0920527	0.254083	0.799431	0.998927	ENSG00000050393.11	MCUR1
5552.84	-0.022	0.0434658	-0.506145	0.612755	0.998927	ENSG00000050405.13	LIMA1
411.693	-0.0737717	0.126427	-0.583511	0.55955	0.998927	ENSG00000050426.16	LETMD1
43.3521	-0.2142	0.359338	-0.596096	0.551111	0.998927	ENSG00000050438.17	SLC4A8
29.5489	0.201377	0.444052	0.453499	0.650189	0.998927	ENSG00000050555.18	LAMC3
1001.41	0.0397133	0.084176	0.47179	0.637077	0.998927	ENSG00000050748.17	MAPK9
756.24	-0.116354	0.0999029	-1.16467	0.244154	0.998927	ENSG00000050820.17	BCAR1
214.166	-0.140903	0.164159	-0.858329	0.390711	0.998927	ENSG00000051009.10	FAM160A2
789.243	0.91756	0.0909451	10.0892	6.16893e-24	5.14445e-21	ENSG00000051108.15	HERPUD1
477.177	0.0616354	0.110971	0.555417	0.578609	0.998927	ENSG00000051128.19	HOMER3
308.835	0.201959	0.137925	1.46427	0.143121	0.916087	ENSG00000051180.17	RAD51
916.325	-0.187322	0.0832853	-2.24916	0.0245022	0.390264	ENSG00000051341.14	POLQ
620.366	-0.117247	0.100953	-1.1614	0.24548	0.998927	ENSG00000051382.8	PIK3CB
1203.89	0.00451932	0.0736256	0.0613824	0.951055	0.998927	ENSG00000051523.11	CYBA
1537.92	0.0202513	0.065702	0.30823	0.757907	0.998927	ENSG00000051596.9	THOC3
550.49	0.0788379	0.103412	0.762364	0.445843	0.998927	ENSG00000051620.11	HEBP2
995.664	-0.0477947	0.0857814	-0.557168	0.577412	0.998927	ENSG00000051825.14	MPHOSPH9
92.2271	0.125306	0.270574	0.463113	0.643283	0.998927	ENSG00000052126.14	PLEKHA5
0.615874	0.626143	3.14115	0.199336	0.842	NA	ENSG00000052344.16	PRSS8
996.766	-0.0403989	0.0859	-0.470301	0.63814	0.998927	ENSG00000052723.11	SIKE1
1203.49	0.177477	0.0766644	2.31498	0.020614	0.357662	ENSG00000052749.13	RRP12
52.9842	0.0844277	0.375819	0.22465	0.822252	0.998927	ENSG00000052795.13	FNIP2
352.692	0.0909479	0.132434	0.686741	0.492246	0.998927	ENSG00000052802.13	MSMO1
731.753	0.06296	0.0911547	0.690694	0.489758	0.998927	ENSG00000052841.15	TTC17
42.386	-0.15262	0.374787	-0.407218	0.683848	0.998927	ENSG00000052850.7	ALX4
552.815	-0.188785	0.112104	-1.68402	0.0921777	0.767081	ENSG00000053254.15	FOXN3
578.051	-0.0761392	0.102338	-0.743998	0.456877	0.998927	ENSG00000053371.12	AKR7A2
2118.12	0.099022	0.0580396	1.70611	0.0879872	0.756625	ENSG00000053372.5	MRTO4
7.83067	0.769375	0.864614	0.889848	0.373548	NA	ENSG00000053438.10	NNAT
119.294	0.156037	0.223681	0.697588	0.485435	0.998927	ENSG00000053501.13	USE1
17.6168	0.0156291	0.571817	0.0273323	0.978195	NA	ENSG00000053524.12	MCF2L2
25.4308	-0.199292	0.473379	-0.421	0.673755	NA	ENSG00000053702.15	NRIP2
3.66558	-1.16755	1.25031	-0.933806	0.350404	NA	ENSG00000053747.16	LAMA3
437.907	-0.0566568	0.118353	-0.47871	0.632145	0.998927	ENSG00000053770.12	AP5M1
419.956	0.0322142	0.120063	0.268311	0.78846	0.998927	ENSG00000053900.10	ANAPC4
64.8077	-0.0140247	0.292217	-0.0479941	0.961721	0.998927	ENSG00000053918.16	KCNQ1
1129.67	-0.0100368	0.080263	-0.125049	0.900485	0.998927	ENSG00000054116.12	TRAPPC3
5401.1	-0.00333397	0.0410669	-0.0811837	0.935296	0.998927	ENSG00000054118.15	THRAP3
399.179	0.0683049	0.121018	0.564417	0.57247	0.998927	ENSG00000054148.17	PHPT1
891.203	0.00774019	0.0887018	0.0872607	0.930464	0.998927	ENSG00000054267.22	ARID4B
10.0175	0.552269	0.792648	0.69674	0.485965	NA	ENSG00000054277.14	OPN3
337.788	0.0596128	0.134366	0.443659	0.657289	0.998927	ENSG00000054282.16	SDCCAG8
0.404777	2.00898	3.90871	0.513975	0.60727	NA	ENSG00000054356.14	PTPRN
17.9441	-0.644024	0.585288	-1.10035	0.271178	NA	ENSG00000054392.13	HHAT
1469.59	-0.0904495	0.0678451	-1.33318	0.182474	0.963913	ENSG00000054523.17	KIF1B
163.593	0.242751	0.190167	1.27651	0.201774	0.992699	ENSG00000054598.8	FOXC1
141.143	0.00764878	0.218346	0.0350306	0.972055	0.998927	ENSG00000054611.14	TBC1D22A
1161.64	-0.287001	0.0751335	-3.81989	0.000133513	0.00847152	ENSG00000054654.16	SYNE2
60.4632	0.0706914	0.321665	0.219767	0.826052	0.998927	ENSG00000054690.13	PLEKHH1
110.033	-0.117359	0.243198	-0.482565	0.629405	0.998927	ENSG00000054793.13	ATP9A
759.171	-0.0168433	0.10235	-0.164566	0.869286	0.998927	ENSG00000054965.10	FAM168A
389.875	0.504026	0.123563	4.0791	4.52099e-05	0.00327842	ENSG00000054967.13	RELT
151.737	-0.159941	0.193914	-0.824801	0.409485	0.998927	ENSG00000054983.17	GALC
4828.41	0.1683	0.0523663	3.2139	0.00130946	0.0519999	ENSG00000055044.11	NOP58
3570.72	0.0514064	0.0473952	1.08463	0.278085	0.998927	ENSG00000055070.17	SZRD1
13.9222	0.106031	0.631373	0.167937	0.866633	NA	ENSG00000055118.14	KCNH2
3159.16	0.00911855	0.0489803	0.186168	0.852313	0.998927	ENSG00000055130.16	CUL1
248.613	0.0431414	0.152355	0.283163	0.777052	0.998927	ENSG00000055147.19	FAM114A2
12.9115	0.374012	0.690378	0.54175	0.587991	NA	ENSG00000055163.20	CYFIP2
1026.9	0.0294326	0.0813188	0.361941	0.717396	0.998927	ENSG00000055208.19	TAB2
729.841	-0.00929177	0.0933743	-0.099511	0.920733	0.998927	ENSG00000055211.14	GINM1
3181.85	-0.0974633	0.049692	-1.96135	0.0498384	0.587147	ENSG00000055332.18	EIF2AK2
1098.84	0.250491	0.0824522	3.03801	0.00238144	0.079328	ENSG00000055483.19	USP36
1230.97	-0.180792	0.0738432	-2.44833	0.0143521	0.29055	ENSG00000055609.18	KMT2C
16.7668	-0.159002	0.579692	-0.274287	0.783864	NA	ENSG00000055732.13	MCOLN3
2338.41	-0.0962055	0.0637548	-1.50899	0.1313	0.88742	ENSG00000055917.15	PUM2
504.347	0.0309372	0.114827	0.269424	0.787603	0.998927	ENSG00000055950.16	MRPL43
5.06508	0.215783	1.06498	0.202618	0.839434	NA	ENSG00000055955.16	ITIH4
301.105	0.200838	0.139419	1.44054	0.149715	0.924423	ENSG00000056050.7	HPF1
3554.24	0.00538827	0.0491624	0.109601	0.912725	0.998927	ENSG00000056097.16	ZFR
386.987	-0.0863586	0.126598	-0.682146	0.495147	0.998927	ENSG00000056277.16	ZNF280C
21.3317	0.510814	0.519855	0.982608	0.3258	NA	ENSG00000056487.16	PHF21B
49.0484	-0.0478897	0.338501	-0.141476	0.887494	0.998927	ENSG00000056558.11	TRAF1
1974.19	-0.0559614	0.0608717	-0.919335	0.357921	0.998927	ENSG00000056586.16	RC3H2
139.859	0.0302477	0.208842	0.144835	0.884841	0.998927	ENSG00000056736.10	IL17RB
107.888	-0.421457	0.243129	-1.73347	0.0830117	0.742807	ENSG00000056972.19	TRAF3IP2
1092.91	-0.0269392	0.0794152	-0.33922	0.734444	0.998927	ENSG00000057019.16	DCBLD2
2183.55	0.066004	0.0560023	1.17859	0.23856	0.998927	ENSG00000057252.13	SOAT1
205.077	-0.146292	0.184682	-0.792126	0.428287	0.998927	ENSG00000057294.14	PKP2
0.84065	1.24754	2.83564	0.439949	0.659974	NA	ENSG00000057468.7	MSH4
6597.22	0.0410348	0.0433825	0.945884	0.344208	0.998927	ENSG00000057608.17	GDI2
1.6726	0.41068	1.96709	0.208776	0.834623	NA	ENSG00000057657.17	PRDM1
758.901	0.0243366	0.0984081	0.247303	0.804674	0.998927	ENSG00000057663.16	ATG5
10.7479	-0.263131	0.734075	-0.358453	0.720005	NA	ENSG00000057704.13	TMCC3
646.089	0.332643	0.0980536	3.39246	0.000692669	0.0326085	ENSG00000057757.10	PITHD1
506.749	0.0224792	0.11691	0.192278	0.847524	0.998927	ENSG00000057935.13	MTA3
1163.35	-0.169345	0.0741074	-2.28513	0.0223053	0.375237	ENSG00000058056.9	USP13
1424.34	-0.0420416	0.0669504	-0.627951	0.530036	0.998927	ENSG00000058063.16	ATP11B
0.414731	-0.291598	3.91503	-0.0744818	0.940627	NA	ENSG00000058085.14	LAMC2
5452.89	0.0426229	0.0447785	0.951862	0.341167	0.998927	ENSG00000058262.10	SEC61A1
1277.36	-0.0270706	0.0724675	-0.373555	0.708736	0.998927	ENSG00000058272.19	PPP1R12A
2.75221	0.41365	1.62283	0.254894	0.798805	NA	ENSG00000058335.15	RASGRF1
71.9381	-0.0805592	0.279563	-0.288161	0.773224	0.998927	ENSG00000058404.20	CAMK2B
180.77	-0.00320957	0.186985	-0.0171648	0.986305	0.998927	ENSG00000058453.17	CROCC
271.705	0.018813	0.146043	0.128819	0.897501	0.998927	ENSG00000058600.16	POLR3E
2009.75	-0.0982184	0.070935	-1.38462	0.166167	0.94448	ENSG00000058668.14	ATP2B4
3001.37	0.0779693	0.0658325	1.18436	0.236271	0.998927	ENSG00000058673.16	ZC3H11A
949.992	0.0838889	0.0984115	0.85243	0.393976	0.998927	ENSG00000058729.11	RIOK2
257.989	0.0300665	0.151001	0.199115	0.842173	0.998927	ENSG00000058799.15	YIPF1
2842.24	-0.0310924	0.0532345	-0.584064	0.559177	0.998927	ENSG00000058804.12	NDC1
256.028	-0.0489091	0.173332	-0.28217	0.777813	0.998927	ENSG00000059122.16	FLYWCH1
132.363	0.281502	0.214505	1.31233	0.189407	0.974584	ENSG00000059145.18	UNKL
0.404777	2.00898	3.90871	0.513975	0.60727	NA	ENSG00000059377.17	TBXAS1
164.268	-0.00871133	0.197179	-0.0441798	0.964761	0.998927	ENSG00000059378.12	PARP12
2081.01	0.0693039	0.0580003	1.19489	0.232131	0.998927	ENSG00000059573.9	ALDH18A1
652.027	-0.062659	0.0970974	-0.645321	0.518719	0.998927	ENSG00000059588.10	TARBP1
243.497	-0.0125088	0.158022	-0.0791584	0.936907	0.998927	ENSG00000059691.12	GATB
338.1	1.00958	0.135815	7.43346	1.05793e-13	2.87239e-11	ENSG00000059728.11	MXD1
383.12	-0.269913	0.124589	-2.16643	0.0302784	0.442428	ENSG00000059758.8	CDK17
259.313	0.0327834	0.160691	0.204016	0.838341	0.998927	ENSG00000059769.20	DNAJC25
1207.26	0.254385	0.0743557	3.42119	0.000623482	0.0303298	ENSG00000059804.16	SLC2A3
3.85916	0.74036	1.22209	0.605814	0.544638	NA	ENSG00000059915.17	PSD
413.15	-0.0775816	0.126244	-0.614535	0.538862	0.998927	ENSG00000060069.16	CTDP1
3163.59	0.0911618	0.0538733	1.69215	0.0906172	0.763161	ENSG00000060138.13	YBX3
0.862758	3.08258	2.74433	1.12326	0.261329	NA	ENSG00000060140.9	STYK1
3355.42	-0.102347	0.0585705	-1.74742	0.0805648	0.734361	ENSG00000060237.17	WNK1
0.633768	2.64385	3.03896	0.869985	0.384309	NA	ENSG00000060303.5	RPS17P5
2774.92	-0.048725	0.0609377	-0.799587	0.42395	0.998927	ENSG00000060339.14	CCAR1
526.427	-0.0301195	0.107342	-0.280594	0.779022	0.998927	ENSG00000060491.16	OGFR
0.432625	2.0869	3.81929	0.546412	0.584783	NA	ENSG00000060558.3	GNA15
103.327	-0.0941953	0.233112	-0.404077	0.686156	0.998927	ENSG00000060642.10	PIGV
90.8707	-0.10908	0.257301	-0.42394	0.671609	0.998927	ENSG00000060656.20	PTPRU
1721.14	0.0631264	0.0644994	0.978712	0.327722	0.998927	ENSG00000060688.13	SNRNP40
3.72376	-1.1341	1.2504	-0.906994	0.36441	NA	ENSG00000060718.22	COL11A1
1631.84	-0.233153	0.0812945	-2.868	0.0041307	0.118783	ENSG00000060749.15	QSER1
114.801	-0.00463103	0.236326	-0.0195959	0.984366	0.998927	ENSG00000060762.19	MPC1
239.503	0.0370044	0.155028	0.238696	0.811342	0.998927	ENSG00000060971.18	ACAA1
57.6769	0.26687	0.315475	0.845931	0.397591	0.998927	ENSG00000060982.15	BCAT1
160.882	0.00159768	0.193133	0.00827242	0.9934	0.998927	ENSG00000061273.18	HDAC7
39.3905	-0.334346	0.376036	-0.889132	0.373932	0.998927	ENSG00000061337.15	LZTS1
10.7261	-0.0886545	0.822368	-0.107804	0.914151	NA	ENSG00000061455.11	PRDM6
16.0081	0.19531	0.60101	0.324969	0.745204	NA	ENSG00000061656.9	SPAG4
4221.94	-0.0214814	0.046307	-0.463891	0.642726	0.998927	ENSG00000061676.15	NCKAP1
2946.69	0.069534	0.0578911	1.20112	0.229705	0.998927	ENSG00000061794.13	MRPS35
703.728	-0.0488188	0.0953103	-0.512209	0.608504	0.998927	ENSG00000061936.9	SFSWAP
164.695	-0.0833176	0.191134	-0.435911	0.662901	0.998927	ENSG00000061938.18	TNK2
520.51	-0.10546	0.105854	-0.996274	0.319117	0.998927	ENSG00000061987.16	MON2
1.77633	-0.687581	1.80799	-0.380301	0.703722	NA	ENSG00000062038.14	CDH3
1827.14	-0.0118664	0.0636619	-0.186397	0.852134	0.998927	ENSG00000062194.16	GPBP1
185.497	-0.00745053	0.177809	-0.0419018	0.966577	0.998927	ENSG00000062282.15	DGAT2
67.2809	-0.878508	0.290096	-3.02833	0.00245909	0.080873	ENSG00000062370.16	ZNF112
2440.22	0.0851699	0.0555827	1.53231	0.125446	0.871851	ENSG00000062485.19	CS
1.44036	0.940207	2.22643	0.422294	0.672811	NA	ENSG00000062524.16	LTK
1048.63	0.02174	0.0779674	0.278835	0.780372	0.998927	ENSG00000062582.14	MRPS24
287.618	-0.0223449	0.144556	-0.154577	0.877155	0.998927	ENSG00000062598.18	ELMO2
2467.71	-0.0442613	0.0536956	-0.824301	0.409769	0.998927	ENSG00000062650.19	WAPL
3349.13	-0.018437	0.0518734	-0.355424	0.722272	0.998927	ENSG00000062716.13	VMP1
698.792	-0.0275552	0.107092	-0.257303	0.796945	0.998927	ENSG00000062725.10	APPBP2
472.709	-0.00630188	0.115982	-0.0543351	0.956668	0.998927	ENSG00000062822.13	POLD1
1.52351	-1.94789	2.04258	-0.95364	0.340266	NA	ENSG00000063015.19	SEZ6
6465.17	-0.0277621	0.0408351	-0.679858	0.496594	0.998927	ENSG00000063046.17	EIF4B
12.2043	-0.29486	0.682835	-0.431817	0.665874	NA	ENSG00000063127.15	SLC6A16
37.3942	-0.484497	0.403269	-1.20142	0.229587	0.998927	ENSG00000063169.10	BICRA
82.6363	-0.212159	0.273914	-0.774546	0.438608	0.998927	ENSG00000063176.15	SPHK2
10259	0.0948242	0.0412809	2.29705	0.0216161	0.367226	ENSG00000063177.13	RPL18
95.6915	-0.0780378	0.25329	-0.308096	0.758009	0.998927	ENSG00000063180.9	CA11
515.067	-0.00373168	0.108554	-0.0343763	0.972577	0.998927	ENSG00000063241.8	ISOC2
3564.83	0.0224637	0.0499425	0.449791	0.652861	0.998927	ENSG00000063244.12	U2AF2
556.613	-0.0471746	0.118871	-0.396854	0.691475	0.998927	ENSG00000063245.14	EPN1
552.198	0.0728851	0.107179	0.680034	0.496483	0.998927	ENSG00000063322.14	MED29
3.89735	-1.89636	1.46969	-1.29032	0.196941	NA	ENSG00000063438.17	AHRR
339.666	0.162309	0.135223	1.20031	0.23002	0.998927	ENSG00000063587.14	ZNF275
587.941	-0.0797644	0.11309	-0.70532	0.480611	0.998927	ENSG00000063601.17	MTMR1
415.418	-0.0527476	0.124087	-0.425086	0.670774	0.998927	ENSG00000063660.9	GPC1
70.4716	-0.149257	0.299943	-0.497617	0.618754	0.998927	ENSG00000063761.16	ADCK1
208.557	0.0442289	0.166812	0.265141	0.790901	0.998927	ENSG00000063854.13	HAGH
1419.5	-0.0225052	0.0674419	-0.333698	0.738607	0.998927	ENSG00000063978.16	RNF4
1391	-0.062329	0.0690189	-0.903071	0.366488	0.998927	ENSG00000064012.21	CASP8
7.65707	-0.456438	0.870956	-0.524066	0.600233	NA	ENSG00000064042.18	LIMCH1
2224.64	0.115098	0.0624944	1.84174	0.065513	0.667239	ENSG00000064102.15	INTS13
1020.62	-0.0594556	0.0793195	-0.749571	0.453513	0.998927	ENSG00000064115.11	TM7SF3
327.548	0.0037074	0.142413	0.0260327	0.979231	0.998927	ENSG00000064199.6	SPA17
4.37782	0.688119	1.16296	0.591698	0.554053	NA	ENSG00000064225.12	ST3GAL6
1.83471	-0.0405859	1.87741	-0.0216181	0.982753	NA	ENSG00000064270.12	ATP2C2
19.5913	0.152118	0.535112	0.284273	0.776201	NA	ENSG00000064300.9	NGFR
34.4727	0.257135	0.430049	0.597921	0.549893	0.998927	ENSG00000064309.14	CDON
1080.26	-0.00347557	0.0779264	-0.0446007	0.964426	0.998927	ENSG00000064313.12	TAF2
224.127	-0.184773	0.168967	-1.09355	0.274153	0.998927	ENSG00000064393.16	HIPK2
3183.98	-0.0100794	0.0500493	-0.201389	0.840395	0.998927	ENSG00000064419.13	TNPO3
50.3785	-0.0455756	0.33987	-0.134097	0.893326	0.998927	ENSG00000064489.22	BORCS8-MEF2B
306.604	-0.00718984	0.136735	-0.0525825	0.958065	0.998927	ENSG00000064490.14	RFXANK
192.233	-0.0215151	0.186401	-0.115424	0.908109	0.998927	ENSG00000064545.14	TMEM161A
26.5574	0.196794	0.48201	0.408277	0.68307	NA	ENSG00000064547.14	LPAR2
702.592	0.0815187	0.103289	0.78923	0.429978	0.998927	ENSG00000064601.18	CTSA
1806.1	-0.0799062	0.0682967	-1.16999	0.242007	0.998927	ENSG00000064607.17	SUGP2
482.571	-0.0561827	0.117382	-0.478631	0.632201	0.998927	ENSG00000064651.14	SLC12A2
218.082	0.115597	0.167892	0.688517	0.491127	0.998927	ENSG00000064652.11	SNX24
5.41731	1.37157	1.10856	1.23726	0.21599	NA	ENSG00000064655.19	EYA2
2010.93	-0.0667184	0.063429	-1.05186	0.292864	0.998927	ENSG00000064666.15	CNN2
63.301	0.0473884	0.314727	0.15057	0.880315	0.998927	ENSG00000064687.12	ABCA7
821.471	0.0200016	0.0938083	0.213218	0.831157	0.998927	ENSG00000064703.12	DDX20
1667.19	0.0112634	0.0666227	0.169063	0.865747	0.998927	ENSG00000064726.9	BTBD1
21.0455	-0.661414	0.524542	-1.26094	0.207332	NA	ENSG00000064763.11	FAR2
15.0536	0.208314	0.619631	0.336191	0.736727	NA	ENSG00000064787.13	BCAS1
3.55362	-0.387149	1.2278	-0.315318	0.75252	NA	ENSG00000064886.14	CHI3L2
341.164	0.0504051	0.141651	0.355839	0.721961	0.998927	ENSG00000064932.16	SBNO2
447.788	0.0449996	0.120088	0.374721	0.707868	0.998927	ENSG00000064933.17	PMS1
724.597	-0.014487	0.0964211	-0.150248	0.880569	0.998927	ENSG00000064961.19	HMG20B
527.957	0.160706	0.1112	1.4452	0.148402	0.923866	ENSG00000064995.17	TAF11
291.244	-0.00910247	0.151745	-0.0599853	0.952167	0.998927	ENSG00000064999.15	ANKS1A
1656.6	0.0345428	0.0692932	0.498502	0.61813	0.998927	ENSG00000065000.17	AP3D1
220.532	0.213861	0.165898	1.28911	0.197358	0.984683	ENSG00000065029.15	ZNF76
155.651	-0.0731498	0.196492	-0.372278	0.709686	0.998927	ENSG00000065054.14	SLC9A3R2
193.277	0.232318	0.171748	1.35267	0.176161	0.958825	ENSG00000065057.8	NTHL1
1136.34	-0.0973308	0.076488	-1.2725	0.203196	0.994682	ENSG00000065060.17	UHRF1BP1
3819.64	0.064631	0.0500901	1.29029	0.196949	0.984323	ENSG00000065135.11	GNAI3
5650.28	-0.0144704	0.0419176	-0.34521	0.729937	0.998927	ENSG00000065150.19	IPO5
3869.45	0.113002	0.051896	2.17747	0.0294459	0.436214	ENSG00000065154.11	OAT
2507.88	0.0591994	0.0544054	1.08812	0.276544	0.998927	ENSG00000065183.16	WDR3
2028.55	-0.0325086	0.0602031	-0.539981	0.58921	0.998927	ENSG00000065243.20	PKN2
489.522	-0.0763044	0.111776	-0.682652	0.494826	0.998927	ENSG00000065268.10	WDR18
786.996	0.0183614	0.09752	0.188283	0.850654	0.998927	ENSG00000065308.5	TRAM2
203.964	0.0921534	0.172991	0.532707	0.594237	0.998927	ENSG00000065320.9	NTN1
0.410517	-0.276517	3.9292	-0.070375	0.943895	NA	ENSG00000065325.13	GLP2R
1344.44	0.0125408	0.070475	0.177946	0.858765	0.998927	ENSG00000065328.16	MCM10
20.5291	0.101765	0.566035	0.179786	0.85732	NA	ENSG00000065357.20	DGKA
14.3906	-0.503236	0.618918	-0.81309	0.416167	NA	ENSG00000065361.15	ERBB3
77.7159	-0.262344	0.280215	-0.936221	0.349159	0.998927	ENSG00000065413.20	ANKRD44
7601.88	0.0612588	0.0429266	1.42706	0.153563	0.925643	ENSG00000065427.14	KARS
517.653	-0.00250364	0.107967	-0.0231888	0.9815	0.998927	ENSG00000065457.10	ADAT1
367.328	0.0498431	0.130217	0.38277	0.701891	0.998927	ENSG00000065485.20	PDIA5
206.292	0.00153708	0.16958	0.00906408	0.992768	0.998927	ENSG00000065491.8	TBC1D22B
1234.27	0.112252	0.0798645	1.40554	0.159862	0.937817	ENSG00000065518.8	NDUFB4
889.348	-0.0965449	0.084911	-1.13701	0.255533	0.998927	ENSG00000065526.11	SPEN
11.8787	0.169353	0.724579	0.233727	0.815197	NA	ENSG00000065534.18	MYLK
2998.22	0.106498	0.0676803	1.57355	0.115592	0.849296	ENSG00000065548.18	ZC3H15
941.073	-0.0183313	0.0843784	-0.217251	0.828013	0.998927	ENSG00000065559.15	MAP2K4
208.184	0.0788756	0.166048	0.475016	0.634775	0.998927	ENSG00000065600.12	TMEM206
4088.75	-0.0766215	0.045682	-1.67728	0.0934875	0.769857	ENSG00000065613.14	SLK
386.23	0.050194	0.138057	0.363576	0.716175	0.998927	ENSG00000065615.14	CYB5R4
350.649	-0.0212552	0.133417	-0.159313	0.873422	0.998927	ENSG00000065618.20	COL17A1
8.605	0.366227	0.812718	0.450621	0.652263	NA	ENSG00000065621.15	GSTO2
131.819	-0.0321213	0.209194	-0.153548	0.877966	0.998927	ENSG00000065665.21	SEC61A2
0.592044	-1.2673	3.35403	-0.377845	0.705545	NA	ENSG00000065675.14	PRKCQ
45.7728	0.0178047	0.347705	0.0512064	0.959161	0.998927	ENSG00000065717.15	TLE2
311.994	-0.170027	0.140743	-1.20807	0.227022	0.998927	ENSG00000065802.12	ASB1
172.826	0.068334	0.192041	0.355829	0.721969	0.998927	ENSG00000065809.13	FAM107B
312.442	0.147979	0.144992	1.0206	0.307442	0.998927	ENSG00000065833.9	ME1
309.338	-0.0347795	0.13856	-0.251007	0.801809	0.998927	ENSG00000065882.16	TBC1D1
768.52	-0.0592075	0.0895966	-0.660823	0.508726	0.998927	ENSG00000065883.16	CDK13
5615.17	0.180843	0.0475569	3.80266	0.00014315	0.00903396	ENSG00000065911.12	MTHFD2
543.603	-0.157599	0.108707	-1.44976	0.147126	0.923429	ENSG00000065923.10	SLC9A7
351.796	0.00800946	0.135498	0.0591113	0.952863	0.998927	ENSG00000065970.9	FOXJ2
19107.3	0.0569731	0.0304038	1.87388	0.0609468	0.646206	ENSG00000065978.19	YBX1
44.3824	-0.00447078	0.358341	-0.0124763	0.990046	0.998927	ENSG00000065989.16	AC011529.1
945.279	-0.08449	0.0896602	-0.942335	0.346021	0.998927	ENSG00000066027.12	PPP2R5A
1794.59	-0.00297322	0.0681878	-0.0436034	0.965221	0.998927	ENSG00000066044.15	ELAVL1
0.593009	0.566855	3.46004	0.163829	0.869866	NA	ENSG00000066056.14	TIE1
626.473	-0.0292629	0.106756	-0.27411	0.784	0.998927	ENSG00000066084.13	DIP2B
1205.05	0.0123954	0.0789014	0.1571	0.875166	0.998927	ENSG00000066117.14	SMARCD1
603.563	0.072209	0.101121	0.714086	0.475174	0.998927	ENSG00000066135.13	KDM4A
485.347	-0.0866715	0.110469	-0.78458	0.4327	0.998927	ENSG00000066136.20	NFYC
14.9668	0.127976	0.675279	0.189516	0.849688	NA	ENSG00000066185.13	ZMYND12
85.9555	-0.0230777	0.259968	-0.0887712	0.929264	0.998927	ENSG00000066230.11	SLC9A3
90.938	-0.261018	0.247673	-1.05388	0.291937	0.998927	ENSG00000066248.15	NGEF
3728.17	-0.198953	0.0459056	-4.33396	1.46451e-05	0.00123661	ENSG00000066279.18	ASPM
1246.05	0.0397078	0.0727731	0.545638	0.585315	0.998927	ENSG00000066322.15	ELOVL1
0.414731	-0.291598	3.91503	-0.0744818	0.940627	NA	ENSG00000066336.11	SPI1
317.974	0.0836293	0.139682	0.598714	0.549363	0.998927	ENSG00000066379.15	ZNRD1
897.18	0.235103	0.0847386	2.77445	0.00552951	0.145727	ENSG00000066422.4	ZBTB11
246.406	0.104377	0.154262	0.67662	0.498647	0.998927	ENSG00000066427.22	ATXN3
720.565	0.00722577	0.0947003	0.0763015	0.939179	0.998927	ENSG00000066455.13	GOLGA5
22.6357	0.0579929	0.509596	0.113802	0.909395	NA	ENSG00000066468.22	FGFR2
883.621	0.0476196	0.0920959	0.517065	0.605111	0.998927	ENSG00000066557.6	LRRC40
198.116	-0.111387	0.177658	-0.626974	0.530676	0.998927	ENSG00000066583.12	ISOC1
132.562	-0.251384	0.216559	-1.16081	0.245717	0.998927	ENSG00000066629.17	EML1
387.369	-0.0354348	0.136378	-0.259828	0.794997	0.998927	ENSG00000066651.20	TRMT11
1058.86	0.103069	0.0765676	1.34612	0.178263	0.960321	ENSG00000066654.14	THUMPD1
418.423	-0.0141657	0.123246	-0.114938	0.908494	0.998927	ENSG00000066697.14	MSANTD3
161.289	-0.230298	0.197384	-1.16675	0.243311	0.998927	ENSG00000066735.14	KIF26A
493.447	-0.101819	0.109973	-0.925857	0.35452	0.998927	ENSG00000066739.12	ATG2B
584.759	-0.0931046	0.118663	-0.784615	0.43268	0.998927	ENSG00000066777.9	ARFGEF1
56.4213	0.47008	0.337598	1.39243	0.163794	0.944243	ENSG00000066827.16	ZFAT
861.407	0.0705738	0.089319	0.790133	0.42945	0.998927	ENSG00000066855.16	MTFR1
28.1272	-0.152104	0.483646	-0.314495	0.753145	NA	ENSG00000066923.17	STAG3
703.368	-0.0342981	0.0935608	-0.366586	0.713928	0.998927	ENSG00000066926.11	FECH
564.425	-0.240764	0.108639	-2.21618	0.026679	0.410378	ENSG00000066933.16	MYO9A
1758.99	-0.0112247	0.0653677	-0.171716	0.863661	0.998927	ENSG00000067057.17	PFKP
941.98	0.3927	0.0863077	4.54999	5.36472e-06	0.000485528	ENSG00000067064.11	IDI1
414.161	0.143254	0.127384	1.12459	0.260764	0.998927	ENSG00000067066.17	SP100
2557.79	0.398873	0.0550463	7.24614	4.28828e-13	1.11257e-10	ENSG00000067082.15	KLF6
266.079	-0.183964	0.149226	-1.23278	0.217656	0.998927	ENSG00000067113.17	PLPP1
92.1814	-0.192665	0.259878	-0.741369	0.45847	0.998927	ENSG00000067141.17	NEO1
1546.7	-0.0543209	0.0674001	-0.805947	0.420273	0.998927	ENSG00000067167.8	TRAM1
392.993	-0.109366	0.125199	-0.873539	0.382369	0.998927	ENSG00000067177.15	PHKA1
819.866	-0.182189	0.0963547	-1.89082	0.0586487	0.637006	ENSG00000067182.7	TNFRSF1A
62.8251	-0.125938	0.304048	-0.414204	0.678725	0.998927	ENSG00000067191.16	CACNB1
337.33	-0.0508962	0.138108	-0.368526	0.712481	0.998927	ENSG00000067208.14	EVI5
45.366	-0.199745	0.35885	-0.556624	0.577784	0.998927	ENSG00000067221.14	STOML1
18622.6	0.0105169	0.0390819	0.2691	0.787853	0.998927	ENSG00000067225.18	PKM
1860.26	-0.0346661	0.0641986	-0.539982	0.589209	0.998927	ENSG00000067248.10	DHX29
6176.32	0.273533	0.0543519	5.03263	4.83789e-07	5.37927e-05	ENSG00000067334.14	DNTTIP2
148.206	0.0797857	0.205775	0.387733	0.698214	0.998927	ENSG00000067365.14	METTL22
1101.8	-0.0757529	0.0793214	-0.955012	0.339572	0.998927	ENSG00000067369.13	TP53BP1
0.862758	3.08258	2.74433	1.12326	0.261329	NA	ENSG00000067445.20	TRO
1014.67	-0.0744577	0.0796912	-0.934328	0.350135	0.998927	ENSG00000067533.6	RRP15
6821.92	0.0595598	0.0456398	1.305	0.191894	0.976617	ENSG00000067560.11	RHOA
1439.73	-0.0636941	0.0678666	-0.938518	0.347978	0.998927	ENSG00000067596.11	DHX8
50.6977	-0.100976	0.334959	-0.301457	0.763066	0.998927	ENSG00000067601.8	PMS2P4
171.199	0.128983	0.185884	0.693889	0.487752	0.998927	ENSG00000067606.17	PRKCZ
3828.27	-0.017553	0.0515587	-0.340447	0.73352	0.998927	ENSG00000067704.10	IARS2
1083.06	0.0623281	0.0763072	0.816805	0.41404	0.998927	ENSG00000067715.14	SYT1
467.424	0.115044	0.113226	1.01606	0.309602	0.998927	ENSG00000067829.19	IDH3G
90.3198	0.0699276	0.250029	0.279678	0.779725	0.998927	ENSG00000067836.12	ROGDI
179.207	-0.0768632	0.180728	-0.425297	0.67062	0.998927	ENSG00000067840.12	PDZD4
1888.86	-0.0426277	0.0616328	-0.691639	0.489164	0.998927	ENSG00000067900.8	ROCK1
2903.15	-0.0202654	0.0519438	-0.390142	0.696432	0.998927	ENSG00000067955.14	CBFB
430.216	-0.0150202	0.12784	-0.117492	0.90647	0.998927	ENSG00000067992.14	PDK3
397.023	0.0433245	0.131117	0.330425	0.741079	0.998927	ENSG00000068001.14	HYAL2
242.975	0.0720667	0.162443	0.443644	0.6573	0.998927	ENSG00000068024.16	HDAC4
229.676	0.341409	0.160716	2.1243	0.0336453	0.478434	ENSG00000068028.17	RASSF1
178.468	0.0619438	0.178604	0.346821	0.728726	0.998927	ENSG00000068078.18	FGFR3
86.2419	-0.00280011	0.260372	-0.0107543	0.991419	0.998927	ENSG00000068079.7	IFI35
241.776	-0.207013	0.161994	-1.2779	0.201283	0.991552	ENSG00000068097.14	HEATR6
601.413	-0.0139127	0.102902	-0.135203	0.892451	0.998927	ENSG00000068120.15	COASY
99.6909	-0.275377	0.247701	-1.11173	0.266253	0.998927	ENSG00000068137.15	PLEKHH3
385.939	0.0850993	0.126553	0.672443	0.501302	0.998927	ENSG00000068305.17	MEF2A
849.369	0.0422636	0.0851753	0.496195	0.619757	0.998927	ENSG00000068308.13	OTUD5
503.721	0.08817	0.108538	0.812345	0.416594	0.998927	ENSG00000068323.17	TFE3
128.129	-0.0179983	0.216262	-0.0832243	0.933673	0.998927	ENSG00000068354.16	TBC1D25
297.104	0.0207685	0.139967	0.148382	0.882042	0.998927	ENSG00000068366.19	ACSL4
365.512	0.0620901	0.126401	0.491215	0.623274	0.998927	ENSG00000068383.19	INPP5A
460.568	0.0131125	0.11399	0.115032	0.908419	0.998927	ENSG00000068394.11	GPKOW
396.377	0.0136012	0.13244	0.102697	0.918203	0.998927	ENSG00000068400.13	GRIPAP1
594.885	0.102153	0.100838	1.01304	0.311042	0.998927	ENSG00000068438.15	FTSJ1
1658.34	-0.0635995	0.0644338	-0.987052	0.323617	0.998927	ENSG00000068489.12	PRR11
8.94674	-0.536195	0.818239	-0.655304	0.512272	NA	ENSG00000068615.18	REEP1
320.483	-0.0769456	0.138911	-0.553921	0.579633	0.998927	ENSG00000068650.18	ATP11A
1534.29	0.0621087	0.0690384	0.899625	0.36832	0.998927	ENSG00000068654.16	POLR1A
2015.51	0.0627796	0.069278	0.906198	0.364831	0.998927	ENSG00000068697.7	LAPTM4A
272.427	0.237887	0.147839	1.60909	0.107596	0.815888	ENSG00000068724.16	TTC7A
653.052	0.324934	0.0993566	3.27039	0.00107401	0.0454313	ENSG00000068745.15	IP6K2
527.066	-0.0239215	0.105614	-0.226499	0.820814	0.998927	ENSG00000068784.13	SRBD1
1325.77	-0.0754235	0.073077	-1.03211	0.30202	0.998927	ENSG00000068796.16	KIF2A
2.96779	0.588335	1.4012	0.41988	0.674573	NA	ENSG00000068831.19	RASGRP2
3089.13	-0.00353292	0.0538255	-0.0656365	0.947667	0.998927	ENSG00000068878.15	PSME4
365.41	-0.0620618	0.127846	-0.485442	0.627363	0.998927	ENSG00000068885.15	IFT80
367.732	0.139397	0.125474	1.11096	0.266584	0.998927	ENSG00000068903.20	SIRT2
680.316	-0.0567988	0.0938677	-0.605094	0.545117	0.998927	ENSG00000068912.14	ERLEC1
43.1049	0.284493	0.361932	0.78604	0.431844	0.998927	ENSG00000068971.14	PPP2R5B
3.87257	0.735312	1.222	0.601726	0.547357	NA	ENSG00000068976.14	PYGM
310.299	-0.0577642	0.136323	-0.423731	0.671762	0.998927	ENSG00000069011.16	PITX1
0.389375	-0.29182	4.00472	-0.072869	0.94191	NA	ENSG00000069018.18	TRPC7
0.822	1.19815	2.85068	0.420302	0.674265	NA	ENSG00000069020.18	MAST4
0.795678	-0.348299	2.77337	-0.125587	0.900059	NA	ENSG00000069188.17	SDK2
1800.54	-0.0453577	0.0658311	-0.689002	0.490822	0.998927	ENSG00000069248.12	NUP133
13109.5	-0.0699302	0.0341015	-2.05065	0.0403012	0.529861	ENSG00000069275.13	NUCKS1
5685.43	0.0216799	0.0442	0.490494	0.623784	0.998927	ENSG00000069329.17	VPS35
2983.37	0.0777223	0.0500453	1.55304	0.120413	0.859771	ENSG00000069345.12	DNAJA2
37.8129	-0.191433	0.427079	-0.448237	0.653982	0.998927	ENSG00000069399.15	BCL3
90.0144	0.0894041	0.264528	0.337976	0.735381	0.998927	ENSG00000069424.14	KCNAB2
689.179	0.164543	0.0987084	1.66696	0.095523	0.770803	ENSG00000069482.7	GAL
20.0828	-0.223676	0.53508	-0.418024	0.67593	NA	ENSG00000069493.15	CLEC2D
5.3113	-0.496606	1.00508	-0.494098	0.621237	NA	ENSG00000069667.16	RORA
3.49889	-0.11474	1.4056	-0.0816306	0.93494	NA	ENSG00000069696.6	DRD4
169.876	-0.201215	0.19314	-1.04181	0.2975	0.998927	ENSG00000069702.11	TGFBR3
0.760856	-1.88036	3.04561	-0.6174	0.536971	NA	ENSG00000069764.9	PLA2G10
34.109	0.271536	0.407425	0.666468	0.505112	0.998927	ENSG00000069812.11	HES2
2839.9	0.137292	0.0593362	2.3138	0.0206785	0.357662	ENSG00000069849.11	ATP1B3
966.965	0.003001	0.0853003	0.0351816	0.971935	0.998927	ENSG00000069869.16	NEDD4
136.219	0.141378	0.227632	0.62108	0.534547	0.998927	ENSG00000069943.10	PIGB
1778.85	0.190571	0.0691587	2.75557	0.00585903	0.151337	ENSG00000069956.12	MAPK6
225.515	-0.0240466	0.15899	-0.151246	0.879781	0.998927	ENSG00000069966.18	GNB5
202.547	-0.0675898	0.169235	-0.399383	0.689611	0.998927	ENSG00000069974.16	RAB27A
703.258	-0.00643892	0.103165	-0.0624141	0.950233	0.998927	ENSG00000069998.12	HDHD5
1388.34	0.15139	0.0753995	2.00784	0.0446604	0.555772	ENSG00000070010.19	UFD1
1067.58	-0.291578	0.0875527	-3.33032	0.000867472	0.0389528	ENSG00000070018.9	LRP6
14.7782	-0.274991	0.624371	-0.440429	0.659626	NA	ENSG00000070019.5	GUCY2C
0.570901	-1.28118	3.09655	-0.413743	0.679063	NA	ENSG00000070031.4	SCT
525.548	-0.0679791	0.11154	-0.609458	0.542221	0.998927	ENSG00000070047.12	PHRF1
1488.74	-0.0359474	0.069363	-0.51825	0.604284	0.998927	ENSG00000070061.15	ELP1
3183.62	0.0617159	0.059474	1.0377	0.299412	0.998927	ENSG00000070081.16	NUCB2
3747.63	-0.0119265	0.045789	-0.260468	0.794503	0.998927	ENSG00000070087.14	PFN2
433.272	-0.0233671	0.11579	-0.201806	0.840069	0.998927	ENSG00000070159.14	PTPN3
2.06895	0.882264	1.79775	0.490761	0.623596	NA	ENSG00000070182.20	SPTB
395.378	-0.121381	0.122609	-0.989984	0.322182	0.998927	ENSG00000070214.16	SLC44A1
110.673	0.0290219	0.230496	0.125911	0.899802	0.998927	ENSG00000070269.14	TMEM260
440.717	0.0468629	0.120272	0.389641	0.696802	0.998927	ENSG00000070366.14	SMG6
1552.98	-0.0929627	0.0654276	-1.42085	0.155361	0.928268	ENSG00000070367.16	EXOC5
86.3877	-0.0754632	0.26076	-0.289397	0.772278	0.998927	ENSG00000070371.16	CLTCL1
4.57925	-0.0108523	1.08507	-0.0100015	0.99202	NA	ENSG00000070388.11	FGF22
57.7921	0.109591	0.33086	0.33123	0.740471	0.998927	ENSG00000070404.10	FSTL3
570.012	-0.176942	0.114155	-1.55002	0.121136	0.86151	ENSG00000070413.20	DGCR2
506.535	-0.0260329	0.116186	-0.224063	0.822708	0.998927	ENSG00000070423.18	RNF126
286.705	0.310262	0.165762	1.87174	0.0612432	0.648245	ENSG00000070444.15	MNT
224.888	-0.123869	0.162014	-0.76456	0.444534	0.998927	ENSG00000070476.15	ZXDC
595.803	0.208201	0.101838	2.04443	0.0409107	0.533072	ENSG00000070495.14	JMJD6
321.696	0.0763916	0.134702	0.567115	0.570636	0.998927	ENSG00000070501.12	POLB
81.5771	-0.0201231	0.266518	-0.0755038	0.939814	0.998927	ENSG00000070540.13	WIPI1
0.404777	2.00898	3.90871	0.513975	0.60727	NA	ENSG00000070601.10	FRMPD1
252.962	-0.0483691	0.150672	-0.321022	0.748194	0.998927	ENSG00000070610.14	GBA2
1405.3	-0.0997033	0.0694162	-1.43631	0.150913	0.925442	ENSG00000070614.15	NDST1
991.004	0.291446	0.0810685	3.59506	0.00032432	0.0176113	ENSG00000070669.17	ASNS
635.279	-0.0198659	0.101358	-0.195998	0.844612	0.998927	ENSG00000070718.12	AP3M2
13.6309	0.145636	0.667294	0.218248	0.827236	NA	ENSG00000070731.10	ST6GALNAC2
14934.4	0.0214402	0.0341841	0.627199	0.530529	0.998927	ENSG00000070756.16	PABPC1
10.8194	0.050808	0.723847	0.0701917	0.944041	NA	ENSG00000070759.17	TESK2
879.306	0.178547	0.0834221	2.14029	0.0323315	0.463153	ENSG00000070761.8	CFAP20
2177.56	0.0159217	0.0646736	0.246186	0.805538	0.998927	ENSG00000070770.9	CSNK2A2
45.8483	0.0189723	0.361851	0.0524314	0.958185	0.998927	ENSG00000070778.13	AL162171.1
902.867	0.106565	0.0829262	1.28506	0.19877	0.986892	ENSG00000070785.16	EIF2B3
5.24727	1.02204	1.16651	0.876152	0.380947	NA	ENSG00000070808.15	CAMK2A
2452.63	0.00275261	0.06137	0.0448527	0.964225	0.998927	ENSG00000070814.19	TCOF1
5041.84	0.0879181	0.0479385	1.83398	0.0666577	0.671772	ENSG00000070831.16	CDC42
1976.35	-0.0348905	0.0607236	-0.574578	0.565577	0.998927	ENSG00000070882.13	OSBPL3
15.6034	-0.212342	0.60224	-0.352587	0.724398	NA	ENSG00000070886.12	EPHA8
786.869	0.0354366	0.0940668	0.376718	0.706383	0.998927	ENSG00000070950.10	RAD18
189.282	-0.244387	0.172458	-1.41708	0.156459	0.930156	ENSG00000070961.15	ATP2B1
242.636	0.0292873	0.160531	0.182441	0.855237	0.998927	ENSG00000071051.14	NCK2
2020.14	-0.0349241	0.0598057	-0.58396	0.559247	0.998927	ENSG00000071054.16	MAP4K4
23.9567	0.245165	0.4827	0.507903	0.611521	NA	ENSG00000071073.13	MGAT4A
10056.1	0.110538	0.0472428	2.33979	0.0192948	0.344973	ENSG00000071082.11	RPL31
3571.63	0.0109943	0.0469464	0.234189	0.814838	0.998927	ENSG00000071127.17	WDR1
1093.02	-0.0199954	0.0769316	-0.259911	0.794932	0.998927	ENSG00000071189.21	SNX13
158.905	-0.0445371	0.200922	-0.221664	0.824576	0.998927	ENSG00000071205.11	ARHGAP10
1.23003	0.635957	2.07872	0.305937	0.759653	NA	ENSG00000071242.12	RPS6KA2
297.242	0.203784	0.149071	1.36703	0.171617	0.953608	ENSG00000071243.16	ING3
76.4253	-0.19655	0.291154	-0.675072	0.49963	0.998927	ENSG00000071246.11	VASH1
20.7827	-0.962065	0.529379	-1.81735	0.0691639	NA	ENSG00000071282.12	LMCD1
2418.91	0.0835889	0.0550404	1.51868	0.128843	0.883425	ENSG00000071462.11	BUD23
712.696	-0.155911	0.0980661	-1.58985	0.111868	0.832948	ENSG00000071537.14	SEL1L
2086.94	0.0395545	0.0638958	0.619046	0.535886	0.998927	ENSG00000071539.14	TRIP13
589.264	9.15345e-05	0.104917	0.000872445	0.999304	0.999958	ENSG00000071553.17	ATP6AP1
1368.93	0.0596407	0.0727322	0.820004	0.412214	0.998927	ENSG00000071564.15	TCF3
854.061	-0.299955	0.0852212	-3.51972	0.000431995	0.0229252	ENSG00000071575.11	TRIB2
2122.68	0.0321994	0.0614968	0.523595	0.60056	0.998927	ENSG00000071626.16	DAZAP1
871.422	-0.00426061	0.0873879	-0.0487552	0.961114	0.998927	ENSG00000071655.18	MBD3
2453.1	-0.108914	0.060492	-1.80047	0.0717872	0.698053	ENSG00000071794.16	HLTF
739.621	-0.0294317	0.0927481	-0.31733	0.750993	0.998927	ENSG00000071859.15	FAM50A
266.259	0.148599	0.153265	0.969557	0.332267	0.998927	ENSG00000071889.16	FAM3A
883.937	-0.00552284	0.0966571	-0.0571386	0.954435	0.998927	ENSG00000071894.17	CPSF1
1258.79	-0.0171187	0.0731444	-0.23404	0.814954	0.998927	ENSG00000071967.12	CYBRD1
0.797401	-0.36837	2.5757	-0.143017	0.886277	NA	ENSG00000071991.8	CDH19
1497.11	0.0171825	0.0733176	0.234357	0.814708	0.998927	ENSG00000071994.10	PDCD2
1315.52	0.0421709	0.0719138	0.58641	0.5576	0.998927	ENSG00000072042.13	RDH11
739.269	-0.0532379	0.0912756	-0.583265	0.559715	0.998927	ENSG00000072062.13	PRKACA
722.543	0.00836023	0.102201	0.0818017	0.934804	0.998927	ENSG00000072071.16	ADGRL1
2170.9	-0.0284782	0.0656725	-0.43364	0.66455	0.998927	ENSG00000072110.13	ACTN1
285.644	-0.161964	0.14663	-1.10458	0.269343	0.998927	ENSG00000072121.16	ZFYVE26
369.764	0.0814422	0.13007	0.626141	0.531223	0.998927	ENSG00000072134.15	EPN2
382.243	-0.00642207	0.136195	-0.0471536	0.962391	0.998927	ENSG00000072135.13	PTPN18
21.8101	0.333886	0.522954	0.638462	0.523173	NA	ENSG00000072163.19	LIMS2
5.95204	-0.000124853	0.959442	-0.000130131	0.999896	NA	ENSG00000072182.12	ASIC4
16.3806	0.476847	0.601653	0.792562	0.428033	NA	ENSG00000072195.15	SPEG
5.05244	0.222993	1.08037	0.206405	0.836475	NA	ENSG00000072201.13	LNX1
962.732	0.101433	0.0839016	1.20895	0.226681	0.998927	ENSG00000072210.18	ALDH3A2
12647.1	0.177637	0.034017	5.22202	1.76984e-07	2.15238e-05	ENSG00000072274.13	TFRC
751.564	0.0411384	0.110964	0.370737	0.710833	0.998927	ENSG00000072310.16	SREBF1
2964.89	-0.0366401	0.059815	-0.612557	0.54017	0.998927	ENSG00000072364.13	AFF4
335.101	0.0533035	0.143184	0.372274	0.709689	0.998927	ENSG00000072401.15	UBE2D1
684.43	-0.02951	0.0985724	-0.299374	0.764655	0.998927	ENSG00000072415.8	MPP5
1866.2	0.0248423	0.0661156	0.37574	0.70711	0.998927	ENSG00000072501.17	SMC1A
632.83	0.0586391	0.0985867	0.594797	0.551979	0.998927	ENSG00000072506.12	HSD17B10
404.14	0.0694766	0.145015	0.479101	0.631867	0.998927	ENSG00000072518.20	MARK2
3610.89	-0.00694222	0.0585541	-0.118561	0.905623	0.998927	ENSG00000072571.20	HMMR
442.251	-0.00750984	0.116985	-0.0641946	0.948815	0.998927	ENSG00000072609.17	CHFR
0.404777	2.00898	3.90871	0.513975	0.60727	NA	ENSG00000072657.8	TRHDE
428.411	-0.0568279	0.119586	-0.475204	0.634642	0.998927	ENSG00000072682.18	P4HA2
1421.26	-0.113717	0.0698007	-1.62917	0.103278	0.797993	ENSG00000072736.19	NFATC3
336.286	-0.11727	0.137574	-0.852415	0.393984	0.998927	ENSG00000072756.17	TRNT1
2199.92	0.036381	0.0583118	0.623904	0.532691	0.998927	ENSG00000072778.20	ACADVL
228.678	0.077643	0.161533	0.480664	0.630755	0.998927	ENSG00000072786.13	STK10
1523.75	-0.0733044	0.0675691	-1.08488	0.277974	0.998927	ENSG00000072803.17	FBXW11
11.8724	0.369336	0.687787	0.536993	0.591273	NA	ENSG00000072818.12	ACAP1
749.869	0.00984722	0.0898553	0.10959	0.912735	0.998927	ENSG00000072849.11	DERL2
728.235	-0.0286441	0.0924747	-0.309751	0.756751	0.998927	ENSG00000072864.15	NDE1
76.8432	0.178742	0.275683	0.64836	0.516752	0.998927	ENSG00000072954.7	TMEM38A
876.629	-0.0122701	0.089542	-0.137032	0.891005	0.998927	ENSG00000072958.8	AP1M1
824.652	0.143368	0.0984224	1.45666	0.14521	0.919518	ENSG00000073008.15	PVR
295.408	-0.0761427	0.142484	-0.534394	0.593069	0.998927	ENSG00000073050.11	XRCC1
939.438	0.0068827	0.103173	0.06671	0.946813	0.998927	ENSG00000073060.16	SCARB1
3.05803	0.223391	1.38968	0.160749	0.872291	NA	ENSG00000073067.14	CYP2W1
4121.55	0.048351	0.0512426	0.943571	0.345389	0.998927	ENSG00000073111.14	MCM2
86.5597	0.202855	0.256022	0.792337	0.428164	0.998927	ENSG00000073150.13	PANX2
187.153	-0.0289964	0.186024	-0.155875	0.876132	0.998927	ENSG00000073169.14	SELENOO
670.455	-0.0812668	0.097546	-0.833112	0.404781	0.998927	ENSG00000073282.13	TP63
33.5539	0.0396064	0.409076	0.0968193	0.92287	0.998927	ENSG00000073331.18	ALPK1
66.9064	-0.200214	0.293222	-0.682806	0.49473	0.998927	ENSG00000073350.13	LLGL2
773.181	-0.0532447	0.0908377	-0.586152	0.557774	0.998927	ENSG00000073417.15	PDE8A
17.7476	-0.026251	0.562829	-0.0466412	0.962799	NA	ENSG00000073464.12	CLCN4
548.059	0.0282592	0.110202	0.256432	0.797618	0.998927	ENSG00000073536.18	NLE1
1804.98	0.0661551	0.0610654	1.08335	0.278654	0.998927	ENSG00000073578.17	SDHA
2330.86	-0.0170629	0.0561232	-0.304027	0.761108	0.998927	ENSG00000073584.20	SMARCE1
1.96848	0.788185	1.81067	0.435301	0.663344	NA	ENSG00000073598.6	FNDC8
50.3019	-0.0129134	0.346086	-0.0373126	0.970236	0.998927	ENSG00000073605.18	GSDMB
2348.37	-0.045226	0.0552902	-0.817975	0.413372	0.998927	ENSG00000073614.12	KDM5A
92.061	0.149694	0.2613	0.572881	0.566725	0.998927	ENSG00000073670.14	ADAM11
101.824	0.0967783	0.236257	0.409631	0.682076	0.998927	ENSG00000073711.11	PPP2R3A
714.523	0.0298328	0.093995	0.317387	0.75095	0.998927	ENSG00000073712.15	FERMT2
0.575116	-1.29503	3.3892	-0.382106	0.702383	NA	ENSG00000073734.9	ABCB11
1609.17	0.0112531	0.0652927	0.172349	0.863163	0.998927	ENSG00000073792.15	IGF2BP2
400.349	0.0313695	0.135193	0.232036	0.81651	0.998927	ENSG00000073803.14	MAP3K13
36.0783	-0.373186	0.393055	-0.949451	0.342391	0.998927	ENSG00000073849.15	ST6GAL1
1.57615	-0.398712	1.82608	-0.218343	0.827162	NA	ENSG00000073861.3	TBX21
11.4946	-0.359513	0.732378	-0.490885	0.623508	NA	ENSG00000073905.8	VDAC1P1
1.40485	0.0623613	2.20238	0.0283154	0.977411	NA	ENSG00000073910.21	FRY
2181.98	-0.0611795	0.0566385	-1.08017	0.280064	0.998927	ENSG00000073921.18	PICALM
1574.08	-0.0506598	0.0700493	-0.723202	0.469556	0.998927	ENSG00000073969.18	NSF
27.6653	0.128067	0.459376	0.278785	0.78041	NA	ENSG00000074047.21	GLI2
1114.02	-0.0589401	0.0765927	-0.769527	0.441581	0.998927	ENSG00000074054.18	CLASP1
650.368	0.0864986	0.095878	0.902173	0.366965	0.998927	ENSG00000074071.14	MRPS34
102.26	-0.142864	0.235867	-0.605696	0.544717	0.998927	ENSG00000074181.9	NOTCH3
2749.7	0.0881499	0.0609001	1.44745	0.147771	0.923493	ENSG00000074201.8	CLNS1A
36.5263	-0.13493	0.389301	-0.346594	0.728896	0.998927	ENSG00000074211.14	PPP2R2C
198.435	0.0443101	0.172706	0.256563	0.797516	0.998927	ENSG00000074219.13	TEAD2
672.327	0.0191957	0.0982892	0.195298	0.84516	0.998927	ENSG00000074266.20	EED
4.7493	0.323539	1.1161	0.289884	0.771905	NA	ENSG00000074276.10	CDHR2
7.517	-0.237734	0.846987	-0.280683	0.778954	NA	ENSG00000074317.11	SNCB
716.281	0.0932707	0.0964172	0.967366	0.333361	0.998927	ENSG00000074319.13	TSG101
1416.92	0.000823849	0.072943	0.0112944	0.990989	0.998927	ENSG00000074356.17	NCBP3
1.24792	1.95127	2.3495	0.830504	0.406254	NA	ENSG00000074370.18	ATP2A3
14.898	-0.188857	0.610948	-0.309121	0.75723	NA	ENSG00000074410.14	CA12
4.39525	0.407885	1.188	0.343338	0.731344	NA	ENSG00000074416.14	MGLL
0.633768	2.64385	3.03896	0.869985	0.384309	NA	ENSG00000074527.12	NTN4
495.387	-0.0298059	0.110844	-0.268901	0.788006	0.998927	ENSG00000074582.14	BCS1L
116.998	-0.31647	0.219667	-1.44068	0.149675	0.924423	ENSG00000074590.13	NUAK1
614.835	-0.11024	0.107194	-1.02841	0.303756	0.998927	ENSG00000074603.19	DPP8
57.0614	-0.430209	0.319572	-1.34621	0.178236	0.960321	ENSG00000074621.14	SLC24A1
180.2	-0.117346	0.178007	-0.659224	0.509752	0.998927	ENSG00000074657.13	ZNF532
8.07958	0.664612	0.866172	0.767298	0.442904	NA	ENSG00000074660.16	SCARF1
5156.08	-0.0026197	0.0433015	-0.060499	0.951758	0.998927	ENSG00000074695.6	LMAN1
4011.51	0.0106775	0.0457298	0.233491	0.81538	0.998927	ENSG00000074696.13	HACD3
682.853	0.0158239	0.0959084	0.16499	0.868952	0.998927	ENSG00000074755.15	ZZEF1
1.52447	-1.15334	1.93719	-0.595367	0.551598	NA	ENSG00000074771.3	NOX3
32267.9	0.0561735	0.0295686	1.89977	0.0574639	0.633514	ENSG00000074800.15	ENO1
832.296	0.0454166	0.0887229	0.511893	0.608726	0.998927	ENSG00000074842.7	MYDGF
38.4503	-0.155148	0.392179	-0.395606	0.692396	0.998927	ENSG00000074855.11	ANO8
158.402	0.205879	0.190302	1.08185	0.279317	0.998927	ENSG00000074935.14	TUBE1
51.8055	-0.148208	0.3286	-0.451028	0.651969	0.998927	ENSG00000074964.17	ARHGEF10L
1.22581	0.648043	2.19963	0.294615	0.768288	NA	ENSG00000074966.11	TXK
410.49	-0.0243402	0.119765	-0.203233	0.838953	0.998927	ENSG00000075043.18	KCNQ2
2.79326	-0.374356	1.52395	-0.245649	0.805954	NA	ENSG00000075073.14	TACR2
606.123	-0.00756175	0.0996365	-0.0758934	0.939504	0.998927	ENSG00000075089.9	ACTR6
435.256	0.0731771	0.118653	0.61673	0.537413	0.998927	ENSG00000075131.10	TIPIN
1061.66	0.10698	0.0805441	1.32822	0.184107	0.96561	ENSG00000075142.13	SRI
1279.33	-0.0149875	0.0712773	-0.21027	0.833457	0.998927	ENSG00000075151.20	EIF4G3
1017.56	0.0329065	0.0850701	0.386816	0.698892	0.998927	ENSG00000075188.9	NUP37
5096.49	-0.071832	0.0445775	-1.6114	0.107093	0.813477	ENSG00000075213.11	SEMA3A
753.591	-0.162674	0.0953192	-1.70662	0.0878919	0.756625	ENSG00000075218.19	GTSE1
487.067	-0.125518	0.109116	-1.15031	0.250014	0.998927	ENSG00000075223.14	SEMA3C
273.344	0.159087	0.15121	1.05209	0.292757	0.998927	ENSG00000075234.17	TTC38
2217.49	0.0623158	0.0629059	0.990619	0.321872	0.998927	ENSG00000075239.13	ACAT1
174.929	0.224087	0.184865	1.21217	0.225448	0.998927	ENSG00000075240.17	GRAMD4
197.644	-0.227448	0.189088	-1.20286	0.229029	0.998927	ENSG00000075275.16	CELSR1
0.776258	-0.438304	2.79303	-0.156928	0.875302	NA	ENSG00000075290.7	WNT8B
1896.66	-0.000171256	0.0627457	-0.00272936	0.997822	0.99962	ENSG00000075292.19	ZNF638
661.922	0.000504628	0.0985839	0.00511876	0.995916	0.999026	ENSG00000075303.13	SLC25A40
682.615	-0.0840003	0.0947259	-0.886773	0.375201	0.998927	ENSG00000075336.12	TIMM21
426.071	-0.0977985	0.127482	-0.767155	0.44299	0.998927	ENSG00000075340.23	ADD2
2189.97	-0.12682	0.0645861	-1.96358	0.0495784	0.585265	ENSG00000075391.16	RASAL2
55.9587	-0.351344	0.324666	-1.08217	0.279176	0.998927	ENSG00000075399.14	VPS9D1
374.551	-0.168514	0.130903	-1.28731	0.197985	0.986544	ENSG00000075407.18	ZNF37A
789.649	0.0190449	0.0880128	0.216388	0.828685	0.998927	ENSG00000075413.18	MARK3
7241.7	0.0932811	0.0389587	2.39436	0.0166495	0.313017	ENSG00000075415.12	SLC25A3
569.965	-0.0363741	0.10296	-0.353283	0.723876	0.998927	ENSG00000075420.13	FNDC3B
1582.56	-0.00081202	0.0806539	-0.010068	0.991967	0.998927	ENSG00000075426.12	FOSL2
29.8226	0.0654963	0.449842	0.145599	0.884238	0.998927	ENSG00000075461.6	CACNG4
1673.52	-0.255738	0.0667093	-3.83363	0.000126267	0.0081898	ENSG00000075539.14	FRYL
676.126	0.0170927	0.101508	0.168388	0.866278	0.998927	ENSG00000075568.17	TMEM131
97.4468	0.116958	0.258845	0.451846	0.65138	0.998927	ENSG00000075618.18	FSCN1
56141.8	0.00659271	0.0394945	0.166927	0.867427	0.998927	ENSG00000075624.15	ACTB
2.35517	0.0844019	1.54579	0.0546011	0.956456	NA	ENSG00000075643.6	MOCOS
1.43117	0.944806	1.96442	0.480959	0.630546	NA	ENSG00000075651.16	PLD1
496.428	-0.0131224	0.122808	-0.106854	0.914905	0.998927	ENSG00000075702.18	WDR62
4662.11	-0.0866879	0.0443388	-1.95512	0.0505686	0.590979	ENSG00000075711.20	DLG1
3799.79	0.109166	0.0460674	2.36971	0.0178022	0.326281	ENSG00000075785.12	RAB7A
1131.86	-0.0618988	0.0803403	-0.770457	0.441029	0.998927	ENSG00000075790.10	BCAP29
33.5029	-0.158824	0.427455	-0.371557	0.710223	0.998927	ENSG00000075826.17	SEC31B
1317.3	-0.0257077	0.0695694	-0.369526	0.711736	0.998927	ENSG00000075856.12	SART3
6.46648	-0.143849	0.965958	-0.148919	0.881618	NA	ENSG00000075886.11	TUBA3D
18.2635	-0.248477	0.592471	-0.419392	0.67493	NA	ENSG00000075891.21	PAX2
601.788	0.0609172	0.102705	0.593131	0.553094	0.998927	ENSG00000075914.13	EXOSC7
162.915	0.0266057	0.186984	0.142289	0.886852	0.998927	ENSG00000075945.13	KIFAP3
674.419	0.155407	0.0962312	1.61493	0.106325	0.81134	ENSG00000075975.16	MKRN2
4526.87	-0.011789	0.0498525	-0.236477	0.813063	0.998927	ENSG00000076003.5	MCM6
651.582	0.0774821	0.099795	0.776412	0.437505	0.998927	ENSG00000076043.10	REXO2
584.023	0.0322237	0.103421	0.311577	0.755362	0.998927	ENSG00000076053.10	RBM7
411.512	0.0255056	0.123429	0.206643	0.836289	0.998927	ENSG00000076067.13	RBMS2
1217.99	-0.0633108	0.0851378	-0.743628	0.457102	0.998927	ENSG00000076108.11	BAZ2A
154.555	-0.0129177	0.201407	-0.064137	0.948861	0.998927	ENSG00000076201.15	PTPN23
321.38	0.0875989	0.133935	0.654038	0.513087	0.998927	ENSG00000076242.14	MLH1
1339.12	0.115503	0.0703511	1.64181	0.10063	0.78586	ENSG00000076248.10	UNG
12.7093	-0.704625	0.665725	-1.05843	0.289859	NA	ENSG00000076258.10	FMO4
308.741	-0.0426282	0.138661	-0.307427	0.758518	0.998927	ENSG00000076321.11	KLHL20
0.38267	-0.27647	4.02994	-0.068604	0.945305	NA	ENSG00000076344.16	RGS11
159.941	0.00644078	0.196441	0.0327874	0.973844	0.998927	ENSG00000076351.13	SLC46A1
0.386884	-0.291842	4.01402	-0.0727057	0.94204	NA	ENSG00000076356.7	PLXNA2
3488.97	-0.0282538	0.0473623	-0.596547	0.55081	0.998927	ENSG00000076382.17	SPAG5
421.825	0.0278977	0.1232	0.226442	0.820857	0.998927	ENSG00000076513.16	ANKRD13A
743.372	-0.0364316	0.0938573	-0.388159	0.697898	0.998927	ENSG00000076554.15	TPD52
108.443	0.0436759	0.231138	0.18896	0.850124	0.998927	ENSG00000076555.15	ACACB
628.792	0.288986	0.106445	2.7149	0.00662961	0.166918	ENSG00000076604.15	TRAF4
201.365	-0.217653	0.16958	-1.28348	0.199325	0.988159	ENSG00000076650.6	GPATCH1
65.8548	0.364433	0.336507	1.08299	0.278814	0.998927	ENSG00000076662.10	ICAM3
1794.36	0.0695605	0.063187	1.10087	0.270954	0.998927	ENSG00000076685.18	NT5C2
4.32269	0.128374	1.18316	0.1085	0.913599	NA	ENSG00000076706.17	AP002956.1
1.20467	0.606936	2.08715	0.290796	0.771207	NA	ENSG00000076770.14	MBNL3
36.3356	0.0931191	0.395721	0.235315	0.813964	0.998927	ENSG00000076826.9	CAMSAP3
29.2826	0.180078	0.44579	0.403952	0.686248	NA	ENSG00000076864.19	RAP1GAP
470.395	0.00476384	0.11755	0.0405261	0.967674	0.998927	ENSG00000076924.12	XAB2
187.352	-0.112104	0.179246	-0.625418	0.531697	0.998927	ENSG00000076928.17	ARHGEF1
3.64759	0.287172	1.27984	0.224381	0.822461	NA	ENSG00000076944.16	STXBP2
383.659	-0.0414728	0.125085	-0.331558	0.740223	0.998927	ENSG00000076984.17	MAP2K7
429.55	0.0644719	0.125994	0.511705	0.608858	0.998927	ENSG00000077044.10	DGKD
3.13641	-0.0451724	1.36332	-0.0331342	0.973568	NA	ENSG00000077092.19	RARB
1371.67	0.0191703	0.0729401	0.262822	0.792687	0.998927	ENSG00000077097.15	TOP2B
4155.17	0.0158876	0.0471608	0.336881	0.736207	0.998927	ENSG00000077147.16	TM9SF3
267.615	-0.0188073	0.153937	-0.122175	0.902761	0.998927	ENSG00000077150.19	NFKB2
339.26	-0.135005	0.132825	-1.01641	0.309433	0.998927	ENSG00000077152.10	UBE2T
219.325	-0.169209	0.16092	-1.05151	0.293026	0.998927	ENSG00000077157.22	PPP1R12B
1269.87	-0.0401312	0.0722995	-0.555069	0.578848	0.998927	ENSG00000077232.18	DNAJC10
2003.92	-0.012222	0.0747954	-0.163406	0.870199	0.998927	ENSG00000077235.18	GTF3C1
93.9791	-0.249314	0.254897	-0.978099	0.328025	0.998927	ENSG00000077238.14	IL4R
883.068	0.0111232	0.0963145	0.115489	0.908058	0.998927	ENSG00000077254.14	USP33
876.206	-0.0207109	0.0880167	-0.235306	0.813971	0.998927	ENSG00000077312.9	SNRPA
319.128	0.0484848	0.13874	0.349465	0.72674	0.998927	ENSG00000077348.9	EXOSC5
1500.11	-0.0261969	0.0659387	-0.397292	0.691152	0.998927	ENSG00000077380.15	DYNC1I2
197.69	0.132161	0.170372	0.775723	0.437913	0.998927	ENSG00000077454.16	LRCH4
387.727	0.04546	0.122524	0.37103	0.710615	0.998927	ENSG00000077458.13	FAM76B
147.706	0.0965531	0.196717	0.490824	0.623551	0.998927	ENSG00000077463.15	SIRT6
886.797	-0.101759	0.0840049	-1.21134	0.225764	0.998927	ENSG00000077514.8	POLD3
0.385161	-0.276474	4.02048	-0.0687664	0.945176	NA	ENSG00000077522.13	ACTN2
2368.41	-0.0106904	0.0563828	-0.189604	0.849619	0.998927	ENSG00000077549.18	CAPZB
75.9893	0.369732	0.278922	1.32558	0.18498	0.966049	ENSG00000077585.14	GPR137B
12.7433	0.822062	0.673077	1.22135	0.221954	NA	ENSG00000077616.11	NAALAD2
872.703	-0.00934921	0.0836385	-0.111781	0.910997	0.998927	ENSG00000077684.16	JADE1
368.232	0.0636332	0.129063	0.493038	0.621986	0.998927	ENSG00000077713.19	SLC25A43
1258.87	0.0477533	0.0725726	0.658008	0.510533	0.998927	ENSG00000077721.16	UBE2A
400.79	-0.0244723	0.119934	-0.204047	0.838317	0.998927	ENSG00000077782.20	FGFR1
0.812803	1.20048	2.85955	0.419815	0.674621	NA	ENSG00000077800.13	FKBP6
1.96054	-0.40995	1.68645	-0.243085	0.807939	NA	ENSG00000077935.17	SMC1B
79.1902	-0.00550019	0.267368	-0.0205716	0.983587	0.998927	ENSG00000077942.19	FBLN1
0.844864	1.2365	2.83131	0.436724	0.662312	NA	ENSG00000077984.6	CST7
1083.68	-0.0360423	0.0793978	-0.453946	0.649868	0.998927	ENSG00000078018.19	MAP2
608.87	-0.00875409	0.100376	-0.0872133	0.930502	0.998927	ENSG00000078043.16	PIAS2
471.545	-0.0963691	0.115209	-0.83647	0.402891	0.998927	ENSG00000078061.13	ARAF
611.889	0.0365918	0.104483	0.350217	0.726176	0.998927	ENSG00000078070.13	MCCC1
6.45184	-0.314964	0.932319	-0.337829	0.735492	NA	ENSG00000078081.8	LAMP3
159.448	-0.160022	0.191973	-0.833563	0.404527	0.998927	ENSG00000078114.18	NEBL
1171.6	0.0951805	0.0786986	1.20943	0.226498	0.998927	ENSG00000078124.12	ACER3
1749.63	0.029589	0.0626474	0.472311	0.636705	0.998927	ENSG00000078140.14	UBE2K
692.057	0.0104516	0.0957515	0.109153	0.913081	0.998927	ENSG00000078142.13	PIK3C3
121.711	-0.280987	0.221247	-1.27002	0.204079	0.995145	ENSG00000078177.14	N4BP2
622.884	0.0719414	0.100469	0.716056	0.473957	0.998927	ENSG00000078237.7	TIGAR
678.649	0.0864335	0.0945789	0.913878	0.360781	0.998927	ENSG00000078246.17	TULP3
256.916	-0.0963718	0.155015	-0.621694	0.534143	0.998927	ENSG00000078269.15	SYNJ2
2267.63	0.0168011	0.0683544	0.245794	0.805842	0.998927	ENSG00000078304.19	PPP2R5C
167.539	0.0896609	0.193192	0.464103	0.642574	0.998927	ENSG00000078319.9	PMS2P1
5930.69	0.00862293	0.0431028	0.200055	0.841438	0.998927	ENSG00000078369.18	GNB1
0.389375	-0.29182	4.00472	-0.072869	0.94191	NA	ENSG00000078401.7	EDN1
700.702	-0.212508	0.0924923	-2.29757	0.0215861	0.367226	ENSG00000078403.17	MLLT10
67.7738	0.0134023	0.29779	0.0450057	0.964103	0.998927	ENSG00000078487.17	ZCWPW1
13.163	0.495975	0.720524	0.688353	0.49123	NA	ENSG00000078589.13	P2RY10
1.34467	-0.846103	2.06667	-0.409404	0.682244	NA	ENSG00000078596.11	ITM2A
3336.2	-0.0347325	0.0559624	-0.62064	0.534837	0.998927	ENSG00000078618.21	NRDC
4007.53	0.100423	0.0582271	1.72468	0.0845846	0.745865	ENSG00000078668.14	VDAC3
2396.43	-0.0533728	0.056935	-0.937434	0.348535	0.998927	ENSG00000078674.17	PCM1
121.089	0.00665516	0.216775	0.0307007	0.975508	0.998927	ENSG00000078687.17	TNRC6C
215.056	0.0967277	0.163003	0.593412	0.552906	0.998927	ENSG00000078699.21	CBFA2T2
2241.25	-0.015561	0.0580737	-0.267953	0.788735	0.998927	ENSG00000078747.14	ITCH
4.84242	-1.72809	1.14691	-1.50674	0.131877	NA	ENSG00000078795.16	PKD2L2
171.29	0.256109	0.184357	1.3892	0.164771	0.94438	ENSG00000078804.13	TP53INP2
1551.36	0.0383533	0.0713804	0.537308	0.591055	0.998927	ENSG00000078808.16	SDF4
3.07467	1.62326	1.54145	1.05307	0.292308	NA	ENSG00000078814.15	MYH7B
75.2916	-0.433933	0.288139	-1.50598	0.132071	0.888056	ENSG00000078900.15	TP73
218.758	0.123152	0.169129	0.728154	0.466519	0.998927	ENSG00000078902.16	TOLLIP
239.543	0.0530151	0.16666	0.318103	0.750407	0.998927	ENSG00000078967.13	UBE2D4
4.0982	-0.798837	1.15247	-0.693155	0.488212	NA	ENSG00000079101.16	CLUL1
651.68	-0.025538	0.095445	-0.267568	0.789032	0.998927	ENSG00000079134.12	THOC1
11.8139	0.676981	0.70743	0.956959	0.338588	NA	ENSG00000079150.18	FKBP7
76.2096	-0.0546395	0.275131	-0.198594	0.84258	0.998927	ENSG00000079156.17	OSBPL6
112.773	-0.139289	0.222835	-0.625077	0.53192	0.998927	ENSG00000079215.14	SLC1A3
10741	0.0103968	0.0440848	0.235837	0.813559	0.998927	ENSG00000079246.16	XRCC5
0.953571	-1.00131	2.37809	-0.421057	0.673714	NA	ENSG00000079257.8	LXN
0.787447	1.15663	2.88266	0.401237	0.688246	NA	ENSG00000079263.19	SP140
191.141	-0.0655271	0.187027	-0.350362	0.726067	0.998927	ENSG00000079277.20	MKNK1
2.00628	0.194994	1.63319	0.119395	0.904963	NA	ENSG00000079308.19	TNS1
443.743	-0.0143211	0.141664	-0.101092	0.919477	0.998927	ENSG00000079313.15	REXO1
3337.34	0.0346946	0.0521762	0.66495	0.506082	0.998927	ENSG00000079332.15	SAR1A
121.412	-0.00192564	0.21873	-0.00880374	0.992976	0.998927	ENSG00000079335.20	CDC14A
6.19196	0.272358	0.991564	0.274675	0.783566	NA	ENSG00000079337.16	RAPGEF3
14.0187	0.199821	0.628231	0.31807	0.750432	NA	ENSG00000079385.22	CEACAM1
799.042	-0.0111881	0.0869089	-0.128734	0.897568	0.998927	ENSG00000079387.14	SENP1
209.734	0.0988856	0.174981	0.565121	0.571991	0.998927	ENSG00000079432.7	CIC
3.6832	-1.17102	1.23063	-0.951565	0.341318	NA	ENSG00000079435.10	LIPE
1926.82	0.0250462	0.0663741	0.377349	0.705914	0.998927	ENSG00000079459.13	FDFT1
358.764	0.0667416	0.132633	0.503206	0.614819	0.998927	ENSG00000079462.7	PAFAH1B3
502.46	-0.10711	0.111095	-0.964129	0.334981	0.998927	ENSG00000079482.13	OPHN1
1588.73	0.0203524	0.0688948	0.295413	0.767678	0.998927	ENSG00000079616.12	KIF22
79.7121	-0.0335186	0.279171	-0.120065	0.904432	0.998927	ENSG00000079691.18	CARMIL1
751.507	-0.0509589	0.089918	-0.566727	0.5709	0.998927	ENSG00000079739.17	PGM1
4216.28	0.0439956	0.0549091	0.801245	0.42299	0.998927	ENSG00000079785.15	DDX1
1505.31	0.00588716	0.0670111	0.0878535	0.929993	0.998927	ENSG00000079805.16	DNM2
537.069	-0.000661579	0.107552	-0.00615125	0.995092	0.998927	ENSG00000079819.19	EPB41L2
332.247	-0.0369832	0.135084	-0.273778	0.784255	0.998927	ENSG00000079950.14	STX7
112.69	0.0144366	0.223509	0.0645909	0.9485	0.998927	ENSG00000079974.17	RABL2B
660.55	0.0982531	0.0971837	1.011	0.312015	0.998927	ENSG00000079999.14	KEAP1
0.618365	0.632389	3.13757	0.201554	0.840266	NA	ENSG00000080007.8	DDX43
86.8693	0.196712	0.257748	0.763194	0.445348	0.998927	ENSG00000080031.10	PTPRH
0.631276	2.63927	3.3174	0.795584	0.426274	NA	ENSG00000080166.16	DCT
387.231	0.0756147	0.122974	0.614883	0.538632	0.998927	ENSG00000080189.15	SLC35C2
66.3465	-0.0440651	0.293726	-0.150021	0.880748	0.998927	ENSG00000080200.10	CRYBG3
52.4281	-0.331394	0.33316	-0.994699	0.319883	0.998927	ENSG00000080298.15	RFX3
3582.33	-0.092026	0.0464593	-1.98079	0.0476148	0.575503	ENSG00000080345.17	RIF1
841.261	0.0520948	0.0868017	0.600159	0.548401	0.998927	ENSG00000080371.6	RAB21
41.3256	-0.178014	0.392705	-0.453303	0.650331	0.998927	ENSG00000080503.24	SMARCA2
268.95	0.0579951	0.148426	0.390735	0.695993	0.998927	ENSG00000080546.13	SESN1
18.5998	0.097501	0.560614	0.173918	0.86193	NA	ENSG00000080561.13	MID2
5.11952	0.723978	1.07636	0.672616	0.501192	NA	ENSG00000080573.7	COL5A3
561.791	-0.221924	0.24627	-0.90114	0.367514	0.998927	ENSG00000080603.17	SRCAP
1505.39	0.0936299	0.0757482	1.23607	0.216433	0.998927	ENSG00000080608.10	PUM3
1.77136	-0.0703347	1.7526	-0.0401316	0.967988	NA	ENSG00000080618.15	CPB2
18.6108	0.525373	0.559936	0.938274	0.348104	NA	ENSG00000080644.16	CHRNA3
474.686	0.0726089	0.120956	0.600294	0.54831	0.998927	ENSG00000080802.18	CNOT4
934.488	-0.0231592	0.0844941	-0.274093	0.784013	0.998927	ENSG00000080815.19	PSEN1
435.27	-0.103154	0.123681	-0.834028	0.404265	0.998927	ENSG00000080819.8	CPOX
1098.72	0.172519	0.07792	2.21405	0.0268254	0.411547	ENSG00000080822.17	CLDND1
2631.69	-0.0945604	0.0541421	-1.74652	0.0807204	0.734361	ENSG00000080823.23	MOK
75194.5	0.097291	0.0379229	2.56549	0.010303	0.227744	ENSG00000080824.18	HSP90AA1
743.421	-0.157751	0.093409	-1.68882	0.0912545	0.764192	ENSG00000080839.11	RBL1
263.878	-0.0278572	0.15409	-0.180785	0.856536	0.998927	ENSG00000080845.17	DLGAP4
38.6921	-0.504791	0.433817	-1.1636	0.244585	0.998927	ENSG00000080854.14	IGSF9B
28.9942	-0.328676	0.4402	-0.74665	0.455275	NA	ENSG00000080947.14	CROCCP3
1899.15	-0.0246286	0.0637854	-0.386117	0.69941	0.998927	ENSG00000080986.13	NDC80
519.721	-0.126295	0.115658	-1.09197	0.274847	0.998927	ENSG00000081014.11	AP4E1
404.808	-0.0183365	0.12044	-0.152246	0.878993	0.998927	ENSG00000081019.13	RSBN1
66.1013	-0.180289	0.290913	-0.619735	0.535432	0.998927	ENSG00000081026.19	MAGI3
80.4966	0.459694	0.274804	1.67281	0.0943645	0.770229	ENSG00000081041.9	CXCL2
3.06176	1.08352	1.39371	0.777436	0.436901	NA	ENSG00000081052.12	COL4A4
847.022	-0.00923973	0.0863962	-0.106946	0.914832	0.998927	ENSG00000081059.20	TCF7
719.092	-0.0189648	0.0916009	-0.207037	0.835981	0.998927	ENSG00000081087.15	OSTM1
1.81882	0.621262	1.74389	0.356252	0.721652	NA	ENSG00000081148.12	IMPG2
2072.31	0.0193883	0.0602899	0.321585	0.747767	0.998927	ENSG00000081154.11	PCNP
187.684	-0.068327	0.181679	-0.376086	0.706853	0.998927	ENSG00000081177.18	EXD2
69.2535	0.0818814	0.297292	0.275424	0.78299	0.998927	ENSG00000081181.8	ARG2
2.13364	-0.660785	1.59411	-0.414517	0.678496	NA	ENSG00000081189.15	MEF2C
2.25469	0.459546	1.60681	0.285999	0.774879	NA	ENSG00000081237.20	PTPRC
1056.23	-0.0294458	0.0856618	-0.343746	0.731038	0.998927	ENSG00000081307.12	UBA5
349.62	0.0701444	0.131081	0.535124	0.592564	0.998927	ENSG00000081320.11	STK17B
295.985	-0.0913764	0.141784	-0.644476	0.519267	0.998927	ENSG00000081377.16	CDC14B
300.027	-0.375714	0.141132	-2.66215	0.00776428	0.18779	ENSG00000081386.12	ZNF510
40.9895	-0.286312	0.371117	-0.771488	0.440418	0.998927	ENSG00000081665.14	ZNF506
167.154	-0.117002	0.213	-0.549306	0.582795	0.998927	ENSG00000081692.12	JMJD4
495.843	-0.0573302	0.115269	-0.497359	0.618936	0.998927	ENSG00000081721.11	DUSP12
535.759	-0.00687955	0.108859	-0.0631967	0.94961	0.998927	ENSG00000081760.17	AACS
544.116	-0.0709807	0.105591	-0.672222	0.501442	0.998927	ENSG00000081791.9	DELE1
0.758365	-1.88036	3.0491	-0.616694	0.537436	NA	ENSG00000081853.15	PCDHGA2
564.826	0.101164	0.110877	0.912393	0.361562	0.998927	ENSG00000081870.11	HSPB11
198.724	-0.250001	0.174581	-1.432	0.152143	0.925442	ENSG00000081913.14	PHLPP1
33.8214	0.0503838	0.414631	0.121515	0.903283	0.998927	ENSG00000081923.13	ATP8B1
2.74128	0.00035478	1.4765	0.000240284	0.999808	NA	ENSG00000081985.11	IL12RB2
218.213	-0.148482	0.163	-0.910933	0.362331	0.998927	ENSG00000082014.16	SMARCD3
700.466	-0.0571594	0.107257	-0.53292	0.594089	0.998927	ENSG00000082068.8	WDR70
1.61346	0.378322	2.09862	0.180272	0.856939	NA	ENSG00000082074.17	FYB1
828.368	0.0242829	0.0891325	0.272436	0.785287	0.998927	ENSG00000082146.13	STRADB
12484.7	0.112648	0.0407554	2.764	0.00570979	0.148137	ENSG00000082153.18	BZW1
0.430133	2.07995	3.82691	0.543506	0.586781	NA	ENSG00000082196.20	C1QTNF3
3068.49	-0.00720429	0.0543215	-0.132623	0.894491	0.998927	ENSG00000082212.13	ME2
1132.09	-0.113577	0.0787776	-1.44175	0.149373	0.924423	ENSG00000082213.18	C5orf22
1072.98	0.258188	0.0764359	3.37783	0.000730596	0.033848	ENSG00000082258.13	CCNT2
52.5064	-0.130813	0.366441	-0.356982	0.721105	0.998927	ENSG00000082269.16	FAM135A
112.888	0.14969	0.236869	0.631953	0.527417	0.998927	ENSG00000082458.12	DLG3
181.739	-0.0599284	0.178125	-0.336439	0.73654	0.998927	ENSG00000082512.15	TRAF5
936.412	0.111558	0.0898155	1.24208	0.214206	0.998927	ENSG00000082515.18	MRPL22
2889.26	0.00800552	0.0502836	0.159207	0.873505	0.998927	ENSG00000082516.9	GEMIN5
1959.2	0.0115787	0.0589125	0.196541	0.844187	0.998927	ENSG00000082641.16	NFE2L1
825.788	-0.0581704	0.0936161	-0.621372	0.534355	0.998927	ENSG00000082701.15	GSK3B
341.53	0.0924572	0.134947	0.685135	0.493259	0.998927	ENSG00000082781.12	ITGB5
939.185	0.0513555	0.0820397	0.625983	0.531326	0.998927	ENSG00000082805.20	ERC1
10801.9	-0.0459222	0.0369378	-1.24323	0.213783	0.998927	ENSG00000082898.16	XPO1
581.736	0.0333784	0.101115	0.330102	0.741323	0.998927	ENSG00000082996.19	RNF13
0.862758	3.08258	2.74433	1.12326	0.261329	NA	ENSG00000083067.22	TRPM3
465.731	-0.17239	0.12251	-1.40714	0.159384	0.937817	ENSG00000083093.9	PALB2
213.817	-0.108972	0.166157	-0.655838	0.511928	0.998927	ENSG00000083097.14	DOP1A
852.883	-0.0943344	0.0848747	-1.11146	0.266373	0.998927	ENSG00000083099.11	LYRM2
373.841	-0.129967	0.131925	-0.98516	0.324545	0.998927	ENSG00000083123.15	BCKDHB
1411.69	-0.0249554	0.0713609	-0.349707	0.726558	0.998927	ENSG00000083168.11	KAT6A
511.717	0.00236642	0.107965	0.0219184	0.982513	0.998927	ENSG00000083223.18	TUT7
491.411	-0.0400221	0.111153	-0.360063	0.7188	0.998927	ENSG00000083290.20	ULK2
8307.02	-0.015761	0.0378476	-0.416435	0.677092	0.998927	ENSG00000083312.17	TNPO1
1501.35	-0.0194642	0.0869819	-0.223773	0.822934	0.998927	ENSG00000083444.17	PLOD1
151.132	0.0501968	0.206864	0.242656	0.808272	0.998927	ENSG00000083454.22	P2RX5
281.266	0.153224	0.151763	1.00963	0.312674	0.998927	ENSG00000083457.12	ITGAE
1311.48	0.0260099	0.0758303	0.343001	0.731597	0.998927	ENSG00000083520.15	DIS3
300.66	0.0410317	0.145076	0.282828	0.777309	0.998927	ENSG00000083535.16	PIBF1
190.422	-0.0379775	0.192782	-0.196997	0.84383	0.998927	ENSG00000083544.14	TDRD3
257.373	0.0584031	0.148656	0.392873	0.694413	0.998927	ENSG00000083635.8	NUFIP1
1209.34	-0.158543	0.0738494	-2.14684	0.031806	0.458438	ENSG00000083642.19	PDS5B
999.879	-0.0380255	0.0828996	-0.458694	0.646454	0.998927	ENSG00000083720.13	OXCT1
166.205	0.0011223	0.184091	0.00609645	0.995136	0.998927	ENSG00000083750.12	RRAGB
686.8	-0.0094133	0.0963949	-0.0976535	0.922207	0.998927	ENSG00000083799.17	CYLD
62.137	-0.271673	0.299529	-0.907	0.364407	0.998927	ENSG00000083807.10	SLC27A5
135.207	0.050959	0.212045	0.240322	0.810081	0.998927	ENSG00000083812.12	ZNF324
3.95793	-0.662788	1.21344	-0.546206	0.584925	NA	ENSG00000083814.13	ZNF671
103.809	-0.163763	0.261909	-0.625266	0.531797	0.998927	ENSG00000083817.9	ZNF416
95.0089	0.0583839	0.247872	0.23554	0.813789	0.998927	ENSG00000083828.16	ZNF586
40.7134	-0.174417	0.378111	-0.461284	0.644595	0.998927	ENSG00000083838.15	ZNF446
261.123	-0.174331	0.151871	-1.14789	0.251013	0.998927	ENSG00000083844.10	ZNF264
9374.65	0.0736259	0.0411041	1.7912	0.0732606	0.703965	ENSG00000083845.9	RPS5
1065.52	-0.173101	0.0878672	-1.97003	0.0488353	0.581195	ENSG00000083857.14	FAT1
1210.96	0.112399	0.0781649	1.43797	0.150443	0.924912	ENSG00000083896.12	YTHDC1
473.446	0.0883885	0.113768	0.776922	0.437205	0.998927	ENSG00000083937.9	CHMP2B
458.021	0.0827229	0.119407	0.692779	0.488448	0.998927	ENSG00000084070.12	SMAP2
827.45	0.0268698	0.0931473	0.288465	0.772991	0.998927	ENSG00000084072.16	PPIE
2883.9	-0.0122525	0.0528483	-0.231843	0.81666	0.998927	ENSG00000084073.9	ZMPSTE24
4144.27	0.0930924	0.0490476	1.898	0.0576957	0.633676	ENSG00000084090.13	STARD7
291.493	0.0448407	0.148941	0.301064	0.763365	0.998927	ENSG00000084092.7	NOA1
1296.43	-0.145131	0.071846	-2.02003	0.0433799	0.54615	ENSG00000084093.17	REST
1.7902	0.587718	1.78398	0.329442	0.741822	NA	ENSG00000084110.11	HAL
673.563	-0.0987001	0.0977135	-1.0101	0.312449	0.998927	ENSG00000084112.15	SSH1
3930.57	0.10891	0.048402	2.25013	0.024441	0.38982	ENSG00000084207.16	GSTP1
7860.1	-0.00850659	0.0369761	-0.230057	0.818048	0.998927	ENSG00000084234.17	APLP2
256.138	0.160091	0.151033	1.05998	0.289155	0.998927	ENSG00000084444.14	FAM234B
0.38267	-0.27647	4.02994	-0.068604	0.945305	NA	ENSG00000084453.16	SLCO1A2
2552.88	0.0759111	0.0534617	1.41992	0.155632	0.928464	ENSG00000084463.8	WBP11
3997.97	0.0579112	0.0447553	1.29395	0.195682	0.98389	ENSG00000084623.11	EIF3I
29.2024	0.0566197	0.446988	0.12667	0.899202	NA	ENSG00000084628.10	NKAIN1
2.13938	-1.17086	1.68782	-0.693712	0.487863	NA	ENSG00000084636.18	COL16A1
3288.8	0.0880789	0.0524603	1.67896	0.0931597	0.769857	ENSG00000084652.16	TXLNA
445.697	0.0484532	0.117114	0.413728	0.679073	0.998927	ENSG00000084676.15	NCOA1
436.42	0.0956856	0.118565	0.807033	0.419647	0.998927	ENSG00000084693.16	AGBL5
64.4006	0.137445	0.316308	0.434529	0.663904	0.998927	ENSG00000084710.14	EFR3B
164.146	0.0682895	0.193723	0.35251	0.724456	0.998927	ENSG00000084731.15	KIF3C
2516.74	0.0451413	0.0548816	0.822521	0.41078	0.998927	ENSG00000084733.11	RAB10
4627.21	-0.010993	0.0488121	-0.22521	0.821816	0.998927	ENSG00000084754.12	HADHA
84.1823	-0.11427	0.271039	-0.421601	0.673316	0.998927	ENSG00000084764.11	MAPRE3
1427.18	-0.12039	0.0796181	-1.5121	0.130509	0.88742	ENSG00000084774.14	CAD
2608.11	0.0799313	0.053067	1.50624	0.132007	0.888056	ENSG00000085063.16	CD59
99.2905	-0.116922	0.238149	-0.490961	0.623454	0.998927	ENSG00000085117.12	CD82
266.832	-0.0831822	0.159887	-0.520254	0.602886	0.998927	ENSG00000085185.15	BCORL1
3422.69	-0.12842	0.0528702	-2.42897	0.0151418	0.299173	ENSG00000085224.22	ATRX
793.066	0.127059	0.0929832	1.36647	0.171791	0.953715	ENSG00000085231.14	AK6
414.244	0.120556	0.120775	0.998186	0.318189	0.998927	ENSG00000085274.15	MYNN
1.75768	-0.716853	1.71842	-0.417157	0.676564	NA	ENSG00000085276.18	MECOM
831.254	-0.054802	0.0874238	-0.626855	0.530754	0.998927	ENSG00000085365.18	SCAMP1
580.268	-0.0075177	0.106747	-0.0704256	0.943855	0.998927	ENSG00000085377.14	PREP
247.471	-0.137828	0.159937	-0.861764	0.388818	0.998927	ENSG00000085382.12	HACE1
3397.97	0.054392	0.0484714	1.12215	0.2618	0.998927	ENSG00000085415.16	SEH1L
531.473	0.03987	0.117509	0.339292	0.734389	0.998927	ENSG00000085433.15	WDR47
683.31	-0.104784	0.10248	-1.02249	0.30655	0.998927	ENSG00000085449.15	WDFY1
3.15775	0.319608	1.3575	0.235439	0.813868	NA	ENSG00000085465.12	OVGP1
615.775	-0.0514068	0.0999169	-0.514496	0.606905	0.998927	ENSG00000085491.17	SLC25A24
665.874	-0.0265572	0.0952168	-0.278913	0.780312	0.998927	ENSG00000085511.20	MAP3K4
4.17322	0.305217	1.15172	0.265009	0.791003	NA	ENSG00000085514.16	PILRA
46.6161	0.106813	0.355238	0.300679	0.763659	0.998927	ENSG00000085644.13	ZNF213
226.241	-0.0727997	0.160056	-0.454841	0.649224	0.998927	ENSG00000085662.14	AKR1B1
1581.96	-0.0406841	0.073736	-0.551754	0.581117	0.998927	ENSG00000085719.13	CPNE3
2327.5	0.178553	0.0555334	3.21523	0.00130341	0.0519999	ENSG00000085721.12	RRN3
2519.67	-0.0276292	0.0554656	-0.498131	0.618391	0.998927	ENSG00000085733.16	CTTN
1.79519	0.592291	1.7469	0.339053	0.73457	NA	ENSG00000085741.13	WNT11
1348.4	0.102257	0.0714964	1.43025	0.152647	0.925442	ENSG00000085760.14	MTIF2
842.528	-0.13325	0.0866413	-1.53795	0.124061	0.869592	ENSG00000085788.13	DDHD2
24.1806	-0.196581	0.476	-0.412985	0.679618	NA	ENSG00000085831.15	TTC39A
1262.42	-0.0437676	0.0750198	-0.583413	0.559615	0.998927	ENSG00000085832.17	EPS15
852.561	0.0543383	0.0897619	0.605361	0.544939	0.998927	ENSG00000085840.13	ORC1
173.875	-0.0314238	0.181307	-0.173318	0.862402	0.998927	ENSG00000085871.9	MGST2
624.344	0.0153942	0.10787	0.142711	0.886519	0.998927	ENSG00000085872.15	CHERP
650.144	0.00465679	0.0969511	0.0480324	0.96169	0.998927	ENSG00000085978.22	ATG16L1
573.256	-0.0444205	0.103267	-0.43015	0.667086	0.998927	ENSG00000085982.13	USP40
678.291	0.0463235	0.0960645	0.482212	0.629655	0.998927	ENSG00000085998.14	POMGNT1
383.882	-0.00129919	0.135975	-0.00955466	0.992377	0.998927	ENSG00000085999.12	RAD54L
874.063	-0.0152528	0.0906561	-0.168249	0.866387	0.998927	ENSG00000086015.21	MAST2
6407.77	0.220343	0.0505937	4.35514	1.32982e-05	0.00113326	ENSG00000086061.16	DNAJA1
293.93	0.0598399	0.150703	0.397073	0.691314	0.998927	ENSG00000086062.12	B4GALT1
754.324	0.110444	0.0953514	1.15829	0.246746	0.998927	ENSG00000086065.14	CHMP5
666.193	-0.0324884	0.0942467	-0.344717	0.730307	0.998927	ENSG00000086102.19	NFX1
2.22781	1.01846	1.611	0.632189	0.527263	NA	ENSG00000086159.13	AQP6
1048.97	0.00587046	0.0822249	0.0713951	0.943083	0.998927	ENSG00000086189.10	DIMT1
1734.02	0.0105855	0.0648294	0.163283	0.870296	0.998927	ENSG00000086200.16	IPO11
2863.05	-0.00969904	0.0543986	-0.178296	0.858491	0.998927	ENSG00000086232.13	EIF2AK1
206.478	-0.0359645	0.173937	-0.206768	0.836191	0.998927	ENSG00000086289.12	EPDR1
574.878	-0.000347006	0.107716	-0.00322149	0.99743	0.999511	ENSG00000086300.15	SNX10
1776.66	0.00893356	0.0664623	0.134415	0.893074	0.998927	ENSG00000086475.15	SEPHS1
860.774	0.0655404	0.0862917	0.759522	0.447541	0.998927	ENSG00000086504.16	MRPL28
204.697	0.680547	0.18186	3.74215	0.000182455	0.0109239	ENSG00000086544.3	ITPKC
1.32256	-1.7488	2.22718	-0.785209	0.432331	NA	ENSG00000086570.12	FAT2
1197.72	0.182128	0.0783905	2.32334	0.0201608	0.35289	ENSG00000086589.12	RBM22
7029.7	0.0478427	0.0388503	1.23146	0.21815	0.998927	ENSG00000086598.11	TMED2
110.374	-0.0328661	0.228978	-0.143534	0.885869	0.998927	ENSG00000086619.13	ERO1B
452.896	0.11055	0.117373	0.94187	0.346259	0.998927	ENSG00000086666.19	ZFAND6
6.76952	0.477468	0.970181	0.492143	0.622618	NA	ENSG00000086696.11	HSD17B2
2028.61	0.176613	0.0604722	2.92056	0.00349402	0.104063	ENSG00000086712.13	TXLNG
12.4953	0.491758	0.72204	0.681068	0.495828	NA	ENSG00000086730.17	LAT2
2635.08	-0.110913	0.0629085	-1.76309	0.0778857	0.723402	ENSG00000086758.16	HUWE1
1606.5	0.0163214	0.0673494	0.242339	0.808518	0.998927	ENSG00000086827.9	ZW10
371.235	0.0414933	0.127661	0.325028	0.74516	0.998927	ENSG00000086848.15	ALG9
97.1408	-0.0269223	0.249414	-0.107942	0.914041	0.998927	ENSG00000087008.16	ACOX3
877.831	-0.0597275	0.0952717	-0.626918	0.530713	0.998927	ENSG00000087053.18	MTMR2
688.563	1.10788	0.105368	10.5144	7.41625e-26	7.21539e-23	ENSG00000087074.8	PPP1R15A
6.8835	-0.305998	0.90231	-0.339127	0.734514	NA	ENSG00000087076.9	HSD17B14
943.901	0.045328	0.0815056	0.556133	0.57812	0.998927	ENSG00000087077.14	TRIP6
13.3192	-0.39622	0.664429	-0.596331	0.550954	NA	ENSG00000087085.15	ACHE
16449.8	0.187983	0.0353381	5.31957	1.04013e-07	1.31995e-05	ENSG00000087086.15	FTL
1856.61	0.170611	0.0726913	2.34707	0.0189219	0.340916	ENSG00000087087.20	SRRT
741.617	-0.0231298	0.0945124	-0.244728	0.806667	0.998927	ENSG00000087088.20	BAX
307.896	-0.0872691	0.149167	-0.585045	0.558518	0.998927	ENSG00000087095.13	NLK
636.7	0.0397929	0.105286	0.377952	0.705466	0.998927	ENSG00000087111.21	PIGS
683.849	-0.0903857	0.0981649	-0.920754	0.357179	0.998927	ENSG00000087152.15	ATXN7L3
246.496	-0.196004	0.154983	-1.26469	0.205984	0.996213	ENSG00000087157.19	PGS1
2735.4	0.0326875	0.0521556	0.62673	0.530836	0.998927	ENSG00000087191.13	PSMC5
742.091	0.0267663	0.0973092	0.275064	0.783267	0.998927	ENSG00000087206.17	UIMC1
0.430133	2.07995	3.82691	0.543506	0.586781	NA	ENSG00000087237.12	CETP
23.5312	0.0986042	0.521859	0.188948	0.850134	NA	ENSG00000087258.15	GNAO1
2078.28	0.0577678	0.0590295	0.978627	0.327764	0.998927	ENSG00000087263.16	OGFOD1
388.711	0.0187646	0.125355	0.149691	0.881008	0.998927	ENSG00000087266.16	SH3BP2
1116.1	0.110018	0.0776588	1.41668	0.156576	0.930156	ENSG00000087269.16	NOP14
1081.81	0.0128212	0.0755176	0.169777	0.865185	0.998927	ENSG00000087274.17	ADD1
562.756	0.00698357	0.106181	0.0657706	0.94756	0.998927	ENSG00000087299.12	L2HGDH
196.527	-0.178056	0.176912	-1.00647	0.314191	0.998927	ENSG00000087301.9	TXNDC16
1704.56	0.0845151	0.0643986	1.31237	0.189394	0.974584	ENSG00000087302.9	RTRAF
3.34816	1.2334	1.38254	0.892131	0.372323	NA	ENSG00000087303.18	NID2
291.948	-0.0289767	0.152389	-0.19015	0.849192	0.998927	ENSG00000087338.5	GMCL1
3057.95	0.0125483	0.0512741	0.24473	0.806665	0.998927	ENSG00000087365.15	SF3B2
546.026	-0.297055	0.104353	-2.84664	0.00441827	0.123992	ENSG00000087448.11	KLHL42
4983.03	0.0458396	0.0474798	0.965456	0.334317	0.998927	ENSG00000087460.24	GNAS
3474.33	0.0183912	0.0485927	0.378477	0.705077	0.998927	ENSG00000087470.17	DNM1L
1.40906	0.0523256	2.03127	0.0257601	0.979449	NA	ENSG00000087494.15	PTHLH
1498.71	0.0109109	0.071739	0.152091	0.879115	0.998927	ENSG00000087502.18	ERGIC2
2930.73	-0.026588	0.0528715	-0.50288	0.615049	0.998927	ENSG00000087586.17	AURKA
5.54477	-0.176739	1.00764	-0.175399	0.860766	NA	ENSG00000087589.16	CASS4
165.369	0.233731	0.187165	1.2488	0.211739	0.998927	ENSG00000087842.11	PIR
116.117	-0.241892	0.220703	-1.09601	0.273074	0.998927	ENSG00000087884.14	AAMDC
74.899	-0.117642	0.297488	-0.395452	0.692509	0.998927	ENSG00000087903.13	RFX2
503.01	0.0226783	0.111327	0.20371	0.83858	0.998927	ENSG00000087995.15	METTL2A
6.42773	-0.835128	0.967374	-0.863294	0.387976	NA	ENSG00000088002.11	SULT2B1
293.355	0.0727884	0.146643	0.496364	0.619638	0.998927	ENSG00000088035.17	ALG6
401.434	0.116342	0.123022	0.945702	0.344301	0.998927	ENSG00000088038.19	CNOT3
0.38267	-0.27647	4.02994	-0.068604	0.945305	NA	ENSG00000088053.11	GP6
325.633	-0.117738	0.139043	-0.846775	0.39712	0.998927	ENSG00000088179.9	PTPN4
4944.54	0.0500692	0.0475264	1.0535	0.29211	0.998927	ENSG00000088205.13	DDX18
4095.01	0.0200906	0.0557764	0.360199	0.718698	0.998927	ENSG00000088247.17	KHSRP
1036.38	0.0532829	0.0875657	0.60849	0.542863	0.998927	ENSG00000088256.9	GNA11
88.3466	0.0408696	0.254464	0.160611	0.8724	0.998927	ENSG00000088280.19	ASAP3
145.592	0.242356	0.206433	1.17402	0.240387	0.998927	ENSG00000088298.13	EDEM2
131.673	0.147296	0.217894	0.676	0.499041	0.998927	ENSG00000088305.18	DNMT3B
7791.69	0.000672365	0.0375222	0.0179191	0.985703	0.998927	ENSG00000088325.16	TPX2
22.1118	0.0545941	0.510108	0.107024	0.91477	NA	ENSG00000088340.16	FER1L4
590.281	0.308468	0.10261	3.00622	0.00264513	0.0855455	ENSG00000088356.6	PDRG1
129.384	0.00761455	0.217245	0.0350506	0.972039	0.998927	ENSG00000088367.22	EPB41L1
145.012	-0.363789	0.209036	-1.74032	0.0818033	0.736737	ENSG00000088387.19	DOCK9
224.874	0.0710138	0.166054	0.427655	0.668902	0.998927	ENSG00000088448.14	ANKRD10
260.683	0.224747	0.159852	1.40597	0.159732	0.937817	ENSG00000088451.11	TGDS
6.23902	-0.226316	0.984582	-0.229859	0.818201	NA	ENSG00000088538.13	DOCK3
16.666	0.227017	0.621939	0.365014	0.715101	NA	ENSG00000088543.15	C3orf18
923.741	-0.00187501	0.0810621	-0.0231306	0.981546	0.998927	ENSG00000088682.14	COQ9
26.8429	0.185479	0.479795	0.386581	0.699067	NA	ENSG00000088726.16	TMEM40
112.452	0.190076	0.227945	0.833868	0.404355	0.998927	ENSG00000088727.12	KIF9
0.60592	2.59106	3.36057	0.77102	0.440695	NA	ENSG00000088756.12	ARHGAP28
857.217	-0.0221601	0.0876825	-0.252731	0.800476	0.998927	ENSG00000088766.11	CRLS1
194.762	0.0538872	0.174199	0.309343	0.75706	0.998927	ENSG00000088808.17	PPP1R13B
577.982	-0.0947152	0.105514	-0.897656	0.369369	0.998927	ENSG00000088812.18	ATRN
80.5568	0.0924485	0.281867	0.327987	0.742922	0.998927	ENSG00000088826.18	SMOX
0.385161	-0.276474	4.02048	-0.0687664	0.945176	NA	ENSG00000088827.12	SIGLEC1
3300.73	0.047272	0.0505978	0.93427	0.350165	0.998927	ENSG00000088832.17	FKBP1A
1134.16	0.0649729	0.0748341	0.868226	0.385271	0.998927	ENSG00000088833.17	NSFL1C
25.8704	0.409795	0.480262	0.853275	0.393507	NA	ENSG00000088836.13	SLC4A11
213.262	0.105082	0.176927	0.59393	0.552559	0.998927	ENSG00000088854.12	C20orf194
160.653	-0.205788	0.190087	-1.0826	0.278987	0.998927	ENSG00000088876.11	ZNF343
8.51648	0.628129	0.845626	0.742798	0.457604	NA	ENSG00000088881.20	EBF4
1805.96	-0.0794821	0.0647671	-1.2272	0.219748	0.998927	ENSG00000088888.18	MAVS
73.4931	0.00246677	0.284554	0.00866889	0.993083	0.998927	ENSG00000088899.15	LZTS3
3670.53	0.0547567	0.0504587	1.08518	0.277843	0.998927	ENSG00000088930.8	XRN2
148.731	0.156697	0.196859	0.795984	0.426042	0.998927	ENSG00000088970.16	KIZ
3772.01	0.104708	0.0535911	1.95383	0.0507211	0.591577	ENSG00000088986.11	DYNLL1
36.002	0.264507	0.42146	0.627598	0.530267	0.998927	ENSG00000088992.18	TESC
2950.94	0.152165	0.0525204	2.89727	0.0037643	0.11098	ENSG00000089006.16	SNX5
24084.4	0.0932341	0.0408823	2.28055	0.0225753	0.376466	ENSG00000089009.15	RPL6
674.857	-0.040671	0.094407	-0.430805	0.66661	0.998927	ENSG00000089022.14	MAPKAPK5
1450.14	0.183783	0.0772351	2.37952	0.0173351	0.320233	ENSG00000089048.14	ESF1
593.975	0.0262967	0.105859	0.248413	0.803815	0.998927	ENSG00000089050.16	RBBP9
3862.55	0.0171001	0.0492474	0.34723	0.728419	0.998927	ENSG00000089053.13	ANAPC5
517.42	-0.0803531	0.109444	-0.734193	0.462831	0.998927	ENSG00000089057.15	SLC23A2
64.5486	-0.177263	0.29764	-0.595563	0.551467	0.998927	ENSG00000089060.11	SLC8B1
1574.21	0.00995815	0.0654647	0.152115	0.879096	0.998927	ENSG00000089063.15	TMEM230
23.4864	-0.08866	0.495648	-0.178877	0.858034	NA	ENSG00000089091.16	DZANK1
390.036	-0.21976	0.125716	-1.74806	0.0804529	0.734361	ENSG00000089094.19	KDM2B
1.91136	-1.00682	1.73571	-0.580063	0.561872	NA	ENSG00000089101.18	CFAP61
134.706	0.0790179	0.2051	0.385265	0.700041	0.998927	ENSG00000089123.16	TASP1
11.8442	-0.291818	0.689697	-0.423111	0.672214	NA	ENSG00000089127.13	OAS1
2579.09	-0.0589736	0.068959	-0.855197	0.392442	0.998927	ENSG00000089154.11	GCN1
31957.6	0.0717366	0.0380172	1.88695	0.0591669	0.637006	ENSG00000089157.16	RPLP0
3344.12	-0.0271848	0.0638397	-0.425828	0.670233	0.998927	ENSG00000089159.16	PXN
21.8969	0.136994	0.515378	0.265812	0.790384	NA	ENSG00000089163.4	SIRT4
313.392	-0.0507057	0.140055	-0.362041	0.717321	0.998927	ENSG00000089177.18	KIF16B
958.058	0.0685051	0.0852907	0.803195	0.421862	0.998927	ENSG00000089195.15	TRMT6
20.8939	0.0770638	0.529714	0.145482	0.88433	NA	ENSG00000089199.10	CHGB
4224.64	0.0373395	0.0455911	0.819009	0.412781	0.998927	ENSG00000089220.5	PEBP1
550.826	-0.0860509	0.10323	-0.833583	0.404516	0.998927	ENSG00000089234.16	BRAP
900.862	0.0461957	0.0838813	0.550727	0.581821	0.998927	ENSG00000089248.7	ERP29
5875.48	0.0823451	0.040624	2.027	0.042662	0.542899	ENSG00000089280.18	FUS
605.337	0.0868749	0.10055	0.863995	0.387591	0.998927	ENSG00000089289.16	IGBP1
243.712	-0.0186571	0.154504	-0.120755	0.903885	0.998927	ENSG00000089327.14	FXYD5
321.063	-0.17197	0.13618	-1.26282	0.206656	0.996213	ENSG00000089335.21	ZNF302
224.368	-0.0354263	0.162949	-0.217408	0.827891	0.998927	ENSG00000089351.14	GRAMD1A
0.385161	-0.276474	4.02048	-0.0687664	0.945176	NA	ENSG00000089472.16	HEPH
36.7775	0.092032	0.390712	0.23555	0.813782	0.998927	ENSG00000089486.17	CDIP1
20.3056	-0.305654	0.519342	-0.588541	0.556169	NA	ENSG00000089505.17	CMTM1
3697.91	-0.0279351	0.0485785	-0.575051	0.565257	0.998927	ENSG00000089597.18	GANAB
59.0215	-0.08507	0.30965	-0.27473	0.783524	0.998927	ENSG00000089639.11	GMIP
201.987	-0.0656477	0.169334	-0.387681	0.698252	0.998927	ENSG00000089682.16	RBM41
3555.34	0.0100946	0.0469548	0.214986	0.829779	0.998927	ENSG00000089685.15	BIRC5
6.7436	1.03665	0.942021	1.10045	0.271136	NA	ENSG00000089692.9	LAG3
4569.88	0.0480625	0.045815	1.04906	0.294153	0.998927	ENSG00000089693.10	MLF2
12.7759	-0.437039	0.661683	-0.660496	0.508936	NA	ENSG00000089723.10	OTUB2
3427.83	0.0535188	0.0488894	1.09469	0.273652	0.998927	ENSG00000089737.17	DDX24
129.904	-0.614922	0.213773	-2.87652	0.0040209	0.116776	ENSG00000089775.11	ZBTB25
788.097	0.21253	0.0884662	2.40238	0.0162886	0.31121	ENSG00000089818.18	NECAP1
4.74909	-0.147687	1.0971	-0.134616	0.892916	NA	ENSG00000089820.15	ARHGAP4
4.57102	0.234029	1.10772	0.211272	0.832675	NA	ENSG00000089847.12	ANKRD24
638.789	0.0172766	0.101236	0.170656	0.864494	0.998927	ENSG00000089876.11	DHX32
975.831	-0.125416	0.0810024	-1.5483	0.12155	0.861732	ENSG00000089902.10	RCOR1
887.626	0.126929	0.0862262	1.47205	0.141007	0.915497	ENSG00000089916.17	GPATCH2L
24.7128	-0.136147	0.491009	-0.27728	0.781565	NA	ENSG00000090006.17	LTBP4
424.886	0.106037	0.121067	0.875853	0.38111	0.998927	ENSG00000090013.10	BLVRB
142.322	-0.0797901	0.207614	-0.384319	0.700742	0.998927	ENSG00000090020.11	SLC9A1
2259.64	-0.00475392	0.0606787	-0.0783457	0.937553	0.998927	ENSG00000090054.15	SPTLC1
6001.79	0.0299424	0.0425897	0.703042	0.482029	0.998927	ENSG00000090060.17	PAPOLA
591.993	0.0347634	0.106431	0.326627	0.74395	0.998927	ENSG00000090061.17	CCNK
566.068	-0.00664893	0.103548	-0.0642108	0.948802	0.998927	ENSG00000090097.21	PCBP4
19.8218	-0.472126	0.546902	-0.863274	0.387987	NA	ENSG00000090238.11	YPEL3
631.63	0.0347527	0.101493	0.342416	0.732038	0.998927	ENSG00000090263.16	MRPS33
1134.14	0.038	0.0783004	0.485311	0.627456	0.998927	ENSG00000090266.13	NDUFB2
1884.92	0.0962217	0.0599003	1.60636	0.108194	0.817582	ENSG00000090273.14	NUDC
764.256	0.067304	0.0891795	0.754702	0.450428	0.998927	ENSG00000090316.16	MAEA
2.88779	-0.989334	1.40417	-0.704569	0.481079	NA	ENSG00000090339.9	ICAM1
851.009	-0.00659088	0.0880046	-0.0748925	0.9403	0.998927	ENSG00000090372.15	STRN4
5.48287	-0.39881	0.993316	-0.401494	0.688056	NA	ENSG00000090382.6	LYZ
425.947	-0.207032	0.121864	-1.69888	0.089342	0.758043	ENSG00000090432.7	MUL1
232.643	0.0844514	0.156672	0.539033	0.589864	0.998927	ENSG00000090447.12	TFAP4
449.795	-0.0165782	0.114776	-0.14444	0.885153	0.998927	ENSG00000090470.15	PDCD7
692.375	-0.111722	0.0923707	-1.20949	0.226474	0.998927	ENSG00000090487.11	SPG21
1903.4	0.0996391	0.0609912	1.63366	0.102329	0.794875	ENSG00000090520.11	DNAJB11
52.6498	-0.314282	0.340148	-0.923957	0.355509	0.998927	ENSG00000090530.10	P3H2
0.829462	-0.311525	2.98002	-0.104538	0.916742	NA	ENSG00000090534.19	THPO
9.10185	-0.140305	0.772644	-0.18159	0.855904	NA	ENSG00000090539.15	CHRD
4.69668	-1.11205	1.13653	-0.978458	0.327848	NA	ENSG00000090554.13	FLT3LG
149.955	-0.0842084	0.194975	-0.431893	0.665819	0.998927	ENSG00000090565.16	RAB11FIP3
202.056	-0.0492583	0.169378	-0.290819	0.77119	0.998927	ENSG00000090581.10	GNPTG
409.055	-0.177424	0.12851	-1.38062	0.167396	0.94825	ENSG00000090612.21	ZNF268
1259.08	-0.0257384	0.0808938	-0.318175	0.750352	0.998927	ENSG00000090615.15	GOLGA3
3871.59	0.118851	0.0470681	2.52509	0.0115669	0.244201	ENSG00000090621.14	PABPC4
125.35	0.267795	0.219171	1.22185	0.221763	0.998927	ENSG00000090661.12	CERS4
78.2824	0.133146	0.276491	0.481558	0.63012	0.998927	ENSG00000090674.16	MCOLN1
626.831	-0.0480089	0.100417	-0.478097	0.632581	0.998927	ENSG00000090686.15	USP48
160.634	0.0552192	0.18742	0.294629	0.768278	0.998927	ENSG00000090776.6	EFNB1
2632.36	-0.0227168	0.0545083	-0.416759	0.676854	0.998927	ENSG00000090857.13	PDPR
2354.79	0.000594469	0.0593524	0.0100159	0.992009	0.998927	ENSG00000090861.15	AARS
2108.12	-0.0251052	0.0603439	-0.416036	0.677384	0.998927	ENSG00000090863.11	GLG1
3030.01	-0.0557055	0.0491328	-1.13377	0.256889	0.998927	ENSG00000090889.12	KIF4A
726.972	-0.156567	0.0939096	-1.6672	0.0954737	0.770803	ENSG00000090905.19	TNRC6A
158.629	-0.18975	0.19719	-0.962268	0.335915	0.998927	ENSG00000090924.15	PLEKHG2
21.5462	-0.1095	0.514738	-0.212729	0.831538	NA	ENSG00000090932.10	DLL3
211.977	-0.0313937	0.170023	-0.184644	0.853508	0.998927	ENSG00000090971.5	NAT14
96.5532	-0.324434	0.243544	-1.33213	0.182816	0.963913	ENSG00000090975.12	PITPNM2
353.123	0.00903561	0.138277	0.0653442	0.9479	0.998927	ENSG00000090989.18	EXOC1
2075.05	-0.12604	0.0586241	-2.14997	0.0315573	0.456544	ENSG00000091009.8	RBM27
1.22678	1.91724	2.38085	0.805276	0.42066	NA	ENSG00000091010.6	POU4F3
2263.7	-0.0705748	0.0583362	-1.20979	0.226358	0.998927	ENSG00000091039.17	OSBPL8
41.3937	-0.0999206	0.367567	-0.271843	0.785742	0.998927	ENSG00000091073.19	DTX2
3.18712	-0.0189081	1.29782	-0.0145691	0.988376	NA	ENSG00000091106.19	NLRC4
1443.08	0.0376768	0.0673289	0.559594	0.575756	0.998927	ENSG00000091127.14	PUS7
1.37826	-1.64206	2.1996	-0.746527	0.455349	NA	ENSG00000091128.13	LAMB4
0.614151	0.644721	3.14421	0.20505	0.837533	NA	ENSG00000091129.20	NRCAM
26.8475	0.0189293	0.457056	0.0414156	0.966965	NA	ENSG00000091136.14	LAMB1
3.44193	0.883141	1.34222	0.657973	0.510556	NA	ENSG00000091137.12	SLC26A4
0.749937	-1.86156	2.77666	-0.670432	0.502583	NA	ENSG00000091138.12	SLC26A3
2634.43	0.0375805	0.0614914	0.611151	0.5411	0.998927	ENSG00000091140.14	DLD
299.474	-0.0029142	0.139246	-0.0209284	0.983303	0.998927	ENSG00000091157.13	WDR7
2047.31	0.192617	0.0740277	2.60196	0.0092692	0.210555	ENSG00000091164.13	TXNL1
3.02693	0.604474	1.38025	0.437944	0.661427	NA	ENSG00000091262.15	ABCC6
2759.68	-0.00719135	0.0543352	-0.132352	0.894706	0.998927	ENSG00000091317.8	CMTM6
421.356	-0.0193866	0.126908	-0.152762	0.878586	0.998927	ENSG00000091409.15	ITGA6
17.9821	-0.176845	0.587254	-0.30114	0.763308	NA	ENSG00000091428.18	RAPGEF4
1386.46	-0.0266705	0.0694213	-0.384183	0.700843	0.998927	ENSG00000091436.17	MAP3K20
1806.43	0.0361823	0.0698703	0.51785	0.604563	0.998927	ENSG00000091483.6	FH
164.481	-0.130264	0.185553	-0.70203	0.48266	0.998927	ENSG00000091490.11	SEL1L3
4.6939	-0.408452	1.09674	-0.372422	0.709579	NA	ENSG00000091513.16	TF
6289.9	0.110863	0.0390985	2.83549	0.00457557	0.126888	ENSG00000091527.15	CDV3
1.13337	-1.40461	2.6337	-0.53332	0.593812	NA	ENSG00000091536.18	MYO15A
1046.54	0.00789727	0.0910209	0.0867633	0.93086	0.998927	ENSG00000091542.9	ALKBH5
2.57891	-0.176626	1.47692	-0.119591	0.904807	NA	ENSG00000091592.16	NLRP1
15.3398	-0.117375	0.621887	-0.18874	0.850296	NA	ENSG00000091622.16	PITPNM3
449.732	0.12997	0.119729	1.08554	0.277682	0.998927	ENSG00000091640.8	SPAG7
1430.79	0.307963	0.0700934	4.39362	1.11481e-05	0.000971299	ENSG00000091651.9	ORC6
0.793187	-0.354228	2.77595	-0.127606	0.898461	NA	ENSG00000091656.17	ZFHX4
1.59776	1.18225	2.20416	0.536374	0.5917	NA	ENSG00000091704.10	CPA1
639.879	-0.0700828	0.0960116	-0.729941	0.465426	0.998927	ENSG00000091732.16	ZC3HC1
11.1796	-0.639909	0.729706	-0.876941	0.380518	NA	ENSG00000091844.8	RGS17
1.22007	1.9231	2.35866	0.815335	0.414881	NA	ENSG00000091879.13	ANGPT2
346.436	-0.0198297	0.128376	-0.154466	0.877243	0.998927	ENSG00000091947.10	TMEM101
10.0739	-0.213763	0.763825	-0.279859	0.779585	NA	ENSG00000091972.18	CD200
471.273	-0.0394551	0.112702	-0.350082	0.726277	0.998927	ENSG00000091986.15	CCDC80
908.1	0.0670228	0.0830435	0.807081	0.41962	0.998927	ENSG00000092010.15	PSME1
311.384	0.0325247	0.139342	0.233417	0.815438	0.998927	ENSG00000092020.10	PPP2R3C
355.5	-0.0467745	0.132122	-0.354026	0.72332	0.998927	ENSG00000092036.18	HAUS4
0.404777	2.00898	3.90871	0.513975	0.60727	NA	ENSG00000092051.17	JPH4
0.414731	-0.291598	3.91503	-0.0744818	0.940627	NA	ENSG00000092068.20	SLC7A8
214.686	-0.0142893	0.167163	-0.0854816	0.931879	0.998927	ENSG00000092094.11	OSGEP
40.2737	-0.122115	0.396636	-0.307877	0.758176	0.998927	ENSG00000092096.16	SLC22A17
212.885	0.00541411	0.186807	0.0289824	0.976879	0.998927	ENSG00000092098.17	RNF31
1103.65	0.0299821	0.0773975	0.387378	0.698476	0.998927	ENSG00000092108.20	SCFD1
980.189	-0.0784173	0.0830134	-0.944634	0.344846	0.998927	ENSG00000092140.16	G2E3
2115.91	-0.129578	0.0580906	-2.23062	0.0257063	0.400696	ENSG00000092148.13	HECTD1
15931.8	0.042004	0.0383109	1.0964	0.272904	0.998927	ENSG00000092199.17	HNRNPC
4.0054	-0.367378	1.22936	-0.298838	0.765064	NA	ENSG00000092200.12	RPGRIP1
7007.44	-0.0341939	0.0452491	-0.755683	0.449839	0.998927	ENSG00000092201.10	SUPT16H
1014.4	0.044221	0.0792267	0.558158	0.576736	0.998927	ENSG00000092203.14	TOX4
261.034	0.0381674	0.150129	0.25423	0.799318	0.998927	ENSG00000092208.17	GEMIN2
0.588027	0.553106	3.4693	0.159429	0.873331	NA	ENSG00000092295.12	TGM1
148.33	-0.167967	0.208412	-0.805939	0.420278	0.998927	ENSG00000092330.17	TINF2
8.828	0.552497	0.831732	0.664272	0.506516	NA	ENSG00000092421.16	SEMA6A
944.509	-0.0331323	0.0823051	-0.402555	0.687276	0.998927	ENSG00000092439.15	TRPM7
283.11	-0.0420744	0.144551	-0.291069	0.770999	0.998927	ENSG00000092445.12	TYRO3
799.936	-0.0542879	0.0877489	-0.618673	0.536132	0.998927	ENSG00000092470.12	WDR76
743.126	-0.0317167	0.0981953	-0.322996	0.746698	0.998927	ENSG00000092531.10	SNAP23
1106.72	0.0662813	0.0754781	0.878153	0.379861	0.998927	ENSG00000092621.12	PHGDH
1.07635	1.66873	2.64588	0.630691	0.528243	NA	ENSG00000092758.17	COL9A3
11923.7	0.10464	0.0336324	3.11128	0.00186276	0.0679617	ENSG00000092820.18	EZR
4927.71	0.109551	0.0503915	2.174	0.0297049	0.437333	ENSG00000092841.18	MYL6
1168.45	-0.0401658	0.0755355	-0.531748	0.5949	0.998927	ENSG00000092847.12	AGO1
0.367267	-2.24296	3.95796	-0.566694	0.570922	NA	ENSG00000092850.12	TEKT2
2479.43	0.0172541	0.0570358	0.302513	0.762261	0.998927	ENSG00000092853.14	CLSPN
757.646	0.0074767	0.0927957	0.0805716	0.935783	0.998927	ENSG00000092871.16	RFFL
2.9964	0.203059	1.35072	0.150334	0.880501	NA	ENSG00000092929.11	UNC13D
158.683	0.101042	0.196269	0.514816	0.606682	0.998927	ENSG00000092931.11	MFSD11
4081.18	-0.0726345	0.0474492	-1.53078	0.125823	0.873872	ENSG00000092964.18	DPYSL2
529.49	-0.169452	0.105857	-1.60077	0.109428	0.820005	ENSG00000092969.12	TGFB2
369.057	-0.0697029	0.126975	-0.548949	0.58304	0.998927	ENSG00000092978.11	GPATCH2
1994.17	-0.013772	0.0594088	-0.231817	0.81668	0.998927	ENSG00000093000.19	NUP50
983.034	0.0694843	0.0794803	0.874233	0.381991	0.998927	ENSG00000093009.9	CDC45
610.757	0.121723	0.102014	1.19319	0.232794	0.998927	ENSG00000093010.13	COMT
1.00276	0.184531	2.53518	0.0727882	0.941975	NA	ENSG00000093072.17	ADA2
25.4909	-0.110359	0.469434	-0.235089	0.81414	NA	ENSG00000093100.13	AC016026.1
1217.9	0.0321257	0.0823834	0.389953	0.696571	0.998927	ENSG00000093144.19	ECHDC1
526.453	0.0588528	0.105748	0.556538	0.577843	0.998927	ENSG00000093167.18	LRRFIP2
742.651	0.00937285	0.0922453	0.101608	0.919068	0.998927	ENSG00000093183.14	SEC22C
84.9828	-0.165271	0.257467	-0.641909	0.520932	0.998927	ENSG00000093217.10	XYLB
276.175	0.113558	0.153691	0.73887	0.459986	0.998927	ENSG00000094631.19	HDAC6
2494.64	0.128528	0.0572182	2.24627	0.0246866	0.392665	ENSG00000094804.11	CDC6
108.579	0.0380803	0.233348	0.163191	0.870368	0.998927	ENSG00000094841.14	UPRT
1918.07	0.0554459	0.0619058	0.895649	0.37044	0.998927	ENSG00000094880.11	CDC23
395.183	0.126832	0.12255	1.03494	0.300697	0.998927	ENSG00000094914.13	AAAS
2066.17	-0.0989828	0.0589873	-1.67804	0.0933402	0.769857	ENSG00000094916.16	CBX5
845.384	0.177421	0.0930599	1.90653	0.0565821	0.629738	ENSG00000094975.14	SUCO
3382.14	0.0273533	0.0580659	0.471073	0.637589	0.998927	ENSG00000095002.14	MSH2
383.446	-0.214488	0.128072	-1.67474	0.093985	0.770017	ENSG00000095015.6	MAP3K1
289.313	-0.0625843	0.148595	-0.421174	0.673628	0.998927	ENSG00000095059.16	DHPS
34.1726	0.0808102	0.427168	0.189176	0.849955	0.998927	ENSG00000095066.11	HOOK2
3489.03	0.017246	0.0471605	0.365686	0.714599	0.998927	ENSG00000095139.14	ARCN1
34.7328	-0.408891	0.411595	-0.99343	0.320501	0.998927	ENSG00000095203.14	EPB41L4B
488.627	0.00113499	0.116158	0.00977104	0.992204	0.998927	ENSG00000095209.12	TMEM38B
1881.17	-0.0718648	0.0599216	-1.19931	0.230406	0.998927	ENSG00000095261.14	PSMD5
2466.11	0.000296466	0.0593116	0.00499845	0.996012	0.999026	ENSG00000095319.14	NUP188
632.148	-0.0496849	0.109958	-0.451854	0.651374	0.998927	ENSG00000095321.17	CRAT
0.608411	2.59598	3.3562	0.773489	0.439233	NA	ENSG00000095370.20	SH2D3C
1004.08	0.076317	0.0858004	0.889471	0.37375	0.998927	ENSG00000095380.11	NANS
425.617	-0.0797793	0.126515	-0.630591	0.528308	0.998927	ENSG00000095383.20	TBC1D2
114.626	0.013176	0.228913	0.0575593	0.9541	0.998927	ENSG00000095397.14	WHRN
0.553008	-2.83281	3.33763	-0.848751	0.39602	NA	ENSG00000095464.9	PDE6C
1018.35	0.0291339	0.0814069	0.35788	0.720433	0.998927	ENSG00000095485.18	CWF19L1
11.8483	0.164899	0.700206	0.235501	0.81382	NA	ENSG00000095539.15	SEMA4G
1752.02	0.00387116	0.064646	0.0598824	0.952249	0.998927	ENSG00000095564.14	BTAF1
409.802	0.143929	0.120325	1.19618	0.231628	0.998927	ENSG00000095574.11	IKZF5
3.23113	0.00972176	1.35656	0.0071665	0.994282	NA	ENSG00000095587.9	TLL2
4.21102	0.041458	1.13589	0.0364982	0.970885	NA	ENSG00000095596.12	CYP26A1
23.2346	0.271342	0.499824	0.542876	0.587215	NA	ENSG00000095637.22	SORBS1
8.06262	1.18222	0.880339	1.34292	0.179298	NA	ENSG00000095739.11	BAMBI
5.86295	0.544939	0.989411	0.550771	0.581791	NA	ENSG00000095752.7	IL11
2434.2	0.0239657	0.053956	0.444171	0.656919	0.998927	ENSG00000095787.22	WAC
185.78	0.210098	0.184321	1.13985	0.25435	0.998927	ENSG00000095794.19	CREM
261.699	0.0504078	0.158891	0.317247	0.751056	0.998927	ENSG00000095906.17	NUBP2
256.567	-0.0642594	0.151016	-0.425513	0.670463	0.998927	ENSG00000095951.17	HIVEP1
1911.03	-0.0320833	0.0614237	-0.522327	0.601443	0.998927	ENSG00000096060.14	FKBP5
4805.05	0.00805684	0.0495512	0.162596	0.870837	0.998927	ENSG00000096063.16	SRPK1
652.38	0.0407196	0.104395	0.390053	0.696497	0.998927	ENSG00000096070.19	BRPF3
484.207	0.0803728	0.112269	0.715898	0.474054	0.998927	ENSG00000096080.11	MRPS18A
326.087	-0.0832256	0.146088	-0.569694	0.568885	0.998927	ENSG00000096092.6	TMEM14A
305.469	-0.0688582	0.137903	-0.499323	0.617552	0.998927	ENSG00000096093.16	EFHC1
61567.1	0.0703643	0.02882	2.44151	0.0146258	0.293397	ENSG00000096384.20	HSP90AB1
2399.87	0.0549605	0.057206	0.960746	0.33668	0.998927	ENSG00000096401.8	CDC5L
673.625	0.0481395	0.10145	0.474513	0.635134	0.998927	ENSG00000096433.11	ITPR3
203.673	0.462014	0.174205	2.65213	0.00799854	0.190578	ENSG00000096654.15	ZNF184
568.085	-0.139799	0.104476	-1.3381	0.180865	0.96157	ENSG00000096696.14	DSP
708.867	0.0542409	0.0953755	0.568709	0.569554	0.998927	ENSG00000096717.12	SIRT1
4917.28	0.0105281	0.0479073	0.21976	0.826058	0.998927	ENSG00000096746.17	HNRNPH3
358.05	0.0345075	0.128048	0.269488	0.787554	0.998927	ENSG00000096872.16	IFT74
156.068	0.0283169	0.191	0.148256	0.882141	0.998927	ENSG00000096968.13	JAK2
842.419	-0.0303753	0.088241	-0.344231	0.730672	0.998927	ENSG00000097007.18	ABL1
1925.92	0.0424804	0.065054	0.653002	0.513755	0.998927	ENSG00000097021.19	ACOT7
1001.95	-0.0599767	0.0785863	-0.763196	0.445346	0.998927	ENSG00000097033.14	SH3GLB1
618.899	0.024607	0.0995924	0.247077	0.804849	0.998927	ENSG00000097046.13	CDC7
96.9122	-0.44218	0.256288	-1.72533	0.0844684	0.745404	ENSG00000097096.9	SYDE2
0.432625	2.0869	3.81929	0.546412	0.584783	NA	ENSG00000099139.13	PCSK5
9162.45	0.0311348	0.0358277	0.869014	0.38484	0.998927	ENSG00000099194.6	SCD
217.682	0.0736285	0.170169	0.432679	0.665248	0.998927	ENSG00000099203.7	TMED1
564.253	-0.0939081	0.111092	-0.845315	0.397935	0.998927	ENSG00000099204.20	ABLIM1
838.2	-0.0667113	0.0874499	-0.762851	0.445552	0.998927	ENSG00000099219.14	ERMP1
1065.68	0.025379	0.0795891	0.318876	0.749821	0.998927	ENSG00000099246.16	RAB18
8.21671	-0.672121	0.830175	-0.809614	0.418162	NA	ENSG00000099250.18	NRP1
2.08322	-2.53944	1.7898	-1.41884	0.155946	NA	ENSG00000099251.14	HSD17B7P2
414.161	0.0381759	0.120305	0.317326	0.750996	0.998927	ENSG00000099256.19	PRTFDC1
43.86	-0.352575	0.366223	-0.962735	0.33568	0.998927	ENSG00000099282.10	TSPAN15
364.821	-0.0691744	0.130463	-0.530224	0.595956	0.998927	ENSG00000099284.14	H2AFY2
1320.44	-0.0674421	0.0802085	-0.840835	0.40044	0.998927	ENSG00000099290.17	WASHC2A
74.1876	0.0809115	0.280598	0.288354	0.773076	0.998927	ENSG00000099308.10	MAST3
80.9859	-0.079216	0.267607	-0.296016	0.767218	0.998927	ENSG00000099326.8	MZF1
33.6399	-0.314834	0.406101	-0.775259	0.438187	0.998927	ENSG00000099330.9	OCEL1
770.484	-0.0411406	0.111005	-0.370618	0.710922	0.998927	ENSG00000099331.13	MYO9B
40.3036	0.137589	0.39311	0.350002	0.726337	0.998927	ENSG00000099337.5	KCNK6
5.3667	0.14499	1.0052	0.144239	0.885311	NA	ENSG00000099338.23	CATSPERG
3347.31	0.0443052	0.0517861	0.855542	0.392251	0.998927	ENSG00000099341.11	PSMD8
308.849	-0.231909	0.144759	-1.60204	0.109147	0.820005	ENSG00000099364.16	FBXL19
23.9271	-0.440932	0.484036	-0.910948	0.362323	NA	ENSG00000099365.11	STX1B
197.993	-0.0163512	0.171996	-0.0950671	0.924262	0.998927	ENSG00000099377.14	HSD3B7
440.067	-0.0921627	0.136892	-0.673252	0.500787	0.998927	ENSG00000099381.18	SETD1A
883.61	0.0256196	0.085566	0.299414	0.764624	0.998927	ENSG00000099385.11	BCL7C
27.0001	-0.243831	0.455886	-0.534851	0.592753	NA	ENSG00000099617.4	EFNA2
2572.35	-0.0524688	0.0554938	-0.945491	0.344408	0.998927	ENSG00000099622.14	CIRBP
429.831	-0.016924	0.128502	-0.131702	0.89522	0.998927	ENSG00000099624.8	ATP5F1D
35.554	-0.202158	0.41484	-0.487315	0.626035	0.998927	ENSG00000099625.13	CBARP
1.4394	0.0881396	2.05037	0.0429873	0.965712	NA	ENSG00000099769.5	IGFALS
5700.6	0.0228773	0.0404292	0.565861	0.571488	0.998927	ENSG00000099783.12	HNRNPM
101.552	0.223413	0.24388	0.916079	0.359625	0.998927	ENSG00000099785.10	2002-03-01
615.325	-0.0241602	0.103333	-0.233808	0.815134	0.998927	ENSG00000099795.7	NDUFB7
708.007	0.0238332	0.0981672	0.242781	0.808175	0.998927	ENSG00000099797.15	TECR
593.906	0.0482632	0.108624	0.444313	0.656816	0.998927	ENSG00000099800.8	TIMM13
596.41	0.113201	0.105326	1.07477	0.282478	0.998927	ENSG00000099804.9	CDC34
9.08625	-0.381001	0.774402	-0.491994	0.622724	NA	ENSG00000099812.9	MISP
412.893	-0.0755172	0.128433	-0.587989	0.556539	0.998927	ENSG00000099814.16	CEP170B
1591.82	0.0227948	0.0659563	0.345605	0.72964	0.998927	ENSG00000099817.12	POLR2E
289.696	-0.108504	0.158966	-0.682563	0.494883	0.998927	ENSG00000099821.14	POLRMT
132.722	0.0396045	0.214604	0.184547	0.853584	0.998927	ENSG00000099822.3	HCN2
9.28271	-0.557149	0.79499	-0.700825	0.483413	NA	ENSG00000099834.18	CDHR5
6.4686	0.540973	0.987787	0.547662	0.583924	NA	ENSG00000099840.13	IZUMO4
57.7621	0.0534217	0.323586	0.165093	0.868871	0.998927	ENSG00000099849.15	RASSF7
597.693	0.360588	0.103731	3.47616	0.000508643	0.0259319	ENSG00000099860.9	GADD45B
338.747	0.0418989	0.134095	0.312457	0.754693	0.998927	ENSG00000099864.18	PALM
4.61408	0.260247	1.0967	0.237299	0.812425	NA	ENSG00000099866.15	MADCAM1
1.2596	0.659048	2.36169	0.279058	0.7802	NA	ENSG00000099869.7	IGF2-AS
1068.02	0.11308	0.0873127	1.29511	0.195281	0.98272	ENSG00000099875.14	MKNK2
25.1478	-0.147979	0.484904	-0.305172	0.760235	NA	ENSG00000099889.14	ARVCF
258.432	-0.0330682	0.149244	-0.221571	0.824648	0.998927	ENSG00000099899.15	TRMT2A
4855.15	0.0966823	0.0486243	1.98836	0.0467723	0.5712	ENSG00000099901.17	RANBP1
129.479	-0.128285	0.21668	-0.592047	0.553819	0.998927	ENSG00000099904.15	ZDHHC8
123.946	0.00844207	0.2194	0.038478	0.969307	0.998927	ENSG00000099910.17	KLHL22
441.704	-0.0885527	0.126561	-0.699684	0.484125	0.998927	ENSG00000099917.17	MED15
0.920275	-3.56784	2.70345	-1.31974	0.186923	NA	ENSG00000099937.11	SERPIND1
661.968	0.0212228	0.0980012	0.216556	0.828554	0.998927	ENSG00000099940.12	SNAP29
1901.54	0.0901992	0.0619502	1.45599	0.145394	0.920042	ENSG00000099942.13	CRKL
267.425	-0.0873195	0.147439	-0.592242	0.553688	0.998927	ENSG00000099949.20	LZTR1
62.7175	-0.115554	0.313477	-0.368621	0.71241	0.998927	ENSG00000099953.10	MMP11
128.912	-0.0862882	0.208727	-0.413401	0.679313	0.998927	ENSG00000099954.18	CECR2
1426.07	0.0254358	0.0683976	0.371881	0.709981	0.998927	ENSG00000099956.19	SMARCB1
35.1904	-0.0668755	0.407954	-0.163929	0.869787	0.998927	ENSG00000099957.16	P2RX6
0.659124	2.69057	3.27326	0.821986	0.411085	NA	ENSG00000099958.14	DERL3
0.60592	2.59106	3.36057	0.77102	0.440695	NA	ENSG00000099960.13	SLC7A4
1764.63	0.0404676	0.0713289	0.567338	0.570485	0.998927	ENSG00000099968.17	BCL2L13
97.6288	0.0388012	0.259948	0.149265	0.881344	0.998927	ENSG00000099974.8	DDTL
770.169	0.000680785	0.0897111	0.00758864	0.993945	0.998927	ENSG00000099977.14	DDT
551.431	-0.0163225	0.125095	-0.130481	0.896186	0.998927	ENSG00000099991.18	CABIN1
186.624	0.255446	0.1769	1.44401	0.148735	0.924153	ENSG00000099992.15	TBC1D10A
4.84987	-0.746442	1.07787	-0.692516	0.488613	NA	ENSG00000099994.11	SUSD2
1431.97	-0.0443573	0.0735718	-0.602911	0.546568	0.998927	ENSG00000099995.19	SF3A1
0.588027	0.553106	3.4693	0.159429	0.873331	NA	ENSG00000099998.17	GGT5
128.153	-0.035045	0.212046	-0.165271	0.86873	0.998927	ENSG00000099999.14	RNF215
322.895	0.197208	0.141876	1.39	0.164527	0.944375	ENSG00000100003.18	SEC14L2
961.973	0.0652285	0.0801188	0.814146	0.415561	0.998927	ENSG00000100014.20	SPECC1L
264.522	0.00436017	0.163614	0.0266491	0.97874	0.998927	ENSG00000100023.19	PPIL2
0.77875	-0.435187	3.04051	-0.143129	0.886188	NA	ENSG00000100024.14	UPB1
55.2768	-0.0263103	0.327216	-0.0804064	0.935914	0.998927	ENSG00000100027.15	YPEL1
1418.71	-0.00685151	0.0903032	-0.0758723	0.939521	0.998927	ENSG00000100028.12	SNRPD3
1958.69	0.0623961	0.0598259	1.04296	0.296966	0.998927	ENSG00000100029.18	PES1
2922.96	-0.0172766	0.0511157	-0.33799	0.735371	0.998927	ENSG00000100030.14	MAPK1
41.9366	0.0772761	0.45414	0.170159	0.864885	0.998927	ENSG00000100031.19	GGT1
14.0793	0.465202	0.644941	0.721309	0.470719	NA	ENSG00000100033.16	PRODH
955.406	0.0182638	0.0810193	0.225425	0.821649	0.998927	ENSG00000100034.14	PPM1F
61.5662	0.506563	0.31637	1.60117	0.109339	0.820005	ENSG00000100036.13	SLC35E4
281.823	-0.10254	0.154882	-0.662048	0.50794	0.998927	ENSG00000100038.19	TOP3B
0.548794	-2.82302	3.34688	-0.843478	0.398961	NA	ENSG00000100053.10	CRYBB3
0.385161	-0.276474	4.02048	-0.0687664	0.945176	NA	ENSG00000100055.21	CYTH4
252.605	0.129597	0.152362	0.850584	0.395001	0.998927	ENSG00000100056.12	ESS2
101.436	0.0310151	0.252146	0.123004	0.902104	0.998927	ENSG00000100058.12	CRYBB2P1
40.8194	-0.48532	0.390592	-1.24252	0.214043	0.998927	ENSG00000100065.15	CARD10
33.4996	-0.167112	0.429706	-0.388898	0.697352	0.998927	ENSG00000100068.12	LRP5L
668.492	-0.0748103	0.0940095	-0.795773	0.426164	0.998927	ENSG00000100075.10	SLC25A1
172.845	-0.0472927	0.197862	-0.239018	0.811092	0.998927	ENSG00000100077.15	GRK3
0.414731	-0.291598	3.91503	-0.0744818	0.940627	NA	ENSG00000100079.7	LGALS2
316.068	0.110597	0.139152	0.794798	0.426731	0.998927	ENSG00000100083.19	GGA1
711.762	0.0710586	0.0953152	0.745511	0.455963	0.998927	ENSG00000100084.14	HIRA
81.8207	0.251038	0.271171	0.925756	0.354573	0.998927	ENSG00000100092.22	SH3BP1
4716.35	0.0572352	0.0537224	1.06539	0.2867	0.998927	ENSG00000100097.12	LGALS1
330.821	-0.0566226	0.137293	-0.412423	0.680029	0.998927	ENSG00000100099.20	HPS4
4.34804	0.137875	1.17254	0.117587	0.906395	NA	ENSG00000100100.12	PIK3IP1
231.043	0.0552811	0.164667	0.335714	0.737087	0.998927	ENSG00000100104.13	SRRD
295.135	-0.166313	0.139838	-1.18932	0.234312	0.998927	ENSG00000100105.18	PATZ1
332.321	-0.144551	0.132565	-1.09042	0.27553	0.998927	ENSG00000100106.21	TRIOBP
358.494	0.0577007	0.133556	0.432035	0.665716	0.998927	ENSG00000100109.17	TFIP11
229.111	0.150761	0.161984	0.930719	0.351999	0.998927	ENSG00000100116.16	GCAT
226.522	-0.154995	0.16701	-0.928058	0.353377	0.998927	ENSG00000100124.15	ANKRD54
4217.53	0.00886118	0.0544686	0.162684	0.870767	0.998927	ENSG00000100129.18	EIF3L
1842.85	0.0505532	0.0639875	0.790048	0.4295	0.998927	ENSG00000100138.15	SNU13
233.645	0.0269612	0.157551	0.171127	0.864124	0.998927	ENSG00000100139.13	MICALL1
848.035	0.0402107	0.09253	0.43457	0.663875	0.998927	ENSG00000100142.15	POLR2F
2.20474	-0.0950716	1.59702	-0.0595307	0.952529	NA	ENSG00000100146.17	SOX10
78.7106	-0.216347	0.268593	-0.805483	0.420541	0.998927	ENSG00000100147.13	CCDC134
90.4979	-0.261232	0.248141	-1.05275	0.292454	0.998927	ENSG00000100150.18	DEPDC5
89.6392	-0.277981	0.251417	-1.10566	0.268875	0.998927	ENSG00000100151.16	PICK1
125.627	-0.223622	0.223676	-0.999759	0.317427	0.998927	ENSG00000100154.14	TTC28
1.43194	0.962381	2.23118	0.431334	0.666226	NA	ENSG00000100156.10	SLC16A8
283.972	-0.166193	0.14739	-1.12757	0.259503	0.998927	ENSG00000100162.15	CENPM
87.1979	0.102755	0.254098	0.404393	0.685924	0.998927	ENSG00000100167.20	2003-09-01
2.80492	0.924177	1.45039	0.637192	0.523999	NA	ENSG00000100181.22	TPTEP1
264.007	0.0559401	0.14786	0.378332	0.705184	0.998927	ENSG00000100196.11	KDELR3
2.43469	0.621636	1.4964	0.41542	0.677834	NA	ENSG00000100197.22	CYP2D6
4052.19	-0.160535	0.0473022	-3.39382	0.000689255	0.0325791	ENSG00000100201.21	DDX17
62.8385	-0.0517531	0.299334	-0.172894	0.862734	0.998927	ENSG00000100206.10	DMC1
848.32	-0.173942	0.0895809	-1.94173	0.0521694	0.603048	ENSG00000100207.18	TCF20
107.578	0.190297	0.229627	0.828724	0.40726	0.998927	ENSG00000100209.10	HSCB
352.207	-0.0952235	0.13047	-0.729848	0.465483	0.998927	ENSG00000100211.10	CBY1
1834.8	0.0887884	0.0635976	1.3961	0.162685	0.942395	ENSG00000100216.6	TOMM22
2.37355	-0.388579	1.48654	-0.261399	0.793785	NA	ENSG00000100218.11	RSPH14
1319.08	0.418137	0.0770035	5.43009	5.63241e-08	7.55843e-06	ENSG00000100219.16	XBP1
1755.68	0.0636359	0.0622527	1.02222	0.306677	0.998927	ENSG00000100220.12	RTCB
773.865	0.246954	0.0883548	2.79503	0.00518944	0.139529	ENSG00000100221.10	JOSD1
1082.44	0.116103	0.0768931	1.50993	0.131062	0.88742	ENSG00000100225.18	FBXO7
713.185	0.100197	0.0951777	1.05273	0.292463	0.998927	ENSG00000100226.16	GTPBP1
952.86	-0.0134058	0.0807463	-0.166024	0.868138	0.998927	ENSG00000100227.18	POLDIP3
90.1091	0.263031	0.25692	1.02379	0.305936	0.998927	ENSG00000100228.12	RAB36
3.66472	0.626705	1.23566	0.507184	0.612026	NA	ENSG00000100234.11	TIMP3
459.598	0.0171972	0.121276	0.141803	0.887236	0.998927	ENSG00000100239.16	PPP6R2
391.385	-0.167984	0.126721	-1.32562	0.184967	0.966049	ENSG00000100241.21	SBF1
380.257	-0.0152121	0.129546	-0.117426	0.906523	0.998927	ENSG00000100242.15	SUN2
702.364	-0.00471665	0.0973394	-0.0484558	0.961353	0.998927	ENSG00000100243.21	CYB5R3
87.6748	0.177503	0.267081	0.664601	0.506306	0.998927	ENSG00000100246.13	DNAL4
270.754	-0.0114441	0.153541	-0.0745347	0.940585	0.998927	ENSG00000100258.18	LMF2
108.044	0.0248724	0.229242	0.108498	0.9136	0.998927	ENSG00000100263.14	RHBDD3
827.794	-0.014724	0.0923824	-0.159381	0.873369	0.998927	ENSG00000100266.19	PACSIN2
41.0644	0.03957	0.379189	0.104354	0.916888	0.998927	ENSG00000100271.17	TTLL1
19.9492	-0.302964	0.525891	-0.576097	0.56455	NA	ENSG00000100276.10	RASL10A
887.912	-0.0256326	0.0937323	-0.273466	0.784495	0.998927	ENSG00000100280.16	AP1B1
691.579	0.0499497	0.0941314	0.530638	0.595669	0.998927	ENSG00000100281.14	HMGXB4
110.7	0.186171	0.243322	0.765122	0.444199	0.998927	ENSG00000100284.21	TOM1
1.54036	-1.96621	2.03798	-0.964781	0.334655	NA	ENSG00000100285.9	NEFH
50.575	-0.065981	0.340974	-0.193507	0.846562	0.998927	ENSG00000100288.19	CHKB
9.48424	0.328564	0.813261	0.404008	0.686207	NA	ENSG00000100290.3	BIK
250.764	1.68104	0.170622	9.8524	6.69243e-23	4.59613e-20	ENSG00000100292.17	HMOX1
187.092	0.00315487	0.174244	0.0181061	0.985554	0.998927	ENSG00000100294.12	MCAT
967.655	-0.0322386	0.0895724	-0.359917	0.718909	0.998927	ENSG00000100296.13	THOC5
1634.63	0.00793307	0.0706649	0.112263	0.910615	0.998927	ENSG00000100297.16	MCM5
27.4714	-0.0066489	0.450038	-0.0147741	0.988212	NA	ENSG00000100298.15	APOBEC3H
28.7939	-0.299801	0.483158	-0.620503	0.534927	NA	ENSG00000100299.18	ARSA
655.055	0.110815	0.0984555	1.12553	0.260364	0.998927	ENSG00000100300.18	TSPO
2.18236	-1.15033	1.70928	-0.672991	0.500953	NA	ENSG00000100302.7	RASD2
1200.62	-0.00248945	0.0757785	-0.0328517	0.973793	0.998927	ENSG00000100304.13	TTLL12
303.401	0.0702852	0.144615	0.486015	0.626956	0.998927	ENSG00000100307.13	CBX7
103.556	-0.792219	0.234287	-3.38141	0.00072115	0.0335435	ENSG00000100311.16	PDGFB
2.11402	-1.19656	1.60965	-0.743366	0.45726	NA	ENSG00000100314.4	CABP7
19126.9	0.0847626	0.0353566	2.39737	0.0165134	0.312115	ENSG00000100316.16	RPL3
90.4188	-0.0454794	0.259486	-0.175267	0.86087	0.998927	ENSG00000100319.12	ZMAT5
1357.21	-0.0590978	0.0713537	-0.828237	0.407536	0.998927	ENSG00000100320.23	RBFOX2
110.562	-0.045243	0.233567	-0.193705	0.846407	0.998927	ENSG00000100321.15	SYNGR1
216.146	-0.00535148	0.162834	-0.0328646	0.973783	0.998927	ENSG00000100324.14	TAB1
466.009	0.12627	0.115725	1.09111	0.275222	0.998927	ENSG00000100325.15	ASCC2
395.914	0.0349911	0.124627	0.280765	0.77889	0.998927	ENSG00000100330.15	MTMR3
683.35	-0.0663028	0.0961587	-0.689514	0.4905	0.998927	ENSG00000100335.15	MIEF1
45.0584	-0.308387	0.351964	-0.876188	0.380928	0.998927	ENSG00000100342.20	APOL1
46.8225	0.118346	0.354247	0.334078	0.738321	0.998927	ENSG00000100344.10	PNPLA3
4441.25	-0.00101255	0.0564827	-0.0179267	0.985697	0.998927	ENSG00000100345.21	MYH9
1.58312	0.347073	1.94818	0.178153	0.858603	NA	ENSG00000100346.17	CACNA1I
857.811	-0.0186925	0.0898899	-0.207949	0.835269	0.998927	ENSG00000100347.15	SAMM50
645.509	-0.0271902	0.100187	-0.271395	0.786087	0.998927	ENSG00000100348.10	TXN2
377.538	-0.0893297	0.123742	-0.721901	0.470355	0.998927	ENSG00000100350.14	FOXRED2
3246.69	0.0521682	0.0479203	1.08864	0.276311	0.998927	ENSG00000100353.18	EIF3D
621.39	-0.206165	0.0975236	-2.114	0.034515	0.483749	ENSG00000100354.21	TNRC6B
170.524	-0.0445209	0.1956	-0.227613	0.819947	0.998927	ENSG00000100359.21	SGSM3
168.097	-0.270297	0.184527	-1.46481	0.142974	0.916087	ENSG00000100360.15	IFT27
397.217	-0.132225	0.121508	-1.0882	0.276508	0.998927	ENSG00000100364.18	KIAA0930
896.782	0.0749209	0.087553	0.855721	0.392152	0.998927	ENSG00000100372.15	SLC25A17
205.296	0.360637	0.173862	2.07428	0.0380535	0.51302	ENSG00000100376.12	FAM118A
88.7484	0.0424522	0.258464	0.164248	0.869536	0.998927	ENSG00000100379.17	KCTD17
4984.57	0.0177486	0.0452037	0.392636	0.694589	0.998927	ENSG00000100380.14	ST13
0.590518	0.563646	3.17907	0.177299	0.859273	NA	ENSG00000100385.14	IL2RB
728.228	0.0242345	0.105306	0.230134	0.817987	0.998927	ENSG00000100387.8	RBX1
748.327	-0.0219959	0.0974474	-0.22572	0.821419	0.998927	ENSG00000100393.13	EP300
307.457	-0.0119437	0.13958	-0.085569	0.931809	0.998927	ENSG00000100395.15	L3MBTL2
0.938169	-2.28118	2.53518	-0.89981	0.368221	NA	ENSG00000100399.16	CHADL
1821.39	0.0140191	0.0709618	0.197558	0.843391	0.998927	ENSG00000100401.19	RANGAP1
848.071	-0.056893	0.0906909	-0.627328	0.530444	0.998927	ENSG00000100403.12	ZC3H7B
897.354	0.0591274	0.0881127	0.671042	0.502194	0.998927	ENSG00000100410.8	PHF5A
1193.71	0.116688	0.0770983	1.51349	0.130155	0.886556	ENSG00000100412.16	ACO2
363.769	0.125162	0.127752	0.979729	0.32722	0.998927	ENSG00000100413.17	POLR3H
491.331	0.118019	0.10969	1.07593	0.281958	0.998927	ENSG00000100416.14	TRMU
209.545	0.0365099	0.168647	0.216486	0.828609	0.998927	ENSG00000100417.12	PMM1
1100.95	0.0526416	0.078188	0.67327	0.500776	0.998927	ENSG00000100418.8	DESI1
530.221	-0.0411997	0.110226	-0.373776	0.708571	0.998927	ENSG00000100422.14	CERK
326.602	-0.0107836	0.138613	-0.0777968	0.93799	0.998927	ENSG00000100425.18	BRD1
478.317	0.0480746	0.110771	0.434002	0.664287	0.998927	ENSG00000100426.7	ZBED4
60.9106	0.0486879	0.302134	0.161147	0.871978	0.998927	ENSG00000100429.18	HDAC10
118.099	0.110941	0.24166	0.459081	0.646176	0.998927	ENSG00000100439.10	ABHD4
689.071	-0.00840183	0.0957398	-0.0877569	0.93007	0.998927	ENSG00000100441.10	KHNYN
1777.28	0.0619809	0.0685667	0.903951	0.366022	0.998927	ENSG00000100442.11	FKBP3
137.861	0.00491312	0.246553	0.0199272	0.984101	0.998927	ENSG00000100445.17	SDR39U1
569.782	0.0977645	0.102401	0.954725	0.339717	0.998927	ENSG00000100461.18	RBM23
1859.46	-0.0097302	0.0632756	-0.153775	0.877787	0.998927	ENSG00000100462.16	PRMT5
278.02	-0.0312567	0.149765	-0.208705	0.834679	0.998927	ENSG00000100473.17	COCH
126.831	0.128739	0.223247	0.576667	0.564165	0.998927	ENSG00000100478.14	AP4S1
364.22	0.00763427	0.13822	0.0552326	0.955953	0.998927	ENSG00000100479.13	POLE2
157.731	0.250114	0.207225	1.20697	0.227444	0.998927	ENSG00000100483.14	VCPKMT
419.26	-0.224757	0.119419	-1.8821	0.059823	0.639592	ENSG00000100485.12	SOS2
68.8785	-0.0213218	0.307973	-0.0692326	0.944804	0.998927	ENSG00000100490.9	CDKL1
1374.81	-0.0817238	0.0719708	-1.13551	0.25616	0.998927	ENSG00000100503.23	NIN
1201.73	0.0629404	0.0734307	0.85714	0.391367	0.998927	ENSG00000100504.17	PYGL
0.953571	-1.00131	2.37809	-0.421057	0.673714	NA	ENSG00000100505.13	TRIM9
2270.36	0.0943819	0.0626311	1.50695	0.131824	0.888056	ENSG00000100519.12	PSMC6
1734.09	0.0126066	0.065734	0.191783	0.847912	0.998927	ENSG00000100522.10	GNPNAT1
192.73	-0.0391946	0.184357	-0.212602	0.831638	0.998927	ENSG00000100523.14	DDHD1
1246.49	0.110402	0.0751713	1.46867	0.141923	0.915497	ENSG00000100526.20	CDKN3
1504.1	0.0353306	0.0672321	0.525503	0.599234	0.998927	ENSG00000100528.12	CNIH1
117.155	0.126405	0.230993	0.547224	0.584225	0.998927	ENSG00000100532.12	CGRRF1
801.793	0.109632	0.0957006	1.14557	0.251972	0.998927	ENSG00000100554.12	ATP6V1D
1.25538	0.667896	2.21494	0.301541	0.763002	NA	ENSG00000100558.9	PLEK2
167.952	0.235279	0.20026	1.17487	0.240048	0.998927	ENSG00000100564.9	PIGH
2610.93	0.108022	0.0633757	1.70447	0.0882924	0.757408	ENSG00000100567.13	PSMA3
1354.69	0.0775273	0.0719164	1.07802	0.281025	0.998927	ENSG00000100568.11	VTI1B
368.409	0.023042	0.127647	0.180514	0.856749	0.998927	ENSG00000100575.14	TIMM9
173.671	0.0347319	0.193321	0.179659	0.85742	0.998927	ENSG00000100577.19	GSTZ1
555.041	-0.0984723	0.107673	-0.914551	0.360427	0.998927	ENSG00000100578.15	KIAA0586
954.237	-0.065132	0.0809984	-0.804116	0.42133	0.998927	ENSG00000100580.8	TMED8
8.27508	0.270771	0.881197	0.307277	0.758633	NA	ENSG00000100583.4	SAMD15
2975.72	0.073406	0.0506815	1.44838	0.147511	0.923429	ENSG00000100591.8	AHSA1
44.8629	0.242995	0.36972	0.657241	0.511026	0.998927	ENSG00000100592.15	DAAM1
6.12763	-0.102098	0.985012	-0.103652	0.917446	NA	ENSG00000100593.18	ISM2
412.311	-0.00266328	0.123621	-0.0215439	0.982812	0.998927	ENSG00000100596.6	SPTLC2
59.4236	0.228026	0.340615	0.669453	0.503207	0.998927	ENSG00000100599.16	RIN3
332.002	0.0270645	0.138494	0.19542	0.845064	0.998927	ENSG00000100600.15	LGMN
264.176	0.0551222	0.154007	0.357921	0.720403	0.998927	ENSG00000100601.10	ALKBH1
1782.03	0.116284	0.0623544	1.86488	0.0621976	0.653019	ENSG00000100603.13	SNW1
331.78	0.0152037	0.135941	0.11184	0.91095	0.998927	ENSG00000100605.17	ITPK1
311.706	-0.0241307	0.136207	-0.177161	0.859382	0.998927	ENSG00000100612.14	DHRS7
469.745	-0.0826013	0.112312	-0.735461	0.462059	0.998927	ENSG00000100614.18	PPM1A
536.736	-0.111874	0.104287	-1.07275	0.283382	0.998927	ENSG00000100625.9	SIX4
5.57644	1.75807	1.10069	1.59725	0.11021	NA	ENSG00000100626.17	GALNT16
0.386884	-0.291842	4.01402	-0.0727057	0.94204	NA	ENSG00000100628.11	ASB2
[truncated: 21,543 more rows]

## Sheet: NQO1-71 napa_vs_DMSO
baseMean	log2FoldChange	lfcSE	stat	pvalue	padj	EnsemblID	GeneName
1766.37	-0.00723117	0.0571805	-0.126462	0.899366	0.999711	ENSG00000000419.12	DPM1
134.906	-0.0717512	0.191011	-0.37564	0.707185	0.999711	ENSG00000000457.14	SCYL3
561.03	0.029464	0.0916377	0.321527	0.747811	0.999711	ENSG00000000460.17	C1orf112
46.5583	-0.00323163	0.313384	-0.010312	0.991772	0.999711	ENSG00000000971.15	CFH
1947.59	-0.0318213	0.054105	-0.58814	0.556438	0.999711	ENSG00000001036.13	FUCA2
341.971	0.00263402	0.121584	0.0216642	0.982716	0.999711	ENSG00000001084.12	GCLC
1375.62	-0.00598259	0.0621634	-0.0962396	0.92333	0.999711	ENSG00000001167.14	NFYA
34.3709	0.263945	0.362751	0.727621	0.466846	0.999711	ENSG00000001460.18	STPG1
114.737	0.0322372	0.208834	0.154367	0.87732	0.999711	ENSG00000001461.17	NIPAL3
2053.22	9.74204e-05	0.053809	0.00181048	0.998555	0.999711	ENSG00000001497.16	LAS1L
25.321	0.323432	0.442344	0.731176	0.464672	0.999711	ENSG00000001617.12	SEMA3F
1502.94	-0.0376916	0.0585005	-0.644295	0.519384	0.999711	ENSG00000001629.10	ANKIB1
1044.24	-0.0525685	0.0735633	-0.714602	0.474855	0.999711	ENSG00000001630.17	CYP51A1
546.328	0.0700168	0.0941897	0.743359	0.457264	0.999711	ENSG00000001631.15	KRIT1
92.7799	-0.237602	0.218048	-1.08968	0.275855	0.999711	ENSG00000002016.17	RAD52
23.1626	0.475914	0.436449	1.09042	0.275528	0.999711	ENSG00000002079.14	MYH16
274.574	0.0290947	0.131261	0.221656	0.824582	0.999711	ENSG00000002330.13	BAD
1119.58	0.0474343	0.0694419	0.683078	0.494557	0.999711	ENSG00000002549.12	LAP3
595.739	-0.0228055	0.0897177	-0.254191	0.799348	0.999711	ENSG00000002586.20	CD99
595.739	-0.0228055	0.0897177	-0.254191	0.799348	0.999711	ENSG00000002586.20_PAR_Y	CD99
0.467626	2.32394	3.25146	0.714739	0.474771	NA	ENSG00000002745.13	WNT16
21.8265	-0.0839441	0.454647	-0.184636	0.853515	0.999711	ENSG00000002746.15	HECW1
496.128	0.0938548	0.0996263	0.942069	0.346158	0.999711	ENSG00000002822.15	MAD1L1
4939.13	0.0617205	0.0379139	1.62791	0.103543	0.999711	ENSG00000002834.18	LASP1
413.359	-0.0216568	0.110798	-0.195462	0.845031	0.999711	ENSG00000002919.14	SNX11
3876.93	0.0289339	0.0418516	0.691345	0.489349	0.999711	ENSG00000003056.8	M6PR
56.2486	-0.197807	0.282636	-0.699863	0.484013	0.999711	ENSG00000003096.14	KLHL13
8.27242	0.0506797	0.755827	0.0670519	0.94654	0.999711	ENSG00000003147.19	ICA1
218.637	0.0918541	0.144863	0.634076	0.526031	0.999711	ENSG00000003249.13	DBNDD1
1372.1	-0.0243373	0.0620401	-0.392283	0.694849	0.999711	ENSG00000003393.15	ALS2
186.027	0.108238	0.177911	0.608384	0.542933	0.999711	ENSG00000003400.14	CASP10
879.021	0.0111831	0.0736313	0.15188	0.879282	0.999711	ENSG00000003402.20	CFLAR
1105.74	-0.118073	0.0667809	-1.76807	0.0770498	0.999711	ENSG00000003436.16	TFPI
337.933	-0.105676	0.118386	-0.89264	0.37205	0.999711	ENSG00000003509.16	NDUFAF7
926.439	0.00254308	0.0766002	0.0331994	0.973516	0.999711	ENSG00000003756.16	RBM5
34.4254	-0.158023	0.367296	-0.430234	0.667025	0.999711	ENSG00000003987.14	MTMR7
6.03647	-0.0315475	0.879554	-0.0358676	0.971388	0.999711	ENSG00000003989.17	SLC7A2
1571.93	0.00677203	0.0667606	0.101438	0.919203	0.999711	ENSG00000004059.11	ARF5
223.688	0.174509	0.14552	1.19921	0.230448	0.999711	ENSG00000004139.14	SARM1
2863.76	0.0515934	0.0490202	1.05249	0.292573	0.999711	ENSG00000004142.12	POLDIP2
854.133	0.174724	0.0782305	2.23346	0.0255188	0.999711	ENSG00000004399.12	PLXND1
5594.15	0.0264081	0.0375188	0.703863	0.481518	0.999711	ENSG00000004455.16	AK2
6050.52	0.0466429	0.0364106	1.28102	0.200185	0.999711	ENSG00000004478.8	FKBP4
2009.01	0.00698037	0.0550651	0.126766	0.899126	0.999711	ENSG00000004487.16	KDM1A
640.164	-0.00731963	0.0859325	-0.0851789	0.932119	0.999711	ENSG00000004534.15	RBM6
91.5147	0.134636	0.221638	0.60746	0.543546	0.999711	ENSG00000004660.14	CAMKK1
2567.92	-0.0260641	0.0531265	-0.490604	0.623707	0.999711	ENSG00000004700.16	RECQL
266.352	-0.07768	0.137655	-0.564309	0.572544	0.999711	ENSG00000004766.17	VPS50
1.37895	-1.65817	1.87392	-0.884865	0.376229	NA	ENSG00000004776.13	HSPB6
48.9148	-0.068416	0.310693	-0.220205	0.825712	0.999711	ENSG00000004777.18	ARHGAP33
1138.24	0.0675847	0.066848	1.01102	0.312006	0.999711	ENSG00000004779.10	NDUFAB1
1.71525	-1.26809	1.67243	-0.758231	0.448313	0.999711	ENSG00000004799.8	PDK4
0.965273	1.06662	2.21934	0.4806	0.630801	NA	ENSG00000004809.14	SLC22A16
2.15608	-0.306197	1.49572	-0.204716	0.837794	0.999711	ENSG00000004838.14	ZMYND10
2.00375	-0.0706328	1.41893	-0.0497788	0.960299	0.999711	ENSG00000004848.8	ARX
1338.39	0.0109993	0.0666894	0.164933	0.868997	0.999711	ENSG00000004864.13	SLC25A13
386.345	-0.0427176	0.112347	-0.380229	0.703775	0.999711	ENSG00000004866.20	ST7
2843.62	-0.0737664	0.0527083	-1.39952	0.161656	0.999711	ENSG00000004897.12	CDC27
0.795789	-0.639481	2.38156	-0.268513	0.788304	NA	ENSG00000004939.15	SLC4A1
1496.09	0.0253003	0.0582149	0.434603	0.663851	0.999711	ENSG00000004961.15	HCCS
446.466	0.0467007	0.106173	0.439855	0.660042	0.999711	ENSG00000004975.12	DVL2
1522.74	0.151028	0.0645629	2.33923	0.0193233	0.999711	ENSG00000005007.12	UPF1
1097.26	0.0417239	0.0698117	0.597664	0.550064	0.999711	ENSG00000005020.13	SKAP2
10281.7	-0.00162961	0.0391428	-0.0416324	0.966792	0.999711	ENSG00000005022.6	SLC25A5
457.187	-0.0803342	0.101182	-0.793953	0.427223	0.999711	ENSG00000005059.16	MCUB
34.0019	-0.081146	0.357011	-0.227292	0.820196	0.999711	ENSG00000005073.5	HOXA11
755.009	0.0236595	0.0820182	0.288467	0.77299	0.999711	ENSG00000005075.15	POLR2J
1173.28	0.0225561	0.0689706	0.327039	0.743638	0.999711	ENSG00000005100.13	DHX33
0.906734	-3.32233	2.3898	-1.39021	0.164465	NA	ENSG00000005102.13	MEOX1
1092.41	-0.0960064	0.0761764	-1.26032	0.207555	0.999711	ENSG00000005156.11	LIG3
778.52	-0.00827667	0.0793885	-0.104255	0.916967	0.999711	ENSG00000005175.10	RPAP3
4.03048	-0.876465	1.06776	-0.820844	0.411735	0.999711	ENSG00000005187.12	ACSM3
298.153	-0.00742413	0.123641	-0.060046	0.952119	0.999711	ENSG00000005189.19	REXO5
1807.03	0.00303411	0.0574422	0.0528202	0.957875	0.999711	ENSG00000005194.15	CIAPIN1
213.972	0.137472	0.161083	0.853424	0.393424	0.999711	ENSG00000005206.17	SPPL2B
103.651	0.143371	0.231005	0.620642	0.534835	0.999711	ENSG00000005238.19	FAM214B
70.5295	-0.276281	0.250614	-1.10242	0.27028	0.999711	ENSG00000005243.10	COPZ2
1207.52	-0.0386985	0.0695474	-0.556434	0.577914	0.999711	ENSG00000005249.13	PRKAR2B
644.078	0.0231255	0.0896776	0.257874	0.796504	0.999711	ENSG00000005302.18	MSL3
676.898	0.0159457	0.095567	0.166854	0.867485	0.999711	ENSG00000005339.14	CREBBP
677.343	-0.0669213	0.08647	-0.773925	0.438975	0.999711	ENSG00000005436.13	GCFC2
296.137	-0.109759	0.125926	-0.871616	0.383418	0.999711	ENSG00000005448.16	WDR54
101.099	-0.0324846	0.211627	-0.1535	0.878004	0.999711	ENSG00000005469.11	CROT
0.317519	-1.8412	3.80574	-0.483796	0.628531	NA	ENSG00000005471.17	ABCB4
1093.58	0.0213642	0.079146	0.269934	0.787211	0.999711	ENSG00000005483.20	KMT2E
745.117	0.013765	0.0798016	0.17249	0.863052	0.999711	ENSG00000005486.17	RHBDD2
71.8869	0.210432	0.254735	0.82608	0.408759	0.999711	ENSG00000005513.10	SOX8
1158.39	-0.0327366	0.0667546	-0.490402	0.623849	0.999711	ENSG00000005700.15	IBTK
380.401	-0.128327	0.113362	-1.13202	0.257627	0.999711	ENSG00000005801.18	ZNF195
756.416	-0.131167	0.0866049	-1.51454	0.129888	0.999711	ENSG00000005810.18	MYCBP2
502.692	0.0367298	0.100109	0.366897	0.713696	0.999711	ENSG00000005812.11	FBXL3
0.841124	-1.93436	2.34757	-0.823987	0.409947	NA	ENSG00000005844.17	ITGAL
69.0496	0.179033	0.258753	0.691908	0.488995	0.999711	ENSG00000005882.11	PDK2
995.101	0.0486203	0.0704722	0.689922	0.490243	0.999711	ENSG00000005884.18	ITGA3
1143.48	-0.140213	0.0750072	-1.86933	0.0615766	0.999711	ENSG00000005889.15	ZFX
1880.22	0.00505926	0.0609374	0.083024	0.933832	0.999711	ENSG00000005893.15	LAMP2
0.831427	0.413127	2.34661	0.176053	0.860252	NA	ENSG00000005961.18	ITGA2B
831.129	0.0113734	0.0812249	0.140024	0.888641	0.999711	ENSG00000006007.12	GDE1
157.714	0.120831	0.169993	0.710803	0.477207	0.999711	ENSG00000006015.17	REX1BD
163.641	0.165789	0.173043	0.958081	0.338022	0.999711	ENSG00000006016.11	CRLF1
22.4223	-0.352901	0.444911	-0.793195	0.427664	0.999711	ENSG00000006025.12	AC003665.1
0.317519	-1.8412	3.80574	-0.483796	0.628531	NA	ENSG00000006047.13	YBX2
658.24	0.013718	0.0869913	0.157695	0.874698	0.999711	ENSG00000006062.16	MAP3K14
110.425	0.167045	0.210612	0.793143	0.427694	0.999711	ENSG00000006118.14	TMEM132A
12137.3	0.00983478	0.0300152	0.32766	0.743169	0.999711	ENSG00000006125.18	AP2B1
607.079	0.1548	0.0939392	1.64788	0.0993777	0.999711	ENSG00000006194.10	ZNF263
0.331198	1.81271	3.74311	0.484279	0.628188	NA	ENSG00000006210.7	CX3CL1
652.99	0.129371	0.0863659	1.49793	0.13415	0.999711	ENSG00000006282.21	SPATA20
2.18856	-0.261006	1.4776	-0.176641	0.85979	0.999711	ENSG00000006283.18	CACNA1G
967.302	0.190864	0.0770598	2.47683	0.0132557	0.999711	ENSG00000006327.13	TNFRSF12A
11.992	-0.214358	0.612494	-0.349975	0.726357	0.999711	ENSG00000006377.11	DLX6
80.1167	-0.259131	0.239733	-1.08091	0.279736	0.999711	ENSG00000006432.15	MAP3K9
1190.96	-0.0346229	0.0671042	-0.515957	0.605884	0.999711	ENSG00000006451.8	RALA
829.342	0.0921856	0.0775414	1.18886	0.234496	0.999711	ENSG00000006453.14	BAIAP2L1
232.845	-0.0445362	0.140794	-0.316322	0.751758	0.999711	ENSG00000006459.11	KDM7A
290.686	-0.142638	0.133078	-1.07184	0.283793	0.999711	ENSG00000006468.14	ETV1
1165.6	-0.0471322	0.0708576	-0.665167	0.505944	0.999711	ENSG00000006530.17	AGK
239.866	-0.0288984	0.13639	-0.211881	0.8322	0.999711	ENSG00000006534.16	ALDH3B1
2408.95	-0.0424321	0.0560741	-0.756715	0.449221	0.999711	ENSG00000006576.16	PHTF2
1529.63	-0.00344776	0.0607095	-0.0567911	0.954712	0.999711	ENSG00000006607.14	FARP2
1508.72	0.0650854	0.0652071	0.998133	0.318215	0.999711	ENSG00000006625.18	GGCT
1879.1	-0.0229288	0.0632891	-0.362287	0.717138	0.999711	ENSG00000006634.8	DBF4
18.2512	-0.273742	0.491836	-0.556572	0.57782	0.999711	ENSG00000006638.11	TBXA2R
1203.09	0.0866329	0.0718473	1.20579	0.227898	0.999711	ENSG00000006652.14	IFRD1
394.737	0.0602091	0.10859	0.554463	0.579262	0.999711	ENSG00000006695.11	COX10
472.136	-0.102021	0.099163	-1.02882	0.303563	0.999711	ENSG00000006704.10	GTF2IRD1
599.905	0.0117748	0.0923401	0.127515	0.898533	0.999711	ENSG00000006712.15	PAF1
1107.58	-0.0653027	0.0668806	-0.976407	0.328863	0.999711	ENSG00000006715.16	VPS41
59.9656	0.0338431	0.275585	0.122805	0.902262	0.999711	ENSG00000006740.17	ARHGAP44
1939.8	0.0812197	0.0546492	1.4862	0.137226	0.999711	ENSG00000006744.19	ELAC2
432.504	0.0760095	0.106272	0.715238	0.474462	0.999711	ENSG00000006756.16	ARSD
2576.29	0.117848	0.050636	2.32736	0.0199462	0.999711	ENSG00000006831.10	ADIPOR2
26.4036	-0.128286	0.428899	-0.299106	0.764859	0.999711	ENSG00000006837.12	CDKL3
337.21	0.0456275	0.121409	0.375818	0.707052	0.999711	ENSG00000007047.15	MARK4
0.500648	-0.980331	3.01606	-0.325037	0.745153	NA	ENSG00000007062.11	PROM1
753.177	0.0970804	0.0816722	1.18866	0.234574	0.999711	ENSG00000007080.11	CCDC124
3435.05	-0.0607238	0.0471864	-1.28689	0.198132	0.999711	ENSG00000007168.13	PAFAH1B1
1.58909	-0.581864	1.72383	-0.337542	0.735709	0.999711	ENSG00000007171.17	NOS2
3465.96	0.0492414	0.0448388	1.09819	0.272123	0.999711	ENSG00000007202.15	KIAA0100
52.5963	-0.0177726	0.304347	-0.0583958	0.953433	0.999711	ENSG00000007237.18	GAS7
131.46	0.0616582	0.192354	0.320545	0.748555	0.999711	ENSG00000007255.10	TRAPPC6A
25.5682	0.0510575	0.41507	0.123009	0.9021	0.999711	ENSG00000007264.15	MATK
225.416	0.171764	0.147302	1.16607	0.243588	0.999711	ENSG00000007341.19	ST7L
228.143	0.0363886	0.146803	0.247874	0.804232	0.999711	ENSG00000007372.22	PAX6
307.067	0.184743	0.126613	1.45911	0.144535	0.999711	ENSG00000007376.8	RPUSD1
89.5991	0.225896	0.22833	0.98934	0.322497	0.999711	ENSG00000007384.15	RHBDF1
336.479	-0.0988159	0.118452	-0.834229	0.404152	0.999711	ENSG00000007392.16	LUC7L
16.8454	0.299873	0.512884	0.58468	0.558763	0.999711	ENSG00000007402.11	CACNA2D2
30.7254	0.123878	0.407072	0.304315	0.760888	0.999711	ENSG00000007516.13	BAIAP3
465.741	0.0874457	0.105014	0.832708	0.405009	0.999711	ENSG00000007520.4	TSR3
168.763	0.247177	0.17343	1.42522	0.154092	0.999711	ENSG00000007541.16	PIGQ
212.238	0.0201761	0.144844	0.139295	0.889217	0.999711	ENSG00000007545.15	CRAMP1
175.46	-0.0191507	0.162305	-0.117992	0.906074	0.999711	ENSG00000007866.21	TEAD3
1335.53	0.0103918	0.0634109	0.163881	0.869825	0.999711	ENSG00000007923.16	DNAJC11
187.56	-0.0475459	0.161554	-0.294304	0.768525	0.999711	ENSG00000007944.15	MYLIP
4.1323	-0.675705	1.04901	-0.644133	0.519489	0.999711	ENSG00000007952.18	NOX1
322.779	-0.0280973	0.135948	-0.206678	0.836262	0.999711	ENSG00000007968.7	E2F2
4631.62	0.00793156	0.0475393	0.166842	0.867494	0.999711	ENSG00000008018.9	PSMB1
5.48972	0.481378	0.938033	0.513178	0.607827	0.999711	ENSG00000008056.14	SYN1
180.651	-0.109158	0.170194	-0.641371	0.521282	0.999711	ENSG00000008083.14	JARID2
87.6954	-0.3669	0.225209	-1.62915	0.103282	0.999711	ENSG00000008086.11	CDKL5
446.006	0.070733	0.112464	0.628937	0.52939	0.999711	ENSG00000008128.23	CDK11A
880.054	0.0158088	0.0768373	0.205743	0.836991	0.999711	ENSG00000008130.15	NADK
0.644703	2.77998	2.67089	1.04084	0.297949	NA	ENSG00000008226.19	DLEC1
415.906	0.0155235	0.105763	0.146776	0.883309	0.999711	ENSG00000008256.16	CYTH3
204.47	-0.0361853	0.149493	-0.242053	0.808739	0.999711	ENSG00000008277.14	ADAM22
1976.13	-0.0769976	0.0591233	-1.30232	0.192806	0.999711	ENSG00000008282.8	SYPL1
512.332	0.0587419	0.0956827	0.613924	0.539265	0.999711	ENSG00000008283.16	CYB561
4451.63	0.0563424	0.0436997	1.28931	0.197291	0.999711	ENSG00000008294.21	SPAG9
47.8255	-0.292306	0.33276	-0.87843	0.37971	0.999711	ENSG00000008300.17	CELSR3
2.3619	0.771773	1.35426	0.569886	0.568755	0.999711	ENSG00000008311.15	AASS
8.14161	-0.436321	0.778734	-0.560295	0.575278	0.999711	ENSG00000008323.15	PLEKHG6
291.442	0.105491	0.126142	0.836287	0.402993	0.999711	ENSG00000008324.11	SS18L2
41.3778	-0.274162	0.336573	-0.814568	0.415319	0.999711	ENSG00000008382.15	MPND
1075.42	-0.00940355	0.068431	-0.137417	0.890701	0.999711	ENSG00000008394.13	MGST1
938.593	0.0300685	0.0752543	0.399559	0.689482	0.999711	ENSG00000008405.12	CRY1
800.364	0.0844821	0.0820675	1.02942	0.303281	0.999711	ENSG00000008441.16	NFIX
3.4362	-1.37567	1.2869	-1.06898	0.28508	0.999711	ENSG00000008513.16	ST3GAL1
1.16568	1.2547	1.97094	0.636602	0.524384	NA	ENSG00000008516.17	MMP25
5.15715	-1.12533	0.937703	-1.2001	0.230102	0.999711	ENSG00000008517.16	IL32
335.33	0.0668586	0.134865	0.495744	0.620075	0.999711	ENSG00000008710.19	PKD1
49.3068	0.361566	0.306717	1.17883	0.238467	0.999711	ENSG00000008735.14	MAPK8IP2
538.027	0.0162052	0.100591	0.1611	0.872015	0.999711	ENSG00000008838.20	MED24
326.436	-0.0567314	0.11711	-0.484429	0.628082	0.999711	ENSG00000008853.16	RHOBTB2
415.564	-0.0715986	0.104348	-0.686155	0.492615	0.999711	ENSG00000008869.12	HEATR5B
2840.93	-0.0366427	0.0495293	-0.739819	0.45941	0.999711	ENSG00000008952.17	SEC62
12842.3	0.00586472	0.0374664	0.156533	0.875613	0.999711	ENSG00000008988.9	RPS20
15490.1	0.0155585	0.0319659	0.48672	0.626457	0.999711	ENSG00000009307.16	CSDE1
4108.6	-0.00297023	0.0410908	-0.0722845	0.942376	0.999711	ENSG00000009335.18	UBE3C
1212.59	-0.0396693	0.0718179	-0.552359	0.580703	0.999711	ENSG00000009413.15	REV3L
30.0896	0.179147	0.398035	0.450078	0.652654	0.999711	ENSG00000009724.16	MASP2
101.445	-0.405186	0.21913	-1.84907	0.0644479	0.999711	ENSG00000009780.15	FAM76A
0.363801	-2.00626	3.6117	-0.555489	0.57856	NA	ENSG00000009790.15	TRAF3IP3
177.845	0.0512516	0.168154	0.30479	0.760526	0.999711	ENSG00000009830.11	POMT2
1646.44	-0.0757603	0.0618373	-1.22516	0.220516	0.999711	ENSG00000009844.16	VTA1
30.8756	-0.0539836	0.392273	-0.137617	0.890543	0.999711	ENSG00000009950.16	MLXIPL
6153.23	-0.041149	0.0388398	-1.05945	0.289393	0.999711	ENSG00000009954.11	BAZ1B
965.421	0.06213	0.0729541	0.851631	0.394419	0.999711	ENSG00000010017.13	RANBP9
0.956555	-2.21736	2.36984	-0.935655	0.349451	NA	ENSG00000010030.14	ETV7
283.317	-0.0988436	0.138486	-0.713745	0.475385	0.999711	ENSG00000010072.16	SPRTN
743.279	-0.0347097	0.083231	-0.417028	0.676658	0.999711	ENSG00000010165.20	EEF1AKNMT
215.433	0.0305995	0.15141	0.202097	0.839841	0.999711	ENSG00000010219.13	DYRK4
5669.92	-0.000237349	0.0364466	-0.00651225	0.994804	0.999711	ENSG00000010244.18	ZNF207
1538.09	0.0726444	0.0635429	1.14323	0.252942	0.999711	ENSG00000010256.11	UQCRC1
1031.15	-0.00564404	0.0731518	-0.0771552	0.9385	0.999711	ENSG00000010270.13	STARD3NL
1790.79	-0.00232846	0.0620253	-0.0375405	0.970054	0.999711	ENSG00000010278.14	CD9
6543.72	0.0188317	0.0363311	0.518336	0.604224	0.999711	ENSG00000010292.13	NCAPD2
0.668045	-1.55422	2.54744	-0.610112	0.541787	NA	ENSG00000010295.19	IFFO1
11.4386	0.286889	0.620115	0.462638	0.643624	0.999711	ENSG00000010310.9	GIPR
118.458	-0.103436	0.19948	-0.51853	0.604088	0.999711	ENSG00000010318.21	PHF7
22.4866	0.184646	0.451041	0.409378	0.682262	0.999711	ENSG00000010319.6	SEMA3G
509.301	0.0462085	0.109601	0.421608	0.673311	0.999711	ENSG00000010322.16	NISCH
1.04416	-1.08864	2.06316	-0.52766	0.597736	NA	ENSG00000010327.10	STAB1
121.319	0.126853	0.195164	0.649981	0.515705	0.999711	ENSG00000010361.13	FUZ
1.81962	-0.912131	1.59147	-0.573139	0.566551	0.999711	ENSG00000010379.16	SLC6A13
472.963	0.0949318	0.101084	0.93914	0.347659	0.999711	ENSG00000010404.18	IDS
289.294	0.0368321	0.130601	0.28202	0.777928	0.999711	ENSG00000010539.11	ZNF200
4.00181	-0.0906733	1.02685	-0.0883022	0.929637	0.999711	ENSG00000010610.10	CD4
57.0923	0.131742	0.282607	0.466167	0.641096	0.999711	ENSG00000010626.15	LRRC23
474.631	-0.0153062	0.100141	-0.152846	0.878519	0.999711	ENSG00000010704.18	HFE
414.608	0.0261812	0.108268	0.241818	0.808922	0.999711	ENSG00000010803.16	SCMH1
12.9769	0.390595	0.604927	0.64569	0.51848	0.999711	ENSG00000010810.17	FYN
84.9974	0.307904	0.246347	1.24988	0.211343	0.999711	ENSG00000010818.10	HIVEP2
2153.04	0.0166324	0.0512049	0.32482	0.745317	0.999711	ENSG00000011007.12	ELOA
545.148	0.118344	0.0980144	1.20741	0.227274	0.999711	ENSG00000011009.11	LYPLA2
151.219	0.0492837	0.190933	0.25812	0.796314	0.999711	ENSG00000011021.23	CLCN6
574.949	0.114612	0.102389	1.11938	0.262979	0.999711	ENSG00000011028.14	AC080038.1
1950.95	-0.0890741	0.0751891	-1.18467	0.236149	0.999711	ENSG00000011052.21	NME1-NME2
373.924	0.0434334	0.114016	0.38094	0.703248	0.999711	ENSG00000011105.14	TSPAN9
486.722	-0.0025906	0.100757	-0.0257115	0.979487	0.999711	ENSG00000011114.15	BTBD7
151.886	-0.103593	0.175989	-0.588634	0.556107	0.999711	ENSG00000011132.12	APBA3
146.005	0.145248	0.174656	0.831622	0.405622	0.999711	ENSG00000011143.16	MKS1
294.886	-0.0974687	0.130192	-0.748654	0.454066	0.999711	ENSG00000011198.9	ABHD5
663.937	0.107701	0.0906735	1.18779	0.234916	0.999711	ENSG00000011243.18	AKAP8L
413.828	-0.112709	0.108235	-1.04133	0.297721	0.999711	ENSG00000011258.16	MBTD1
2045.34	0.0556779	0.0538516	1.03391	0.301176	0.999711	ENSG00000011260.14	UTP18
1433.07	-0.0148476	0.0608054	-0.244182	0.80709	0.999711	ENSG00000011275.18	RNF216
979.731	0.0649497	0.0714568	0.908936	0.363384	0.999711	ENSG00000011295.16	TTC19
7289.78	0.0839011	0.0343481	2.44267	0.0145791	0.999711	ENSG00000011304.20	PTBP1
46.9839	0.0260881	0.317827	0.0820828	0.934581	0.999711	ENSG00000011332.19	DPF1
58.4149	0.0762937	0.282274	0.270283	0.786943	0.999711	ENSG00000011347.9	SYT7
480.621	0.0724393	0.101109	0.716448	0.473715	0.999711	ENSG00000011376.11	LARS2
1448.18	-0.0284686	0.0609683	-0.466941	0.640542	0.999711	ENSG00000011405.13	PIK3C2A
184.994	0.258453	0.164374	1.57235	0.11587	0.999711	ENSG00000011422.12	PLAUR
14449.6	-0.01026	0.0354642	-0.289305	0.772348	0.999711	ENSG00000011426.11	ANLN
599.473	0.0685752	0.0906093	0.756823	0.449156	0.999711	ENSG00000011451.19	WIZ
1006.95	-0.116928	0.0696367	-1.67912	0.0931284	0.999711	ENSG00000011454.17	RABGAP1
0.677726	-0.062946	2.55175	-0.0246678	0.98032	NA	ENSG00000011465.17	DCN
256.025	-0.0348325	0.134154	-0.259646	0.795137	0.999711	ENSG00000011478.12	QPCTL
1048.09	0.0230302	0.0710554	0.324117	0.74585	0.999711	ENSG00000011485.14	PPP5C
243.121	-0.155647	0.139581	-1.1151	0.264805	0.999711	ENSG00000011523.14	CEP68
601.001	-0.0461605	0.0903387	-0.510972	0.609371	0.999711	ENSG00000011566.15	MAP4K3
2.82813	-0.276594	1.24898	-0.221456	0.824737	0.999711	ENSG00000011590.14	ZBTB32
83.1768	0.144826	0.235198	0.615763	0.538051	0.999711	ENSG00000011638.10	TMEM159
1590.21	0.0027745	0.0587348	0.0472378	0.962324	0.999711	ENSG00000012048.22	BRCA1
1530.45	0.115587	0.0628364	1.83949	0.0658436	0.999711	ENSG00000012061.15	ERCC1
3.33977	0.983313	1.20591	0.815412	0.414836	0.999711	ENSG00000012124.17	CD22
30.7308	0.150429	0.378933	0.39698	0.691382	0.999711	ENSG00000012171.19	SEMA3B
1695.02	-0.0578415	0.0583099	-0.991966	0.321214	0.999711	ENSG00000012174.12	MBTPS2
83.8949	-0.0575657	0.239684	-0.240173	0.810196	0.999711	ENSG00000012211.13	PRICKLE3
581.692	0.0374024	0.0917312	0.407739	0.683465	0.999711	ENSG00000012232.8	EXTL3
4511.33	0.00903685	0.0427832	0.211224	0.832712	0.999711	ENSG00000012660.14	ELOVL5
100.936	-0.0782476	0.225744	-0.346622	0.728876	0.999711	ENSG00000012822.16	CALCOCO1
1308.16	-0.0151281	0.0641595	-0.235788	0.813597	0.999711	ENSG00000012963.15	UBR7
846.473	0.0221194	0.0786175	0.281355	0.778438	0.999711	ENSG00000012983.11	MAP4K5
2737.53	0.00686753	0.0494386	0.13891	0.889521	0.999711	ENSG00000013275.7	PSMC4
199.293	0.000232397	0.159618	0.00145596	0.998838	0.999711	ENSG00000013288.8	MAN2B2
0.846662	-1.94523	2.684	-0.724748	0.468606	NA	ENSG00000013293.6	SLC7A14
3553.74	-0.0339935	0.0457771	-0.742587	0.457732	0.999711	ENSG00000013297.11	CLDN11
1822.7	0.0605188	0.0599724	1.00911	0.312921	0.999711	ENSG00000013306.16	SLC25A39
368.676	0.0941116	0.119312	0.788786	0.430237	0.999711	ENSG00000013364.19	MVP
1088.17	0.0107895	0.074325	0.145167	0.884579	0.999711	ENSG00000013374.16	NUB1
407.325	0.0493612	0.11005	0.448536	0.653767	0.999711	ENSG00000013375.16	PGM3
19.182	-0.192915	0.486576	-0.396474	0.691755	0.999711	ENSG00000013392.8	RWDD2A
969.966	-0.0771402	0.0771067	-1.00043	0.317101	0.999711	ENSG00000013441.16	CLK1
374	-0.09017	0.110214	-0.81814	0.413277	0.999711	ENSG00000013503.10	POLR3B
318.82	0.117274	0.121523	0.965031	0.334529	0.999711	ENSG00000013523.9	ANGEL1
1233.39	0.0273913	0.063525	0.43119	0.66633	0.999711	ENSG00000013561.18	RNF14
226.423	-0.0311942	0.144723	-0.215544	0.829343	0.999711	ENSG00000013563.14	DNASE1L1
906.774	0.0150557	0.0807601	0.186425	0.852111	0.999711	ENSG00000013573.17	DDX11
557.563	0.0947614	0.0929616	1.01936	0.308032	0.999711	ENSG00000013583.10	HEBP1
13686.8	0.0350173	0.044143	0.79327	0.427621	0.999711	ENSG00000013588.8	GPRC5A
10.832	-0.220325	0.641132	-0.34365	0.731109	0.999711	ENSG00000013619.14	MAMLD1
1882.46	0.0747527	0.0530746	1.40845	0.158999	0.999711	ENSG00000013810.19	TACC3
815.924	-0.0354903	0.0796817	-0.445401	0.65603	0.999711	ENSG00000014123.10	UFL1
693.572	-0.0191215	0.0851109	-0.224666	0.822239	0.999711	ENSG00000014138.9	POLA2
247.229	0.0741148	0.137496	0.539031	0.589866	0.999711	ENSG00000014164.7	ZC3H3
836.409	0.0638954	0.0790033	0.808769	0.418648	0.999711	ENSG00000014216.15	CAPN1
0.847176	-1.98189	2.47626	-0.800356	0.423505	NA	ENSG00000014257.16	ACPP
3032.84	-0.00216588	0.0537967	-0.0402605	0.967885	0.999711	ENSG00000014641.18	MDH1
1265.65	-0.0080207	0.0693581	-0.115642	0.907936	0.999711	ENSG00000014824.14	SLC30A9
50.0819	-0.376388	0.298142	-1.26244	0.206789	0.999711	ENSG00000014914.21	MTMR11
1286.66	-0.00640502	0.0649663	-0.0985899	0.921464	0.999711	ENSG00000014919.12	COX15
170.417	-0.155048	0.166699	-0.930109	0.352314	0.999711	ENSG00000015133.19	CCDC88C
186.721	-0.00896442	0.155692	-0.0575778	0.954085	0.999711	ENSG00000015153.14	YAF2
1662.74	-0.0493557	0.059047	-0.835872	0.403227	0.999711	ENSG00000015171.19	ZMYND11
17.7177	0.00884831	0.528723	0.0167352	0.986648	0.999711	ENSG00000015285.10	WAS
924.844	0.0458182	0.0763693	0.599956	0.548535	0.999711	ENSG00000015475.18	BID
9379.75	0.0347773	0.0409804	0.848633	0.396085	0.999711	ENSG00000015479.18	MATR3
319	0.114027	0.12181	0.936104	0.34922	0.999711	ENSG00000015532.9	XYLT2
36.6246	0.364001	0.452419	0.804566	0.42107	0.999711	ENSG00000015568.13	RGPD5
0.321517	-0.0687597	3.82815	-0.0179616	0.985669	NA	ENSG00000015592.16	STMN4
1347.39	-0.0243937	0.0636551	-0.383217	0.701559	0.999711	ENSG00000015676.18	NUDCD3
341.447	0.072023	0.119398	0.603215	0.546366	0.999711	ENSG00000016391.11	CHDH
366.691	0.0913184	0.112913	0.808751	0.418659	0.999711	ENSG00000016864.18	GLT8D1
2466.82	0.0195532	0.0480598	0.406851	0.684117	0.999711	ENSG00000017260.19	ATP2C1
0.805469	0.579385	2.25718	0.256686	0.797421	NA	ENSG00000017483.15	SLC38A5
2414.89	0.028231	0.047997	0.588182	0.55641	0.999711	ENSG00000017797.13	RALBP1
232.533	-0.0975041	0.139743	-0.697738	0.485341	0.999711	ENSG00000018189.13	RUFY3
0.992771	-0.0445261	2.31462	-0.0192369	0.984652	NA	ENSG00000018236.15	CNTN1
3.07919	0.120596	1.21849	0.0989717	0.921161	0.999711	ENSG00000018280.17	SLC11A1
4493.51	-0.00498451	0.0398425	-0.125105	0.90044	0.999711	ENSG00000018408.14	WWTR1
1392.86	-0.0323571	0.0652216	-0.496111	0.619816	0.999711	ENSG00000018510.15	AGPS
865.253	0.0451664	0.0807679	0.559212	0.576017	0.999711	ENSG00000018610.14	CXorf56
690.291	-0.050367	0.0828248	-0.608115	0.543111	0.999711	ENSG00000018699.13	TTC27
13.2215	-0.255962	0.57355	-0.446276	0.655398	0.999711	ENSG00000018869.16	ZNF582
5.15977	-0.161638	0.926842	-0.174396	0.861554	0.999711	ENSG00000019102.12	VSIG2
364.184	0.0310288	0.114302	0.271464	0.786034	0.999711	ENSG00000019144.19	PHLDB1
43.4893	0.0772925	0.316586	0.244144	0.807119	0.999711	ENSG00000019485.13	PRDM11
89.0031	-0.120556	0.233462	-0.516384	0.605587	0.999711	ENSG00000019549.12	SNAI2
4.82524	-0.283125	1.0023	-0.282475	0.777579	0.999711	ENSG00000019582.15	CD74
724.226	0.0970518	0.0830507	1.16859	0.242571	0.999711	ENSG00000019995.6	ZRANB1
497.974	0.127595	0.104994	1.21526	0.224267	0.999711	ENSG00000020129.16	NCDN
34.5103	-0.173843	0.36095	-0.481628	0.63007	0.999711	ENSG00000020181.17	ADGRA2
123.98	-0.0438122	0.207073	-0.211578	0.832436	0.999711	ENSG00000020256.20	ZFP64
815.49	-0.0267191	0.0844197	-0.316503	0.75162	0.999711	ENSG00000020426.11	MNAT1
535.058	-0.153548	0.0927208	-1.65603	0.0977163	0.999711	ENSG00000020577.13	SAMD4A
1067.53	-0.0236263	0.0684806	-0.345007	0.730089	0.999711	ENSG00000020922.12	MRE11
0.635022	1.36588	2.74636	0.497339	0.61895	NA	ENSG00000021300.14	PLEKHB1
730.324	0.117876	0.0893131	1.3198	0.186901	0.999711	ENSG00000021355.13	SERPINB1
1.34998	0.787783	1.95416	0.403132	0.686851	NA	ENSG00000021488.13	SLC7A9
577.693	-0.038073	0.0981591	-0.38787	0.698112	0.999711	ENSG00000021574.12	SPAST
148.704	0.0163729	0.17558	0.0932502	0.925705	0.999711	ENSG00000021762.20	OSBPL5
2228.24	0.00316053	0.0522646	0.0604719	0.95178	0.999711	ENSG00000021776.11	AQR
182.633	-0.00499714	0.158807	-0.0314668	0.974897	0.999711	ENSG00000021826.15	CPS1
83.623	0.110318	0.234916	0.469606	0.638637	0.999711	ENSG00000022267.17	FHL1
1769.83	-0.0319089	0.0579038	-0.551067	0.581588	0.999711	ENSG00000022277.12	RTF2
195.475	0.18069	0.164621	1.09761	0.272373	0.999711	ENSG00000022567.9	SLC45A4
1857.23	0.0546041	0.0580948	0.939914	0.347262	0.999711	ENSG00000022840.16	RNF10
194.257	-0.120318	0.150487	-0.799525	0.423986	0.999711	ENSG00000022976.15	ZNF839
636.286	0.0659218	0.0881636	0.747722	0.454628	0.999711	ENSG00000023041.11	ZDHHC6
145.77	-0.0885013	0.178932	-0.49461	0.620876	0.999711	ENSG00000023171.18	GRAMD1B
1238.18	0.148372	0.0631209	2.35059	0.0187434	0.999711	ENSG00000023191.17	RNH1
2704.79	-0.0685694	0.0475758	-1.44126	0.14951	0.999711	ENSG00000023228.14	NDUFS1
2124.17	0.0105528	0.056977	0.185212	0.853063	0.999711	ENSG00000023287.13	RB1CC1
1186.26	-0.0236055	0.0689378	-0.342417	0.732037	0.999711	ENSG00000023318.8	ERP44
1050.84	0.0603653	0.0695478	0.867969	0.385411	0.999711	ENSG00000023330.15	ALAS1
956.286	-0.175702	0.0803938	-2.18551	0.0288512	0.999711	ENSG00000023445.14	BIRC3
861.777	-0.0699517	0.0790811	-0.884556	0.376396	0.999711	ENSG00000023516.9	AKAP11
583.596	-0.0973791	0.0919131	-1.05947	0.289386	0.999711	ENSG00000023572.9	GLRX2
515.106	-0.0356102	0.101921	-0.349389	0.726797	0.999711	ENSG00000023608.5	SNAPC1
1120.23	0.0336292	0.069525	0.4837	0.628599	0.999711	ENSG00000023697.13	DERA
5554.95	0.0482246	0.0380053	1.26889	0.204479	0.999711	ENSG00000023734.11	STRAP
101.109	0.11231	0.209254	0.536715	0.591465	0.999711	ENSG00000023839.11	ABCC2
498.176	0.162581	0.0987113	1.64703	0.0995509	0.999711	ENSG00000023892.11	DEF6
125.758	0.0696032	0.192313	0.361928	0.717406	0.999711	ENSG00000023902.14	PLEKHO1
2665.77	-0.0265808	0.0543018	-0.489502	0.624487	0.999711	ENSG00000023909.10	GCLM
1064.75	-0.00166655	0.0732971	-0.0227369	0.98186	0.999711	ENSG00000024048.10	UBR2
225.363	0.0735554	0.145867	0.504263	0.614077	0.999711	ENSG00000024422.12	EHD2
2382.91	-0.0866918	0.0572544	-1.51415	0.129988	0.999711	ENSG00000024526.17	DEPDC1
209.466	0.103611	0.159499	0.649599	0.515951	0.999711	ENSG00000024862.17	CCDC28A
575.233	-0.0608152	0.0913167	-0.665981	0.505423	0.999711	ENSG00000025039.14	RRAGD
508.985	-0.0529077	0.0997639	-0.530329	0.595884	0.999711	ENSG00000025156.12	HSF2
1385.49	0.0115424	0.0615652	0.187482	0.851283	0.999711	ENSG00000025293.17	PHF20
11.7259	0.494619	0.6471	0.764362	0.444651	0.999711	ENSG00000025423.11	HSD17B6
62.3954	-0.315809	0.270091	-1.16927	0.242295	0.999711	ENSG00000025434.19	NR1H3
10.3117	-0.246058	0.672686	-0.365784	0.714526	0.999711	ENSG00000025708.14	TYMP
767.822	0.164136	0.0809121	2.02857	0.0425021	0.999711	ENSG00000025770.19	NCAPH2
1146.9	0.0255179	0.0667343	0.38238	0.70218	0.999711	ENSG00000025772.8	TOMM34
1731.98	0.00252695	0.0600856	0.0420558	0.966454	0.999711	ENSG00000025796.14	SEC63
3715.09	-0.157411	0.0607251	-2.59218	0.00953696	0.857111	ENSG00000025800.14	KPNA6
58198.3	0.0604936	0.0287902	2.10119	0.0356247	0.999711	ENSG00000026025.16	VIM
116.299	-0.135439	0.24461	-0.553693	0.579789	0.999711	ENSG00000026036.22	RTEL1-TNFRSF6B
39.6283	-0.224476	0.332503	-0.675109	0.499606	0.999711	ENSG00000026103.22	FAS
90.6662	0.133974	0.220231	0.608334	0.542966	0.999711	ENSG00000026297.15	RNASET2
10681.4	-0.0301877	0.036293	-0.83178	0.405533	0.999711	ENSG00000026508.18	CD44
27.573	-0.0460652	0.403215	-0.114245	0.909044	0.999711	ENSG00000026652.14	AGPAT4
0.331198	1.81271	3.74311	0.484279	0.628188	NA	ENSG00000026751.17	SLAMF7
29.1934	-0.523903	0.393755	-1.33053	0.183344	0.999711	ENSG00000026950.17	BTN3A1
266.743	-0.0706995	0.138188	-0.511617	0.608919	0.999711	ENSG00000027001.10	MIPEP
42.3699	-0.181105	0.320262	-0.565491	0.57174	0.999711	ENSG00000027075.15	PRKCH
323.567	0.0622032	0.121858	0.510456	0.609732	0.999711	ENSG00000027697.14	IFNGR1
200.424	0.0871731	0.15062	0.578761	0.562751	0.999711	ENSG00000027847.14	B4GALT7
25.7464	0.163674	0.423377	0.386592	0.699058	0.999711	ENSG00000027869.11	SH2D2A
527.186	-0.0673982	0.104521	-0.644832	0.519036	0.999711	ENSG00000028116.17	VRK2
84.9633	-0.058003	0.225564	-0.257147	0.797066	0.999711	ENSG00000028137.19	TNFRSF1B
963.529	-0.01202	0.0718002	-0.167409	0.867048	0.999711	ENSG00000028203.18	VEZT
6.33124	0.205408	0.870659	0.235922	0.813493	0.999711	ENSG00000028277.21	POU2F2
720.502	0.0424012	0.08156	0.519877	0.603149	0.999711	ENSG00000028310.18	BRD9
828.026	0.0703112	0.0772599	0.910061	0.36279	0.999711	ENSG00000028528.15	SNX1
420.143	0.0385637	0.109902	0.35089	0.725671	0.999711	ENSG00000028839.10	TBPL1
91.7646	-0.0947297	0.218931	-0.432692	0.665239	0.999711	ENSG00000029153.14	ARNTL2
9728.83	0.0342966	0.0372098	0.921709	0.35668	0.999711	ENSG00000029363.16	BCLAF1
1315.24	-0.0832111	0.0661691	-1.25755	0.208554	0.999711	ENSG00000029364.12	SLC39A9
650.379	0.0426645	0.090123	0.473403	0.635926	0.999711	ENSG00000029534.20	ANK1
152.541	0.0921579	0.177259	0.519905	0.60313	0.999711	ENSG00000029639.11	TFB1M
2184.91	0.0460069	0.0536352	0.857775	0.391017	0.999711	ENSG00000029725.17	RABEP1
2546.46	-0.0541372	0.0482385	-1.12228	0.261743	0.999711	ENSG00000029993.15	HMGB3
2285.2	0.0243114	0.0503714	0.482642	0.62935	0.999711	ENSG00000030066.13	NUP160
572.772	0.0805817	0.0912585	0.883005	0.377234	0.999711	ENSG00000030110.13	BAK1
276.41	-0.229498	0.130599	-1.75727	0.0788711	0.999711	ENSG00000030419.16	IKZF2
810.424	0.125305	0.0763116	1.64202	0.100585	0.999711	ENSG00000030582.18	GRN
942.712	-0.0487076	0.0768431	-0.633857	0.526174	0.999711	ENSG00000031003.10	FAM13B
16.8745	0.163035	0.503217	0.323986	0.745949	0.999711	ENSG00000031081.10	ARHGAP31
479.111	0.00207873	0.107378	0.019359	0.984555	0.999711	ENSG00000031691.7	CENPQ
2109.75	0.0524917	0.0508234	1.03283	0.301685	0.999711	ENSG00000031698.13	SARS
750.014	0.104422	0.0805931	1.29567	0.19509	0.999711	ENSG00000031823.14	RANBP3
675.463	0.0149763	0.0866924	0.172752	0.862847	0.999711	ENSG00000032219.18	ARID4A
490.102	-0.0202884	0.100506	-0.201862	0.840024	0.999711	ENSG00000032389.12	EIPR1
374.169	0.105586	0.11304	0.934055	0.350276	0.999711	ENSG00000032444.16	PNPLA6
274.65	0.0344796	0.135126	0.255167	0.798594	0.999711	ENSG00000032742.17	IFT88
360.58	0.00611439	0.115349	0.0530079	0.957726	0.999711	ENSG00000033011.12	ALG1
608.414	0.134564	0.0916872	1.46764	0.142201	0.999711	ENSG00000033030.13	ZCCHC8
1475.22	-0.0187367	0.0632316	-0.296318	0.766987	0.999711	ENSG00000033050.9	ABCF2
538.911	0.118981	0.105457	1.12823	0.259222	0.999711	ENSG00000033100.16	CHPF2
3.31918	0.288428	1.15757	0.249167	0.803232	0.999711	ENSG00000033122.19	LRRC7
440.776	0.0105003	0.103485	0.101467	0.91918	0.999711	ENSG00000033170.16	FUT8
1340.27	-0.0544131	0.067533	-0.805727	0.4204	0.999711	ENSG00000033178.13	UBA6
24.1385	-0.169569	0.43466	-0.390119	0.696448	0.999711	ENSG00000033327.13	GAB2
336.064	0.05656	0.116401	0.485907	0.627033	0.999711	ENSG00000033627.16	ATP6V0A1
759.446	-0.0666221	0.0813511	-0.818945	0.412818	0.999711	ENSG00000033800.13	PIAS1
595.087	-0.0182267	0.0975575	-0.18683	0.851794	0.999711	ENSG00000033867.16	SLC4A7
103.901	0.116907	0.2196	0.532366	0.594473	0.999711	ENSG00000034053.14	APBA2
740.276	0.257794	0.0871749	2.95721	0.00310438	0.486459	ENSG00000034152.18	MAP2K3
13148.6	0.0293671	0.0397973	0.737917	0.460565	0.999711	ENSG00000034510.6	TMSB10
123.864	0.0814042	0.188183	0.432579	0.665321	0.999711	ENSG00000034533.11	ASTE1
465.495	0.0780439	0.107655	0.724945	0.468486	0.999711	ENSG00000034677.13	RNF19A
511.748	-0.0275533	0.106854	-0.257859	0.796516	0.999711	ENSG00000034693.15	PEX3
668.763	0.0858912	0.0837768	1.02524	0.305251	0.999711	ENSG00000034713.8	GABARAPL2
50.3785	-0.264956	0.293101	-0.903974	0.366009	0.999711	ENSG00000035115.21	SH3YL1
2322.21	0.0326252	0.0571923	0.570447	0.568375	0.999711	ENSG00000035141.8	FAM136A
5795.9	0.0528322	0.0399047	1.32396	0.185517	0.999711	ENSG00000035403.17	VCL
1109.46	0.0242826	0.0700902	0.346448	0.729006	0.999711	ENSG00000035499.13	DEPDC1B
9.91761	-0.337882	0.658399	-0.513188	0.60782	0.999711	ENSG00000035664.11	DAPK2
1056.23	0.00942092	0.0707622	0.133135	0.894087	0.999711	ENSG00000035681.9	NSMAF
943.546	-0.0559003	0.0814422	-0.686381	0.492473	0.999711	ENSG00000035687.10	ADSS
2681.99	0.0278871	0.0469119	0.594458	0.552206	0.999711	ENSG00000035862.12	TIMP2
2787.59	-0.0205425	0.0478609	-0.429212	0.667769	0.999711	ENSG00000035928.16	RFC1
1082.7	0.0272275	0.0735155	0.370364	0.711111	0.999711	ENSG00000036054.13	TBC1D23
2605.7	0.00270733	0.0470163	0.0575829	0.954081	0.999711	ENSG00000036257.13	CUL3
2.55222	-0.680943	1.3177	-0.516767	0.605319	0.999711	ENSG00000036530.8	CYP46A1
1348.46	0.036306	0.0619603	0.585955	0.557906	0.999711	ENSG00000036549.13	AC118549.1
23.6391	-0.016257	0.453116	-0.0358783	0.971379	0.999711	ENSG00000036672.16	USP2
114.961	0.0636418	0.197517	0.322209	0.747294	0.999711	ENSG00000037042.9	TUBG2
998.398	-0.0222353	0.0725378	-0.306534	0.759198	0.999711	ENSG00000037241.7	RPL26L1
0.615117	1.35912	2.77482	0.489805	0.624272	NA	ENSG00000037280.16	FLT4
2970.14	0.0777315	0.0452023	1.71963	0.085499	0.999711	ENSG00000037474.15	NSUN2
468.036	-0.0489815	0.103883	-0.471506	0.637279	0.999711	ENSG00000037637.11	FBXO42
349.59	-0.166778	0.11785	-1.41517	0.15702	0.999711	ENSG00000037749.12	MFAP3
505.093	0.0881061	0.0981376	0.897781	0.369302	0.999711	ENSG00000037757.14	MRI1
155.705	-0.00818682	0.169052	-0.048428	0.961375	0.999711	ENSG00000037897.17	METTL1
137.01	-0.0412081	0.179043	-0.230157	0.817969	0.999711	ENSG00000037965.6	HOXC8
102.429	-0.126487	0.20894	-0.605373	0.544931	0.999711	ENSG00000038002.9	AGA
712.536	-0.200414	0.0951301	-2.10674	0.0351404	0.999711	ENSG00000038210.13	PI4K2B
1174.55	-0.0720577	0.0739184	-0.974827	0.329646	0.999711	ENSG00000038219.13	BOD1L1
1269.23	-0.10834	0.0644323	-1.68145	0.0926754	0.999711	ENSG00000038274.17	MAT2B
0.501226	0.857181	3.01414	0.284386	0.776114	NA	ENSG00000038295.8	TLL1
1640.38	0.0395614	0.0597438	0.662184	0.507853	0.999711	ENSG00000038358.15	EDC4
1709.41	-0.0963955	0.062062	-1.55321	0.120372	0.999711	ENSG00000038382.20	TRIO
1455.25	0.0193764	0.0599412	0.323257	0.746501	0.999711	ENSG00000038427.16	VCAN
190.492	-0.0328486	0.155334	-0.211471	0.83252	0.999711	ENSG00000038532.16	CLEC16A
3309.45	-0.0038658	0.0540705	-0.0714955	0.943003	0.999711	ENSG00000039123.16	MTREX
34.4663	0.0163684	0.377942	0.0433094	0.965455	0.999711	ENSG00000039139.9	DNAH5
1269.55	0.00760059	0.0656636	0.11575	0.90785	0.999711	ENSG00000039319.17	ZFYVE16
648.599	0.126004	0.0908464	1.387	0.165442	0.999711	ENSG00000039523.20	RIPOR1
186.169	0.0665771	0.155065	0.429349	0.667669	0.999711	ENSG00000039560.14	RAI14
0.802838	0.577037	2.37718	0.24274	0.808206	NA	ENSG00000039600.11	SOX30
153.033	0.00379043	0.169149	0.0224088	0.982122	0.999711	ENSG00000039650.12	PNKP
1248.87	-0.0550222	0.0688292	-0.799401	0.424058	0.999711	ENSG00000040199.18	PHLPP2
1243.2	-0.0447919	0.0683782	-0.655061	0.512428	0.999711	ENSG00000040275.17	SPDL1
342.798	0.0104852	0.119387	0.0878252	0.930016	0.999711	ENSG00000040341.18	STAU2
156.132	0.181442	0.171769	1.05631	0.290824	0.999711	ENSG00000040487.13	PQLC2
118.954	-0.213508	0.196789	-1.08496	0.27794	0.999711	ENSG00000040531.14	CTNS
68.0438	-0.010818	0.256838	-0.04212	0.966403	0.999711	ENSG00000040608.14	RTN4R
679.451	0.0848186	0.0831394	1.0202	0.307635	0.999711	ENSG00000040633.13	PHF23
348.776	-0.0910554	0.117297	-0.776279	0.437584	0.999711	ENSG00000040933.15	INPP4A
8518.14	-0.0174033	0.0421228	-0.413157	0.679491	0.999711	ENSG00000041353.10	RAB27B
3169.5	-0.00526425	0.0588123	-0.0895092	0.928677	0.999711	ENSG00000041357.16	PSMA4
1.50573	0.270115	1.73259	0.155902	0.87611	NA	ENSG00000041515.16	MYO16
1971.25	-0.00890096	0.0552879	-0.160993	0.872099	0.999711	ENSG00000041802.11	LSG1
195.39	-0.0291864	0.160884	-0.181413	0.856043	0.999711	ENSG00000041880.14	PARP3
1121.56	0.0888323	0.0705308	1.25948	0.207856	0.999711	ENSG00000041982.16	TNC
186.338	0.13676	0.159694	0.856388	0.391783	0.999711	ENSG00000041988.15	THAP3
5.45291	-0.463291	0.9704	-0.477423	0.633061	0.999711	ENSG00000042062.12	RIPOR3
332.571	-0.108372	0.117442	-0.922768	0.356128	0.999711	ENSG00000042088.13	TDP1
340.022	0.0620954	0.116568	0.532699	0.594242	0.999711	ENSG00000042286.15	AIFM2
44.3806	-0.105951	0.314636	-0.336741	0.736312	0.999711	ENSG00000042317.17	SPATA7
1256.89	-0.0201011	0.0668444	-0.300715	0.763632	0.999711	ENSG00000042429.12	MED17
540.829	0.109839	0.103871	1.05746	0.290302	0.999711	ENSG00000042445.14	RETSAT
440.351	0.05664	0.107043	0.529132	0.596714	0.999711	ENSG00000042493.16	CAPG
2098.42	0.0790958	0.0569586	1.38865	0.164938	0.999711	ENSG00000042753.11	AP2S1
347.762	-0.0501	0.113623	-0.44093	0.659263	0.999711	ENSG00000043039.6	BARX2
1544.01	-0.20436	0.0701618	-2.91269	0.00358328	0.545852	ENSG00000043093.14	DCUN1D1
1799.27	-0.0340479	0.0553239	-0.615429	0.538271	0.999711	ENSG00000043143.20	JADE2
62.5645	-0.128621	0.284163	-0.45263	0.650815	0.999711	ENSG00000043355.12	ZIC2
323.483	-0.0106405	0.124719	-0.0853155	0.932011	0.999711	ENSG00000043514.16	TRIT1
7.20856	0.124693	0.774122	0.161077	0.872033	0.999711	ENSG00000043591.5	ADRB1
387.98	0.0532081	0.108223	0.491653	0.622965	0.999711	ENSG00000044090.8	CUL7
4961.37	0.000285795	0.0387993	0.00736599	0.994123	0.999711	ENSG00000044115.21	CTNNA1
723.156	0.0906127	0.0867362	1.04469	0.296165	0.999711	ENSG00000044446.11	PHKA2
478.215	-0.143605	0.0989794	-1.45085	0.14682	0.999711	ENSG00000044459.15	CNTLN
6.43813	0.157659	0.821518	0.191912	0.847811	0.999711	ENSG00000044524.11	EPHA3
10211.3	0.0872732	0.0321791	2.71211	0.00668559	0.725598	ENSG00000044574.8	HSPA5
185.862	-0.177717	0.15591	-1.13987	0.254339	0.999711	ENSG00000046604.13	DSG2
122.665	-0.0870719	0.194636	-0.447357	0.654617	0.999711	ENSG00000046647.13	GEMIN8
646.536	0.020568	0.084666	0.242931	0.808059	0.999711	ENSG00000046651.15	OFD1
58.5295	-0.141647	0.279224	-0.507288	0.611953	0.999711	ENSG00000046653.15	GPM6B
286.898	0.153962	0.129875	1.18547	0.235833	0.999711	ENSG00000047056.15	WDR37
698.798	-0.0179871	0.0831165	-0.216408	0.82867	0.999711	ENSG00000047188.16	YTHDC2
891.225	0.0136191	0.0745519	0.18268	0.855049	0.999711	ENSG00000047230.15	CTPS2
849.362	-0.0580078	0.0826839	-0.701561	0.482953	0.999711	ENSG00000047249.18	ATP6V1H
3553.58	0.033304	0.0483378	0.688983	0.490834	0.999711	ENSG00000047315.16	POLR2B
113.759	0.111828	0.198124	0.564436	0.572457	0.999711	ENSG00000047346.12	FAM214A
4717.49	-0.0715723	0.0481134	-1.48758	0.136863	0.999711	ENSG00000047410.14	TPR
64.6011	0.140891	0.267832	0.526042	0.598859	0.999711	ENSG00000047457.14	CP
175.611	0.0446272	0.162477	0.274667	0.783572	0.999711	ENSG00000047578.13	KIAA0556
146.827	-0.0264355	0.177758	-0.148716	0.881777	0.999711	ENSG00000047579.19	DTNBP1
831.603	-0.0112458	0.092906	-0.121044	0.903656	0.999711	ENSG00000047621.12	C12orf4
411.114	-0.0464287	0.12466	-0.372443	0.709563	0.999711	ENSG00000047644.18	WWC3
1.37427	-0.784869	1.94031	-0.404507	0.68584	NA	ENSG00000047662.4	FAM184B
3939.93	0.0472749	0.0435905	1.08452	0.278133	0.999711	ENSG00000047849.21	MAP4
775.24	-0.0315444	0.0817819	-0.385714	0.699709	0.999711	ENSG00000047932.14	GOPC
678.138	0.0545357	0.0887296	0.614629	0.5388	0.999711	ENSG00000048028.11	USP28
793.637	-0.0843714	0.0821056	-1.0276	0.30414	0.999711	ENSG00000048052.21	HDAC9
992.474	0.016696	0.0742673	0.224809	0.822128	0.999711	ENSG00000048140.18	TSPAN17
1424.42	0.0356776	0.0654239	0.545329	0.585527	0.999711	ENSG00000048162.20	NOP16
88.7468	-0.0619124	0.223506	-0.277006	0.781776	0.999711	ENSG00000048342.16	CC2D2A
599.999	0.0227247	0.0932391	0.243725	0.807444	0.999711	ENSG00000048392.11	RRM2B
853.093	0.0939243	0.0815765	1.15136	0.249582	0.999711	ENSG00000048405.10	ZNF800
0.363801	-2.00626	3.6117	-0.555489	0.57856	NA	ENSG00000048462.11	TNFRSF17
133.801	0.000751409	0.181647	0.00413665	0.996699	0.999711	ENSG00000048471.14	SNX29
1245.6	0.0197458	0.0690643	0.285904	0.774951	0.999711	ENSG00000048544.6	MRPS10
3465.75	-0.0345327	0.0460373	-0.750103	0.453193	0.999711	ENSG00000048649.13	RSF1
791.799	-0.133406	0.101545	-1.31376	0.188926	0.999711	ENSG00000048707.15	VPS13D
3633.35	0.0764146	0.048123	1.5879	0.112308	0.999711	ENSG00000048828.17	FAM120A
1332.97	0.019868	0.0666185	0.298236	0.765523	0.999711	ENSG00000048991.16	R3HDM1
5.52431	-0.731037	0.897331	-0.81468	0.415256	0.999711	ENSG00000049089.15	COL9A2
2.45701	0.507333	1.33694	0.379473	0.704337	0.999711	ENSG00000049130.15	KITLG
231.655	0.14421	0.141779	1.01715	0.309083	0.999711	ENSG00000049167.14	ERCC8
2.71202	-0.434237	1.249	-0.347669	0.728089	0.999711	ENSG00000049192.15	ADAMTS6
684.15	-0.0603538	0.0946584	-0.637596	0.523737	0.999711	ENSG00000049239.12	H6PD
2649.03	-0.00819299	0.0498675	-0.164295	0.869499	0.999711	ENSG00000049245.13	VAMP3
308.902	-0.225576	0.12643	-1.78419	0.0743926	0.999711	ENSG00000049246.14	PER3
5.68012	-0.697096	0.917943	-0.75941	0.447607	0.999711	ENSG00000049249.8	TNFRSF9
0.694999	-0.114396	2.53122	-0.0451941	0.963953	NA	ENSG00000049283.18	EPN3
31.4063	-0.134779	0.374848	-0.359557	0.719178	0.999711	ENSG00000049323.16	LTBP1
2442.35	-0.0134816	0.0527025	-0.255805	0.798101	0.999711	ENSG00000049449.9	RCN1
2234.8	0.0491774	0.0517357	0.950551	0.341832	0.999711	ENSG00000049541.11	RFC2
1916.26	0.0383544	0.053463	0.7174	0.473127	0.999711	ENSG00000049656.14	CLPTM1L
546.387	0.0364932	0.0919938	0.396692	0.691595	0.999711	ENSG00000049759.18	NEDD4L
4.84217	0.873052	0.974397	0.895992	0.370257	0.999711	ENSG00000049768.15	FOXP3
122.132	0.0450776	0.194323	0.231973	0.816559	0.999711	ENSG00000049769.13	PPP1R3F
2314.81	0.0182537	0.0508286	0.359123	0.719503	0.999711	ENSG00000049860.14	HEXB
372.709	-0.191556	0.111882	-1.71213	0.0868729	0.999711	ENSG00000049883.15	PTCD2
595.351	-0.112417	0.0907654	-1.23854	0.215516	0.999711	ENSG00000050130.18	JKAMP
2.04661	-0.0626972	1.51732	-0.041321	0.96704	0.999711	ENSG00000050165.17	DKK3
1572.29	-0.00316526	0.0595613	-0.0531429	0.957618	0.999711	ENSG00000050344.9	NFE2L3
901.137	-0.0416565	0.0735299	-0.566524	0.571038	0.999711	ENSG00000050393.11	MCUR1
7101.88	-0.0133788	0.0434233	-0.308102	0.758004	0.999711	ENSG00000050405.13	LIMA1
365.299	-0.0174972	0.113692	-0.1539	0.877689	0.999711	ENSG00000050426.16	LETMD1
44.0248	-0.135821	0.33204	-0.409049	0.682504	0.999711	ENSG00000050438.17	SLC4A8
42.5348	0.0551892	0.343606	0.160618	0.872394	0.999711	ENSG00000050555.18	LAMC3
1165.75	-0.0123808	0.0687356	-0.180122	0.857057	0.999711	ENSG00000050748.17	MAPK9
0.550559	0.926078	3.13434	0.295462	0.767641	NA	ENSG00000050767.17	COL23A1
922.757	0.0496138	0.0744525	0.666382	0.505167	0.999711	ENSG00000050820.17	BCAR1
200.926	0.180738	0.152345	1.18637	0.235475	0.999711	ENSG00000051009.10	FAM160A2
558.379	0.262946	0.0927263	2.83572	0.0045722	0.626457	ENSG00000051108.15	HERPUD1
534.665	0.048226	0.100956	0.477694	0.632868	0.999711	ENSG00000051128.19	HOMER3
324.887	-0.0621831	0.121351	-0.512425	0.608353	0.999711	ENSG00000051180.17	RAD51
1055.22	-0.0992202	0.0771105	-1.28673	0.198189	0.999711	ENSG00000051341.14	POLQ
645.734	0.0357056	0.0863886	0.413313	0.679377	0.999711	ENSG00000051382.8	PIK3CB
1188.36	0.0849868	0.0710086	1.19685	0.231364	0.999711	ENSG00000051523.11	CYBA
1641.59	0.05612	0.0573743	0.978138	0.328006	0.999711	ENSG00000051596.9	THOC3
599.269	0.0231097	0.0944298	0.244729	0.806666	0.999711	ENSG00000051620.11	HEBP2
943.666	-0.0114336	0.0715837	-0.159723	0.873099	0.999711	ENSG00000051825.14	MPHOSPH9
126.815	0.0868545	0.190128	0.456821	0.6478	0.999711	ENSG00000052126.14	PLEKHA5
0.33383	1.82258	3.73173	0.488401	0.625266	NA	ENSG00000052344.16	PRSS8
899.3	-0.137302	0.0781477	-1.75695	0.0789257	0.999711	ENSG00000052723.11	SIKE1
1330.19	0.0961355	0.0647285	1.48521	0.137488	0.999711	ENSG00000052749.13	RRP12
57.6218	-0.146673	0.280718	-0.522494	0.601326	0.999711	ENSG00000052795.13	FNIP2
340.554	0.00460924	0.11753	0.0392176	0.968717	0.999711	ENSG00000052802.13	MSMO1
666.499	-0.0178514	0.0836112	-0.213505	0.830933	0.999711	ENSG00000052841.15	TTC17
29.3956	-0.146422	0.397033	-0.368789	0.712285	0.999711	ENSG00000052850.7	ALX4
499.936	-0.122936	0.0966723	-1.27168	0.203486	0.999711	ENSG00000053254.15	FOXN3
645.052	0.0808573	0.0870964	0.928366	0.353218	0.999711	ENSG00000053371.12	AKR7A2
2181.87	0.0449373	0.0513791	0.874622	0.381779	0.999711	ENSG00000053372.5	MRTO4
9.05903	-0.851983	0.762982	-1.11665	0.264144	0.999711	ENSG00000053438.10	NNAT
138.354	-0.0763324	0.1803	-0.423363	0.67203	0.999711	ENSG00000053501.13	USE1
17.288	-0.292196	0.520784	-0.561069	0.574751	0.999711	ENSG00000053524.12	MCF2L2
19.1437	-0.0970997	0.492408	-0.197194	0.843676	0.999711	ENSG00000053702.15	NRIP2
4.29468	-0.473287	1.07967	-0.438362	0.661124	0.999711	ENSG00000053747.16	LAMA3
380.472	-0.0573332	0.115173	-0.4978	0.618625	0.999711	ENSG00000053770.12	AP5M1
398.255	0.0193437	0.107644	0.1797	0.857388	0.999711	ENSG00000053900.10	ANAPC4
66.6812	0.210816	0.266776	0.790238	0.429389	0.999711	ENSG00000053918.16	KCNQ1
1179.79	-0.0188944	0.0659328	-0.286571	0.774441	0.999711	ENSG00000054116.12	TRAPPC3
5646.31	-0.0425162	0.044196	-0.961991	0.336054	0.999711	ENSG00000054118.15	THRAP3
394.065	-0.0541883	0.116587	-0.464787	0.642084	0.999711	ENSG00000054148.17	PHPT1
807.073	-0.00845007	0.0787598	-0.107289	0.91456	0.999711	ENSG00000054267.22	ARID4B
7.53127	0.726237	0.765082	0.949227	0.342505	0.999711	ENSG00000054277.14	OPN3
330.511	-0.00449375	0.123044	-0.0365215	0.970867	0.999711	ENSG00000054282.16	SDCCAG8
16.2506	0.00866722	0.516423	0.0167832	0.98661	0.999711	ENSG00000054392.13	HHAT
1717.46	-0.0335526	0.0625692	-0.536248	0.591787	0.999711	ENSG00000054523.17	KIF1B
268.841	-0.0543822	0.132863	-0.409311	0.682311	0.999711	ENSG00000054598.8	FOXC1
165.26	0.168375	0.166536	1.01104	0.311995	0.999711	ENSG00000054611.14	TBC1D22A
1440.33	-0.194974	0.0850168	-2.29336	0.0218271	0.999711	ENSG00000054654.16	SYNE2
47.3906	-0.210209	0.304951	-0.689321	0.490621	0.999711	ENSG00000054690.13	PLEKHH1
113.275	-0.108987	0.200981	-0.542275	0.587629	0.999711	ENSG00000054793.13	ATP9A
1146.97	0.0156764	0.0787643	0.199029	0.84224	0.999711	ENSG00000054965.10	FAM168A
521.208	0.208729	0.0993076	2.10184	0.0355674	0.999711	ENSG00000054967.13	RELT
156.011	-0.159415	0.182122	-0.875318	0.381401	0.999711	ENSG00000054983.17	GALC
4179.22	0.0754474	0.0431826	1.74717	0.0806074	0.999711	ENSG00000055044.11	NOP58
3948.03	0.0696311	0.0402847	1.72848	0.083903	0.999711	ENSG00000055070.17	SZRD1
36.0895	0.196773	0.350218	0.56186	0.574212	0.999711	ENSG00000055118.14	KCNH2
3679.78	0.0454838	0.0443094	1.02651	0.304654	0.999711	ENSG00000055130.16	CUL1
235.371	-0.174553	0.14754	-1.18309	0.236772	0.999711	ENSG00000055147.19	FAM114A2
13.5982	-0.414818	0.582093	-0.712632	0.476073	0.999711	ENSG00000055163.20	CYFIP2
1090.78	-0.00687944	0.0669979	-0.102681	0.918216	0.999711	ENSG00000055208.19	TAB2
760.804	-0.0793984	0.0833225	-0.952905	0.340638	0.999711	ENSG00000055211.14	GINM1
3457.43	-0.0974902	0.0530877	-1.8364	0.0662988	0.999711	ENSG00000055332.18	EIF2AK2
1260.15	0.122616	0.0669656	1.83103	0.0670958	0.999711	ENSG00000055483.19	USP36
1382.11	-0.299619	0.174101	-1.72095	0.0852606	0.999711	ENSG00000055609.18	KMT2C
35.4015	-0.301088	0.371506	-0.810453	0.41768	0.999711	ENSG00000055732.13	MCOLN3
0.491545	-0.946241	3.26337	-0.289958	0.771848	NA	ENSG00000055813.6	CCDC85A
2482.2	-0.113555	0.0504905	-2.24903	0.0245105	0.999711	ENSG00000055917.15	PUM2
570.381	0.0571671	0.100036	0.571466	0.567684	0.999711	ENSG00000055950.16	MRPL43
3.59799	-2.17394	1.22846	-1.76965	0.0767863	0.999711	ENSG00000055955.16	ITIH4
288.526	-0.041114	0.129352	-0.317846	0.750602	0.999711	ENSG00000056050.7	HPF1
3375.18	0.0252037	0.0440893	0.571651	0.567558	0.999711	ENSG00000056097.16	ZFR
337.085	-0.08649	0.119647	-0.722875	0.469757	0.999711	ENSG00000056277.16	ZNF280C
23.848	-0.171764	0.430677	-0.398824	0.690023	0.999711	ENSG00000056487.16	PHF21B
45.9138	0.0341921	0.315436	0.108396	0.913681	0.999711	ENSG00000056558.11	TRAF1
1908.9	-0.0690033	0.0599925	-1.1502	0.250062	0.999711	ENSG00000056586.16	RC3H2
150.536	-0.00482748	0.172088	-0.0280525	0.97762	0.999711	ENSG00000056736.10	IL17RB
97.974	0.0656935	0.216183	0.303879	0.76122	0.999711	ENSG00000056972.19	TRAF3IP2
1712.98	-0.189255	0.0582226	-3.25054	0.00115185	0.255829	ENSG00000057019.16	DCBLD2
2630.38	-0.0597862	0.0581669	-1.02784	0.304025	0.999711	ENSG00000057252.13	SOAT1
254.984	-0.129096	0.135249	-0.954507	0.339827	0.999711	ENSG00000057294.14	PKP2
1.01857	-1.1573	2.18141	-0.53053	0.595745	NA	ENSG00000057468.7	MSH4
6208.11	0.00540082	0.0458864	0.1177	0.906305	0.999711	ENSG00000057608.17	GDI2
0.694999	-0.114396	2.53122	-0.0451941	0.963953	NA	ENSG00000057657.17	PRDM1
773.28	0.0885507	0.0805765	1.09896	0.271783	0.999711	ENSG00000057663.16	ATG5
8.81436	0.301915	0.719822	0.419429	0.674902	0.999711	ENSG00000057704.13	TMCC3
579.009	0.0166664	0.0933818	0.178476	0.858349	0.999711	ENSG00000057757.10	PITHD1
529.288	0.0725435	0.101613	0.713921	0.475276	0.999711	ENSG00000057935.13	MTA3
1602.07	-0.0433474	0.0571911	-0.757939	0.448488	0.999711	ENSG00000058056.9	USP13
1817.46	0.0195392	0.0575846	0.339314	0.734373	0.999711	ENSG00000058063.16	ATP11B
1.36568	-0.833942	1.74228	-0.478651	0.632187	NA	ENSG00000058091.17	CDK14
6573.98	0.0815157	0.0352016	2.31568	0.0205756	0.999711	ENSG00000058262.10	SEC61A1
1382.78	-0.0353954	0.0601556	-0.588398	0.556265	0.999711	ENSG00000058272.19	PPP1R12A
2.19752	-0.316393	1.38378	-0.228644	0.819146	0.999711	ENSG00000058335.15	RASGRF1
70.3261	0.199716	0.253418	0.788089	0.430645	0.999711	ENSG00000058404.20	CAMK2B
207.399	-0.0101566	0.149186	-0.0680799	0.945722	0.999711	ENSG00000058453.17	CROCC
283.825	0.0836885	0.129121	0.648142	0.516893	0.999711	ENSG00000058600.16	POLR3E
2373.07	-0.00164656	0.0563955	-0.0291966	0.976708	0.999711	ENSG00000058668.14	ATP2B4
3784.82	0.0444588	0.0502619	0.884542	0.376403	0.999711	ENSG00000058673.16	ZC3H11A
999.28	-0.0663951	0.0776516	-0.855038	0.39253	0.999711	ENSG00000058729.11	RIOK2
287.059	-0.0712146	0.130346	-0.546349	0.584826	0.999711	ENSG00000058799.15	YIPF1
2738.52	-0.0526299	0.0512136	-1.02765	0.304112	0.999711	ENSG00000058804.12	NDC1
0.306875	-0.0687592	3.8969	-0.0176446	0.985922	NA	ENSG00000058866.15	DGKG
297.604	0.0940631	0.132198	0.711533	0.476754	0.999711	ENSG00000059122.16	FLYWCH1
157.187	-0.0239692	0.17103	-0.140146	0.888545	0.999711	ENSG00000059145.18	UNKL
1.01915	-0.104931	2.04744	-0.05125	0.959126	NA	ENSG00000059377.17	TBXAS1
136.748	0.0642422	0.180935	0.355057	0.722547	0.999711	ENSG00000059378.12	PARP12
1981.01	0.0408568	0.0525742	0.777126	0.437085	0.999711	ENSG00000059573.9	ALDH18A1
495.97	0.0538738	0.102346	0.526389	0.598618	0.999711	ENSG00000059588.10	TARBP1
262.98	0.156911	0.133444	1.17585	0.239654	0.999711	ENSG00000059691.12	GATB
187.009	0.226794	0.162625	1.39459	0.16314	0.999711	ENSG00000059728.11	MXD1
382.484	0.0232581	0.113655	0.204637	0.837855	0.999711	ENSG00000059758.8	CDK17
274.399	0.032901	0.131909	0.249422	0.803034	0.999711	ENSG00000059769.20	DNAJC25
1287.72	0.0558151	0.0661287	0.844037	0.398649	0.999711	ENSG00000059804.16	SLC2A3
2.95938	1.009	1.25101	0.806543	0.41993	0.999711	ENSG00000059915.17	PSD
528.761	0.0302629	0.0966768	0.313031	0.754257	0.999711	ENSG00000060069.16	CTDP1
3326.57	0.0920831	0.0435557	2.11415	0.0345028	0.999711	ENSG00000060138.13	YBX3
1.18658	2.46413	2.12536	1.1594	0.246295	NA	ENSG00000060140.9	STYK1
4022.81	-0.0625786	0.0588934	-1.06258	0.287975	0.999711	ENSG00000060237.17	WNK1
0.650771	-1.51465	2.72539	-0.555753	0.57838	NA	ENSG00000060303.5	RPS17P5
2818.96	-0.046232	0.0461073	-1.0027	0.316004	0.999711	ENSG00000060339.14	CCAR1
608.743	0.0846873	0.0870557	0.972795	0.330655	0.999711	ENSG00000060491.16	OGFR
0.72001	-1.61596	2.64123	-0.61182	0.540657	NA	ENSG00000060558.3	GNA15
109.314	-0.0949632	0.201225	-0.471926	0.63698	0.999711	ENSG00000060642.10	PIGV
112.614	0.113322	0.222546	0.509208	0.610607	0.999711	ENSG00000060656.20	PTPRU
1695.33	-0.000548153	0.058977	-0.00929435	0.992584	0.999711	ENSG00000060688.13	SNRNP40
1584.81	-0.0649699	0.0694281	-0.935787	0.349383	0.999711	ENSG00000060749.15	QSER1
96.3331	0.124391	0.221978	0.560374	0.575224	0.999711	ENSG00000060762.19	MPC1
241.614	-0.0843944	0.141363	-0.597007	0.550503	0.999711	ENSG00000060971.18	ACAA1
15.3401	-0.40813	0.548129	-0.744589	0.45652	0.999711	ENSG00000060982.15	BCAT1
237.038	0.0705845	0.140258	0.503248	0.61479	0.999711	ENSG00000061273.18	HDAC7
87.1402	0.0581946	0.224117	0.259662	0.795125	0.999711	ENSG00000061337.15	LZTS1
21.3165	0.147073	0.451243	0.32593	0.744478	0.999711	ENSG00000061455.11	PRDM6
21.2285	0.0812749	0.454516	0.178816	0.858082	0.999711	ENSG00000061656.9	SPAG4
4491.99	0.0208057	0.0465228	0.447215	0.65472	0.999711	ENSG00000061676.15	NCKAP1
2764.76	0.0213923	0.0530352	0.403361	0.686683	0.999711	ENSG00000061794.13	MRPS35
758.354	0.034035	0.0812774	0.418751	0.675398	0.999711	ENSG00000061936.9	SFSWAP
223.202	0.102291	0.152869	0.669141	0.503405	0.999711	ENSG00000061938.18	TNK2
635.676	0.0168363	0.0907169	0.185592	0.852765	0.999711	ENSG00000061987.16	MON2
2.33854	-0.481664	1.33446	-0.360941	0.718143	0.999711	ENSG00000062038.14	CDH3
1887.36	-0.070796	0.0536685	-1.31914	0.187124	0.999711	ENSG00000062194.16	GPBP1
219.936	0.076666	0.145459	0.527063	0.59815	0.999711	ENSG00000062282.15	DGAT2
76.9574	-0.221879	0.249561	-0.889075	0.373963	0.999711	ENSG00000062370.16	ZNF112
2749.6	0.0227461	0.0490439	0.463791	0.642797	0.999711	ENSG00000062485.19	CS
0.986141	-0.998291	2.21408	-0.450883	0.652074	NA	ENSG00000062524.16	LTK
1162.16	0.0522378	0.0721053	0.724466	0.46878	0.999711	ENSG00000062582.14	MRPS24
341.192	0.0305809	0.123541	0.247537	0.804493	0.999711	ENSG00000062598.18	ELMO2
2803.06	-0.00960417	0.0507917	-0.189089	0.850023	0.999711	ENSG00000062650.19	WAPL
3655.85	0.0819148	0.0444056	1.84469	0.065082	0.999711	ENSG00000062716.13	VMP1
734.484	0.0145026	0.0836318	0.17341	0.862329	0.999711	ENSG00000062725.10	APPBP2
572.716	0.0683512	0.103393	0.661081	0.50856	0.999711	ENSG00000062822.13	POLD1
1.32907	-0.020183	1.74075	-0.0115944	0.990749	NA	ENSG00000063015.19	SEZ6
6215.08	-0.0581969	0.0352371	-1.65158	0.0986199	0.999711	ENSG00000063046.17	EIF4B
18.2978	-0.0814354	0.504289	-0.161486	0.871711	0.999711	ENSG00000063127.15	SLC6A16
46.5081	0.0713188	0.306148	0.232955	0.815796	0.999711	ENSG00000063169.10	BICRA
96.0182	-0.0748911	0.230066	-0.32552	0.744788	0.999711	ENSG00000063176.15	SPHK2
10826	0.0134399	0.0395458	0.339856	0.733965	0.999711	ENSG00000063177.13	RPL18
81.6592	0.332337	0.239136	1.38974	0.164607	0.999711	ENSG00000063180.9	CA11
611.046	0.0728811	0.0892789	0.816331	0.414311	0.999711	ENSG00000063241.8	ISOC2
4340.89	0.0772998	0.0393063	1.9666	0.0492295	0.999711	ENSG00000063244.12	U2AF2
815.866	0.0443849	0.078955	0.562154	0.574011	0.999711	ENSG00000063245.14	EPN1
652.595	-0.00387116	0.0868445	-0.0445758	0.964445	0.999711	ENSG00000063322.14	MED29
1.79872	-1.33741	1.75348	-0.762718	0.445632	0.999711	ENSG00000063438.17	AHRR
449.351	0.130948	0.106386	1.23087	0.218371	0.999711	ENSG00000063587.14	ZNF275
648.385	0.00346289	0.0882246	0.0392509	0.96869	0.999711	ENSG00000063601.17	MTMR1
623.39	0.0742238	0.0887385	0.836432	0.402912	0.999711	ENSG00000063660.9	GPC1
90.0268	0.0559828	0.225561	0.248193	0.803985	0.999711	ENSG00000063761.16	ADCK1
239.03	-0.0629859	0.141703	-0.444493	0.656686	0.999711	ENSG00000063854.13	HAGH
1570.52	0.0658037	0.0589209	1.11681	0.264074	0.999711	ENSG00000063978.16	RNF4
1329.38	0.0103134	0.0632362	0.163094	0.870445	0.999711	ENSG00000064012.21	CASP8
21.4152	-0.275272	0.454036	-0.606279	0.54433	0.999711	ENSG00000064042.18	LIMCH1
2061.43	0.0637254	0.0537303	1.18602	0.235613	0.999711	ENSG00000064102.15	INTS13
916.328	0.000871053	0.0754522	0.0115444	0.990789	0.999711	ENSG00000064115.11	TM7SF3
340.816	-0.0808329	0.117522	-0.687812	0.491571	0.999711	ENSG00000064199.6	SPA17
5.26165	-0.0649454	0.894291	-0.0726222	0.942107	0.999711	ENSG00000064225.12	ST3GAL6
2.69114	-2.18231	1.41284	-1.54462	0.122438	0.999711	ENSG00000064270.12	ATP2C2
20.578	0.372992	0.488215	0.763991	0.444872	0.999711	ENSG00000064300.9	NGFR
44.1766	-0.247326	0.322085	-0.76789	0.442552	0.999711	ENSG00000064309.14	CDON
1169.7	0.0376739	0.0682062	0.552352	0.580707	0.999711	ENSG00000064313.12	TAF2
216.408	-0.130633	0.151501	-0.86226	0.388544	0.999711	ENSG00000064393.16	HIPK2
3415.33	0.0396884	0.045729	0.867906	0.385446	0.999711	ENSG00000064419.13	TNPO3
57.4583	-0.225087	0.325494	-0.691523	0.489237	0.999711	ENSG00000064489.22	BORCS8-MEF2B
451.297	0.0381259	0.100717	0.378544	0.705027	0.999711	ENSG00000064490.14	RFXANK
256.932	0.0300226	0.132618	0.226384	0.820903	0.999711	ENSG00000064545.14	TMEM161A
23.4349	0.159726	0.450027	0.354925	0.722646	0.999711	ENSG00000064547.14	LPAR2
884.341	0.0522954	0.0739567	0.707108	0.479499	0.999711	ENSG00000064601.18	CTSA
2034.49	-0.0387228	0.0612895	-0.631802	0.527516	0.999711	ENSG00000064607.17	SUGP2
535.971	0.0299901	0.0975789	0.307342	0.758583	0.999711	ENSG00000064651.14	SLC12A2
219.614	0.0704625	0.150539	0.468069	0.639735	0.999711	ENSG00000064652.11	SNX24
3.2334	0.205167	1.20675	0.170016	0.864998	0.999711	ENSG00000064655.19	EYA2
3104.33	0.0348678	0.0484403	0.719811	0.471641	0.999711	ENSG00000064666.15	CNN2
79.859	0.255208	0.241023	1.05885	0.289666	0.999711	ENSG00000064687.12	ABCA7
797.725	-0.0438932	0.0776362	-0.56537	0.571822	0.999711	ENSG00000064703.12	DDX20
1641.41	0.0227464	0.0579777	0.39233	0.694814	0.999711	ENSG00000064726.9	BTBD1
24.8306	0.00473311	0.422825	0.011194	0.991069	0.999711	ENSG00000064763.11	FAR2
22.0051	-0.114177	0.498148	-0.229202	0.818712	0.999711	ENSG00000064787.13	BCAS1
1.77501	0.227011	1.65208	0.13741	0.890707	0.999711	ENSG00000064886.14	CHI3L2
397.433	0.153761	0.123502	1.24501	0.213127	0.999711	ENSG00000064932.16	SBNO2
395.174	-0.057762	0.113714	-0.507957	0.611484	0.999711	ENSG00000064933.17	PMS1
856.373	0.0701671	0.0778613	0.901181	0.367492	0.999711	ENSG00000064961.19	HMG20B
600.654	0.0963447	0.0890194	1.08229	0.279124	0.999711	ENSG00000064995.17	TAF11
319.335	-0.0424667	0.124742	-0.340436	0.733528	0.999711	ENSG00000064999.15	ANKS1A
2128.55	0.0741052	0.0538195	1.37692	0.168536	0.999711	ENSG00000065000.17	AP3D1
227.097	0.049353	0.14376	0.343301	0.731372	0.999711	ENSG00000065029.15	ZNF76
159.133	0.244535	0.167898	1.45645	0.145267	0.999711	ENSG00000065054.14	SLC9A3R2
177.037	0.0428389	0.160399	0.267078	0.789409	0.999711	ENSG00000065057.8	NTHL1
1258.2	0.0187742	0.0744699	0.252104	0.80096	0.999711	ENSG00000065060.17	UHRF1BP1
4012.53	-0.00871638	0.0437621	-0.199177	0.842125	0.999711	ENSG00000065135.11	GNAI3
5820.74	0.0176222	0.0379852	0.463924	0.642702	0.999711	ENSG00000065150.19	IPO5
4023.67	-0.00058033	0.0442787	-0.0131063	0.989543	0.999711	ENSG00000065154.11	OAT
2355.81	-0.0428814	0.0525487	-0.816033	0.414481	0.999711	ENSG00000065183.16	WDR3
2062.36	-0.0102861	0.0566792	-0.18148	0.855991	0.999711	ENSG00000065243.20	PKN2
575.978	-0.00403022	0.0898525	-0.0448537	0.964224	0.999711	ENSG00000065268.10	WDR18
1111.93	-0.00184833	0.0736602	-0.0250927	0.979981	0.999711	ENSG00000065308.5	TRAM2
237.67	0.0329334	0.148732	0.221427	0.82476	0.999711	ENSG00000065320.9	NTN1
1348.53	-0.048902	0.0618216	-0.791017	0.428934	0.999711	ENSG00000065328.16	MCM10
22.785	0.357388	0.450271	0.793716	0.427361	0.999711	ENSG00000065357.20	DGKA
24.3407	-0.122689	0.428361	-0.286414	0.774561	0.999711	ENSG00000065361.15	ERBB3
0.324149	-0.0687597	3.81639	-0.018017	0.985625	NA	ENSG00000065371.17	ROPN1
76.7383	0.0934903	0.244638	0.382158	0.702345	0.999711	ENSG00000065413.20	ANKRD44
6181.03	0.0127896	0.0405335	0.315532	0.752357	0.999711	ENSG00000065427.14	KARS
477.154	-0.0818137	0.100237	-0.816207	0.414382	0.999711	ENSG00000065457.10	ADAT1
393.064	0.10097	0.111814	0.903013	0.366519	0.999711	ENSG00000065485.20	PDIA5
218.916	0.0287096	0.147906	0.194107	0.846092	0.999711	ENSG00000065491.8	TBC1D22B
1315.17	0.0255547	0.0683445	0.37391	0.708471	0.999711	ENSG00000065518.8	NDUFB4
1112.16	-0.00688711	0.0836791	-0.0823038	0.934405	0.999711	ENSG00000065526.11	SPEN
12.1215	-0.186189	0.602477	-0.309039	0.757292	0.999711	ENSG00000065534.18	MYLK
2853.67	0.0111407	0.0533771	0.208716	0.83467	0.999711	ENSG00000065548.18	ZC3H15
1026.43	-0.046697	0.0740085	-0.630969	0.528061	0.999711	ENSG00000065559.15	MAP2K4
176.336	-0.0468912	0.159459	-0.294065	0.768708	0.999711	ENSG00000065600.12	TMEM206
4090.26	0.0191441	0.0472985	0.404751	0.685661	0.999711	ENSG00000065613.14	SLK
396.88	-0.0235507	0.112977	-0.208456	0.834873	0.999711	ENSG00000065615.14	CYB5R4
407.31	-0.0531454	0.107699	-0.493464	0.621685	0.999711	ENSG00000065618.20	COL17A1
7.03416	0.700022	0.797645	0.877611	0.380155	0.999711	ENSG00000065621.15	GSTO2
133.5	0.00248704	0.190485	0.0130564	0.989583	0.999711	ENSG00000065665.21	SEC61A2
43.2989	-0.0722563	0.327298	-0.220766	0.825275	0.999711	ENSG00000065717.15	TLE2
341.995	0.00893564	0.117836	0.075831	0.939554	0.999711	ENSG00000065802.12	ASB1
97.1893	0.278665	0.21456	1.29877	0.194022	0.999711	ENSG00000065809.13	FAM107B
339.514	0.0158469	0.120587	0.131415	0.895447	0.999711	ENSG00000065833.9	ME1
293.311	0.0358093	0.127411	0.281054	0.778669	0.999711	ENSG00000065882.16	TBC1D1
949.632	-0.0199434	0.077421	-0.257597	0.796718	0.999711	ENSG00000065883.16	CDK13
5257.29	0.00241058	0.0399992	0.0602658	0.951944	0.999711	ENSG00000065911.12	MTHFD2
836.251	-0.0669784	0.0898006	-0.745857	0.455754	0.999711	ENSG00000065923.10	SLC9A7
411.214	0.00996227	0.116565	0.0854656	0.931891	0.999711	ENSG00000065970.9	FOXJ2
20676.2	0.0599225	0.0313165	1.91345	0.0556909	0.999711	ENSG00000065978.19	YBX1
22.2231	0.497505	0.447781	1.11104	0.26655	0.999711	ENSG00000065989.16	AC011529.1
931.449	0.0210194	0.0776392	0.270733	0.786597	0.999711	ENSG00000066027.12	PPP2R5A
0.527603	0.847884	2.96406	0.286055	0.774836	NA	ENSG00000066032.18	CTNNA2
2174.79	0.00114631	0.0508128	0.0225594	0.982002	0.999711	ENSG00000066044.15	ELAVL1
0.501226	0.857181	3.01414	0.284386	0.776114	NA	ENSG00000066056.14	TIE1
728.837	-0.0277431	0.0871929	-0.31818	0.750348	0.999711	ENSG00000066084.13	DIP2B
1553.52	0.1066	0.0582698	1.82942	0.0673373	0.999711	ENSG00000066117.14	SMARCD1
710.76	-0.0266451	0.0861239	-0.309381	0.757032	0.999711	ENSG00000066135.13	KDM4A
521.879	0.0154548	0.0948072	0.163013	0.870508	0.999711	ENSG00000066136.20	NFYC
13.1267	-0.0118917	0.641829	-0.0185279	0.985218	0.999711	ENSG00000066185.13	ZMYND12
103.989	0.443831	0.214003	2.07395	0.0380837	0.999711	ENSG00000066230.11	SLC9A3
50.1663	-0.0976973	0.297703	-0.32817	0.742783	0.999711	ENSG00000066248.15	NGEF
5158.7	-0.0056479	0.0381228	-0.14815	0.882224	0.999711	ENSG00000066279.18	ASPM
1489.76	-0.0250673	0.0621318	-0.403454	0.686614	0.999711	ENSG00000066322.15	ELOVL1
255.068	0.0885084	0.143479	0.616875	0.537317	0.999711	ENSG00000066379.15	ZNRD1
0.668045	-1.55422	2.54744	-0.610112	0.541787	NA	ENSG00000066382.16	MPPED2
0.648717	0.0188048	2.58803	0.00726608	0.994203	NA	ENSG00000066405.13	CLDN18
925.581	0.0775526	0.0747963	1.03685	0.299806	0.999711	ENSG00000066422.4	ZBTB11
213.306	-0.113699	0.147704	-0.769777	0.441432	0.999711	ENSG00000066427.22	ATXN3
726.885	0.0163265	0.0824165	0.198097	0.842969	0.999711	ENSG00000066455.13	GOLGA5
28.7934	-0.0888336	0.385755	-0.230285	0.81787	0.999711	ENSG00000066468.22	FGFR2
878.223	-0.0241372	0.0826541	-0.292027	0.770266	0.999711	ENSG00000066557.6	LRRC40
130.51	0.0529204	0.189892	0.278687	0.780485	0.999711	ENSG00000066583.12	ISOC1
185.085	-0.0825161	0.164175	-0.502611	0.615237	0.999711	ENSG00000066629.17	EML1
367.291	0.0565149	0.115035	0.491284	0.623225	0.999711	ENSG00000066651.20	TRMT11
1116.63	0.0760716	0.0683811	1.11247	0.265938	0.999711	ENSG00000066654.14	THUMPD1
566.5	-0.00293075	0.0903307	-0.0324447	0.974117	0.999711	ENSG00000066697.14	MSANTD3
200.035	0.172739	0.156039	1.10703	0.268281	0.999711	ENSG00000066735.14	KIF26A
553.602	-0.00658079	0.096754	-0.0680157	0.945773	0.999711	ENSG00000066739.12	ATG2B
638.886	-0.0336821	0.100109	-0.336455	0.736528	0.999711	ENSG00000066777.9	ARFGEF1
64.2848	-0.208986	0.270324	-0.773093	0.439467	0.999711	ENSG00000066827.16	ZFAT
905.56	0.0424583	0.0768312	0.552618	0.580525	0.999711	ENSG00000066855.16	MTFR1
35.5943	-0.158723	0.379414	-0.418336	0.675702	0.999711	ENSG00000066923.17	STAG3
794.157	-0.0469936	0.0787955	-0.5964	0.550908	0.999711	ENSG00000066926.11	FECH
646.686	-0.0443213	0.0857408	-0.516922	0.605211	0.999711	ENSG00000066933.16	MYO9A
2025.29	0.059285	0.0517647	1.14528	0.252093	0.999711	ENSG00000067057.17	PFKP
779.755	0.111514	0.0838476	1.32996	0.183532	0.999711	ENSG00000067064.11	IDI1
414.684	-0.0643886	0.105914	-0.607932	0.543233	0.999711	ENSG00000067066.17	SP100
2621.45	0.0721537	0.0482562	1.49522	0.134857	0.999711	ENSG00000067082.15	KLF6
339.991	-0.100429	0.122444	-0.820207	0.412098	0.999711	ENSG00000067113.17	PLPP1
146.649	0.166572	0.174202	0.9562	0.338971	0.999711	ENSG00000067141.17	NEO1
1547.47	0.0356742	0.0647902	0.550611	0.5819	0.999711	ENSG00000067167.8	TRAM1
391.605	0.0424787	0.108238	0.392458	0.69472	0.999711	ENSG00000067177.15	PHKA1
1042.96	0.0565294	0.0738899	0.765048	0.444243	0.999711	ENSG00000067182.7	TNFRSF1A
73.3398	0.0750285	0.250378	0.299661	0.764435	0.999711	ENSG00000067191.16	CACNB1
313.407	-0.202473	0.139447	-1.45197	0.14651	0.999711	ENSG00000067208.14	EVI5
56.5054	-0.0460925	0.278809	-0.165319	0.868693	0.999711	ENSG00000067221.14	STOML1
22755.8	0.0830247	0.0289268	2.87016	0.00410264	0.59391	ENSG00000067225.18	PKM
1912.98	-0.0219425	0.0557029	-0.39392	0.69364	0.999711	ENSG00000067248.10	DHX29
6111.21	0.0543903	0.0436783	1.24525	0.213041	0.999711	ENSG00000067334.14	DNTTIP2
173.098	-0.0425557	0.169984	-0.250351	0.802316	0.999711	ENSG00000067365.14	METTL22
1263.03	-0.0412757	0.0714759	-0.577477	0.563617	0.999711	ENSG00000067369.13	TP53BP1
1.18237	0.272867	2.03539	0.134061	0.893354	NA	ENSG00000067445.20	TRO
782.842	-0.000598179	0.0804579	-0.00743468	0.994068	0.999711	ENSG00000067533.6	RRP15
7021.41	0.00363522	0.0382216	0.0951089	0.924228	0.999711	ENSG00000067560.11	RHOA
1586.28	-0.0678012	0.0623938	-1.08667	0.277185	0.999711	ENSG00000067596.11	DHX8
55.5871	0.113069	0.292115	0.387069	0.698705	0.999711	ENSG00000067601.8	PMS2P4
220.055	0.0848094	0.150264	0.564403	0.57248	0.999711	ENSG00000067606.17	PRKCZ
3236.67	-0.0207307	0.0485865	-0.426677	0.669614	0.999711	ENSG00000067704.10	IARS2
352.848	0.0739505	0.113779	0.649948	0.515726	0.999711	ENSG00000067715.14	SYT1
540.207	0.00428493	0.0938716	0.0456467	0.963592	0.999711	ENSG00000067829.19	IDH3G
90.4889	0.0671983	0.221131	0.303885	0.761216	0.999711	ENSG00000067836.12	ROGDI
222.794	0.212699	0.150522	1.41307	0.157634	0.999711	ENSG00000067840.12	PDZD4
2338.22	0.0665333	0.0512826	1.29738	0.194499	0.999711	ENSG00000067900.8	ROCK1
2856.08	-0.0664103	0.0565483	-1.1744	0.240235	0.999711	ENSG00000067955.14	CBFB
508.602	-0.04669	0.0980739	-0.47607	0.634025	0.999711	ENSG00000067992.14	PDK3
504.765	0.135946	0.0972744	1.39755	0.162249	0.999711	ENSG00000068001.14	HYAL2
299.854	0.0274933	0.125889	0.218394	0.827122	0.999711	ENSG00000068024.16	HDAC4
200.939	0.172307	0.151852	1.1347	0.2565	0.999711	ENSG00000068028.17	RASSF1
237.357	0.0814746	0.142742	0.570783	0.568147	0.999711	ENSG00000068078.18	FGFR3
89.306	-0.0507897	0.223287	-0.227464	0.820063	0.999711	ENSG00000068079.7	IFI35
266.702	-0.134739	0.135818	-0.992057	0.32117	0.999711	ENSG00000068097.14	HEATR6
712.255	0.121668	0.0853175	1.42606	0.153852	0.999711	ENSG00000068120.15	COASY
140.12	0.131148	0.176938	0.741208	0.458568	0.999711	ENSG00000068137.15	PLEKHH3
402.421	-0.140764	0.108247	-1.30039	0.193466	0.999711	ENSG00000068305.17	MEF2A
1255.66	0.0961678	0.0632403	1.52067	0.128342	0.999711	ENSG00000068308.13	OTUD5
824.165	0.143731	0.0799457	1.79786	0.0721996	0.999711	ENSG00000068323.17	TFE3
228.998	0.0418445	0.143381	0.291841	0.770408	0.999711	ENSG00000068354.16	TBC1D25
166.161	0.174296	0.181972	0.957816	0.338156	0.999711	ENSG00000068366.19	ACSL4
470.973	-0.000747595	0.0987582	-0.00756995	0.99396	0.999711	ENSG00000068383.19	INPP5A
629.282	-0.0927282	0.0887832	-1.04443	0.296285	0.999711	ENSG00000068394.11	GPKOW
558.664	-0.0232548	0.0916342	-0.253779	0.799667	0.999711	ENSG00000068400.13	GRIPAP1
793.819	0.0589516	0.0843038	0.699276	0.484379	0.999711	ENSG00000068438.15	FTSJ1
1921.28	-0.0616485	0.0529638	-1.16397	0.244435	0.999711	ENSG00000068489.12	PRR11
10.7586	0.0451083	0.641314	0.0703372	0.943925	0.999711	ENSG00000068615.18	REEP1
356.666	-0.00490815	0.116877	-0.0419943	0.966503	0.999711	ENSG00000068650.18	ATP11A
1737.21	0.027286	0.0594179	0.459222	0.646075	0.999711	ENSG00000068654.16	POLR1A
2125.82	0.0109747	0.0534699	0.205251	0.837376	0.999711	ENSG00000068697.7	LAPTM4A
296.461	0.0198602	0.128713	0.154299	0.877374	0.999711	ENSG00000068724.16	TTC7A
617.885	0.112418	0.0914872	1.22879	0.219151	0.999711	ENSG00000068745.15	IP6K2
570.23	-0.0973122	0.10063	-0.967033	0.333527	0.999711	ENSG00000068784.13	SRBD1
1595.8	0.0376617	0.0577839	0.651768	0.514551	0.999711	ENSG00000068796.16	KIF2A
3.05212	0.126368	1.20983	0.104451	0.916811	0.999711	ENSG00000068831.19	RASGRP2
3307.85	0.0364292	0.049278	0.739259	0.45975	0.999711	ENSG00000068878.15	PSME4
359.077	-0.0352469	0.112261	-0.313973	0.753541	0.999711	ENSG00000068885.15	IFT80
451.524	0.126452	0.102706	1.2312	0.218247	0.999711	ENSG00000068903.20	SIRT2
702.873	-0.0184554	0.0817153	-0.22585	0.821318	0.999711	ENSG00000068912.14	ERLEC1
42.1377	-0.00148615	0.327755	-0.00453434	0.996382	0.999711	ENSG00000068971.14	PPP2R5B
3.59586	-1.16048	1.13584	-1.02169	0.306926	0.999711	ENSG00000068976.14	PYGM
424.109	-0.0722423	0.106209	-0.680189	0.496385	0.999711	ENSG00000069011.16	PITX1
2.97518	-0.577597	1.3697	-0.421695	0.673248	0.999711	ENSG00000069122.19	ADGRF5
0.684355	1.41353	2.52902	0.558924	0.576213	NA	ENSG00000069188.17	SDK2
1550.31	-0.00772656	0.0575377	-0.134287	0.893176	0.999711	ENSG00000069248.12	NUP133
9918.35	-0.138623	0.0414766	-3.34219	0.000831207	0.211658	ENSG00000069275.13	NUCKS1
5985.38	0.019266	0.0399159	0.482664	0.629335	0.999711	ENSG00000069329.17	VPS35
2920.44	-0.00217998	0.0472932	-0.0460951	0.963234	0.999711	ENSG00000069345.12	DNAJA2
39.9175	-0.173514	0.328646	-0.527965	0.597523	0.999711	ENSG00000069399.15	BCL3
141.69	0.183499	0.183671	0.999062	0.317764	0.999711	ENSG00000069424.14	KCNAB2
0.324149	-0.0687597	3.81639	-0.018017	0.985625	NA	ENSG00000069431.11	ABCC9
940.502	0.0998887	0.0731818	1.36494	0.172272	0.999711	ENSG00000069482.7	GAL
19.0556	-0.400332	0.481364	-0.831661	0.405601	0.999711	ENSG00000069493.15	CLEC2D
5.91968	0.140098	0.858543	0.163181	0.870376	0.999711	ENSG00000069667.16	RORA
3.00755	-1.46126	1.26073	-1.15905	0.246434	0.999711	ENSG00000069696.6	DRD4
213.7	-0.0584159	0.145964	-0.400209	0.689003	0.999711	ENSG00000069702.11	TGFBR3
46.293	0.162622	0.312793	0.519903	0.603131	0.999711	ENSG00000069812.11	HES2
3195.55	0.0409096	0.0445836	0.917594	0.358831	0.999711	ENSG00000069849.11	ATP1B3
1066.76	0.0280424	0.0711285	0.39425	0.693396	0.999711	ENSG00000069869.16	NEDD4
127.326	-0.139267	0.189372	-0.735416	0.462086	0.999711	ENSG00000069943.10	PIGB
1872.69	0.0866526	0.0564919	1.53389	0.125056	0.999711	ENSG00000069956.12	MAPK6
262.912	0.14915	0.137457	1.08507	0.27789	0.999711	ENSG00000069966.18	GNB5
208.466	-0.0132208	0.155408	-0.0850718	0.932204	0.999711	ENSG00000069974.16	RAB27A
742.377	0.0778258	0.0809949	0.960874	0.336616	0.999711	ENSG00000069998.12	HDHD5
1536.39	0.0202485	0.0630026	0.321392	0.747913	0.999711	ENSG00000070010.19	UFD1
1226.57	0.000440701	0.0672957	0.00654873	0.994775	0.999711	ENSG00000070018.9	LRP6
14.0588	-0.212297	0.553414	-0.383613	0.701265	0.999711	ENSG00000070019.5	GUCY2C
0.467626	2.32394	3.25146	0.714739	0.474771	NA	ENSG00000070031.4	SCT
601.5	0.158106	0.0877615	1.80154	0.0716184	0.999711	ENSG00000070047.12	PHRF1
1578.15	-0.005327	0.057046	-0.0933808	0.925601	0.999711	ENSG00000070061.15	ELP1
2372.64	0.00328355	0.0550211	0.059678	0.952412	0.999711	ENSG00000070081.16	NUCB2
5390.85	-0.0303077	0.0379551	-0.798516	0.424571	0.999711	ENSG00000070087.14	PFN2
358.049	-0.175008	0.117851	-1.485	0.137545	0.999711	ENSG00000070159.14	PTPN3
2.1712	-0.168555	1.51997	-0.110894	0.9117	0.999711	ENSG00000070182.20	SPTB
484.841	0.0172349	0.0967575	0.178124	0.858625	0.999711	ENSG00000070214.16	SLC44A1
113.396	-0.0371888	0.213855	-0.173897	0.861946	0.999711	ENSG00000070269.14	TMEM260
574.209	0.100798	0.102714	0.98135	0.32642	0.999711	ENSG00000070366.14	SMG6
1569.76	-0.0616733	0.0642699	-0.959598	0.337257	0.999711	ENSG00000070367.16	EXOC5
124.911	0.0987397	0.20498	0.481704	0.630016	0.999711	ENSG00000070371.16	CLTCL1
4.77168	0.475499	0.957216	0.496752	0.619364	0.999711	ENSG00000070388.11	FGF22
58.0626	-0.107812	0.281542	-0.382933	0.701769	0.999711	ENSG00000070404.10	FSTL3
763.712	0.124784	0.0888884	1.40383	0.16037	0.999711	ENSG00000070413.20	DGCR2
662.773	0.116025	0.0860226	1.34878	0.177408	0.999711	ENSG00000070423.18	RNF126
328.244	0.290891	0.12421	2.34194	0.019184	0.999711	ENSG00000070444.15	MNT
277.097	-0.0957068	0.131961	-0.725266	0.468289	0.999711	ENSG00000070476.15	ZXDC
592.844	0.0980193	0.091416	1.07223	0.283615	0.999711	ENSG00000070495.14	JMJD6
347.923	-0.0658082	0.115201	-0.571246	0.567833	0.999711	ENSG00000070501.12	POLB
101.633	0.0707712	0.215055	0.329083	0.742093	0.999711	ENSG00000070540.13	WIPI1
0.474272	-0.887716	3.07237	-0.288935	0.772631	NA	ENSG00000070601.10	FRMPD1
294.449	0.224774	0.124094	1.81132	0.0700912	0.999711	ENSG00000070610.14	GBA2
1718.5	0.00348328	0.05834	0.0597065	0.952389	0.999711	ENSG00000070614.15	NDST1
744.152	0.000451091	0.0867847	0.00519782	0.995853	0.999711	ENSG00000070669.17	ASNS
667.319	-0.0515453	0.0869649	-0.592714	0.553373	0.999711	ENSG00000070718.12	AP3M2
13.8751	0.505431	0.594562	0.85009	0.395275	0.999711	ENSG00000070731.10	ST6GALNAC2
20480.3	0.0628231	0.0313133	2.00628	0.0448268	0.999711	ENSG00000070756.16	PABPC1
6.20986	-0.167127	0.844668	-0.197861	0.843154	0.999711	ENSG00000070759.17	TESK2
982.549	0.0676401	0.0738493	0.91592	0.359709	0.999711	ENSG00000070761.8	CFAP20
2531.12	-0.0693455	0.0634216	-1.09341	0.274215	0.999711	ENSG00000070770.9	CSNK2A2
54.4417	0.109725	0.295325	0.37154	0.710236	0.999711	ENSG00000070778.13	AL162171.1
883.27	0.0103236	0.0786804	0.13121	0.89561	0.999711	ENSG00000070785.16	EIF2B3
2584.7	0.0619462	0.0504709	1.22736	0.219686	0.999711	ENSG00000070814.19	TCOF1
5441.48	-0.0143789	0.0399599	-0.359833	0.718972	0.999711	ENSG00000070831.16	CDC42
2428.5	-0.0215889	0.0500505	-0.431343	0.666219	0.999711	ENSG00000070882.13	OSBPL3
11.1819	0.478975	0.650317	0.736526	0.461411	0.999711	ENSG00000070886.12	EPHA8
0.3272	-0.0687598	3.80293	-0.0180807	0.985574	NA	ENSG00000070915.9	SLC12A3
809.589	0.0454181	0.0777991	0.583786	0.559364	0.999711	ENSG00000070950.10	RAD18
717.952	-0.0745685	0.0820717	-0.908578	0.363573	0.999711	ENSG00000070961.15	ATP2B1
260.773	0.0149342	0.131703	0.113393	0.909719	0.999711	ENSG00000071051.14	NCK2
2503.56	-0.00871961	0.0479704	-0.181771	0.855763	0.999711	ENSG00000071054.16	MAP4K4
45.6308	0.0812133	0.314402	0.25831	0.796167	0.999711	ENSG00000071073.13	MGAT4A
9804.06	0.0189807	0.0396606	0.47858	0.632238	0.999711	ENSG00000071082.11	RPL31
4369.07	0.0558082	0.0402017	1.38821	0.165074	0.999711	ENSG00000071127.17	WDR1
1188.95	0.0391675	0.0666151	0.587968	0.556554	0.999711	ENSG00000071189.21	SNX13
176.108	-0.113789	0.162556	-0.699996	0.48393	0.999711	ENSG00000071205.11	ARHGAP10
4.64485	-0.0930946	0.974388	-0.0955416	0.923885	0.999711	ENSG00000071242.12	RPS6KA2
274.066	0.0671537	0.13041	0.514944	0.606592	0.999711	ENSG00000071243.16	ING3
57.8146	0.241123	0.309962	0.777912	0.436621	0.999711	ENSG00000071246.11	VASH1
21.4928	-0.0815231	0.460744	-0.176938	0.859557	0.999711	ENSG00000071282.12	LMCD1
2516.05	-0.00137284	0.0478567	-0.0286864	0.977115	0.999711	ENSG00000071462.11	BUD23
816.783	-0.0901761	0.0795283	-1.13389	0.256842	0.999711	ENSG00000071537.14	SEL1L
2112.81	0.00598179	0.0565705	0.10574	0.915788	0.999711	ENSG00000071539.14	TRIP13
823.783	0.00395504	0.0781092	0.0506348	0.959617	0.999711	ENSG00000071553.17	ATP6AP1
1850.96	0.0999926	0.0550901	1.81507	0.0695125	0.999711	ENSG00000071564.15	TCF3
1105.9	-0.160721	0.0689922	-2.32955	0.0198298	0.999711	ENSG00000071575.11	TRIB2
2335.53	0.0238814	0.0506638	0.47137	0.637376	0.999711	ENSG00000071626.16	DAZAP1
1139.23	0.0909155	0.0728781	1.2475	0.212214	0.999711	ENSG00000071655.18	MBD3
2389.2	-0.0267277	0.048888	-0.546713	0.584576	0.999711	ENSG00000071794.16	HLTF
877.599	0.125627	0.0800848	1.56868	0.116724	0.999711	ENSG00000071859.15	FAM50A
303.28	0.0832781	0.125797	0.662005	0.507968	0.999711	ENSG00000071889.16	FAM3A
996.585	0.126161	0.0800642	1.57575	0.115084	0.999711	ENSG00000071894.17	CPSF1
1263.56	-0.0408015	0.0676483	-0.603142	0.546414	0.999711	ENSG00000071967.12	CYBRD1
0.540878	-1.03595	2.93993	-0.352373	0.724559	NA	ENSG00000071991.8	CDH19
1455.7	0.0907325	0.0651711	1.39222	0.163856	0.999711	ENSG00000071994.10	PDCD2
1161.56	0.0254854	0.0673574	0.378361	0.705162	0.999711	ENSG00000072042.13	RDH11
945.421	0.0562228	0.0729871	0.770312	0.441115	0.999711	ENSG00000072062.13	PRKACA
854.623	0.0508312	0.077234	0.658145	0.510445	0.999711	ENSG00000072071.16	ADGRL1
3250.36	0.0423107	0.0483939	0.874299	0.381956	0.999711	ENSG00000072110.13	ACTN1
309.791	-0.204591	0.120954	-1.69147	0.0907464	0.999711	ENSG00000072121.16	ZFYVE26
391.291	0.113431	0.121357	0.934695	0.349945	0.999711	ENSG00000072134.15	EPN2
402.353	0.0384631	0.109142	0.352413	0.724528	0.999711	ENSG00000072135.13	PTPN18
42.4564	-0.133177	0.329763	-0.403856	0.686319	0.999711	ENSG00000072163.19	LIMS2
6.23824	0.0910042	0.823892	0.110456	0.912047	0.999711	ENSG00000072182.12	ASIC4
24.8326	-0.115546	0.448423	-0.257671	0.796661	0.999711	ENSG00000072195.15	SPEG
4.75511	-0.126549	1.03453	-0.122325	0.902641	0.999711	ENSG00000072201.13	LNX1
828.633	-0.0201071	0.0797936	-0.251989	0.801049	0.999711	ENSG00000072210.18	ALDH3A2
14303.9	0.0286803	0.0298644	0.960352	0.336878	0.999711	ENSG00000072274.13	TFRC
932.906	0.0830039	0.0806433	1.02927	0.303352	0.999711	ENSG00000072310.16	SREBF1
3228.35	0.0265084	0.0554601	0.477973	0.632669	0.999711	ENSG00000072364.13	AFF4
275.501	0.0213082	0.137416	0.155064	0.876771	0.999711	ENSG00000072401.15	UBE2D1
1050.18	-0.101805	0.0723313	-1.40748	0.159285	0.999711	ENSG00000072415.8	MPP5
0.530234	0.856783	2.9591	0.289541	0.772167	NA	ENSG00000072422.17	RHOBTB1
2113.24	-0.0672958	0.0544274	-1.23643	0.216298	0.999711	ENSG00000072501.17	SMC1A
664.905	0.0562816	0.0909211	0.619015	0.535906	0.999711	ENSG00000072506.12	HSD17B10
420.32	0.0162704	0.111084	0.14647	0.88355	0.999711	ENSG00000072518.20	MARK2
3707.07	-0.0645982	0.0492882	-1.31062	0.189986	0.999711	ENSG00000072571.20	HMMR
481.727	0.0581929	0.102506	0.567703	0.570236	0.999711	ENSG00000072609.17	CHFR
451.02	-0.0230189	0.103652	-0.22208	0.824252	0.999711	ENSG00000072682.18	P4HA2
1249.93	-0.0461759	0.0679306	-0.679751	0.496662	0.999711	ENSG00000072736.19	NFATC3
324.763	-0.0307827	0.12302	-0.250226	0.802413	0.999711	ENSG00000072756.17	TRNT1
2570.54	0.0791198	0.0474971	1.66578	0.0957566	0.999711	ENSG00000072778.20	ACADVL
260.759	0.0712051	0.132453	0.537586	0.590863	0.999711	ENSG00000072786.13	STK10
1745.65	-0.0468062	0.0548414	-0.853482	0.393392	0.999711	ENSG00000072803.17	FBXW11
14.2316	-0.763525	0.569819	-1.33994	0.180264	0.999711	ENSG00000072818.12	ACAP1
786.585	-0.147236	0.077891	-1.89029	0.0587195	0.999711	ENSG00000072849.11	DERL2
919.85	0.0748599	0.0739983	1.01164	0.311709	0.999711	ENSG00000072864.15	NDE1
87.5875	-0.121347	0.236764	-0.512523	0.608285	0.999711	ENSG00000072954.7	TMEM38A
[truncated: 22,870 more rows]

## Sheet: NQO1-163 napa_vs_DMSO
baseMean	log2FoldChange	lfcSE	stat	pvalue	padj	EnsemblID	GeneName
[truncated: 24,908 more rows]
